# Supplementary material
Source: publisher figshare collection journal article supplement (https://acs.figshare.com/ndownloader/files/4401865)

# Supporting Information

## Construction of Methylenecycloheptane Frameworks through 7-*Exo-dig* Cyclization of Acetylenic Silyl Enol Ethers Catalyzed by Triethynylphosphine–Gold Complex

Hideto Ito, Hirohisa Ohmiya and Masaya Sawamura\*  
*Department of Chemistry, Faculty of Science, Hokkaido University,  
Sapporo 060-0810, Japan*

1. General . . . . . S1
2. Preparation of Cationic Gold-Phosphine Complex . . . . . S1
2. General Procedure for Alkyne Cyclizations . . . . . S2
3. Preparation of Substrate . . . . . S2
4. Cyclization Products . . . . . S15
5. References . . . . . S19
6. Copies of NMR Spectrum Charts . . . . . S20

### General.

NMR spectra were recorded on a Varian Gemini 2000 spectrometer, operating at 300 MHz for  $^1\text{H}$  NMR, 75.4 MHz for  $^{13}\text{C}$  NMR and 121.4 MHz for  $^{31}\text{P}$  NMR. Chemical shift values for  $^1\text{H}$ ,  $^{13}\text{C}$  and  $^{31}\text{P}$  NMR are reference to  $\text{Me}_4\text{Si}$ , the residual solvent resonances and external aqueous 85%  $\text{H}_3\text{PO}_4$  respectively. Mass spectrometry (JEOL JMS-FABmate for EI-MS, JEOL JMS-700TZ for ESI-MS) and elemental analysis were performed at the Instrumental Analysis Division, Equipment Management Center, Creative Research Institution, Hokkaido University. Triethynylphosphine ligand **L1** was prepared according to the reported procedure.<sup>1</sup>  $\text{AgNTf}_2$  was prepared from  $\text{Ag}_2\text{O}$  and  $\text{HN}(\text{SO}_2\text{CF}_3)_2$ .<sup>2</sup>  $\text{AgSbF}_6$ ,  $\text{AgBF}_4$  and  $\text{AgOTf}$  were purchased from Aldrich. Phosphine ligands,  $\text{PPh}_3$  and  $\text{P}(\text{O}i\text{Pr})_3$  were commercially available. Gold complexes  $[\text{AuCl}(\text{ligand})]$  were synthesized by the reported method.<sup>1</sup> MS4A was purchased from Junsei Chemical Co. Anhydrous solvents used in the synthesis of materials were purchased from Kanto Chemical Co. and used without further purification. Anhydrous  $\text{CH}_2\text{Cl}_2$  and DCE were purchased from Kanto Chemical Co. and Aldrich, respectively. Anhydrous  $\text{CH}_2\text{Cl}_2$ , DCE, MeOH, 1.0 M  $t\text{BuOH}$  in  $\text{CH}_2\text{Cl}_2$  and 1.0 M  $t\text{BuOH}$  in DCE used in Au-catalyzed cyclizations were degassed and dried with MS4A before use, and their water amount (almost always under 15 ppm) was measured by Karl Fisher's moisture meter (Kyoto Electronics Manufacturing Co. Ltd., MKC-520). Gel permeation chromatography (GPC) was performed by LC-908 (Japan Analytical Industry Ltd., two in-line JAIGEL-2H,  $\text{CHCl}_3$ , 3.5 mL/min, UV and RI detectors). TLC analyses were performed on commercial glass plates bearing 0.25-mm layer of Merck Silica gel 60F<sub>254</sub>. Silica gel (Kanto Chemical Co., Silica gel 60 N, spherical, neutral) was used for column chromatography. PTLC purification was performed on commercial glass plates bearing 1-mm layer of Merck Silica gel 60F<sub>254</sub>. All reactions were carried out under argon atmosphere unless otherwise noted.

### Preparation of Cationic Gold-Phosphine Complexs<sup>1</sup>

$[\text{AuCl}(\text{ligand})]$  (1 eq) was placed in an open vial tube, and was dissolved in  $\text{CH}_2\text{Cl}_2$  (ca. 0.1 M).  $\text{AgX}$  (>1.5 eq) was added, and a mixture was stirred at 25 °C for 10 min. The resulting white suspension was filtered through celite to a screw vial. The resulting colorless solution was first concentrated with a stream of Ar gas, and then was dried *in vacuo* to give  $[\text{AuX}(\text{ligand})]$ .

## General Procedure for Cyclization of Alkynyl Silyl Enol Ethers.

MS4A (ca. 100 mg) was added to a Schlenk tube, and vigorously stirred with heating by heat gun for 5 min in *vacuo*. Then, a flask was cooled to rt and charged with Ar. Au catalyst, CH<sub>2</sub>Cl<sub>2</sub> (3.9 mL) and 1.0 M <sup>t</sup>BuOH in CH<sub>2</sub>Cl<sub>2</sub> (0.10 mL, 0.10 mmol) were added to a Schlenk tube in this order. The reaction vessel was placed into water bath (for 25 °C or 40 °C) or oil bath (for 80 °C). The alkynyl silyl enol ether (0.10 mmol) was weighed into micro tube and diluted with CH<sub>2</sub>Cl<sub>2</sub> (0.25 mL). The mixture was added dropwise to the Schlenk tube by a well dried 250  $\mu$ L syringe over 1 min. The substrate solutions remaining in the micro tube and the syringe were washed with CH<sub>2</sub>Cl<sub>2</sub> (3  $\times$  0.25 mL) and added to the reaction mixture. The mixture was stirred at appropriate temperature. After completion of the reaction (monitored by TLC), the resulting mixture was passed through a pad of silica gel and concentrated to dryness. Purification by flash chromatography on silica gel or PTLC gave the cyclization product.

## Preparation of Substrates.

### Scheme 1. Preparations of 1a and 1c–1f.

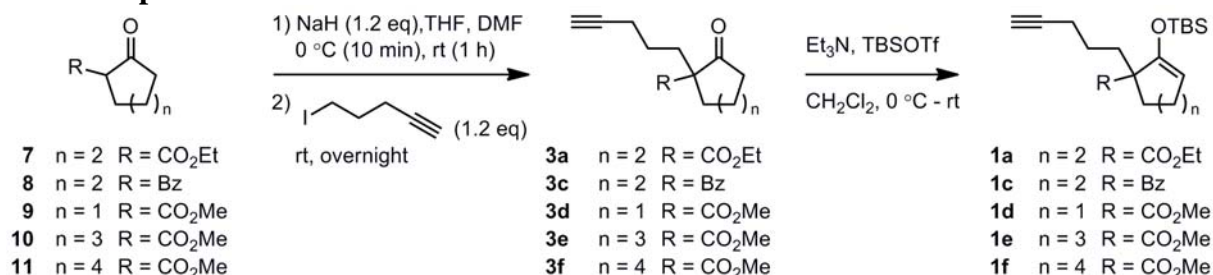

### Ethyl 2-Oxo-1-(4-pentyn-1-yl)cyclohexanecarboxylate (3a)

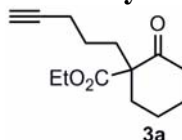

To a suspension of NaH (60 wt. %, 910 mg, 22.8 mmol) in THF (10 mL) and DMF (10 mL) was added dropwise ethyl 2-oxocyclohexanecarboxylate (**7**) (3.28 mL, 20.0 mmol) at 0 °C. The mixture was stirred at this temperature for 10 min and at room temperature for 1 h. Then, 5-iodo-1-pentyne (4.67 g, 24.1 mmol) was added, and the reaction mixture was stirred for 18 h (monitored by TLC). The resulting suspension was diluted with ether, and quenched with saturated aqueous NH<sub>4</sub>Cl. The organic layer was washed with saturated aqueous NH<sub>4</sub>Cl (3  $\times$  20 mL), and separated. The combined aqueous layer was extracted with ether (3  $\times$  20 mL). The organic layers were combined, dried over MgSO<sub>4</sub>, filtered and concentrated under reduced pressure. The residue was purified by flash chromatography on silica gel (hexane/EtOAc 99:1 to 92:8) to afford **3a** as a colorless oil (4.68 g, 99%). IR (neat) 636, 1181, 1708, 2941, 3287 cm<sup>-1</sup>; <sup>1</sup>H NMR (CDCl<sub>3</sub>)  $\delta$  1.27 (t, *J* = 7.2 Hz, 3H), 1.35–1.80 (m, 7H), 1.89–2.06 (m, 2H), 1.95 (t, *J* = 2.7 Hz, 1H), 2.19 (td, *J* = 6.9, 2.7 Hz, 2H), 2.37–2.56 (m, 3H), 4.24 (q, *J* = 7.2 Hz, 2H). <sup>13</sup>C NMR (CDCl<sub>3</sub>)  $\delta$  13.80, 18.43, 22.20, 23.10, 27.25, 33.54, 35.77, 40.74, 60.29, 60.94, 68.42, 83.60, 171.78, 207.72. HRMS (ESI<sup>+</sup>) Calcd for C<sub>14</sub>H<sub>20</sub>O<sub>3</sub>Na [M+Na]<sup>+</sup>: *m/z* 259.13047. Found: *m/z* 259.13018.

### Ethyl 2-(*tert*-Butyldimethylsiloxy)-1-(4-pentyn-1-yl)-2-cyclohexenecarboxylate (1a)

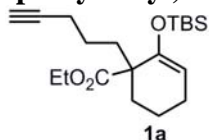

To a solution of **3a** (1.19 g, 5.05 mmol) and Et<sub>3</sub>N (1.39 mL, 10.0 mmol) in CH<sub>2</sub>Cl<sub>2</sub> (10 mL), TBSOTf (1.76 mL, 7.51 mmol) was added at 0 °C under Ar atmosphere, then the reaction mixture was slowly warmed to room temperature and stirred overnight. The resulting suspension was diluted with ether, and quenched with saturated aqueous NaHCO<sub>3</sub>. The organic layer was washed with water (2 × 10 mL) and brine (10 mL), and separated. The combined aqueous layer was extracted with ether (3 × 10 mL). The organic layers were combined, dried over MgSO<sub>4</sub>, filtered and concentrated under reduced pressure. Purification by flash chromatography on silica gel (hexane/EtOAc 99.5:0.5 to 97:3) provided **1a** as a colorless oil (1.66 g, 94%). IR (neat) 777, 833, 926, 1156, 1662, 1726, 2931, 2951, 3313 cm<sup>-1</sup>; <sup>1</sup>H NMR (CDCl<sub>3</sub>) δ 0.14 (s, 3H), 0.17 (s, 3H), 0.88 (s, 9H), 1.25 (t, *J* = 7.2 Hz, 3H), 1.42–1.72 (m, 5H), 1.88–1.89 (m, 2H), 1.94 (t, *J* = 2.7 Hz, 1H), 1.95–2.08 (m, 3H), 2.19 (td, *J* = 7.2, 2.7 Hz, 2H), 4.03–4.21 (m, 2H), 4.84 (aprox. dd, *J* = 4.5, 3.6 Hz, 1H). <sup>13</sup>C NMR (CDCl<sub>3</sub>) δ -5.46, -4.55, 14.07, 17.85, 18.84, 19.19, 23.57, 23.82, 25.46, 31.81, 34.22, 50.53, 60.34, 68.16, 84.39, 103.93, 149.80, 175.81. Anal. Calcd for C<sub>20</sub>H<sub>34</sub>O<sub>3</sub>Si: C, 68.52; H, 9.78%. Found: C, 68.21; H, 9.78%.

### Ethyl 1-(4-Pentyn-1-yl)-2-(triisopropylsiloxy)-2-cyclohexenecarboxylate (**1b**)

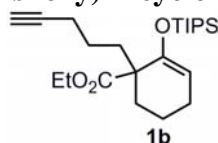

To a solution of **3a** (1.19 g, 5.05 mmol) and 2,6-lutidine (0.399 mL, 3.40 mmol) in CH<sub>2</sub>Cl<sub>2</sub> (3.4 mL), TIPSOTf (0.685 mL, 2.55 mmol) was added at 0 °C under Ar atmosphere. Then the reaction mixture was slowly warmed to room temperature and stirred for 18 h. The resulting suspension was diluted with ether, and quenched with saturated aqueous NaHCO<sub>3</sub>. The organic layer was washed with water (2 × 5 mL) and brine (5 mL), and separated. The combined aqueous layer was extracted with ether (3 × 5 mL). The organic layers were combined, dried over MgSO<sub>4</sub>, filtered and concentrated under reduced pressure. Purification by flash chromatography on silica gel (hexane/EtOAc 99.5:0.5 to 97:3) provided **1b** as a colorless oil (0.645 g, 97%). IR (neat) 624, 881, 925, 1185, 1463, 1662, 1727, 2866, 2943, 3313 cm<sup>-1</sup>; <sup>1</sup>H NMR (CDCl<sub>3</sub>) δ 1.03–1.20 (s, 21H), 1.24 (t, *J* = 7.2 Hz, 3H), 1.52–1.68 (m, 5H), 1.80–2.00 (m, 3H), 1.93 (t, *J* = 2.7 Hz, 1H), 2.19 (td, *J* = 7.2, 2.7 Hz, 2H), 4.00–4.21 (m, 2H), 4.85 (t, *J* = 4.2 Hz, 1H). <sup>13</sup>C NMR (CDCl<sub>3</sub>) δ 12.66, 14.02, 17.97, 18.08, 18.90, 19.15, 23.63, 23.79, 31.74, 34.37, 50.49, 60.35, 68.13, 84.41, 103.16, 150.01, 175.75. HRMS (ESI<sup>+</sup>) Calcd for C<sub>23</sub>H<sub>40</sub>O<sub>3</sub>SiNa [M+Na]<sup>+</sup>: *m/z* 415.26389. Found: *m/z* 415.26293.

### 2-Benzoyl-2-(4-pentyn-1-yl)cyclohexanone (**3c**)

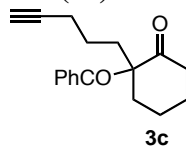

The compound **3c** was prepared according to the procedure for the preparation of **3a**, employing 2-benzoylcyclohexanone **8** (2.01 g, 10.0 mmol), NaH (481 mg, 12.0 mmol), 5-iodo-1-pentyne (2.33 g, 12.0 mmol) and hexane/EtOAc (99:1 to 85:15) as an eluent. Colorless oil (951 mg, 35%). IR (neat) 634, 689, 1212, 1667, 1709, 2943, 3292 cm<sup>-1</sup>; <sup>1</sup>H NMR (CDCl<sub>3</sub>) δ 1.13–1.30 (m, 1H), 1.35–1.58 (m, 2H), 1.63–1.85 (m, 3H), 1.87 (t, *J* = 2.7 Hz, 1H), 1.92–2.34 (m, 6H), 2.39–2.48 (m, 1H), 2.87–2.96 (m, 1H), 7.38–7.45 (m, 2H), 7.50–7.57 (m, 1H), 7.83–7.88 (m, 2H). <sup>13</sup>C NMR (CDCl<sub>3</sub>) δ 18.58, 22.05, 22.56, 28.92, 34.32, 37.42, 42.83, 66.30, 68.63, 83.54, 128.70, 128.72, 133.08, 136.54, 197.75, 212.25. HRMS (ESI<sup>+</sup>) Calcd for C<sub>18</sub>H<sub>20</sub>O<sub>2</sub>Na [M+Na]<sup>+</sup>: *m/z* 291.12555. Found: *m/z* 291.13521. *O*-Alkylation product **12** was also obtained as by-product (ca. 35%).

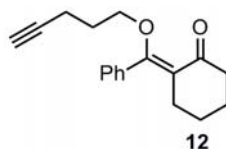

**[2-(*tert*-Butyldimethylsiloxy)-1-(4-pentyn-1-yl)-2-cyclohexen-1-yl](phenyl)methanone (1c)**

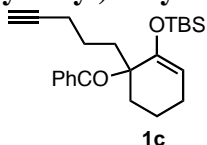

The compound **1c** was prepared according to the procedure for the preparation of **1a**, employing **3c** (674 mg, 2.51 mmol), Et<sub>3</sub>N (0.525 mL, 3.77 mmol), TBSOTf (0.706 mL, 3.01 mmol) in CH<sub>2</sub>Cl<sub>2</sub> (10 mL) and hexane/EtOAc (99.5:0.5 to 95:5) as an eluent. Colorless oil (861 mg, 90%). IR (neat) 832, 1174, 1249, 1655, 1680, 2930, 2950, 3311 cm<sup>-1</sup>; <sup>1</sup>H NMR (CDCl<sub>3</sub>) δ -0.05 (s, 3H), 0.12 (s, 3H), 0.65 (s, 9H), 1.55–1.81 (m, 5H), 1.90–2.09 (m, 3H), 2.11–2.31 (m, 5H), 4.89 (dd, *J* = 4.5, 3.6 Hz, 1H), 7.31–7.39 (m, 2H), 7.41–7.49 (m, 1H), 7.93–8.00 (m, 2H). <sup>13</sup>C NMR (CDCl<sub>3</sub>) δ -5.31, -5.22, 17.51, 18.63, 19.00, 23.64, 24.38, 25.09, 31.72, 35.92, 54.91, 68.08, 84.33, 101.95, 127.71, 128.48, 131.35, 137.72, 152.13, 203.49. HRMS (EI<sup>+</sup>) Calcd for C<sub>24</sub>H<sub>35</sub>O<sub>2</sub>Si [M+H]<sup>+</sup>: *m/z* 383.24063. Found: *m/z* 383.24211.

**Methyl 2-Oxo-1-(4-pentyn-1-yl)cyclopentanecarboxylate (3d)**

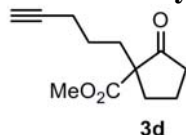

The compound **3d** was prepared according to the procedure for the preparation of **3a**, employing methyl 2-oxocyclopentanecarboxylate **9** (1.24 mL, 9.99 mmol), NaH (482 mg, 12.0 mmol) and 5-iodo-1-pentyne (2.15 g, 11.1 mmol). Purification by flash chromatography on silica gel (hexane/EtOAc 99:1 to 85:15) provided **3d** as a mixture of a trace amount of impurities. This mixture was used in the next step without further purification.

**Methyl 2-(*tert*-Butyldimethylsiloxy)-1-(4-pentyn-1-yl)-2-cyclopentenecarboxylate (1d)**

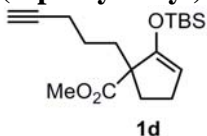

The compound **1d** was prepared according to the procedure for the preparation of **1a**, employing **3d** (a mixture of impurities, <9.99 mmol), Et<sub>3</sub>N (2.03 mL, 14.6 mmol), TBSOTf (2.27 mL, 9.68 mmol) in CH<sub>2</sub>Cl<sub>2</sub> (10 mL) and hexane/EtOAc (99.5:0.5 to 95:5) as an eluent. Colorless oil (2.14 g, 2 steps overall 96%). IR (neat) 781, 837, 854, 1251, 1647, 1730, 2858, 2931, 2951, 3313 cm<sup>-1</sup>; <sup>1</sup>H NMR (CDCl<sub>3</sub>) δ 0.16 (s, 3H), 0.20 (s, 3H), 0.94 (s, 9H), 1.46–1.61 (m, 2H), 1.70–1.96 (m, 3H), 1.98 (t, *J* = 2.7 Hz, 1H), 2.19–2.28 (m, 3H), 2.30–2.41 (m, 2H), 3.69 (s, 3H), 4.69 (br d, *J* = 2.4 Hz, 1H). <sup>13</sup>C NMR (CDCl<sub>3</sub>) δ -5.79, -5.12, 17.64, 18.65, 23.57, 25.21, 26.20, 31.53, 33.55, 51.44, 57.85, 68.22, 84.09, 102.23, 154.06, 175.66. HRMS (EI<sup>+</sup>) Calcd for C<sub>18</sub>H<sub>30</sub>O<sub>3</sub>SiNa [M+Na]<sup>+</sup>: *m/z* 345.18564. Found: *m/z* 345.18531.

**Methyl 2-Oxo-1-(4-pentyn-1-yl)cycloheptanecarboxylate (3e)**



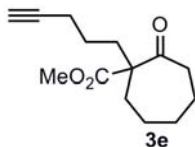

The compound **3e** was prepared according to the procedure for the preparation of **3a**, employing methyl 2-oxocycloheptanecarboxylate **10** (1.58 g, 10.0 mmol), NaH (482 mg, 12.1 mmol), 5-iodo-1-pentyne (2.15 g, 11.1 mmol) and hexane/EtOAc (99:1 to 85:15) as an eluent. Colorless oil (2.26 g, 96%). IR (neat) 631, 1150, 1168, 1224, 1701, 1732, 2962, 2934, 3286  $\text{cm}^{-1}$ ;  $^1\text{H}$  NMR ( $\text{CDCl}_3$ )  $\delta$  1.40–1.82 (m, 10H), 1.95 (t,  $J = 2.7$  Hz, 1H), 2.00–2.24 (m, 4H), 2.44–2.54 (m, 1H), 2.58–2.68 (m, 1H), 3.73 (s, 3H).  $^{13}\text{C}$  NMR ( $\text{CDCl}_3$ )  $\delta$  18.52, 23.56, 24.59, 25.37, 29.66, 32.61, 34.33, 41.77, 52.01, 62.47, 68.54, 83.65, 172.90, 209.48. HRMS (ESI $^+$ ) Calcd for  $\text{C}_{14}\text{H}_{20}\text{O}_3\text{Na}$   $[\text{M}+\text{Na}]^+$ :  $m/z$  259.13047. Found:  $m/z$  259.13016.

**Methyl 2-(*tert*-Butyldimethylsiloxy)-1-(4-pentyn-1-yl)-2-cycloheptenecarboxylate (1e)**

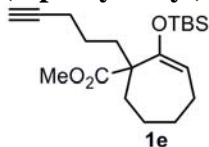

The compound **1e** was prepared according to the procedure for the preparation of **1a**, employing **3e** (958 mg, 4.06 mmol),  $\text{Et}_3\text{N}$  (1.70 mL, 12.2 mmol), TBSOTf (1.90 mL, 8.10 mmol) in  $\text{CH}_2\text{Cl}_2$  (8.1 mL) and hexane/EtOAc/ $\text{Et}_3\text{N}$  (99:0:1 to 95:4:1) as an eluent. Colorless oil (1.24 g, 87%). IR (neat) 776, 837, 1164, 1732, 2858, 2930, 2950, 3313  $\text{cm}^{-1}$ ;  $^1\text{H}$  NMR ( $\text{CDCl}_3$ )  $\delta$  0.14 (s, 3H), 0.16 (s, 3H), 0.87 (s, 9H), 1.48–1.75 (m, 6H), 1.79–2.95 (m, 5H), 1.96–2.05 (m, 2H), 2.20 (td,  $J = 7.2, 2.7$  Hz, 2H), 3.66 (s, 3H), 4.97 (dd,  $J = 7.2, 5.7$  Hz, 1H).  $^{13}\text{C}$  NMR ( $\text{CDCl}_3$ )  $\delta$  -5.18, -4.70, 17.89, 18.87, 22.69, 23.47, 23.58, 25.50, 26.43, 31.35, 35.40, 51.38, 55.99, 68.20, 84.36, 108.47, 153.13, 175.54. HRMS (EI $^+$ ) Calcd for  $\text{C}_{20}\text{H}_{34}\text{O}_3\text{SiNa}$   $[\text{M}+\text{Na}]^+$ :  $m/z$  373.21694. Found:  $m/z$  373.21606.

**Methyl 2-Oxo-1-(4-pentyn-1-yl)cyclooctanecarboxylate (3f)**

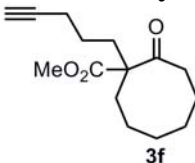

The compound **3f** was prepared according to the procedure for the preparation of **3a**, employing methyl 2-oxocyclooctanecarboxylate **11**<sup>3</sup> (1.47 g, 8.03 mmol), NaH (386 mg, 9.64 mmol), 5-iodo-1-pentyne (1.87 g, 9.64 mmol) and hexane/EtOAc (99:1 to 85:15) as an eluent. Colorless oil (1.81 g, 90%). IR (neat) 631, 1077, 1166, 1219, 1704, 2858, 2930, 3287  $\text{cm}^{-1}$ ;  $^1\text{H}$  NMR ( $\text{CDCl}_3$ )  $\delta$  0.90–1.05 (m, 1H), 1.26–1.90 (m, 9H), 1.95 (t,  $J = 2.7$  Hz, 1H), 1.97–2.32 (m, 6H), 2.43–2.55 (m, 1H), 2.71 (td,  $J = 12.0, 3.9$  Hz, 1H), 3.70 (s, 3H).  $^{13}\text{C}$  NMR ( $\text{CDCl}_3$ )  $\delta$  18.51, 22.87, 23.61, 23.90, 25.23, 28.13, 29.03, 29.88, 38.28, 52.12, 61.82, 68.46, 83.67, 172.19, 212.25. Anal. Calcd for  $\text{C}_{15}\text{H}_{22}\text{O}_3$ : C, 71.97; H, 8.86%. Found: C, 71.69; H, 8.90%.

**Methyl 2-(*tert*-Butyldimethylsiloxy)-1-(4-pentyn-1-yl)-2-cyclooctenecarboxylate (1f)**

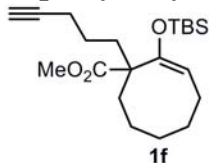

The compound **1f** was prepared according to the procedure for the preparation of **1a**, employing **3f** (785 mg, 3.13 mmol),  $\text{Et}_3\text{N}$  (1.31 mL, 9.40 mmol), TBSOTf (1.47, 3.01 mmol) in  $\text{CH}_2\text{Cl}_2$  (10 mL) and

hexane/EtOAc (99.5:0.5 to 95:5) as an eluent. Colorless oil (861 mg, 90%). IR (neat) 627, 776, 837, 1146, 1648, 1731, 2929, 2950, 3313  $\text{cm}^{-1}$ ;  $^1\text{H}$  NMR ( $\text{CDCl}_3$ )  $\delta$  0.18 (s, 6H), 0.88 (s, 9H), 1.32–1.45 (m, 1H), 1.46–1.67 (m, 6H), 1.73–2.03 (m, 5H), 1.93 (t,  $J$  = 2.7 Hz, 1H), 2.13–2.42 (m, 2H), 2.18 (td,  $J$  = 7.8, 2.7 Hz, 2H), 3.67 (s, 3H), 4.75 (dd,  $J$  = 11.5, 9.3 Hz, 1H).  $^{13}\text{C}$  NMR ( $\text{CDCl}_3$ )  $\delta$  –5.15, –5.55, 17.92, 18.79, 22.94, 23.10, 23.41, 25.40, 25.59, 27.36, 34.13, 36.79, 51.24, 56.23, 68.23, 84.35, 104.81, 152.01, 175.55. Anal. Calcd for  $\text{C}_{21}\text{H}_{36}\text{O}_3\text{Si}$ : C, 69.18; H, 9.95%. Found: C, 68.83; H, 10.02%.

## Scheme 2. Preparation of **1g**.<sup>4</sup>

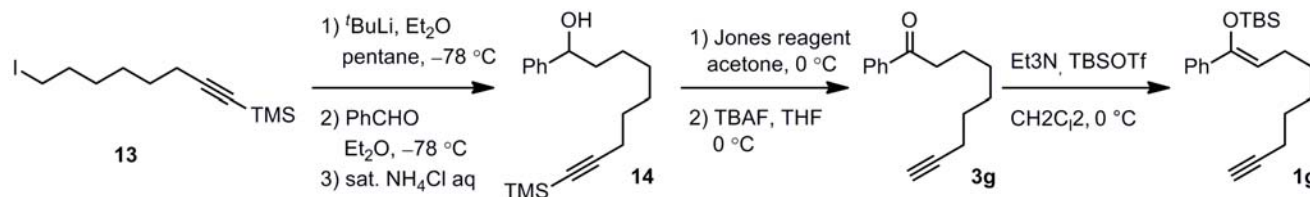

### 1-Phenyl-8-nonyn-1-one (**3g**)

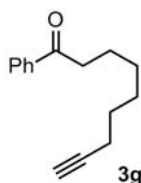

To a solution of the 8-iodo-1-(trimethylsilyl)-1-octyne (**13**)<sup>5</sup> (1.96 g 6.35 mmol) in pentane/ $\text{Et}_2\text{O}$  (3:2, 60 mL) was added dropwise  $t\text{BuLi}$  (7.98 mL of 1.59 M in  $\text{Et}_2\text{O}$ , 12.7 mmol) at  $-78^\circ\text{C}$  under Ar atmosphere. The reaction mixture was stirred at this temperature for 20 min. Then a solution of benzaldehyde (656 mg, 6.15 mmol) in  $\text{Et}_2\text{O}$  (6 mL) was added and the mixture was stirred at  $-78^\circ\text{C}$  for 1 h before being quenched with saturated aqueous  $\text{NH}_4\text{Cl}$ . The organic layer was washed with water ( $2 \times 50$  mL) and brine (50 mL), and separated. The combined aqueous layer was extracted with ether ( $3 \times 50$  mL). The organic layers were combined, dried over  $\text{MgSO}_4$ , filtered and concentrated under reduced pressure to afford **14** as a crude product. This crude product was used in the next step without further purification.

To a solution of **14** (6.15 mmol) in acetone (25 mL), Jones reagent (6.50 mL of 1.00 M in  $\text{H}_2\text{SO}_4$  and  $\text{H}_2\text{O}$ , 6.50 mmol) was added dropwise at  $0^\circ\text{C}$  under air and a mixture was stirred at this temperature for 15 min. Then  $\text{MeOH}$  (5 mL) was added at  $0^\circ\text{C}$ , and the precipitates were filtered off and washed with  $\text{Et}_2\text{O}$  (30 mL). The filtrate was washed with brine ( $2 \times 50$  mL) and 15%  $\text{NaOH}$  (50 mL), and separated. The combined aqueous layer was extracted with ether ( $3 \times 50$  mL). The organic layers were combined, dried over  $\text{MgSO}_4$ , filtered and concentrated under reduced pressure to afford 1-phenyl-9-(trimethylsilyl)-8-nonyn-1-one as a crude product.

To a solution of this crude product (895 mg, 3.12 mmol) in THF (6.2 mL), TBAF (3.44 mL of 1.0 M in THF, 3.44 mL) was added at  $0^\circ\text{C}$ . After stirring at this temperature for 6 h, the reaction mixture was diluted with water (10 mL) and  $\text{Et}_2\text{O}$  (10 mL). The organic layer was washed with water ( $3 \times 10$  mL), and separated. The combined aqueous layer was extracted with ether ( $3 \times 10$  mL). The organic layers were combined, dried over  $\text{MgSO}_4$ , filtered and concentrated under reduced pressure to afford **3g** as a crude product. The residue was purified by flash chromatography on silica gel (hexane/ $\text{EtOAc}$  99:1 to 95:5) to afford **3g** as a white solid (466 mg, 3 steps overall 35%). IR (neat) 624, 688, 1266, 1447, 1679, 2859, 2932, 3289, 3306  $\text{cm}^{-1}$ ; Mp  $31.5\text{--}33.6^\circ\text{C}$ .  $^1\text{H}$  NMR ( $\text{CDCl}_3$ )  $\delta$  1.35–1.62 (m, 6H), 1.76 (quint,  $J$  = 7.2 Hz, 2H), 1.94 (t,  $J$  = 2.4 Hz, 1H), 2.20 (td,  $J$  = 6.9, 2.4 Hz, 2H), 2.98 (t,  $J$  = 7.2 Hz, 2H), 7.43–7.50 (m, 2H), 7.53–7.60 (m, 1H), 7.94–7.99 (m, 2H).  $^{13}\text{C}$  NMR ( $\text{CDCl}_3$ )  $\delta$  17.95, 23.73, 27.91, 28.18, 28.41, 38.06, 68.10, 84.24, 127.83, 128.37, 132.71, 136.85, 200.11. Anal. Calcd for  $\text{C}_{15}\text{H}_{18}\text{O}$ : C, 84.07; H, 8.47%. Found: C, 83.72; H, 8.48%.

**(Z)-tert-Butyldimethyl[(1-phenyl-1-nonen-8-yn-1-yl)oxy]silane (1g) (*E/Z* = 14/86)**

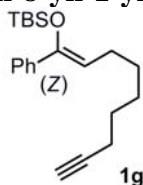

The compound **1g** was prepared according to the procedure for the preparation of **1a**, employing **3g** (446 mg, 2.09 mmol), Et<sub>3</sub>N (0.873 mL, 4.18 mmol), TBSOTf (0.980 mL, 4.18 mmol) in CH<sub>2</sub>Cl<sub>2</sub> (4.1 mL) and hexane/EtOAc (99.5/0.5 to 95/5) as the eluent. Colorless oil (651 mg, 95%, *E/Z* = 14/86). IR (neat) 626, 696, 765, 778, 836, 1063, 1253, 2857, 2930, 3312 cm<sup>-1</sup>; <sup>1</sup>H NMR of (*E*)-**1g** (CDCl<sub>3</sub>) δ 0.06 (s, 0.86×6H), 0.03 (s, 0.14×6H), 0.91 (s, 0.14×9H), 0.98 (s, 0.86×9H), 1.35–1.55 (m, 6H), 1.93 (m, 0.14×1H), 1.94 (t, *J* = 2.7 Hz, 0.86×1H), 2.05–2.24 (m, 6H), 5.01 (t, *J* = 7.2 Hz, 0.14×1H), 5.10 (t, *J* = 7.2 Hz, 0.86×1H), 7.19–7.37 (m, 3H), 7.40–7.45 (m, 2H). <sup>13</sup>C NMR of (CDCl<sub>3</sub>) δ -4.24 (0.86×1C), -4.71 (0.14×1C), 17.97 (0.14×1C), 18.13 (0.86×1C), 18.15 (0.14×1C), 18.20 (0.86×1C), 25.61 (0.14×1C), 25.73 (0.86×1C), 25.86 (0.86×1C), 27.28 (0.14×1C), 28.13 (0.14×1C), 28.23 (0.86×1C), 28.42 (0.86×1C), 29.02 (0.86×1C), 30.09 (0.14×1C), 68.16 (0.14×1C), 68.16 (1C), 84.38 (0.14×1C), 84.43 (0.86×1C), 110.96 (0.14×1C), 111.64 (0.86×1C), 125.87 (0.86×1C), 127.36 (0.86×1C), 127.60 (0.14×1C), 127.74 (0.14×1C), 127.88 (0.86×1C), 128.32 (0.14×1C), 137.93 (0.14×1C), 139.83 (0.86×1C), 149.44 (0.86×1C), 149.55 (0.14×1C). Another one peak of *E*-isomer was probably overlapped with that of *Z*-isomer. HRMS (APCI<sup>+</sup>) Calcd for C<sub>21</sub>H<sub>33</sub>OSi [M+H]<sup>+</sup>: *m/z* 329.22952. Found: *m/z* 329.22888. The geometry of major *Z*-isomer was confirmed by an NOE experiment as shown below.

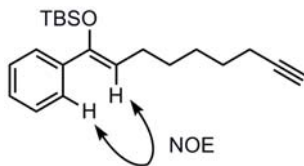

**Scheme 3. Preparation of 1h.**

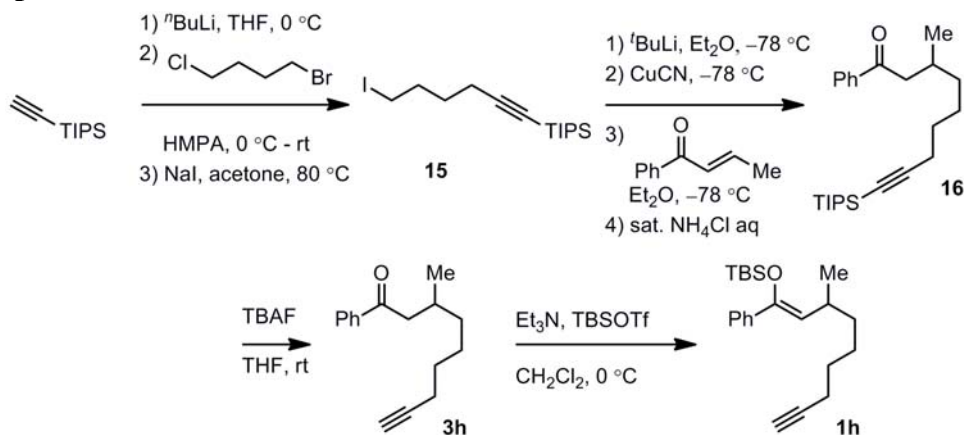

**6-iodo-1-triisopropylsilyl-1-hexyne (15)**

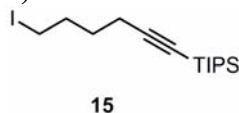

To a solution of triisopropylsilylacetylene (3.55 g, 19.5 mmol) in THF (40 mL) was added *n*-BuLi (11.6 mL of 1.67 M in hexane, 19.4 mL) at 0 °C, and the mixture was stirred at this temperature for 1 h. Then 1-bromo-4-chloro-butane (3.16 g, 18.2 mmol) and HMPA (3.38 mL, 19.4 mmol) was added at 0 °C, and the reaction mixture was allowed to warm to room temperature and stirred for 15 h. The

resulting mixture was treated with saturated aqueous  $\text{NH}_4\text{Cl}$  (30 mL) and hexane (30 mL), and the aqueous layer was separated. The organic layer was washed with water (30 mL) and brine (30 mL), and separated. The combined aqueous layer was extracted with hexane ( $3 \times 30$  mL). The organic layers were combined, dried over  $\text{MgSO}_4$ , filtered and concentrated under reduced pressure to afford the 6-chloro-1-triisopropylsilyl-1-hexyne as a crude product (pale yellow oil, 4.99 g). This crude product was used in the next step without further purification.

To a solution of 6-chloro-1-triisopropylsilyl-1-hexyne (4.99 g) in acetone (100 mL), NaI (14.6 g, 96.9 mmol) was added, and the mixture was stirred at 80 °C overnight. The resulting orange suspension was cooled to rt, solvent was removed by an evaporator, and saturated aqueous  $\text{Na}_2\text{S}_2\text{O}_3$  (50 mL) and hexane (100 mL) was added. The organic layer was washed with water ( $2 \times 50$  mL) and brine (50 mL), and separated. The combined aqueous layer was extracted with hexane ( $3 \times 50$  mL). The organic layer was combined, dried over  $\text{MgSO}_4$ , filtered and concentrated under reduced pressure. Flash silica gel column purification (hexane) of the crude product afforded **15** as a colorless oil (5.58 g, 2 steps overall 84%). IR (neat) 659, 674, 882, 1462, 2171, 2863, 2941  $\text{cm}^{-1}$ ;  $^1\text{H}$  NMR ( $\text{CDCl}_3$ )  $\delta$  1.00–1.10 (m, 21H), 1.65 (quint.,  $J = 7.2$  Hz, 2H), 1.98 (quint.,  $J = 7.2$  Hz, 2H), 2.30 (t,  $J = 6.9$  Hz, 2H), 3.23 (t,  $J = 6.9$  Hz, 2H).  $^{13}\text{C}$  NMR ( $\text{CDCl}_3$ )  $\delta$  6.04, 11.10, 18.49, 18.60, 29.21, 32.12, 80.99, 107.92. HRMS ( $\text{EI}^+$ ) Calcd for  $\text{C}_{15}\text{H}_{29}\text{Si}$  [ $\text{M}]^+$ :  $m/z$  364.10832. Found:  $m/z$  364.10752.

### 3-Methyl-1-phenyl-8-nonyn-1-one (3h)

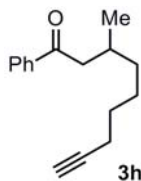

To a solution of **15** (4.64 g, 12.7 mmol) in  $\text{Et}_2\text{O}$  (120 mL) was added  $t\text{BuLi}$  (16.3 mL of 1.55 M in pentane, 25.3 mmol) at  $-78$  °C, and the mixture was stirred for 40 min. Then,  $\text{CuCN}$  (533 mg, 6.36 mmol) was added one portion to a mixture, and the pale yellow suspension was stirred at  $-78$  °C for additional 15 min. To this suspension, a solution of (*E*)-1-phenyl-2-buten-1-one (888 mg, 6.07 mmol) was added dropwise at  $-78$  °C over 7 min. The resulting dark red solution was quenched with saturated aqueous  $\text{NH}_4\text{Cl}$  (120 mL) after being stirred for 20 min (the consumption of SM was checked by TLC), and a mixture was stirred until the color of organic phase turned to blue. The organic phase was washed with saturated aqueous  $\text{NH}_4\text{Cl}$  ( $5 \times 100$  mL), and separated, dried over  $\text{MgSO}_4$ , filtered and concentrated under reduced pressure to afford the 1,4-adduct **16** as a crude product (yellow oil, 3.51 g.). The residue was purified by flash chromatography on silica gel (hexane/ $\text{EtOAc}$  99.5:0.5 to 97:3) to afford **16** as a colorless oil (611 mg, 26%).

To a solution of **16** (611 mg, 1.59 mmol) in THF (8.0 mL), TBAF (2.38 mL of 1.0 M in THF, 2.38 mL) was added at 0 °C. After stirring at room temperature for 13 h, the reaction mixture was diluted with water (10 mL) and  $\text{Et}_2\text{O}$  (5 mL). The organic layer was washed with water ( $3 \times 10$  mL), and separated. The combined aqueous layer was extracted with ether ( $3 \times 10$  mL). The organic layers were combined, dried over  $\text{MgSO}_4$ , filtered and concentrated under reduced pressure to afford **3h** as a crude product. The residue was purified by flash chromatography on silica gel (hexane/ $\text{EtOAc}$  99:1 to 96:4) to afford **3h** as a colorless oil (272 mg, 75%). IR (neat) 631, 690, 751, 1213, 1448, 1682, 2861, 2934, 3301  $\text{cm}^{-1}$ ;  $^1\text{H}$  NMR ( $\text{CDCl}_3$ )  $\delta$  0.97 (d,  $J = 6.9$  Hz, 3 H), 1.20–1.58 (m, 6H), 1.94 (t,  $J = 2.7$  Hz, 1H), 2.11–2.23 (m, 3H), 2.77 (dd,  $J = 15.8, 6.0$  Hz, 1H), 2.95 (dd,  $J = 15.8, 6.0$  Hz, 1H), 7.43–7.50 (m, 2H), 7.53–7.60 (m, 1H), 7.93–7.98 (m, 2H).  $^{13}\text{C}$  NMR ( $\text{CDCl}_3$ )  $\delta$  18.05, 19.69, 25.81, 28.23, 29.30, 36.20, 45.62, 68.16, 84.32, 127.99, 128.47, 132.79, 137.33, 200.21. Anal. Calcd for  $\text{C}_{16}\text{H}_{20}\text{O}$ : C, 84.16; H, 8.83%. Found: C, 83.96; H, 8.90%.

### (*Z*)-*tert*-Butyldimethyl[(3-methyl-1-phenyl-1-nonen-8-yn-1-yl)oxy]silane (1h) (*E/Z* = 13/87)

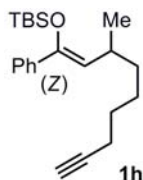

The compound **1h** was prepared according to the procedure for the preparation of **1a**, employing **3h** (257 mg, 1.13 mmol), Et<sub>3</sub>N (0.235 mL, 1.69 mmol), TBSOTf (0.317 mL, 1.35 mmol) in CH<sub>2</sub>Cl<sub>2</sub> (5.6 mL) and hexane/EtOAc (99.5:0.5 to 97:3) as an eluent. Colorless oil (342 mg, 89%, *E/Z* = 13/87). IR (neat) 626, 697, 764, 778, 836, 1062, 1255, 1647, 2858, 2930, 2954, 3313 cm<sup>-1</sup>; <sup>1</sup>H NMR of (*Z*)-**1h** (CDCl<sub>3</sub>) δ -0.10 (s, 3H), -0.03 (s, 3H), 0.98 (s, 9H), 1.01 (d, *J* = 6.6 Hz, 3 H), 1.24–1.58 (m, 6H), 1.93 (t, *J* = 2.7 Hz, 1H), 2.18 (td, *J* = 6.9, 2.7 Hz, 2H), 2.62–2.74 (m, 1H), 4.85 (d, *J* = 9.6 Hz, 1H), 7.17–7.36 (m, 3H), 7.39–7.45 (m, 2H). [(*E*)-**1h**: 4.79 (d, *J* = 10.8 Hz, 1H)]. <sup>13</sup>C NMR of (*Z*)-**1h** (CDCl<sub>3</sub>) δ -4.28, -4.11, 18.13, 18.27, 20.82, 25.80, 26.53, 28.54, 30.08, 37.07, 68.13, 84.48, 118.23, 126.18, 127.40, 127.86, 140.01, 148.62. Anal. Calcd for C<sub>22</sub>H<sub>24</sub>OSi: C, 77.13; H, 10.00%. Found: C, 76.74; H, 10.04%. The geometry of major *Z*-isomer was confirmed by an NOE experiment as shown below.

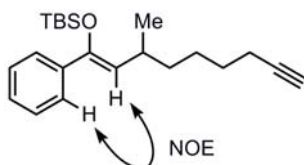

#### Scheme 4. Preparation of **1i**.

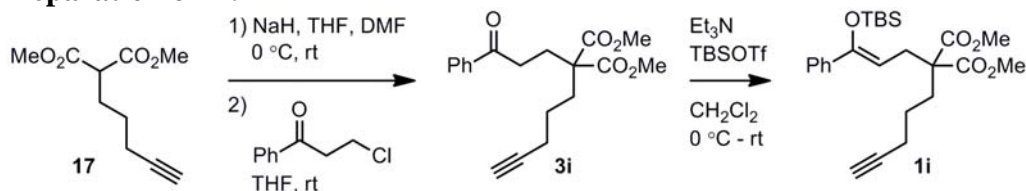

#### Dimethyl 2-(3-Oxo-3-phenylpropyl)-2-(4-pentyn-1-yl)malonate (**3i**)

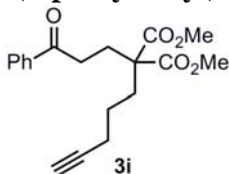

The compound **3i** was prepared according to the procedure for the preparation of **3a**, employing dimethyl 2-(4-pentyn-1-yl)malonate (**17**) (1.13 g, 5.04 mmol), NaH (241 mg, 6.00 mmol), 3-chloro-1-phenyl-1-propanone (1.05 g, 5.99 mmol), NaI (75.1 mg, 0.500 mmol) at 80 °C (reflux) for 11 h. Purification by silica gel chromatography (hexane/EtOAc 95:5 to 80:20) afforded **3i** as a colorless oil (1.17 g, 70%). IR (neat) 689, 1173, 1434, 1448, 1683, 1727, 2953, 3288 cm<sup>-1</sup>; <sup>1</sup>H NMR (CDCl<sub>3</sub>) δ 1.42–1.54 (m, 2H), 1.96 (t, *J* = 2.4 Hz, 1H), 2.03–2.11 (td, *J* = 6.9, 2.4 Hz, 2H), 2.31–2.38 (m, 2H), 2.96–3.03 (m, 2H), 3.74 (s, 6H), 7.44–7.51 (m, 2H), 7.54–7.61 (m, 1H), 7.93–7.98 (m, 2H). <sup>13</sup>C NMR (CDCl<sub>3</sub>) δ 18.43, 23.18, 27.13, 32.73, 33.59, 52.41, 56.66, 68.85, 83.48, 128.06, 128.63, 133.18, 136.68, 171.82, 198.92. HRMS (ESI<sup>+</sup>) Calcd for C<sub>19</sub>H<sub>22</sub>O<sub>5</sub>Na [M+Na]<sup>+</sup>: *m/z* 353.13594. Found: *m/z* 353.13528.

(*Z*)-Dimethyl 2-[3-(*tert*-Butyldimethylsiloxy)-3-phenylallyl]-2-(4-pentyn-1-yl)malonate (**1i**) (*E/Z* = 10/90)



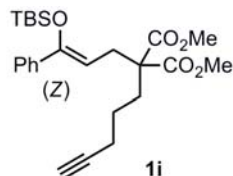

The compound **1i** was prepared according to the procedure for the preparation of **1a**, employing **3i** (609 mg, 1.84 mmol), Et<sub>3</sub>N (0.770 mL, 5.53 mmol), TBSOTf (0.864 mL, 3.68 mmol) in CH<sub>2</sub>Cl<sub>2</sub> (3.7 mL) and hexane/EtOAc (99:1 to 87:13) as an eluent. Colorless oil (781 mg, 87%, *E/Z* = 10/90). IR (neat) 760, 779, 837, 1074, 1254, 1732, 2931, 2953, 2931, 2953, 3308 cm<sup>-1</sup>; <sup>1</sup>H NMR of (*Z*)-**1i** (CDCl<sub>3</sub>) δ -0.06 (s, 3H), 0.99 (s, 9H), 1.42–1.57 (m, 2H), 1.91 (t, *J* = 2.7 Hz, 1H), 1.95–2.02 (m, 2H), 2.18 (td, *J* = 7.2, 2.7 Hz, 2H), 2.84 (d, *J* = 7.5 Hz, 1H), 4.89 (d, *J* = 7.5 Hz, 1H), 7.23–7.31 (m, 3H), 7.36–7.41 (m, 2H). [(*E*)-**1i**: 2.74 (d, *J* = 7.8 Hz, 2H), 4.77 (t, *J* = 7.8 Hz, 1H)]. <sup>13</sup>C NMR of (*Z*)-**1i** (CDCl<sub>3</sub>) δ -4.28, -4.11, 18.13, 18.27, 20.82, 25.80, 26.53, 28.54, 30.08, 37.07, 68.13, 84.48, 118.23, 126.18, 127.40, 127.86, 140.01, 148.62. Anal. Calcd for C<sub>25</sub>H<sub>36</sub>OSi: C, 67.53; H, 8.16%. Found: C, 67.29; H, 8.25%. The geometry of major *Z*-isomer was confirmed by an NOE experiment as shown below.

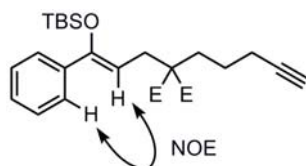

#### Scheme 5. Preparations of **1j** and **1k**.<sup>4</sup>

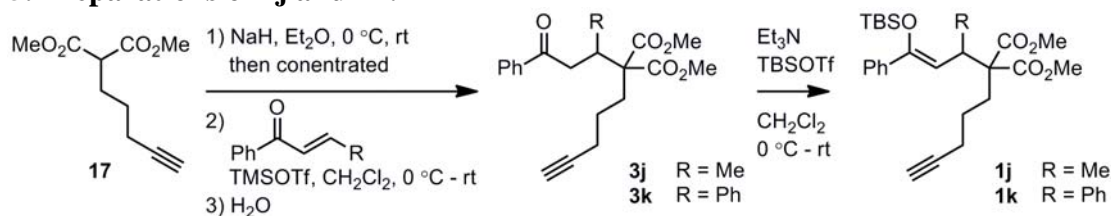

#### Dimethyl 2-(4-Oxo-4-phenyl-2-butanyl)-2-(4-pentyn-1-yl)malonate (**3j**)

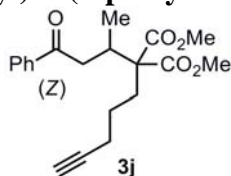

To a suspension of NaH (0.224 g, 5.59 mmol) in Et<sub>2</sub>O (4.6 mL) was added a solution of **17** (1.04 g, 4.59 mmol) in Et<sub>2</sub>O (9.2 mL) at 0 °C under Ar atmosphere. After stirring for 10 min, the reaction mixture was allowed to warm to room temperature and stirred for 1 h. Then, the mixture was concentrated *in vacuo* to remove the solvent, and the reaction vessel was charged with Ar. To the reaction vessel, CH<sub>2</sub>Cl<sub>2</sub> (23 mL), (*E*)-1-phenyl-2-buten-1-one (673 mg, 4.61 mmol) and TMSOTf (1.69 mL, 9.17 mmol) was added in this order at 0 °C, and the mixture was stirred at this temperature for 10 h. The resulting trimethylsilyl enol ether was hydrolyzed with aq NaHCO<sub>3</sub> to **3j**. The organic layer was washed with H<sub>2</sub>O (3 × 10 mL) and separated. The combined aqueous layer was extracted with Et<sub>2</sub>O (3 × 10 mL). The organic layers were combined, dried over MgSO<sub>4</sub>, filtered and concentrated under reduced pressure. The crude product was purified by flash chromatography on silica gel (hexane/EtOAc 95:5 to 80:20) to give **3j** as a colorless oil (1.17 g, 74%). IR (neat) 776, 835, 1186, 1252, 1712, 2933, 2954, 3288 cm<sup>-1</sup>; <sup>1</sup>H NMR (CDCl<sub>3</sub>) δ 0.97 (d, *J* = 6.9 Hz, 3H), 1.42–1.59 (m, 2H), 1.96 (t, *J* = 2.7 Hz, 1H), 2.03–2.11 (m, 2H), 2.21 (td, *J* = 7.2, 2.7 Hz, 2H), 2.82 (dd, *J* = 16.5, 10.5 Hz, 1H), 2.91–3.04 (m, 1H), 3.30 (d, *J* = 16.5 Hz, 1H), 3.75 (s, 3H), 3.79 (s, 3H), 7.43–7.51 (m, 2H), 7.54–7.60 (m, 2H), 7.97–8.03 (m, 2H). <sup>13</sup>C NMR (CDCl<sub>3</sub>) δ 15.26, 18.35, 23.41, 32.41, 32.58, 42.28,



51.93, 52.02, 61.07, 68.76, 83.33, 128.02, 128.46, 132.95, 136.90, 171.00, 171.55, 198.87. HRMS (ESI<sup>+</sup>) Calcd for C<sub>20</sub>H<sub>24</sub>O<sub>5</sub>Na [M+Na]<sup>+</sup>: *m/z* 367.15160. Found: *m/z* 367.15084.

**(Z)-Dimethyl 2-[4-(*tert*-Butyldimethylsiloxy)-4-phenyl-3-buten-2-yl]-2-(4-pentyn-1-yl)malonate (1j)**

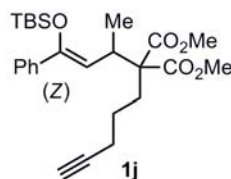

The compound **1j** was prepared according to the procedure for the preparation of **1a**, employing **3j** (996 mg, 2.89 mmol), Et<sub>3</sub>N (1.21 mL, 8.68 mmol), TBSOTf (1.36 mL, 5.80 mmol) in CH<sub>2</sub>Cl<sub>2</sub> (5.8 mL) and hexane/EtOAc (99:1 to 92:8) as the eluent. The further purification was conducted by GPC. Colorless oil (871 mg, 66%). IR (neat) 698, 766, 779, 838, 1062, 1252, 1646, 1727, 2932, 2953, 3310 cm<sup>-1</sup>; <sup>1</sup>H NMR (CDCl<sub>3</sub>) δ -0.15 (s, 3H), 0.01 (s, 3H), 1.00 (s, 9H), 1.12 (d, *J* = 6.9 Hz, 3 H), 1.32–1.50 (m, 1H), 1.62–1.78 (m, 1H), 1.90 (t, *J* = 2.7 Hz, 1H), 1.94–2.02 (m, 2H), 2.16 (td, *J* = 6.9, 2.7 Hz, 2H), 3.49 (dq, *J* = 10.5, 6.9 Hz, 1H), 3.72 (s, 3H), 3.75 (s, 3H), 4.95 (d, *J* = 10.5 Hz, 1H), 7.24–7.32 (m, 3H), 7.35–7.41 (m, 2H). <sup>13</sup>C NMR (CDCl<sub>3</sub>) δ -4.49, -4.08, 17.42, 17.99, 18.60, 23.63, 25.61, 33.93, 34.50, 51.56, 51.83, 61.47, 68.44, 83.63, 111.87, 126.44, 127.76, 127.82, 139.51, 150.51, 171.22, 171.64. HRMS (ESI<sup>+</sup>) Calcd for C<sub>26</sub>H<sub>38</sub>O<sub>5</sub>SiNa [M+Na]<sup>+</sup>: *m/z* 481.23807. Found: *m/z* 481.23699. The geometry of major *Z*-isomer was confirmed by an NOE experiment as shown below.

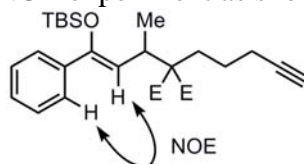

**Dimethyl 2-(3-Oxo-1,3-diphenylpropyl)-2-(4-pentyn-1-yl)malonate (3k)**

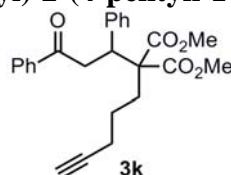

The compound **3k** was prepared according to the procedure for the preparation of **3j**, employing **17** (896 mg, 4.00 mmol), NaH (193 mL, 4.83 mmol), (*E*)-chalcone (836 mg, 4.01 mmol), TMSOTf (1.17 mL, 5.99 mmol) and hexane/EtOAc (90:10 to 80:20) as an eluent. Colorless viscous oil (1.29 g, 79%). IR (neat) 690, 702, 749, 1170, 1213, 1433, 1448, 1597, 1685, 1726, 2951, 3288 cm<sup>-1</sup>; <sup>1</sup>H NMR (CDCl<sub>3</sub>) δ 1.40–1.69 (m, 2H), 1.73 (dd, *J* = 4.8, 12.0 Hz, 1H), 1.84 (dd, *J* = 8.1, 12.0 Hz, 1H), 3.75 (s, 3H), 3.78 (dd, *J* = 17.4 Hz, 10.5 Hz, 1H), 3.80 (s, 3H), 4.17 (dd, *J* = 10.5, 2.7 Hz, 1H), 7.11–7.17 (m, 2H), 7.17–7.26 (m, 3H), 7.38–7.45 (m, 2H), 7.48–7.55 (m, 2H). <sup>13</sup>C NMR (CDCl<sub>3</sub>) δ 18.49, 23.89, 33.65, 41.99, 44.75, 52.18, 52.47, 61.74, 68.69, 83.54, 127.46, 128.13, 128.35, 128.54, 129.08, 132.99, 137.02, 138.94, 171.17, 171.65, 197.96. Anal. Calcd for C<sub>25</sub>H<sub>26</sub>O<sub>5</sub>: C, 73.87; H, 6.45%. Found: C, 73.49; H, 6.57%.

**(Z)-Dimethyl 2-[3-(*tert*-Butyldimethylsiloxy)-1,3-diphenylallyl]-2-(4-pentyn-1-yl)malonate (1k) (*E/Z* = 4/96)**

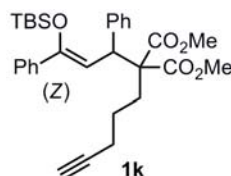

The compound **1k** was prepared according to the procedure for the preparation of **1a**, employing **3k** (1.02 g, 2.50 mmol), Et<sub>3</sub>N (1.05 mL, 7.53 mmol), TBSOTf (1.17 mL, 4.99 mmol) in CH<sub>2</sub>Cl<sub>2</sub> (5.0 mL) and hexane/EtOAc (99.5:0.5 to 97:3) as an eluent. White solid (1.26 mg, 97%, *E/Z* 4:96). IR (neat) 700, 769, 780, 1648, 1722, 1751, 2933, 2954, 3277 cm<sup>-1</sup>; Mp: 71.9–73.0 °C. <sup>1</sup>H NMR of (*Z*)-**1k** (CDCl<sub>3</sub>) δ –0.28 (s, 3H), –0.25 (s, 3H), 0.99 (s, 9H), 1.24–1.43 (m, 1H), 1.60–1.76 (m, 1H), 1.90 (t, *J* = 2.7 Hz, 1H), 1.92–2.11 (m, 2H), 2.15 (br t, *J* = 6.0 Hz, 2H), 3.57 (s, 3H), 3.66 (s, 3H), 4.68 (d, *J* = 10.8 Hz, 1H), 5.68 (d, *J* = 10.8 Hz, 1H), 7.15–7.34 (m, 8H), 7.36–7.42 (m, 2H). [(*E*)-**1k**: δ –0.14 (s, 3H), –0.10 (s, 3H), 1.02 (s, 9H), 5.35 (d, *J* = 10.2 Hz, 1H)]. <sup>13</sup>C NMR of (*Z*)-**1j** (CDCl<sub>3</sub>) δ –4.60, –3.79, 18.12, 18.70, 23.89, 25.75, 34.37, 45.22, 51.72, 51.92, 63.24, 68.48, 83.79, 109.52, 126.80, 127.79, 127.95, 128.01, 129.49, 139.75, 140.51, 150.94, 171.00, 171.12. Anal. Calcd for C<sub>31</sub>H<sub>40</sub>O<sub>5</sub>Si: C, 71.50; H, 7.74%. Found: C, 71.34; H, 7.78%. The geometry of major *Z*-isomer was confirmed by an NOE experiment as shown below.

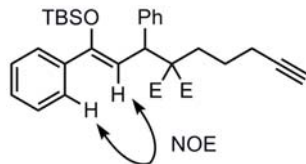

#### Scheme 6. Preparation of **1l**.

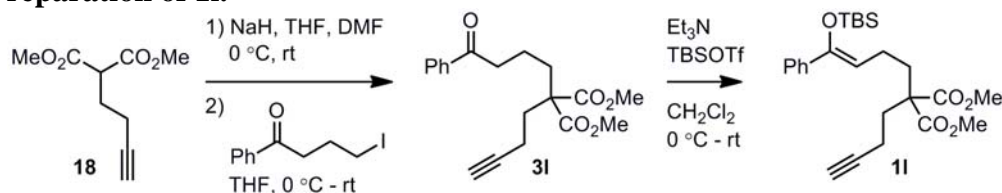

#### Dimethyl 2-(3-Butyn-1-yl)-2-(4-Oxo-4-phenylbutyl)malonate (**3l**)

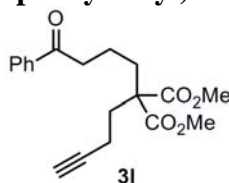

The compound **3l** was prepared according to the procedure for the preparation of **3a**, employing dimethyl 2-(3-butyn-1-yl)malonate (**18**) (1.04 g, 5.01 mmol), NaH (240 mg, 6.00 mmol), 4-iodo-1-phenyl-1-butanone<sup>6</sup> (1.65 g, 6.02 mmol) at room temperature overnight. Purification by silica gel chromatography (hexane/EtOAc 95:5 to 75:25) afforded **3l** as a colorless oil (0.951 g, 57%). IR (neat) 690, 1175, 1199, 1434, 1448, 1683, 1728, 2953, 3289 cm<sup>-1</sup>; <sup>1</sup>H NMR (CDCl<sub>3</sub>) δ 1.57–1.70 (m, 2H), 1.96–2.06 (m, 3H), 2.21–2.24 (m, 4H), 3.01 (t, *J* = 6.9 Hz, 2H), 3.75 (s, 6H), 7.43–7.50 (m, 2H), 7.54–7.60 (m, 1H), 7.93–7.97 (m, 2H). <sup>13</sup>C NMR (CDCl<sub>3</sub>) δ 13.42, 18.07, 30.88, 31.60, 37.71, 52.11, 56.57, 68.65, 82.83, 127.68, 128.36, 132.83, 136.58, 171.22, 198.98. HRMS (ESI<sup>+</sup>) Calcd for C<sub>19</sub>H<sub>22</sub>O<sub>5</sub>Na [M+Na]<sup>+</sup>: *m/z* 353.135894. Found: *m/z* 353.13539.

#### (*Z*)-Dimethyl 2-(3-butyn-1-yl)-2-[4-(*tert*-butyldimethylsiloxy)-4-phenyl-3-buten-1-yl]malonate (**1l**) (*E/Z* = 19/81)

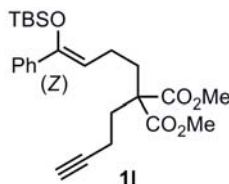

The compound **1l** was prepared according to the procedure for the preparation of **1a**, employing **3l** (724 mg, 2.19 mmol), Et<sub>3</sub>N (0.458 mL, 3.29 mmol), TBSOTf (0.617 mL, 2.63 mmol) in CH<sub>2</sub>Cl<sub>2</sub> (8.8 mL) and hexanes/EtOAc (99/1 to 92/8) as an eluent. Colorless oil (794 mg, 81%, *E/Z* = 19/81). IR

(neat) 697, 758, 779, 838, 1176, 1196, 1253, 1732, 2931, 2954, 3308  $\text{cm}^{-1}$ ;  $^1\text{H}$  NMR of (**Z**)-**11** ( $\text{CDCl}_3$ )  $\delta$  -0.11 (s, 6H), 0.97 (s, 9H), 1.91–2.28 (m, 9H), 3.71 (s, 6H), 4.93–5.05 (m, 1H), 7.19–7.44 (m, 5H).  $^{13}\text{C}$  NMR of (**Z**)-**11** ( $\text{CDCl}_3$ )  $\delta$  -4.36, 13.76, 18.00, 20.82, 25.61, 31.04, 32.21, 52.21, 56.60, 68.72, 82.92, 109.88, 125.80, 127.54, 127.86, 139.36, 150.08, 171.47. HRMS ( $\text{ESI}^+$ ) Calcd for  $\text{C}_{25}\text{H}_{36}\text{O}_5\text{SiNa}$   $[\text{M}+\text{Na}]^+$ :  $m/z$  467.22169. Found:  $m/z$  467.22242. The geometry of major Z-isomer was confirmed by NOE experiment as shown below.

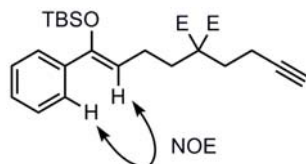

#### Scheme 7. Preparation of (**E**)-**1j**.<sup>4</sup>

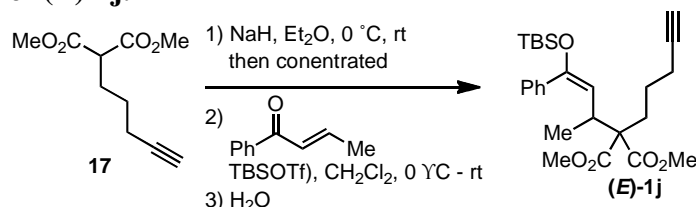

(**E**)-Dimethyl 2-[4-(*tert*-Butyldimethylsiloxy)-4-phenyl-3-buten-2-yl]-2-(4-pentyn-1-yl)malonate [(**E**)-**1j**] (**E**/**Z** = 86/14)

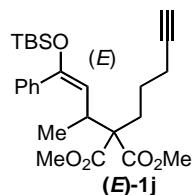

To a suspension of NaH (149 mg, 3.73 mmol) in  $\text{Et}_2\text{O}$  (3 mL) was added a solution of **17** (679 mg, 3.04 mmol) in  $\text{Et}_2\text{O}$  (6 mL) at 0 °C under Ar atmosphere. After stirring for 10 min, the reaction mixture was allowed to warm to room temperature and stirred for 1 h. Then, the mixture was concentrated *in vacuo* to remove the solvent, and the reaction vessel was charged with Ar. To the reaction vessel,  $\text{CH}_2\text{Cl}_2$  (23 mL), (**E**)-1-phenyl-2-buten-1-one (452 mg, 3.09 mmol) and TBSOTf (1.07 mL, 4.56 mmol) was added in this order at -78 °C, and the mixture was allowed to slowly warm to room temperature with stirring for 24 h. The resulting trimethylsilyl enol ether was hydrolyzed with aq  $\text{NaHCO}_3$  to **3j**. The organic layer was washed with  $\text{H}_2\text{O}$  (3  $\times$  10 mL), and separated. The combined aqueous layer was extracted with  $\text{Et}_2\text{O}$  (3  $\times$  10 mL). The organic layers were combined, dried over  $\text{MgSO}_4$ , filtered and concentrated under reduced pressure. The crude product was purified by flash chromatography on silica gel (hexane/ $\text{EtOAc}$  99.5:0.5 to 92:8) and GPC to give (**E**)-**1j** as a colorless oil (735 g, 53%). IR (neat) 699, 778, 836, 1252, 1646, 1728, 2931, 2953, 3310  $\text{cm}^{-1}$ ;  $^1\text{H}$  NMR ( $\text{CDCl}_3$ )  $\delta$  0.05 (s, 3H), 0.08 (s, 3H), 0.88 (s, 9H), 1.04–1.22 (m, 2H), 1.15 (d,  $J$  = 6.9 Hz, 3H), 1.75–1.91 (m, 2H), 1.90 (t,  $J$  = 2.7 Hz, 1H), 2.04 (td,  $J$  = 7.2, 2.7 Hz, 2H), 2.96–3.08 (m, 1H), 3.68 (s, 3H), 3.71 (s, 3H), 4.90 (d,  $J$  = 11.4 Hz, 1H), 7.22–7.38 (m, 5H).  $^{13}\text{C}$  NMR ( $\text{CDCl}_3$ )  $\delta$  -4.82, -4.49, 17.96, 18.51, 18.62, 23.49, 25.55, 33.87, 36.34, 51.74, 51.91, 61.64, 68.45, 83.63, 110.56, 128.01, 128.05, 128.07, 137.75, 151.25, 171.16, 171.47. HRMS ( $\text{ESI}^+$ ) Calcd for  $\text{C}_{26}\text{H}_{38}\text{O}_5\text{SiNa}$   $[\text{M}+\text{Na}]^+$ :  $m/z$  481.23807. Found:  $m/z$  481.23733.

#### Scheme 8. Preparation of **1m**.

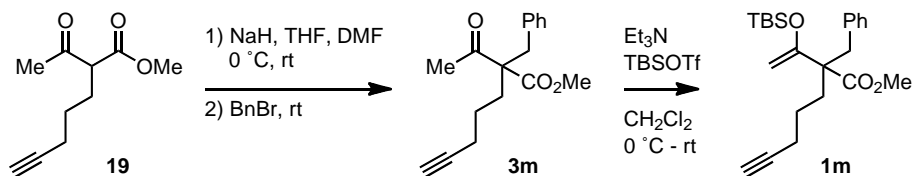

### Methyl 2-Acetyl-2-benzyl-6-heptynoate (3m)

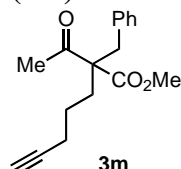

The compound **3m** was prepared according to the procedure for the preparation of **3a**, employing methyl 2-acetyl-6-heptynoate (**19**) (729 mg, 4.00 mmol), NaH (192 mg, 4.80 mmol), benzyl bromide (0.582 mL, 4.80 mmol) at room temperature for 20 min. Purification by silica gel chromatography (hexane/EtOAc 99:1 to 85:15) afforded **3m** as a colorless oil (0.834 g, 88%). IR (neat) 635, 701, 1176, 1433, 1455, 1709, 1742, 2952, 3289  $\text{cm}^{-1}$ ;  $^1\text{H}$  NMR ( $\text{CDCl}_3$ )  $\delta$  1.23–1.45 (m, 1H), 1.45–1.61 (m, 1H), 1.87–1.97 (m, 2H), 1.96 (t,  $J = 2.7$  Hz, 1H), 2.12 (s, 3H), 2.15–2.23 (m, 2H), 3.12 (d,  $J = 14.4$ , 1H), 3.23 (d,  $J = 14.4$ , 1H), 3.72 (s, 3H), 7.02–7.07 (m, 2H), 7.18–7.28 (m, 3H).  $^{13}\text{C}$  NMR ( $\text{CDCl}_3$ )  $\delta$  18.27, 22.82, 26.89, 30.15, 37.08, 51.96, 64.32, 68.92, 83.25, 126.81, 128.22, 129.67, 136.05, 172.17, 204.60. Anal. Calcd for  $\text{C}_{17}\text{H}_{20}\text{O}_3$ : C, 74.97; H, 7.40%. Found: C, 74.74; H, 7.43%.

### Methyl 2-Benzyl-2-[1-(*tert*-butyldimethylsiloxy)vinyl]-6-heptynoate (1m)

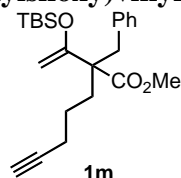

The compound **1m** was prepared according to the procedure for the preparation of **1a**, employing **3m** (732 mg, 2.69 mmol),  $\text{Et}_3\text{N}$  (0.749 mL, 5.37 mmol), TBSOTf (0.945 mL, 4.03 mmol) in  $\text{CH}_2\text{Cl}_2$  (5.4 mL) and hexane/EtOAc (99.5:0.5 to 94:6) as an eluent. White solid (959 mg, 92%). Mp = 47.2–50.4  $^\circ\text{C}$ . IR (neat) 829, 992, 1274, 1633, 1725, 2931, 2948, 3277  $\text{cm}^{-1}$ ;  $^1\text{H}$  NMR ( $\text{CDCl}_3$ )  $\delta$  0.19 (s, 3H), 0.24 (s, 3H), 0.91 (s, 9H), 1.38–1.51 (m, 1H), 1.59–1.68 (m, 3H), 1.95 (t,  $J = 2.7$  Hz, 1H), 2.15–2.21 (m, 2H), 3.09 (s, 2H), 3.67 (s, 3H), 4.05 (d,  $J = 2.4$  Hz, 1H), 4.17 (d,  $J = 2.4$  Hz, 1H), 7.07–7.12 (m, 2H), 7.17–7.25 (m, 3H).  $^{13}\text{C}$  NMR ( $\text{CDCl}_3$ )  $\delta$  -5.56, -4.97, 17.79, 18.53, 23.48, 25.33, 30.09, 37.03, 51.59, 56.82, 68.57, 83.93, 89.80, 126.50, 127.86, 130.21, 137.05, 158.19, 174.15. HRMS (ESI $^+$ ) Calcd for  $\text{C}_{23}\text{H}_{34}\text{O}_3\text{Si}$  [ $\text{M}$ ] $^+$ :  $m/z$  409.21694. Found:  $m/z$  409.21632.

### Scheme 9. Preparation of 1n.

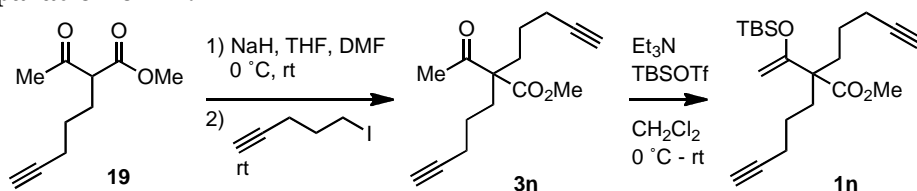

### Methyl 2-[1-(*tert*-Butyldimethylsiloxy)vinyl]-2-(4-pentyn-1-yl)-6-heptynoate (1n)

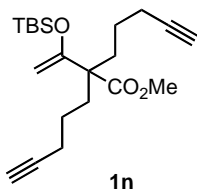

The compound **3n** was prepared according to the procedure for the preparation of **3a**, employing methyl 2-acetyl-6-heptanoate (**20**) (929 mg, 5.10 mmol), NaH (245 mg, 6.13 mmol), 5-iodo-1-hexyne (1.52 g, 7.65 mmol) at room temperature overnight. Purification by silica gel chromatography (hexanes/EtOAc 98:2 to 75:25) afforded **3n** as a mixture of a small amount of a *O*-alkylation by-product (colorless oil, 917 mg, ca 73%). <sup>1</sup>H NMR (CDCl<sub>3</sub>) δ 1.22–1.46 (m, 4H), 1.97–2.04 (m, 6H), 2.15 (s, 3H), 2.17–2.25 (m, 4H), 3.75 (s, 3H). Then silyl enolization of **3n** took place by using the procedure for the preparation **3a**, employing **3n** (917 mg, 3.69 mmol), Et<sub>3</sub>N (0.772 mL, 5.54 mmol), TBSOTf (1.04 mL, 4.43 mmol) in CH<sub>2</sub>Cl<sub>2</sub> (7.4 mL) and hexane/EtOAc (99.5/0.5 to 97/3) as the eluent. Colorless oil (887 mg, 48% from **19**). IR (neat) 626, 827, 1020, 1172, 1254, 1625, 1735, 2932, 2951, 3309 cm<sup>-1</sup>; <sup>1</sup>H NMR (CDCl<sub>3</sub>) δ 0.17 (s, 6H), 0.88 (s, 9H), 1.20–1.40 (m, 2H), 1.40–1.53 (m, 2H), 1.80–1.87 (m, 4H), 3.66 (s, 3H), 4.19 (q, *J* = 2.1 Hz, 2H). <sup>13</sup>C NMR (CDCl<sub>3</sub>) δ -5.27, 17.74, 18.60, 23.04, 25.30, 30.58, 51.70, 55.40, 68.52, 83.99, 89.12, 158.62, 174.63. Anal. Calcd for C<sub>21</sub>H<sub>34</sub>O<sub>3</sub>Si: C, 69.56; H, 9.45%. Found: C, 69.56; H, 9.59%.

## Cyclization Products.

### Ethyl *cis*-5-Methylene-10-oxobicyclo[4.3.1]decane-1-carboxylate (**2a**)

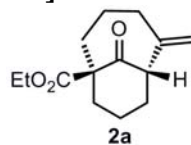

Colorless oil. IR (neat) 1175, 1232, 1704, 1732, 2935 cm<sup>-1</sup>; <sup>1</sup>H NMR (CDCl<sub>3</sub>) δ 1.28 (t, *J* = 7.2 Hz, 3H), 1.61–2.26 (m, 10H), 2.36–2.49 (m, 2H), 3.34 (br s, 1H), 4.20 (q, *J* = 7.2 Hz, 2H), 4.93 (s, 1H), 5.03 (s, 1H). <sup>13</sup>C NMR (CDCl<sub>3</sub>) δ 13.78, 17.89, 23.66, 31.76, 34.00, 35.08, 35.26, 55.08, 60.85, 60.94, 112.50, 145.33, 173.58, 211.03. Anal. Calcd for C<sub>14</sub>H<sub>20</sub>O<sub>3</sub>: C, 71.16; H, 8.53%. Found: C, 70.85; H, 86.68%.

### *cis*-1-benzoyl-5-methylenebicyclo[4.3.1]decan-10-one (**2c**)

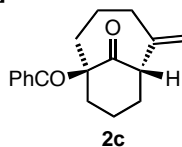

Colorless oil. IR (neat) 1230, 1446, 1677, 1697, 2932 cm<sup>-1</sup>; <sup>1</sup>H NMR (CDCl<sub>3</sub>) δ 1.72–1.83 (m, 1 H), 1.84–1.96 (m, 3H), 2.05–2.20 (m, 4H), 2.23–2.40 (m, 2 H), 2.40–2.55 (m, 2 H), 3.61 (br s, 1H), 4.96 (s, 1H), 5.10 (s, 1H), 7.36–7.49 (m, 2H), 7.45–7.52 (m, 1H), 7.66–7.71 (m, 2H). <sup>13</sup>C NMR (CDCl<sub>3</sub>) δ 18.79, 24.67, 32.46, 35.24, 36.33, 37.63, 54.61, 63.53, 113.17, 128.23, 129.50, 131.96, 135.10, 146.04, 201.06, 213.17. HRMS (ESI<sup>+</sup>) Calcd for C<sub>18</sub>H<sub>20</sub>O<sub>2</sub> [M+Na]<sup>+</sup>: *m/z* 291.13555. Found: *m/z* 291.13523.

### Methyl *cis*-5-Methylene-9-oxobicyclo[4.2.1]nonane-1-carboxylate (**2d**)

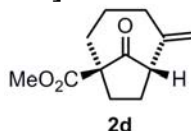

Colorless oil. IR (neat) 1174, 1208, 1268, 1243, 1727, 1749, 2935, 2949 cm<sup>-1</sup>; <sup>1</sup>H NMR (CDCl<sub>3</sub>) δ

1.69–1.99 (m, 4H), 2.02–2.20 (m, 3H), 2.35–2.61 (m, 3H), 3.34 (dd,  $J = 8.7, 2.1$  Hz, 1H), 3.74 (s, 3H), 4.81 (s, 1H), 4.89 (s, 1H).  $^{13}\text{C}$  NMR ( $\text{CDCl}_3$ )  $\delta$  23.78, 28.19, 29.31, 34.31, 34.89, 52.45, 54.48, 60.14, 111.38, 146.20, 173.05, 214.61. HRMS ( $\text{EI}^+$ ) Calcd for  $\text{C}_{12}\text{H}_{16}\text{O}_3$   $[\text{M}]^+$ :  $m/z$  208.10994. Found:  $m/z$  208.10967.

**Methyl *cis*-5-Methylene-11-oxobicyclo[4.4.1]undecane-1-carboxylate (2e)**

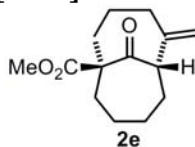

Colorless oil. IR (neat) 901, 1210, 1690, 1728, 2925, 2950  $\text{cm}^{-1}$ ;  $^1\text{H}$  NMR ( $\text{CDCl}_3$ )  $\delta$  1.45–1.55 (m, 1H), 1.68–2.20 (m, 12H), 2.45–2.55 (m, 1H), 3.46–3.58 (m, 1H), 3.73 (s, 3H), 4.91 (s, 1H), 4.93 (s, 1H), 5.00 (s, 1H).  $^{13}\text{C}$  NMR ( $\text{CDCl}_3$ )  $\delta$  24.71, 25.55, 25.69, 27.91, 30.73, 33.20, 36.23, 52.01, 61.79, 64.39, 113.20, 144.54. HRMS ( $\text{EI}^+$ ) Calcd for  $\text{C}_{14}\text{H}_{20}\text{O}_3$   $[\text{M}]^+$ :  $m/z$  236.14124. Found:  $m/z$  236.14115.

**Methyl *cis*-8-Methylene-12-oxobicyclo[5.4.1]dodecane-1-carboxylate (2f)**

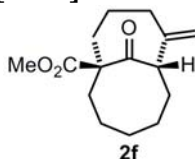

Colorless oil. IR (neat) 1220, 1241, 1438, 1683, 1731, 2929  $\text{cm}^{-1}$ ;  $^1\text{H}$  NMR ( $\text{CDCl}_3$ )  $\delta$  1.17–1.34 (m, 1H), 1.40–1.56 (m, 1H), 1.56–1.99 (m, 9H), 2.03–2.14 (m, 1H), 2.03–2.14 (m, 1H), 2.30–2.56 (m, 4H), 3.34 (dd,  $J = 9.0, 4.2$ , 1H), 3.71 (s, 3H), 4.94 (s, 1H), 4.97 (s, 1H).  $^{13}\text{C}$  NMR ( $\text{CDCl}_3$ )  $\delta$  23.06, 23.82, 24.77, 25.11, 30.08, 34.44, 34.68, 35.82, 51.88, 62.75, 63.35, 112.99, 145.77, 173.83, 213.61. HRMS ( $\text{EI}^+$ ) Calcd for  $\text{C}_{15}\text{H}_{22}\text{O}_3$   $[\text{M}]^+$ :  $m/z$  250.15689. Found:  $m/z$  250.15707.

**2-Benzoyl-1-methylenecycloheptane (2g)**

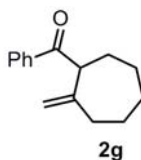

Colorless oil. IR (neat) 689, 1206, 1446, 1677, 2853, 2924  $\text{cm}^{-1}$ ;  $^1\text{H}$  NMR ( $\text{CDCl}_3$ )  $\delta$  1.31–1.57 (m, 3H), 1.71–1.95 (m, 4H), 1.96–2.07 (m, 1H), 2.31–2.52 (m, 2H), 4.15 (dd,  $J = 10.8, 4.8$ , 1H), 4.72 (s, 1H), 4.89 (s, 1H), 7.40–7.47 (m, 2H), 7.50–7.57 (m, 1H), 7.91–7.97 (m, 2H).  $^{13}\text{C}$  NMR ( $\text{CDCl}_3$ )  $\delta$  27.43, 28.53, 29.46, 30.69, 35.24, 52.54, 114.69, 128.53 (2C), 132.72, 136.83, 149.57, 201.40. HRMS ( $\text{EI}^+$ ) Calcd for  $\text{C}_{15}\text{H}_{18}\text{O}$   $[\text{M}]^+$ :  $m/z$  214.13576. Found:  $m/z$  214.13583.

***trans*-1-Benzoyl-7-methyl-2-methylenecycloheptane (2h)**

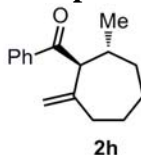

Colorless oil. IR (neat) 697, 1206, 1446, 1675, 2853, 2922  $\text{cm}^{-1}$ ;  $^1\text{H}$  NMR ( $\text{CDCl}_3$ )  $\delta$  0.91 (d,  $J = 6.6$  Hz, 3H), 1.34–1.69 (m, 4H), 1.71–1.89 (m, 2H), 2.18–2.27 (m, 1H), 2.30–2.40 (m, 1H), 2.41–2.52 (m, 1H), 3.94 (d,  $J = 9.9$  Hz, 1H), 4.78 (s, 1H), 4.87 (s, 1H), 7.42–7.49 (m, 2H), 7.51–7.58 (m, 1H), 7.94–8.00 (m, 2H).  $^{13}\text{C}$  NMR ( $\text{CDCl}_3$ )  $\delta$  22.37, 27.96, 31.52, 34.47, 34.98, 35.30, 60.71, 115.43, 128.54, 128.60, 132.72, 137.52, 148.42, 201.03. Anal. Calcd for  $\text{C}_{16}\text{H}_{20}\text{O}$ : C, 84.16; H, 8.83%. Found: C, 83.94; H, 8.93%. HRMS ( $\text{EI}^+$ ) Calcd for  $\text{C}_{16}\text{H}_{20}\text{O}$   $[\text{M}]^+$ :  $m/z$  228.15142. Found:  $m/z$  228.15135. The



relative configuration of Bz and Me group was determined by comparing the coupling constant between H<sub>a</sub> and H<sub>b</sub> and that in the compound **2k**.

**Dimethyl *trans*-3-Benzoyl-4-methylenecycloheptane-1,1-dicarboxylate (**2i**)**

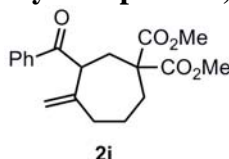

Colorless oil. IR (neat) 690, 1207, 1225, 1239, 1681, 1728, 2952 cm<sup>-1</sup>; <sup>1</sup>H NMR (CDCl<sub>3</sub>) δ 1.52–1.70 (m, 1H), 1.87–2.03 (m, 2H), 2.11 (dd, *J* = 14.4 Hz, 11.4 Hz, 1H), 2.30–2.47 (m, 2H), 2.47–2.58 (m, 1H), 2.73 (ddd, *J* = 14.4, 3.0, 1.5 Hz, 1H), 3.71 (s, 3H), 3.75 (s, 3H), 4.39 (dd, *J* = 11.4, 3.0 Hz, 1H), 4.72 (s, 1H), 4.87 (s, 1H), 7.40–7.47 (m, 2H), 7.51–7.58 (m, 1H), 7.89–7.94 (m, 2H). <sup>13</sup>C NMR (CDCl<sub>3</sub>) δ 22.67, 31.78, 34.75, 36.17, 47.93, 52.41, 52.69, 57.16, 115.34, 128.53, 128.56, 132.93, 136.33, 147.65, 172.04, 172.88, 199.81. HRMS (EI<sup>+</sup>) Calcd for C<sub>19</sub>H<sub>22</sub>O<sub>5</sub> [M]<sup>+</sup>: *m/z* 330.14672. Found: *m/z* 330.14679.

**Dimethyl *trans*-3-Benzoyl-2-methyl-4-methylenecycloheptane-1,1-dicarboxylate (**2j**)**

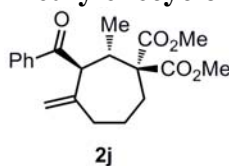

White solid (recrystallization from hot hexane gave a colorless crystalline). IR (neat) 699, 1245, 1672, 1724, 1743, 2939, 2956 cm<sup>-1</sup>; Mp = 47.2–50.4 °C. <sup>1</sup>H NMR (CDCl<sub>3</sub>) δ 1.04 (d, *J* = 6.6 Hz, 3H), 1.40–1.58 (m, 1H), 1.88–2.00 (m, 1H), 2.01–2.15 (m, 2H), 2.27 (td, *J* = 12.6, 3.0 Hz, 1H), 2.37 (dt, *J* = 14.4, 4.2 Hz, 1H), 3.04 (dq, *J* = 10.5, 6.6 Hz, 1H, –CH<sub>a</sub>(Me)–), 3.73 (s, 3H), 3.76 (s, 3H), 4.69 (d, *J* = 10.5 Hz, 1H, –CH<sub>b</sub>(Bz)–), 4.84 (s, 1H), 4.88 (s, 1H), 7.42–7.49 (m, 2H), 7.52–7.59 (m, 1H), 7.98–8.04 (m, 2H). <sup>13</sup>C NMR (CDCl<sub>3</sub>) δ 17.90, 28.69, 31.47, 37.00, 38.88, 51.78, 52.30, 59.05, 61.38, 118.46, 128.61, 128.84, 133.04, 136.90, 146.67, 171.04, 173.05, 199.60. Anal. Calcd for C<sub>20</sub>H<sub>24</sub>O<sub>5</sub>: C, 69.75; H, 7.02%. Found: C, 69.76; H, 7.08%. The relative configuration of Bz and Me group was determined by comparing the coupling constant between H<sub>a</sub> and H<sub>b</sub> and that in the compound **2k**.

**Dimethyl *trans*-3-Benzoyl-4-methylene-2-phenylcycloheptane-1,1-dicarboxylate (**2k**)**

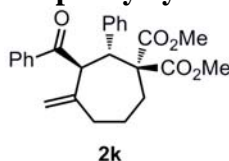

White solid. IR (neat) 700, 1246, 1672, 1725, 1744, 2939, 2955 cm<sup>-1</sup>; Mp = 150.5–151.0 °C. <sup>1</sup>H NMR (CDCl<sub>3</sub>) δ 1.47 (distorted qt, *J* = 13.2, 3.6 Hz, 1H), 2.01–2.11 (m, 1H), 2.16–2.25 (m, 1H), 2.32 (td, *J* = 13.8, 4.5 Hz, 1H), 2.43–2.57 (m, 2H), 3.13 (s, 3H), 3.76 (s, 3H), 4.12 (d, *J* = 11.4 Hz, 1H, –CH<sub>a</sub>(Ph)–), 4.91 (s, 1H), 4.95 (s, 1H), 5.46 (d, *J* = 11.4 Hz, 1H, –CH<sub>b</sub>(Bz)–), 7.02–7.08 (m, 1H), 7.11–7.18 (m, 2H), 7.28–7.35 (m, 2H), 7.39–7.45 (m, 1H), 7.60 (br s, 2H), 7.72–7.77 (m, 2H). <sup>13</sup>C NMR (CDCl<sub>3</sub>) δ 29.27, 31.73, 38.37, 51.83, 51.92, 52.06, 58.03, 63.09, 118.90, 127.09, 127.92, 128.32, 128.62, 130.51, 132.62, 132.64, 140.05, 146.69, 171.12, 171.72, 199.03. Anal. Calcd for C<sub>25</sub>H<sub>26</sub>O<sub>5</sub>: C, 73.87; H, 6.45%. Found: C, 73.86; H, 6.47%. The relative configuration was determined by X-ray analysis as shown below. X-ray quality crystals were grown from hot hexane. Crystallographic data for the structure has been deposited at the Cambridge Crystallographic Data Centre (CCDC 787890). Copies of the data can be obtained, free of charge, on application to the Director, CCDC, 12 Union Road, Cambridge CB2 1EZ, UK. Fax: 44-1223-3360033 or E-mail: [deposit@ccdc.cam.ac.uk](mailto:deposit@ccdc.cam.ac.uk)

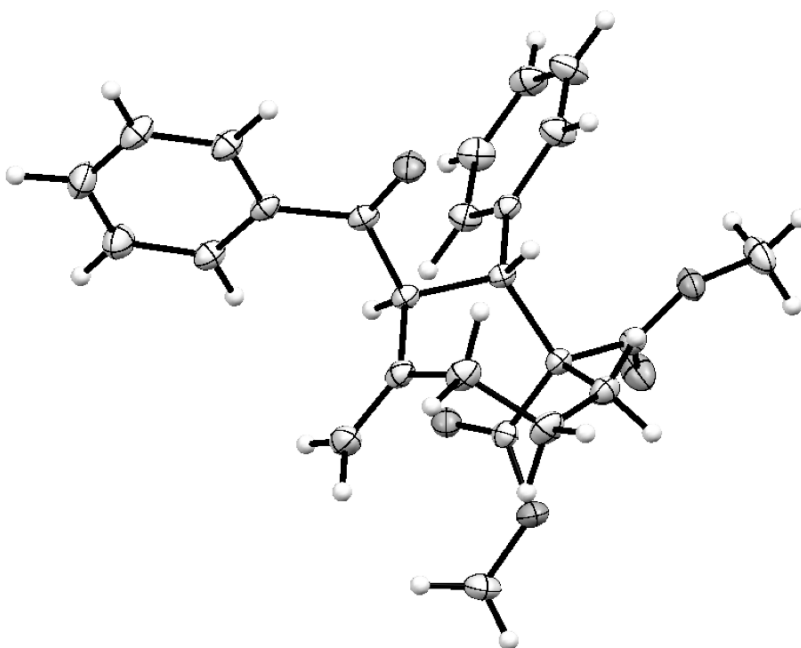

**Dimethyl 5-Benzoyl-4-methylenecycloheptane-1,1-dicarboxylate (2l)**

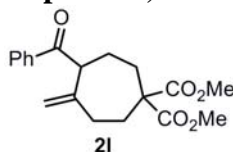

Colorless oil. IR (neat) 691, 1169, 1209, 1237, 1677, 1728, 2953  $\text{cm}^{-1}$ ;  $^1\text{H}$  NMR ( $\text{CDCl}_3$ )  $\delta$  1.83–2.07 (m, 4H), 2.39–2.63 (m, 4H), 3.72 (s, 3H), 3.76 (s, 3H), 4.25 (dd,  $J = 9.3, 5.7$  Hz, 1H), 4.77 (s, 1H), 4.96 (s, 1H), 7.42–7.50 (m, 2H), 7.52–7.59 (m, 2H), 7.90–7.96 (m, 2H).  $^{13}\text{C}$  NMR ( $\text{CDCl}_3$ )  $\delta$  25.27, 31.12, 31.15, 34.92, 51.94, 52.49, 52.61, 57.79, 116.04, 128.59, 128.63, 132.99, 136.49, 147.85, 171.82, 173.04, 200.58. HRMS ( $\text{EI}^+$ ) Calcd for  $\text{C}_{19}\text{H}_{22}\text{O}_5$   $[\text{M}]^+$ :  $m/z$  330.14672. Found:  $m/z$  330.14672.

**Methyl 1-Benzyl-4-methylene-2-oxocycloheptanecarboxylate (2m)**

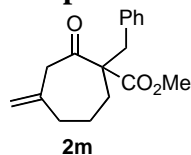

Colorless oil. IR (neat) 691, 1169, 1209, 1237, 1677, 1728, 2953  $\text{cm}^{-1}$ ;  $^1\text{H}$  NMR ( $\text{CDCl}_3$ )  $\delta$  1.62–1.83 (m, 3H), 2.00–2.10 (m, 1H), 2.32–2.42 (m, 1H), 2.97 (d,  $J = 13.5$  Hz, 1H), 3.10 (d,  $J = 14.7$  Hz, 1H), 3.32 (d,  $J = 13.5$  Hz, 1H), 3.44 ( $J = 14.7$ , 1H), 3.60 (s, 3H), 4.87 (s, 1H), 4.90 (s, 1H), 7.05–7.10 (m, 2H), 7.20–7.28 (m, 3H).  $^{13}\text{C}$  NMR ( $\text{CDCl}_3$ ) 25.06, 32.75, 36.52, 41.65, 51.52, 51.93, 63.84, 116.10, 126.86, 128.12, 130.41, 136.60, 141.78, 171.92, 206.21. Anal. Calcd for  $\text{C}_{17}\text{H}_{20}\text{O}_3$ : C, 74.94; H, 7.40%. Found: C, 74.88; H, 7.42%.

**Methyl 4-Methylene-2-oxo-1-(4-pentyn-1-yl)cycloheptanecarboxylate (2n)**

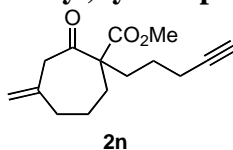

Colorless oil. IR (neat) 637, 1172, 1214, 1434, 1701, 1738, 2948, 3288  $\text{cm}^{-1}$ ;  $^1\text{H}$  NMR ( $\text{CDCl}_3$ )  $\delta$

1.34–1.54 (m, 2H), 1.58–1.93 (m, 4H), 1.95 (t,  $J = 2.7$  Hz), 1.96–2.28 (m, 5H), 2.32–2.43 (m, 1H), 3.21 (d,  $J = 15.0$  Hz, 1H), 3.46 (d,  $J = 15.0$  Hz, 1H), 3.70 (d,  $J = 15.0$  Hz, 1H), 3.70 (s, 3H), 4.89 (s, 1H), 4.94 (s, 1H).  $^{13}\text{C}$  NMR ( $\text{CDCl}_3$ ) 18.61, 23.56, 25.15, 33.50, 35.13, 36.59, 51.30, 52.12, 62.07, 68.59, 83.80, 116.22, 141.98, 172.53, 206.41. HRMS ( $\text{EI}^+$ ) Calcd for  $\text{C}_{15}\text{H}_{20}\text{O}_3\text{Na}$   $[\text{M}+\text{Na}]^+$ :  $m/z$  248.14124. Found:  $m/z$  248.14087.

## References

- 1) Ochida, A.; Ito, H.; Sawamura, M. *J. Am. Chem. Soc.* **2006**, *128*, 16486–16487.
- 2) Williams, D. B.; Stoll, M. E.; Scott, B. L.; Costa, D. A.; Oldham, W. J. Jr. *Chem. Commun.* **2005**, 1438–1440.
- 3) Barabé, F.; Bétournay, G.; Bellavance, G.; Barriault, L. *Org. Lett.* **2009**, *11*, 4236–4238.
- 4) (a) Kusama, H.; Yamabe, H.; Onizawa, Y.; Hoshino, T.; Iwasawa, N. *Angew. Chem. Int. Ed.* **2005**, *44*, 468–470. (b) Kusama, H.; Onizawa, Y.; Iwasawa, N. *J. Am. Chem. Soc.* **2006**, *128*, 16500–16501. (c) Kusama, H.; Karibe, Y.; Onizawa, Y.; Iwasawa, N. *Angew. Chem. Int. Ed.* **2010**, *49*, 4269–4272.
- 5) Van der Louw, J.; Komen, C. M. D.; Knol, A.; De Kanter, F. J.; Van der Bann, J.; Bickelhaupt, F.; Klumpp, G. W.. *Tetrahedron Lett.* **1989**, *30*, 4453–4456.
- 6) Zhou, J.; Fu, G. C.; *J. Am. Chem. Soc.* **2003**, *125*, 14726–14727.

Original File: Jun 29 10  
 Date  
 Comment  
 STANDARD 1H OBSERVE  
 ObsMod 1H  
 ExMode NMR  
 ObsFreq 299.96 MHz  
 ObsSet -1.0 kHz  
 ObsFine 995.0047 Hz  
 Point 16384  
 Frequency(Span) 4500.45 Hz  
 Scan 16  
 AcqTime 3.4983 s  
 PD 1.502 s  
 Pulse1 6.0  $\mu$ s  
 Temperature 29.0  $^{\circ}$ C  
 Solvent CDCl<sub>3</sub>  
 Reference 0.0 ppm  
 Broad.Factor 0.1373 Hz  
 RGain 29  
 Printed 2010/Jul/29 21:00:42  
 Operator

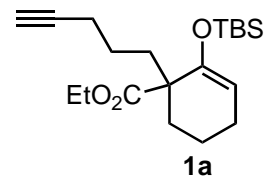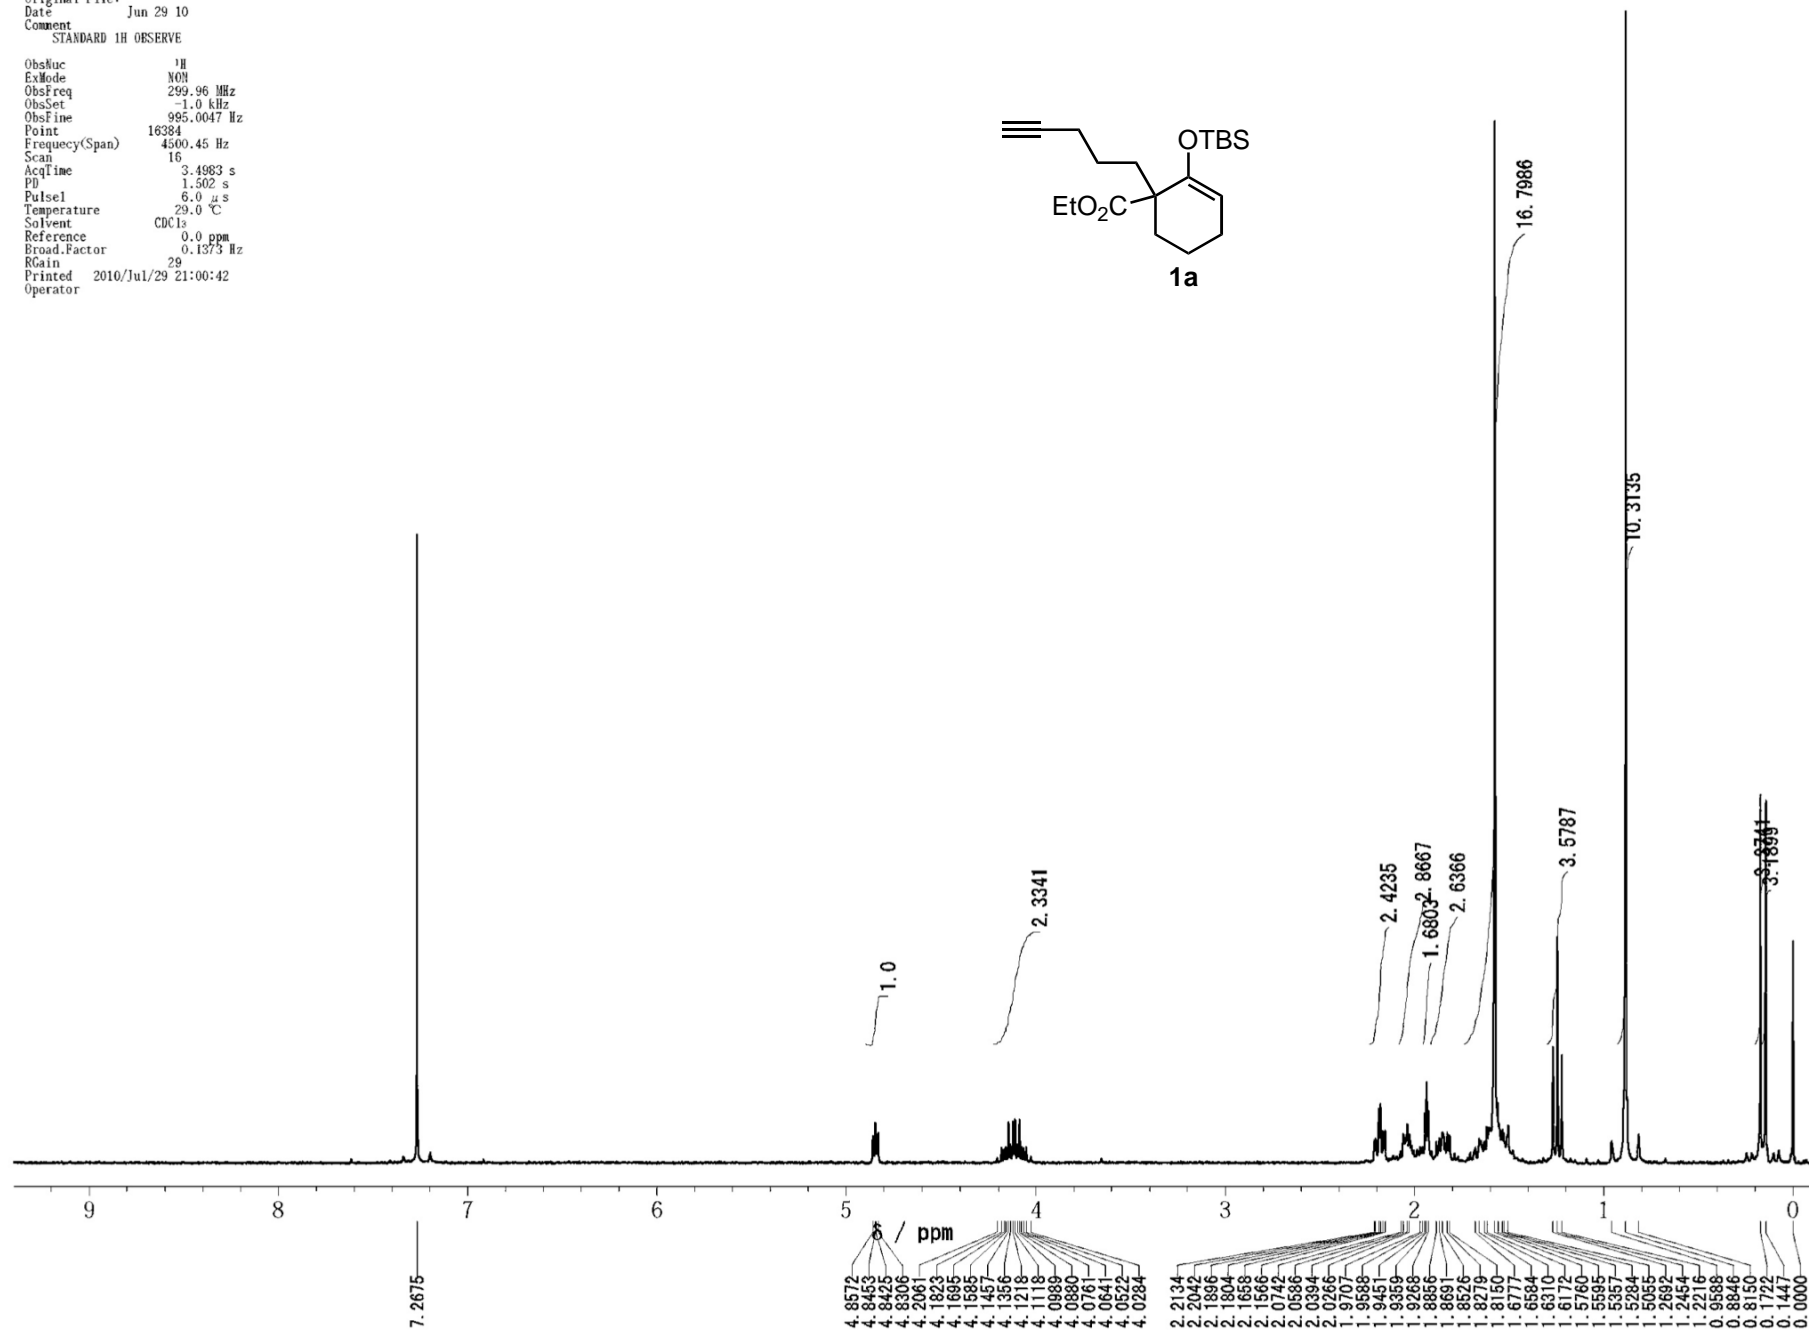

Original File:  
 Date Jun 29 10  
 Comment C13 Standard Observe  
 Stick=none Tune=6.4 Match=0.4  
 ObsRoc 13C  
 ExMode NOM  
 ObsFreq 75.43 MHz  
 ObsSet -1.0 kHz  
 ObsFine 996.3672 Hz  
 Point 32768  
 Frequency(Span) 18761.73 Hz  
 Scan 112  
 AcqTime 1.4992 s  
 PD 1.501 s  
 Pulse 6.0  $\mu$ s  
 Temperature 29.0  $^{\circ}$ C  
 Solvent CDCl<sub>3</sub>  
 Reference 77.0 ppm  
 Broad.Factor 0.2863 Hz  
 RGain 30  
 Printed 2010/Jul/29 21:02:10  
 Operator

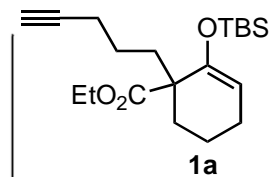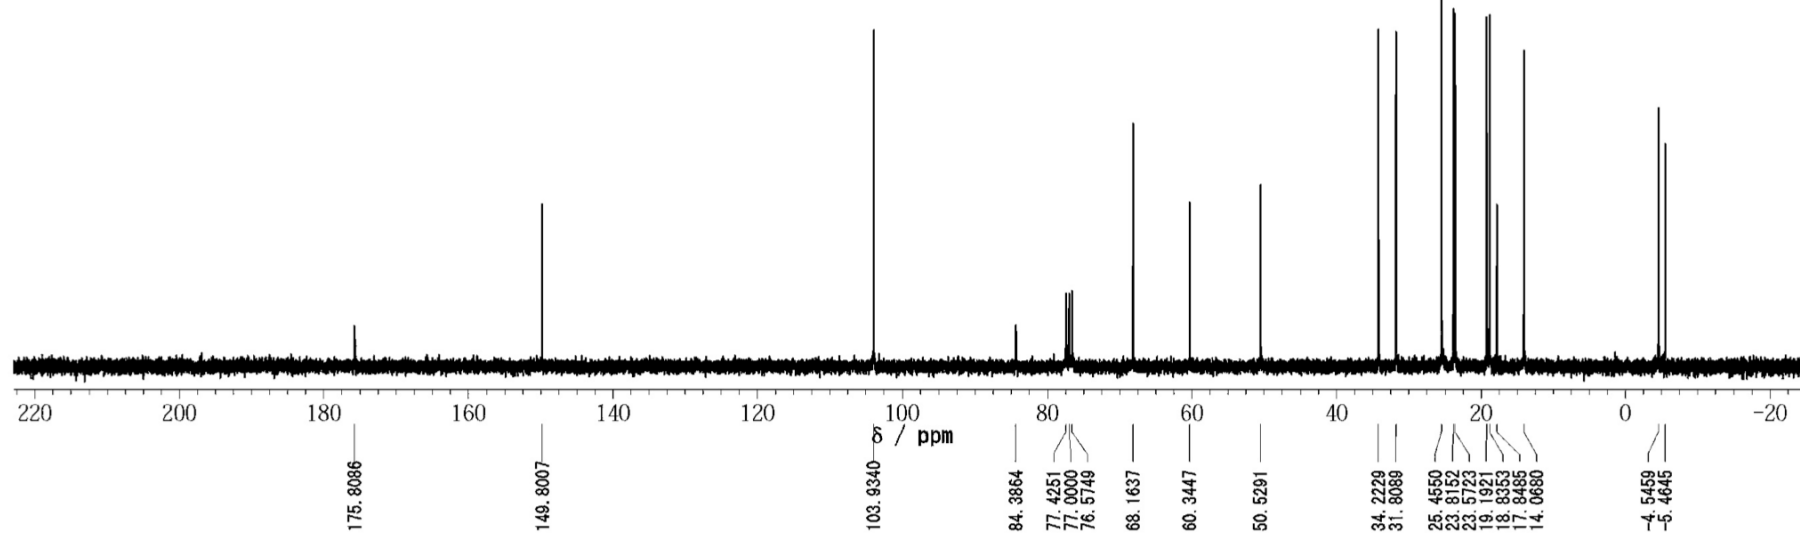

Original File: Jul 6 10  
 Date  
 Comment  
 STANDARD 1H OBSERVE  
 ObsMod 1H  
 ExMode NMR  
 ObsFreq 299.96 MHz  
 ObsSet -1.0 kHz  
 ObsFine 995.0047 Hz  
 Point 16384  
 Frequency(Span) 4500.45 Hz  
 Scan 32  
 AcqTime 3.4983 s  
 PD 1.502 s  
 Pulse1 6.0  $\mu$ s  
 Temperature 29.0  $^{\circ}$ C  
 Solvent CDCl<sub>3</sub>  
 Reference 0.0 ppm  
 Broad.Factor 0.1373 Hz  
 RGain 20  
 Printed 2010/Jul/29 21:03:41  
 Operator

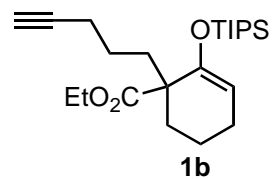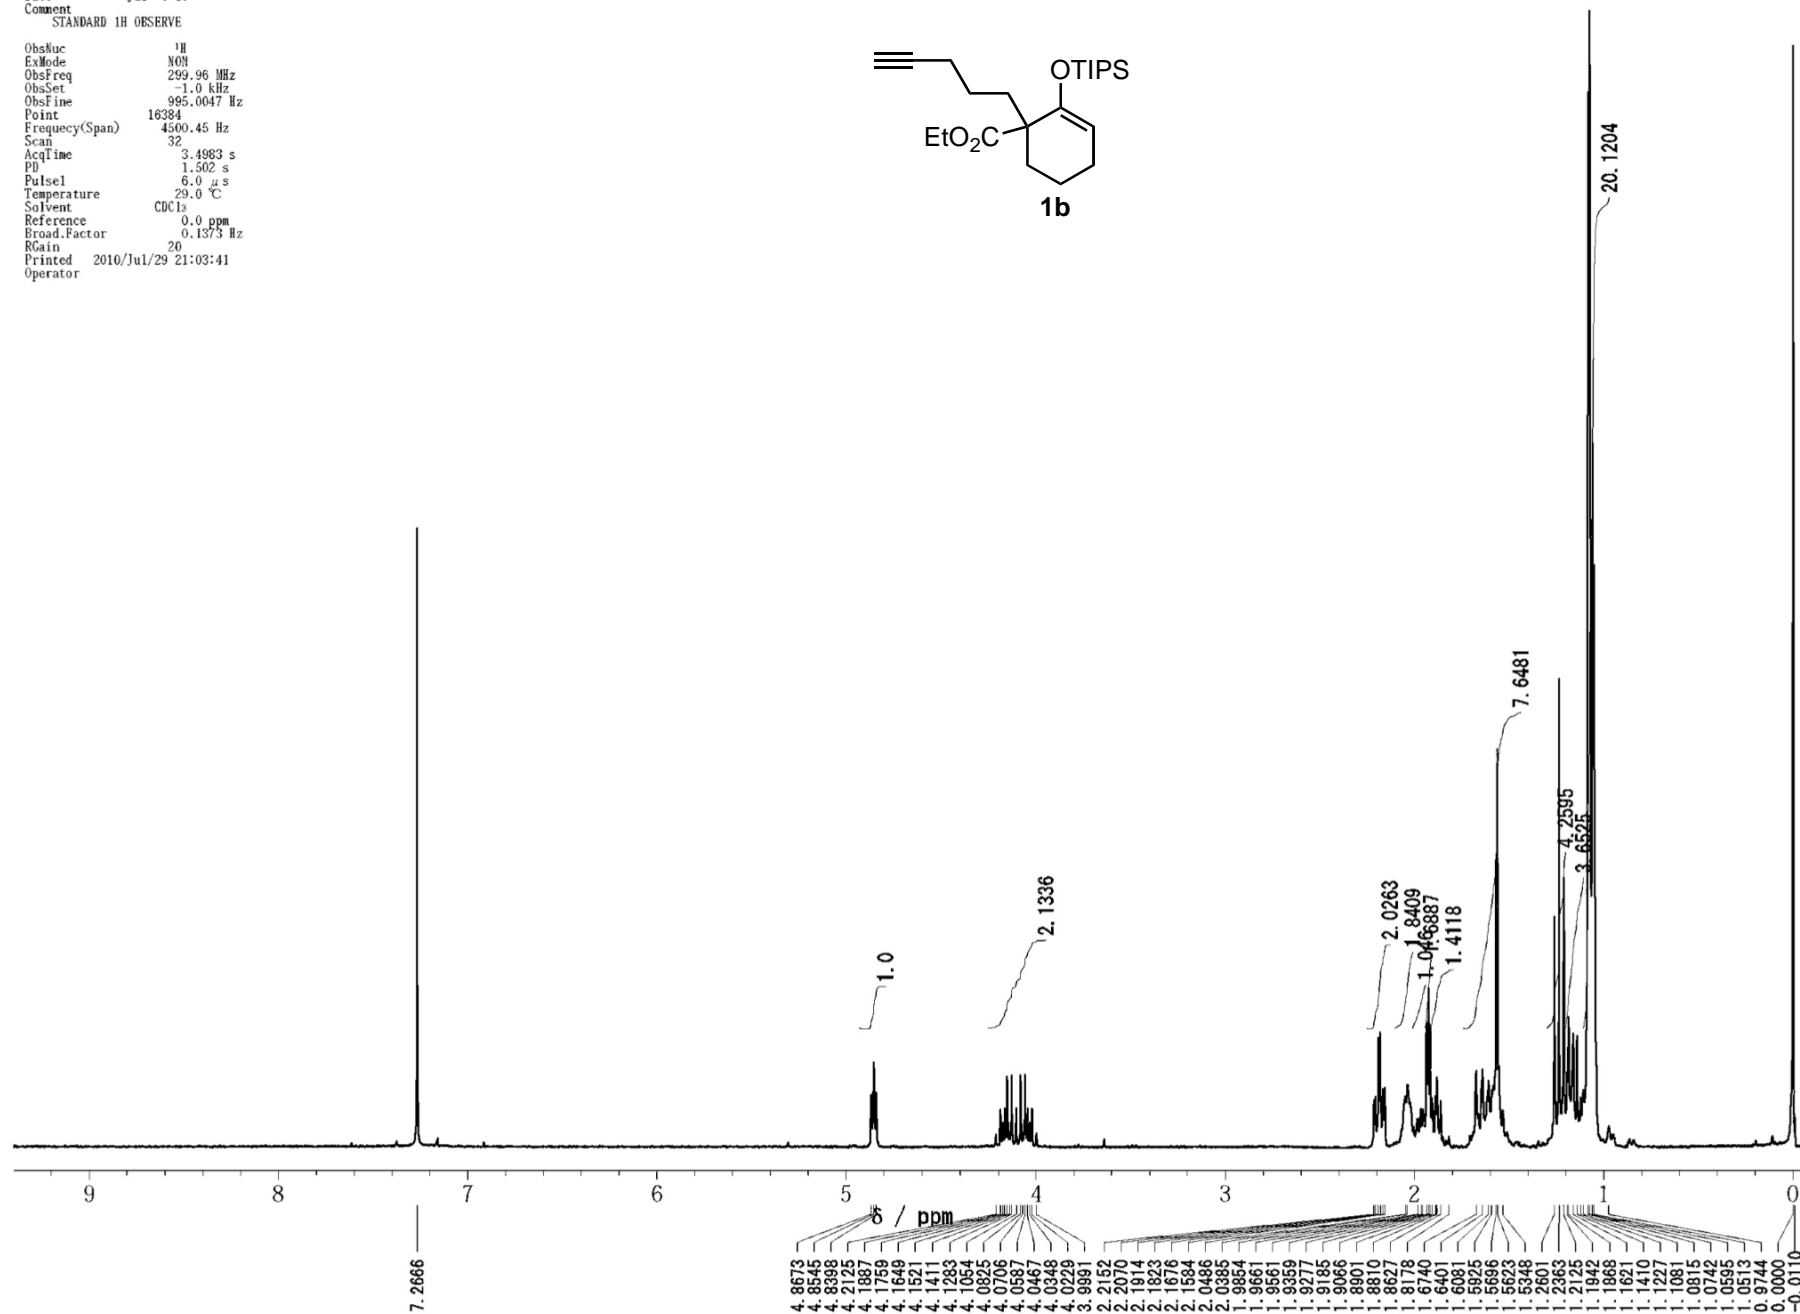



Original File: Jul 6 10  
 Date: Jul 6 10  
 Comment: C13 Standard Observe  
 Stick=none Tune=6.4 Match=0.4

ObsRuc: 13C  
 ExMode: N0H  
 ObsFreq: 75.43 MHz  
 ObsSet: -1.0 kHz  
 ObsFine: 996.3672 Hz  
 Point: 32768  
 Frequency(Span): 18761.73 Hz  
 Scan: 88  
 AcqTime: 1.4992 s  
 PD: 1.501 s  
 Pulse1: 6.0  $\mu$ s  
 Temperature: 29.0  $^{\circ}$ C  
 Solvent: CDCl<sub>3</sub>  
 Reference: 77.0 ppm  
 Broad.Factor: 0.2863 Hz  
 RGain: 30  
 Printed: 2010/Jul/29 21:06:11  
 Operator:

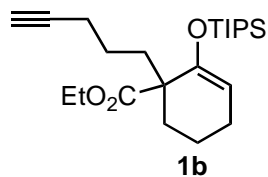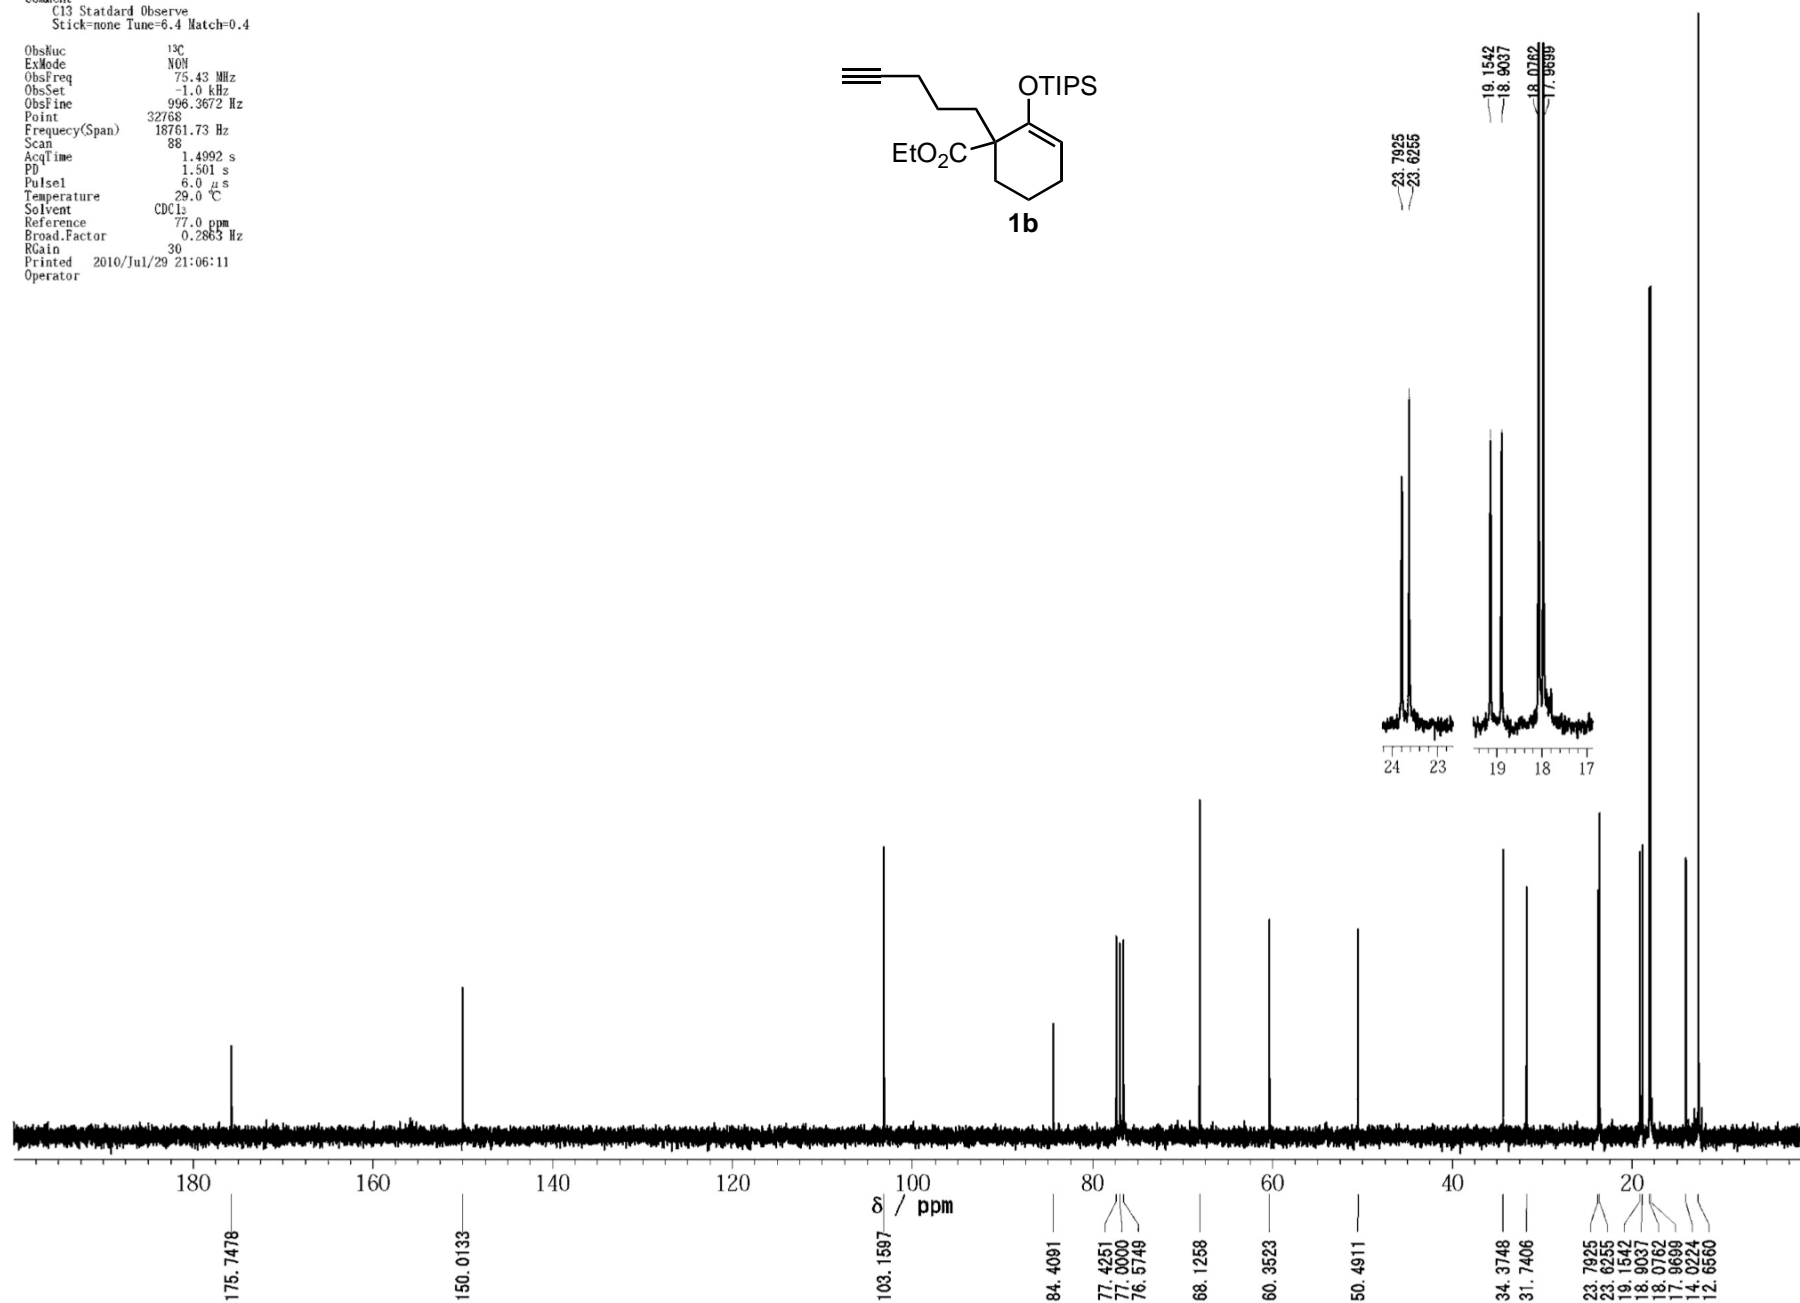

Original File: Jun 18 10  
 Date: Jun 18 10  
 Comment: STANDARD 1H OBSERVE  
 ObsRuoc: 1H  
 ExMode: NMR  
 ObsFreq: 299.96 MHz  
 ObsSet: -1.0 kHz  
 ObsFine: 995.0047 Hz  
 Point: 16384  
 Frequency(Span): 4500.45 Hz  
 Scan: 16  
 AcqTime: 3.4983 s  
 PD: 1.502 s  
 Pulse1: 6.0  $\mu$ s  
 Temperature: 29.0  $^{\circ}$ C  
 Solvent: CDCl<sub>3</sub>  
 Reference: 0.0 ppm  
 Broad.Factor: 0.1373 Hz  
 RGain: 24  
 Printed: 2010/Jul/29 21:15:09  
 Operator:

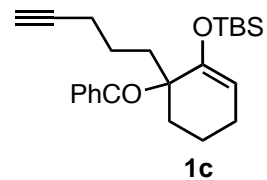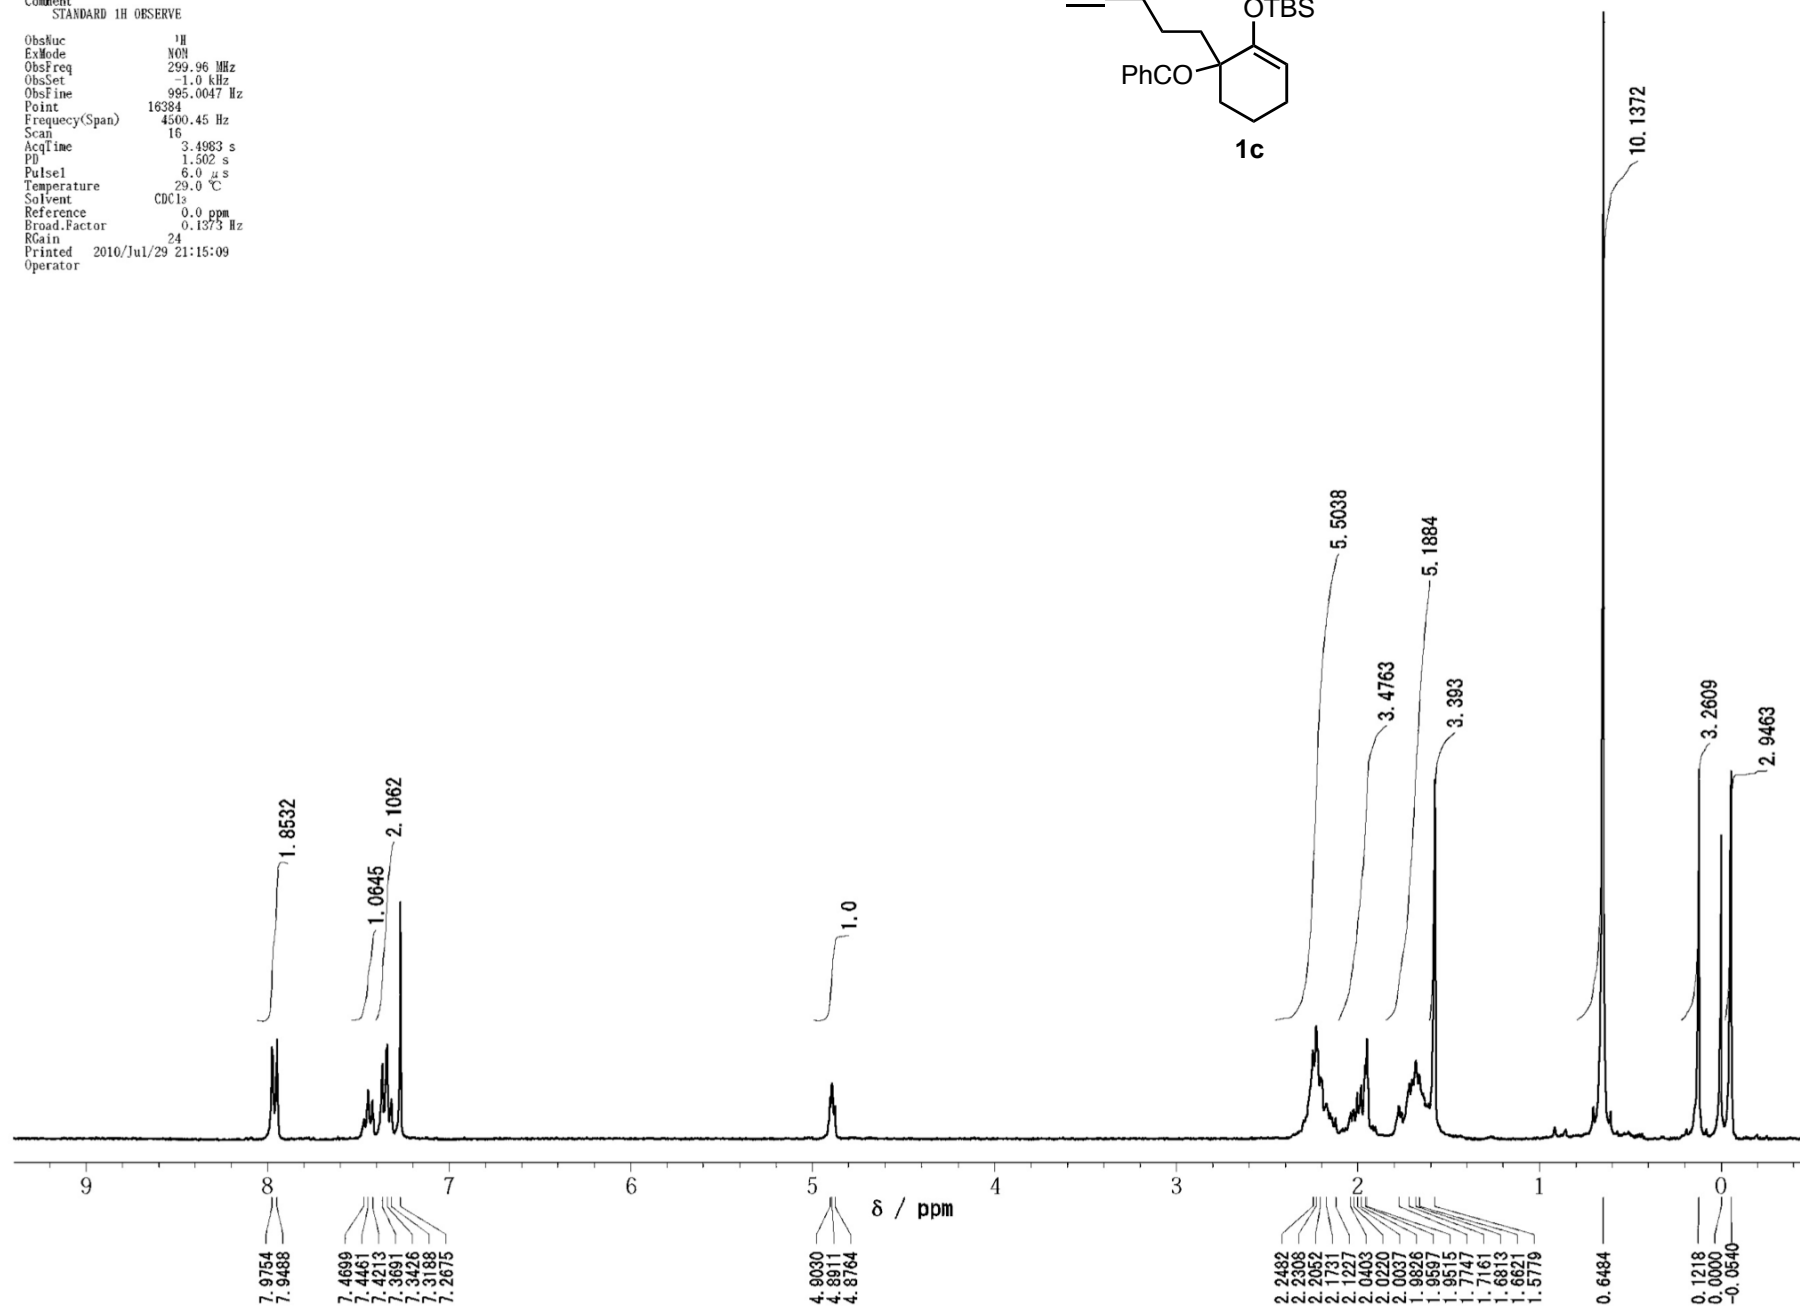

Original File:  
 Date Jun 18 10  
 Comment C13 Standard Observe  
 Stick=none Tune=6.4 Match=0.4

ObsRuc 13C  
 ExMode NOM  
 ObsFreq 75.43 MHz  
 ObsSet -1.0 kHz  
 ObsFine 996.3672 Hz  
 Point 32768  
 Frequency(Span) 18761.73 Hz  
 Scan 128  
 AcqTime 1.4992 s  
 PD 1.501 s  
 Pulse 6.0  $\mu$ s  
 Temperature 29.0  $^{\circ}$ C  
 Solvent CDCl<sub>3</sub>  
 Reference 77.0 ppm  
 Broad.Factor 0.2863 Hz  
 RGain 30  
 Printed 2010/Jul/29 21:17:05  
 Operator

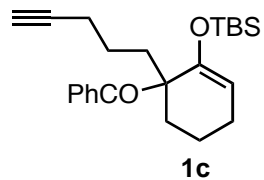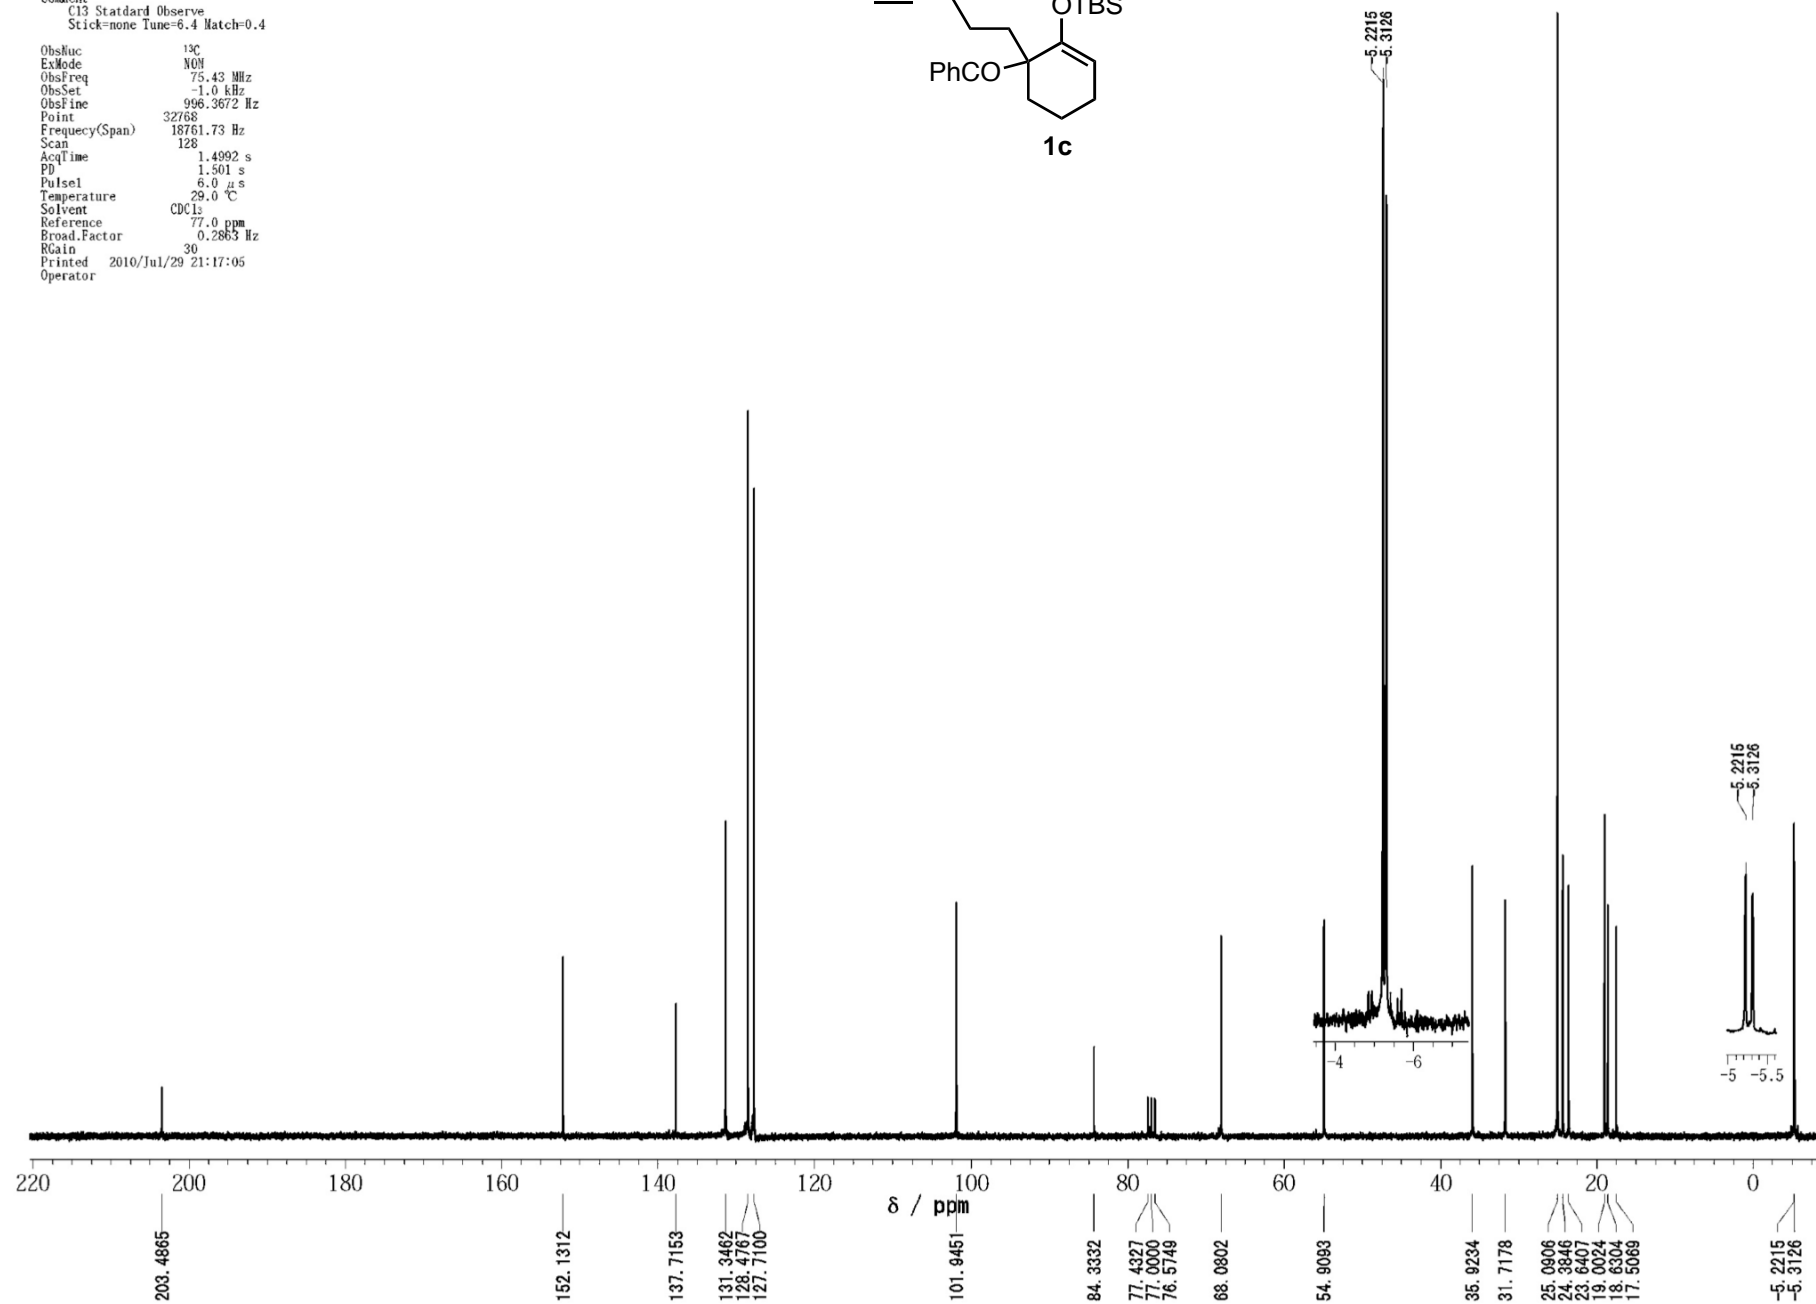

Original File: Oct 7 09  
 Date  
 Comment  
 STANDARD 1H OBSERVE  
 ObsRuoc 1H  
 ExMode NMR  
 ObsFreq 299.96 MHz  
 ObsSet -1.0 kHz  
 ObsFine 995.0047 Hz  
 Point 16384  
 Frequency(Span) 4500.45 Hz  
 Scan 16  
 AcqTime 3.4983 s  
 PD 1.502 s  
 Pulse1 6.0  $\mu$ s  
 Temperature 29.0  $^{\circ}$ C  
 Solvent CDCl<sub>3</sub>  
 Reference 0.0 ppm  
 Broad.Factor 0.1373 Hz  
 RGain 24  
 Printed 2010/Jul/29 21:22:06  
 Operator

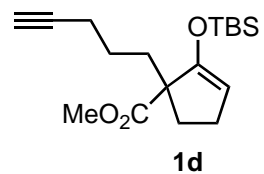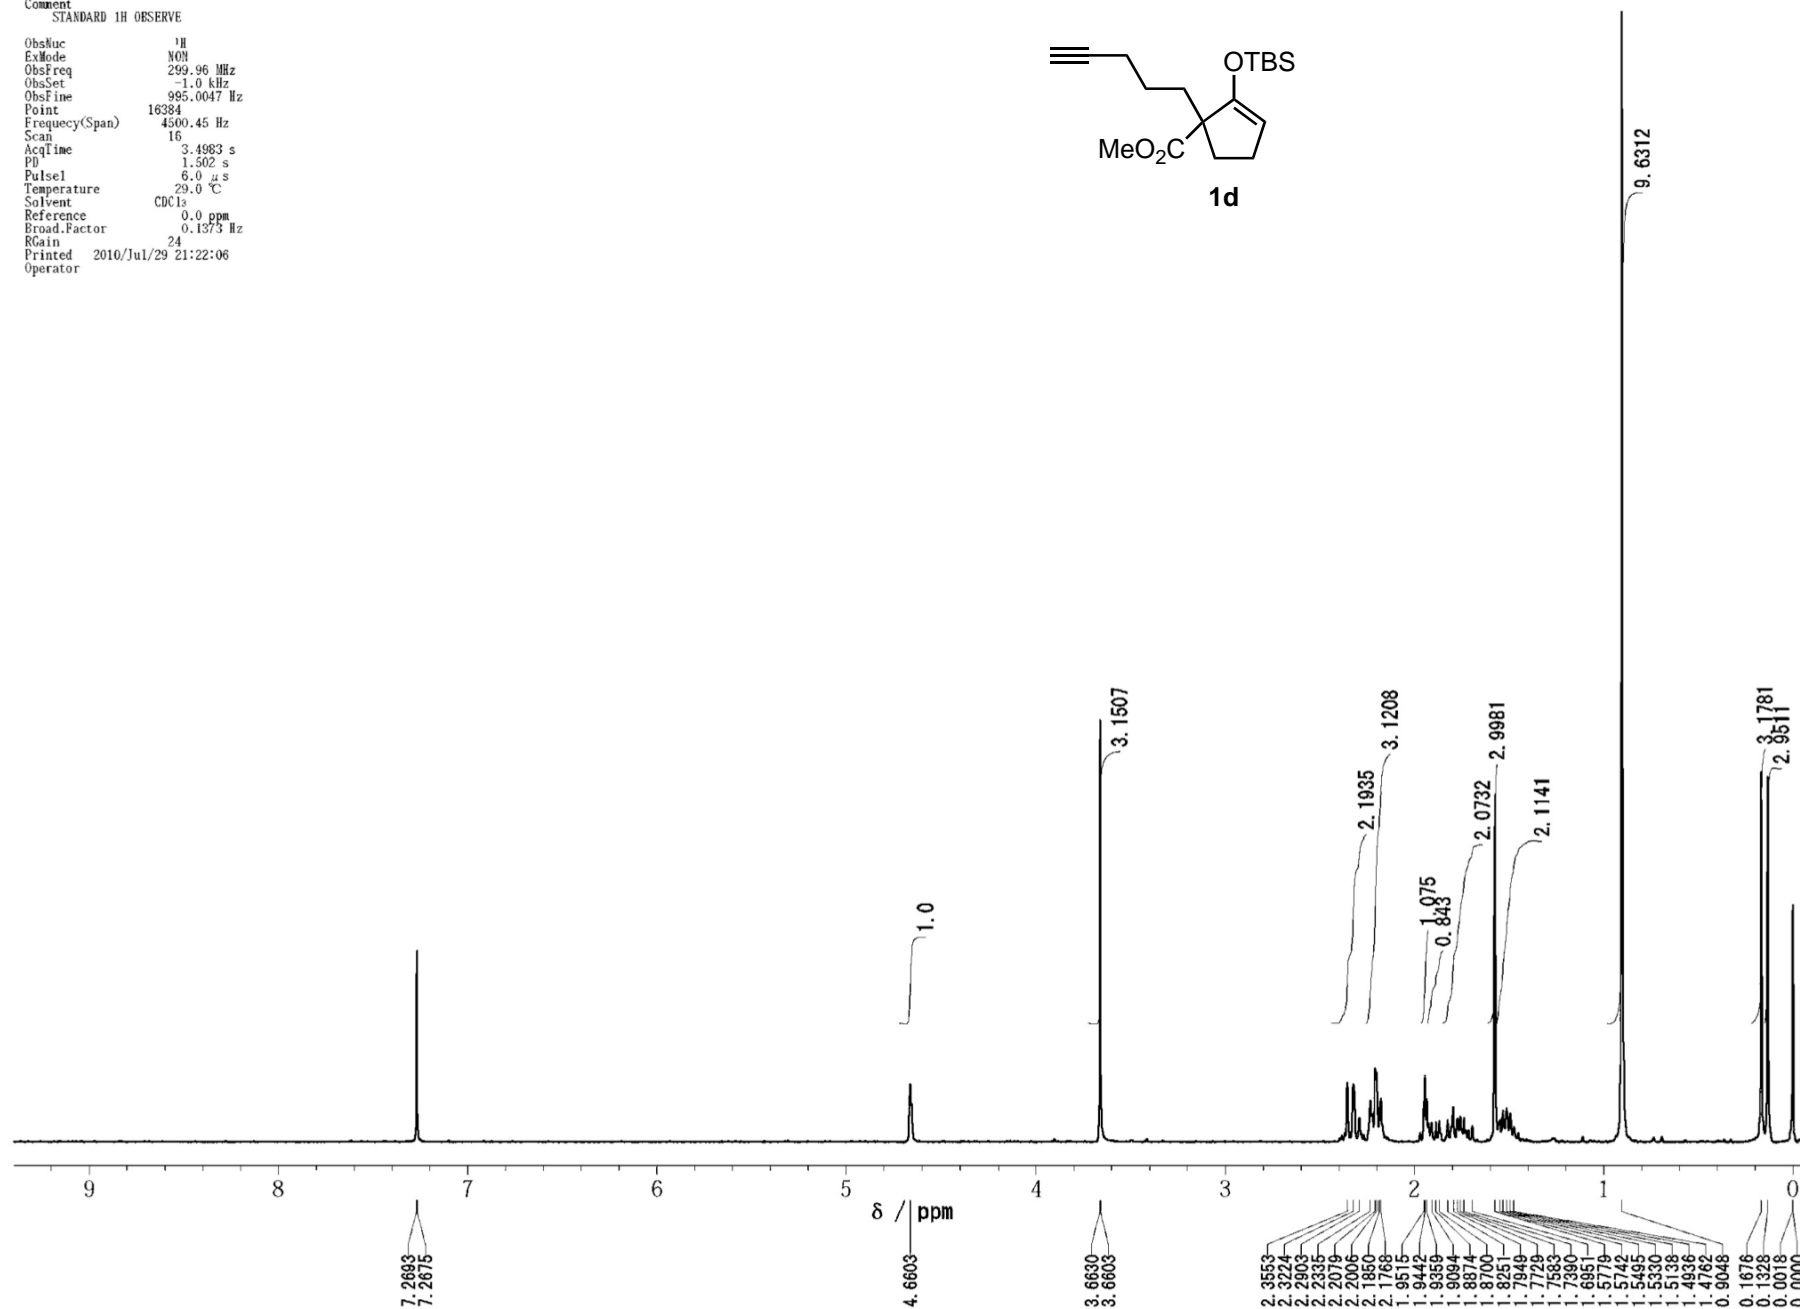

Original File: Jun 28 10  
 Date  
 Comment C13 Standard Observe  
 Stick=none Tune=6.4 Match=0.4

ObsRoc 13C  
 ExMode NOM  
 ObsFreq 75.43 MHz  
 ObsSet -1.0 kHz  
 ObsFine 996.3672 Hz  
 Point 32768  
 Frequency(Span) 18761.73 Hz  
 Scan 88  
 AcqTime 1.4992 s  
 PD 1.501 s  
 Pulse 6.0  $\mu$ s  
 Temperature 29.0  $^{\circ}$ C  
 Solvent CDCl<sub>3</sub>  
 Reference 77.0 ppm  
 Broad.Factor 0.2863 Hz  
 RGain 30  
 Printed 2010/Jul/29 21:29:16  
 Operator

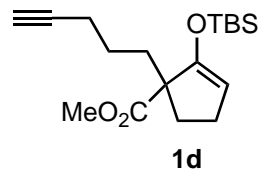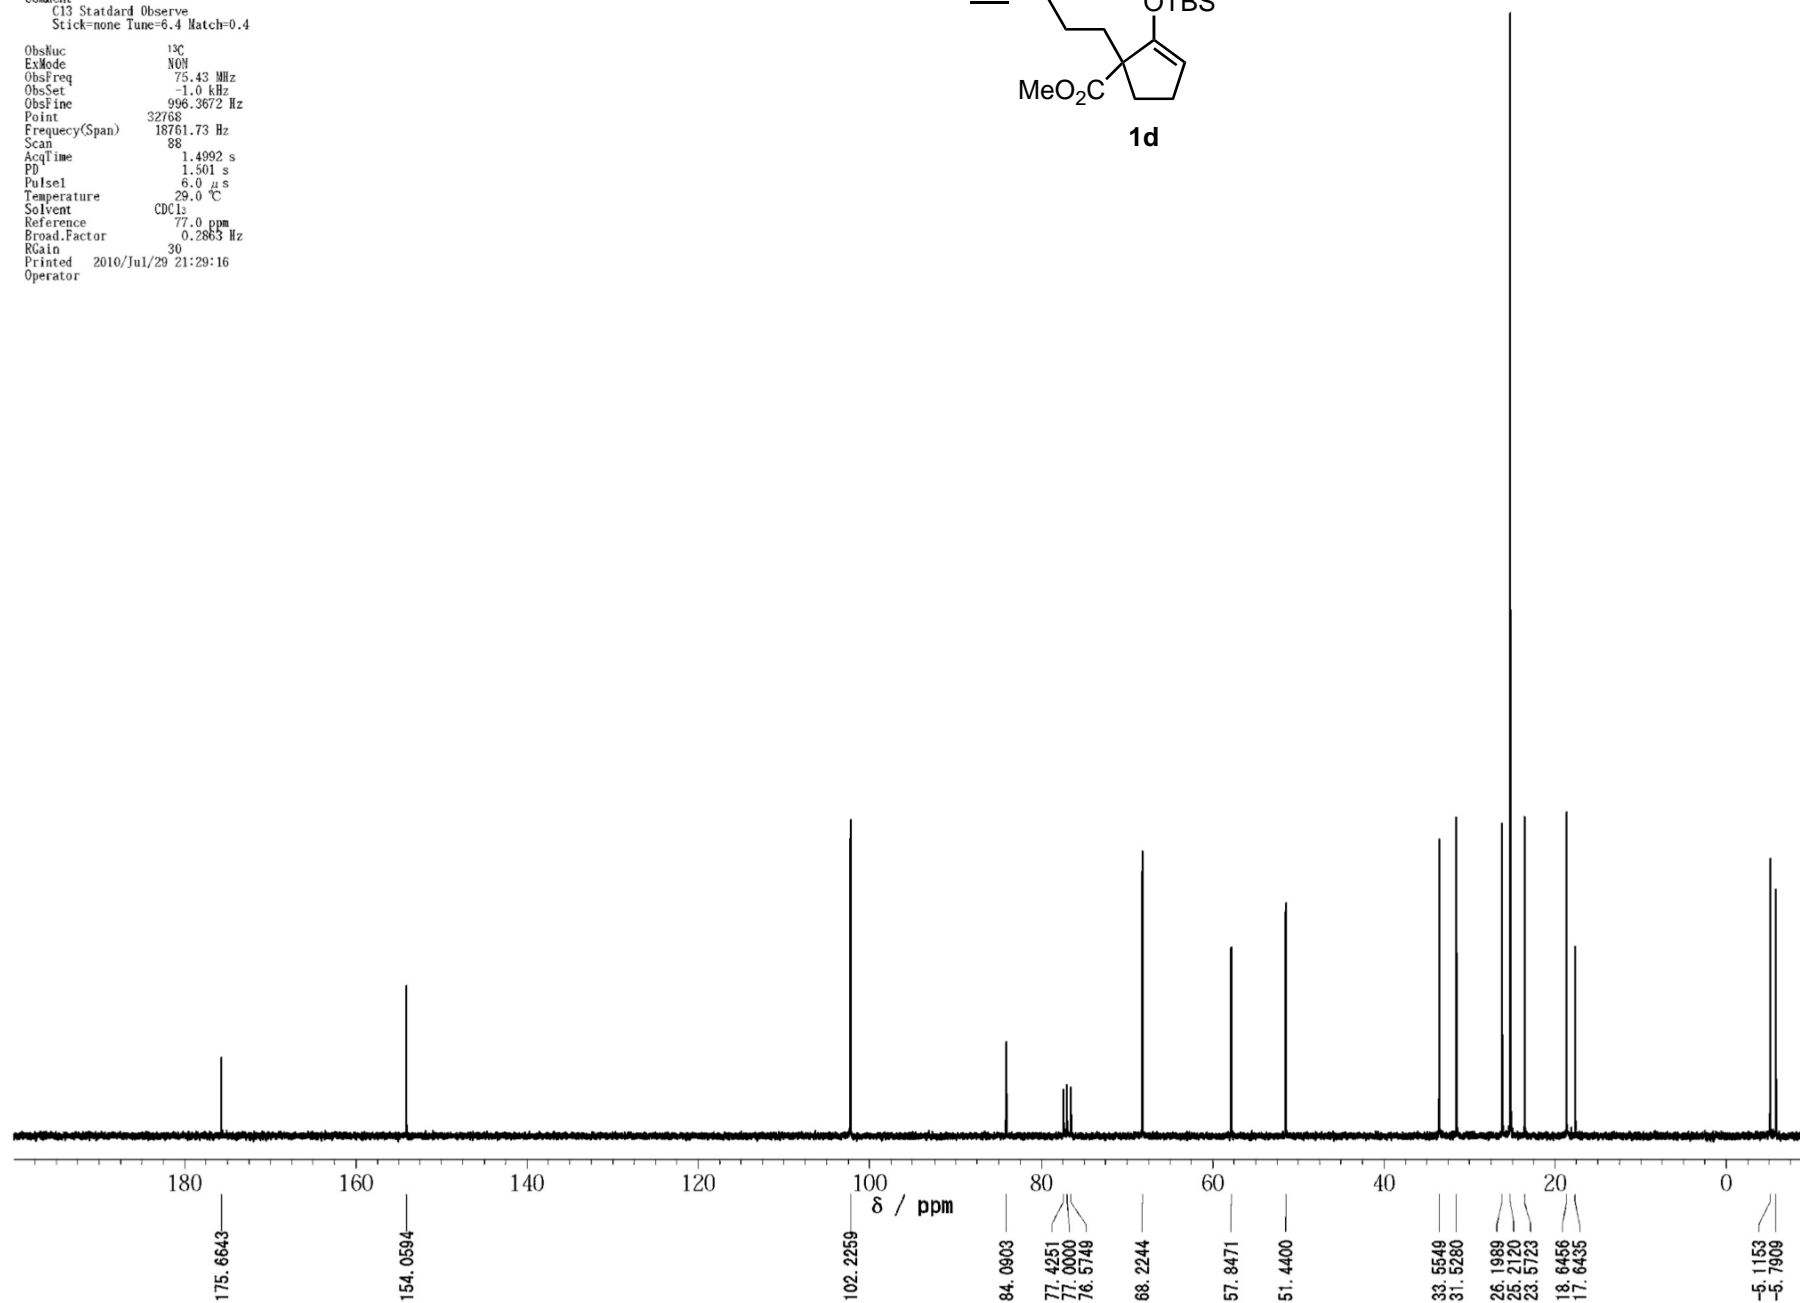

Original File:  
Date Jun 28 10  
Comment  
STANDARD 1H OBSERVE

|                 |                      |                |
|-----------------|----------------------|----------------|
| Obsluc          |                      | <sup>1</sup> H |
| ExMod           |                      | NH             |
| ObsFreq         | 299.96               | MHz            |
| ObsSet          | -1.0                 | kHz            |
| ObsFreq         | 995.0047             | Mz             |
| Frequency(Span) | 16384                |                |
| Scan            | 4500.45              | Hz             |
| AcqTime         | 16                   |                |
| PD              | 3.4983               | s              |
| Pulse           | 1.502                | s              |
| Temperature     | 6.0                  | μs             |
| Solvent         | 29.0                 | °C             |
| Reference       | CDCl <sub>3</sub>    |                |
| Broad.Factor    | 0.0                  | ppm            |
| RGain           | 0.1373               | Hz             |
| Printed         | 18                   |                |
| Operator        | 2010/Jul/29 21:37:48 |                |

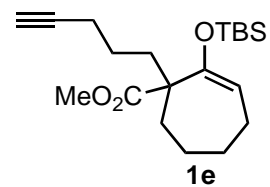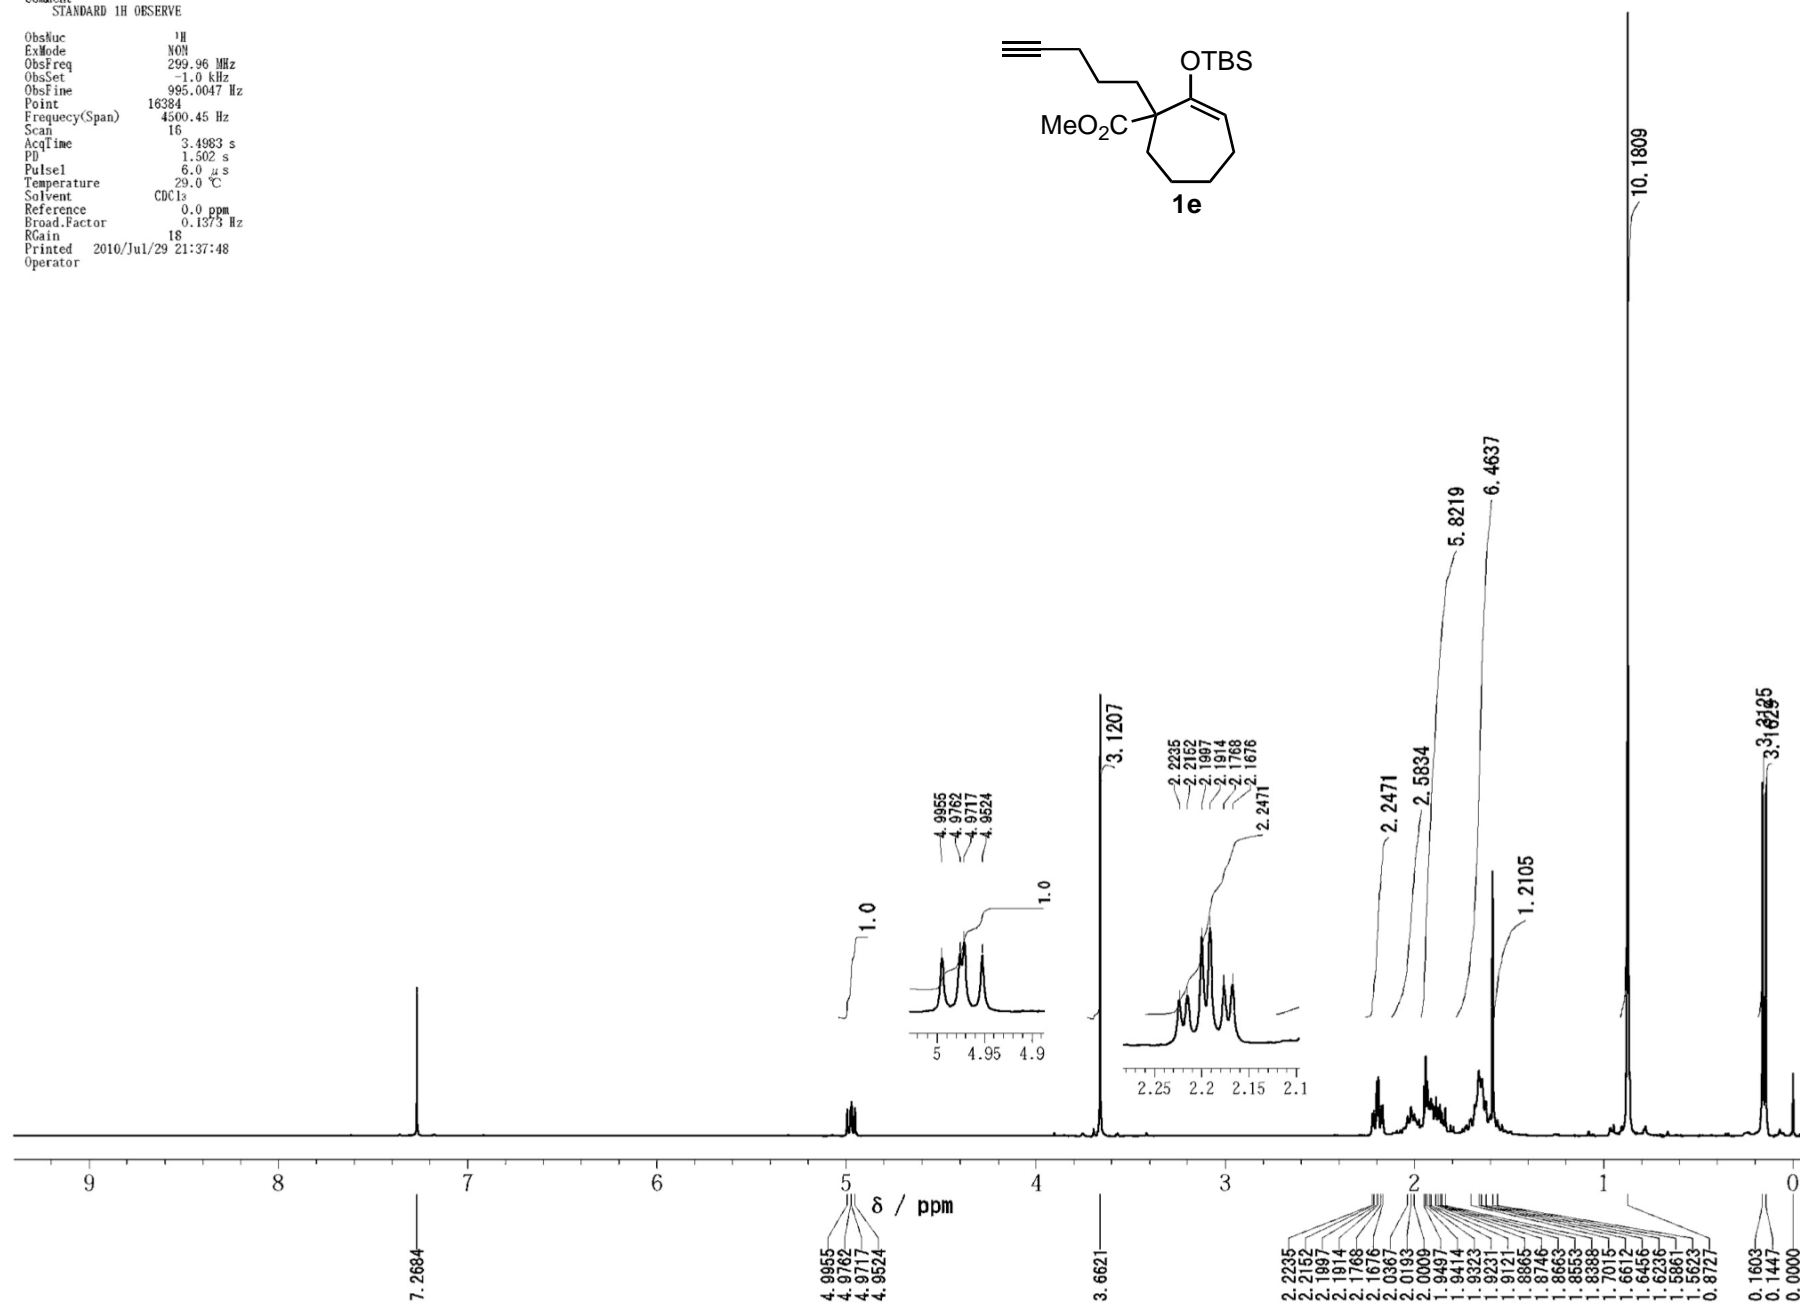



Original File:  
 Date Jun 28 10  
 Comment C13 Standard Observe  
 Stick=none Tune=6.4 Match=0.4

ObsRoc 13C  
 ExMode NOM  
 ObsFreq 75.43 MHz  
 ObsSet -1.0 kHz  
 ObsFine 996.3672 Hz  
 Point 32768  
 Frequency(Span) 18761.73 Hz  
 Scan 80  
 AcqTime 1.4992 s  
 PD 1.501 s  
 Pulse 6.0  $\mu$ s  
 Temperature 29.0  $^{\circ}$ C  
 Solvent CDCl<sub>3</sub>  
 Reference 77.0 ppm  
 Broad.Factor 0.2863 Hz  
 RGain 30  
 Printed 2010/Jul/29 21:39:29  
 Operator

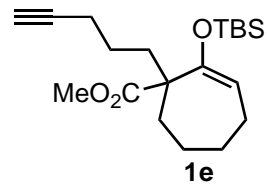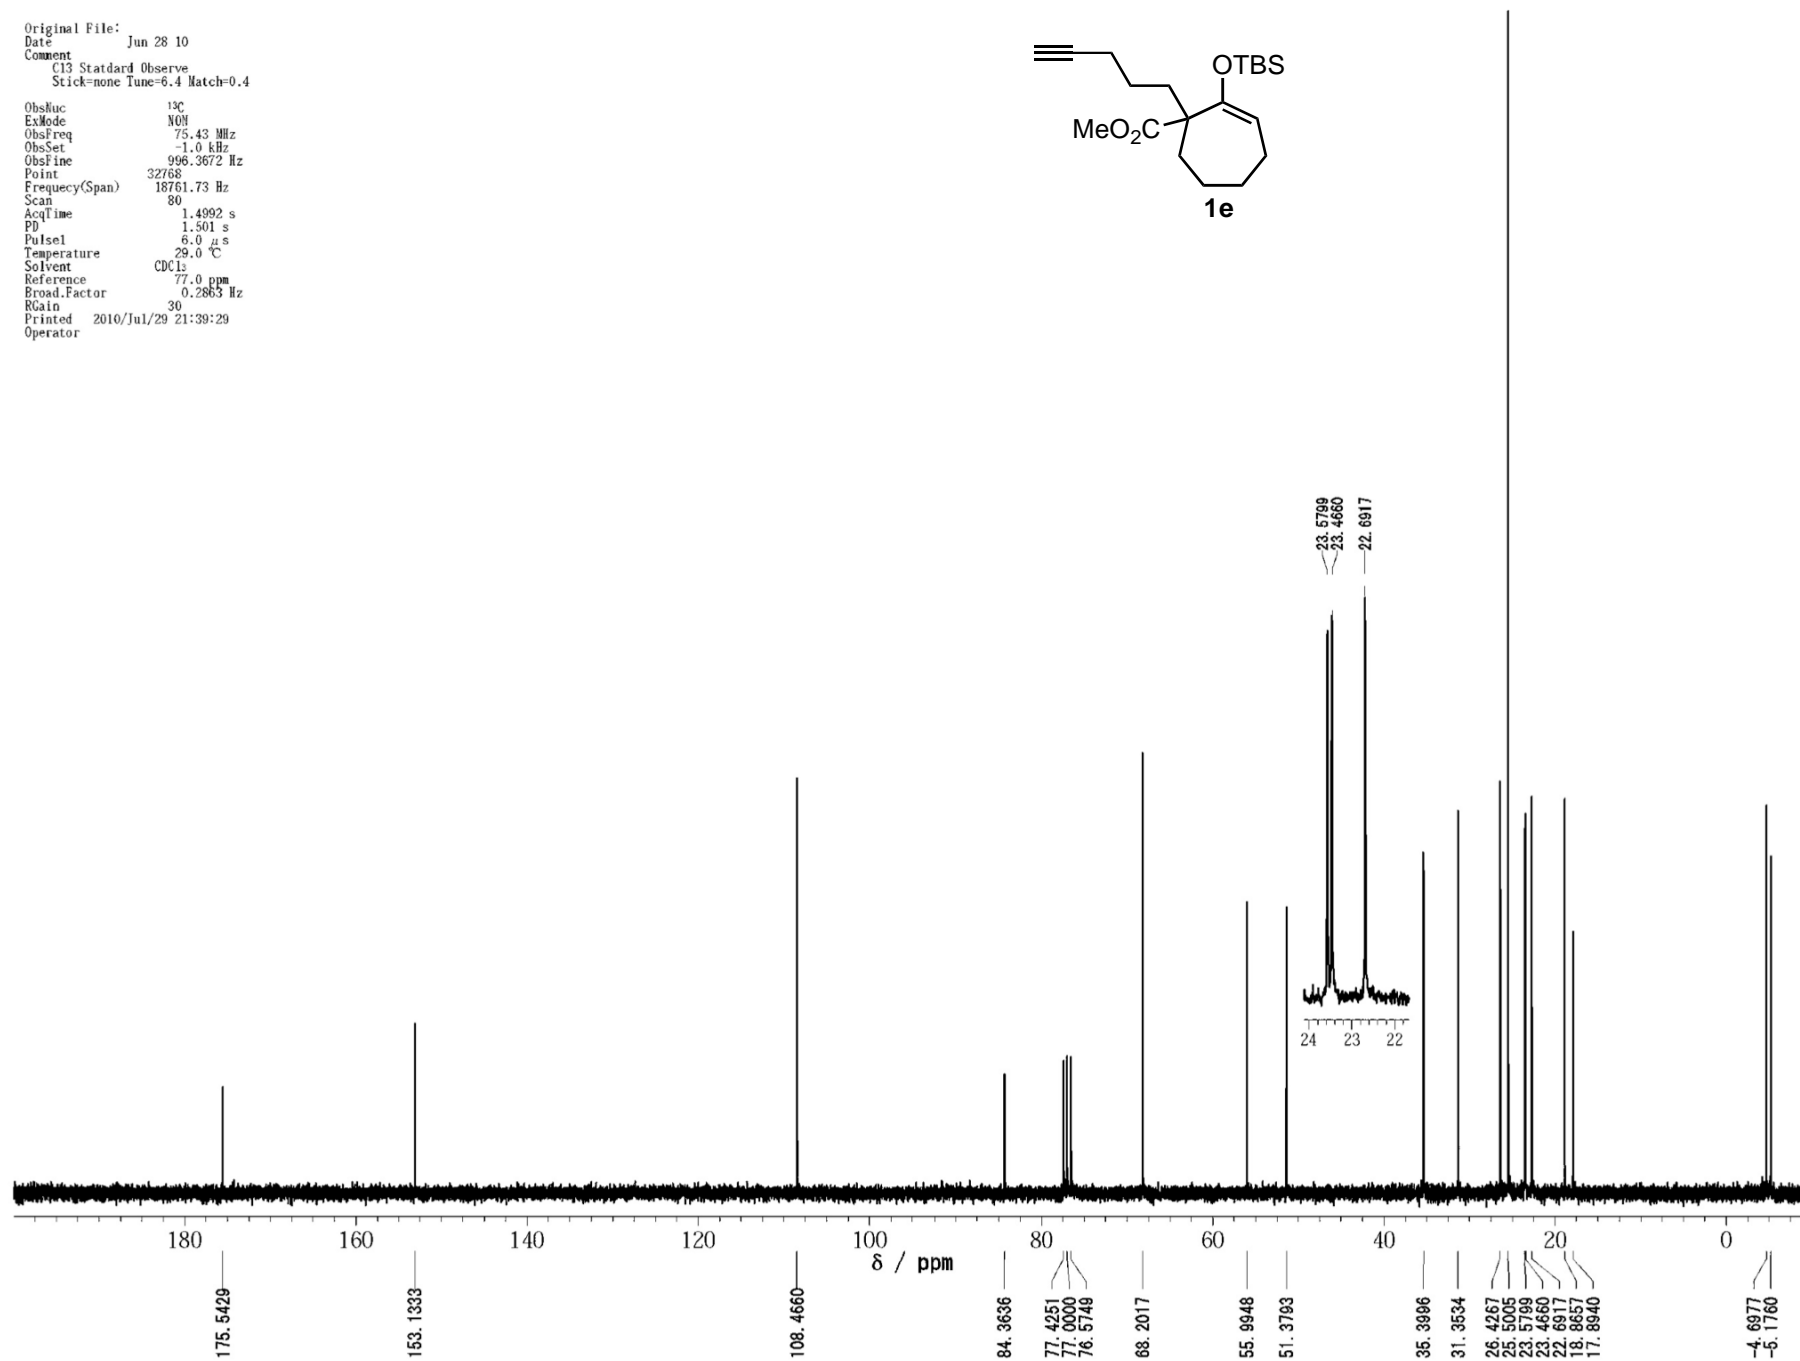

Original File:   
 Date Jun 28 10   
 Comment   
 STANDARD 1H OBSERVE   
 ObsRuoc <sup>1</sup>H   
 ExMode NMR   
 ObsFreq 299.96 MHz   
 ObsSet -1.0 kHz   
 ObsFine 995.0047 Hz   
 Point 16384   
 Frequency(Span) 4500.45 Hz   
 Scan 16   
 AcqTime 3.4983 s   
 PD 1.502 s   
 Pulse1 6.0  $\mu$ s   
 Temperature 29.0  $^{\circ}$ C   
 Solvent CDCl<sub>3</sub>   
 Reference 0.0 ppm   
 Broad.Factor 0.1373 Hz   
 RGain 14   
 Printed 2010/Jul/29 21:46:40   
 Operator

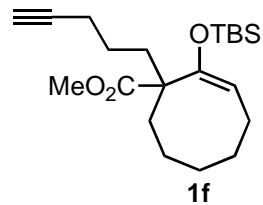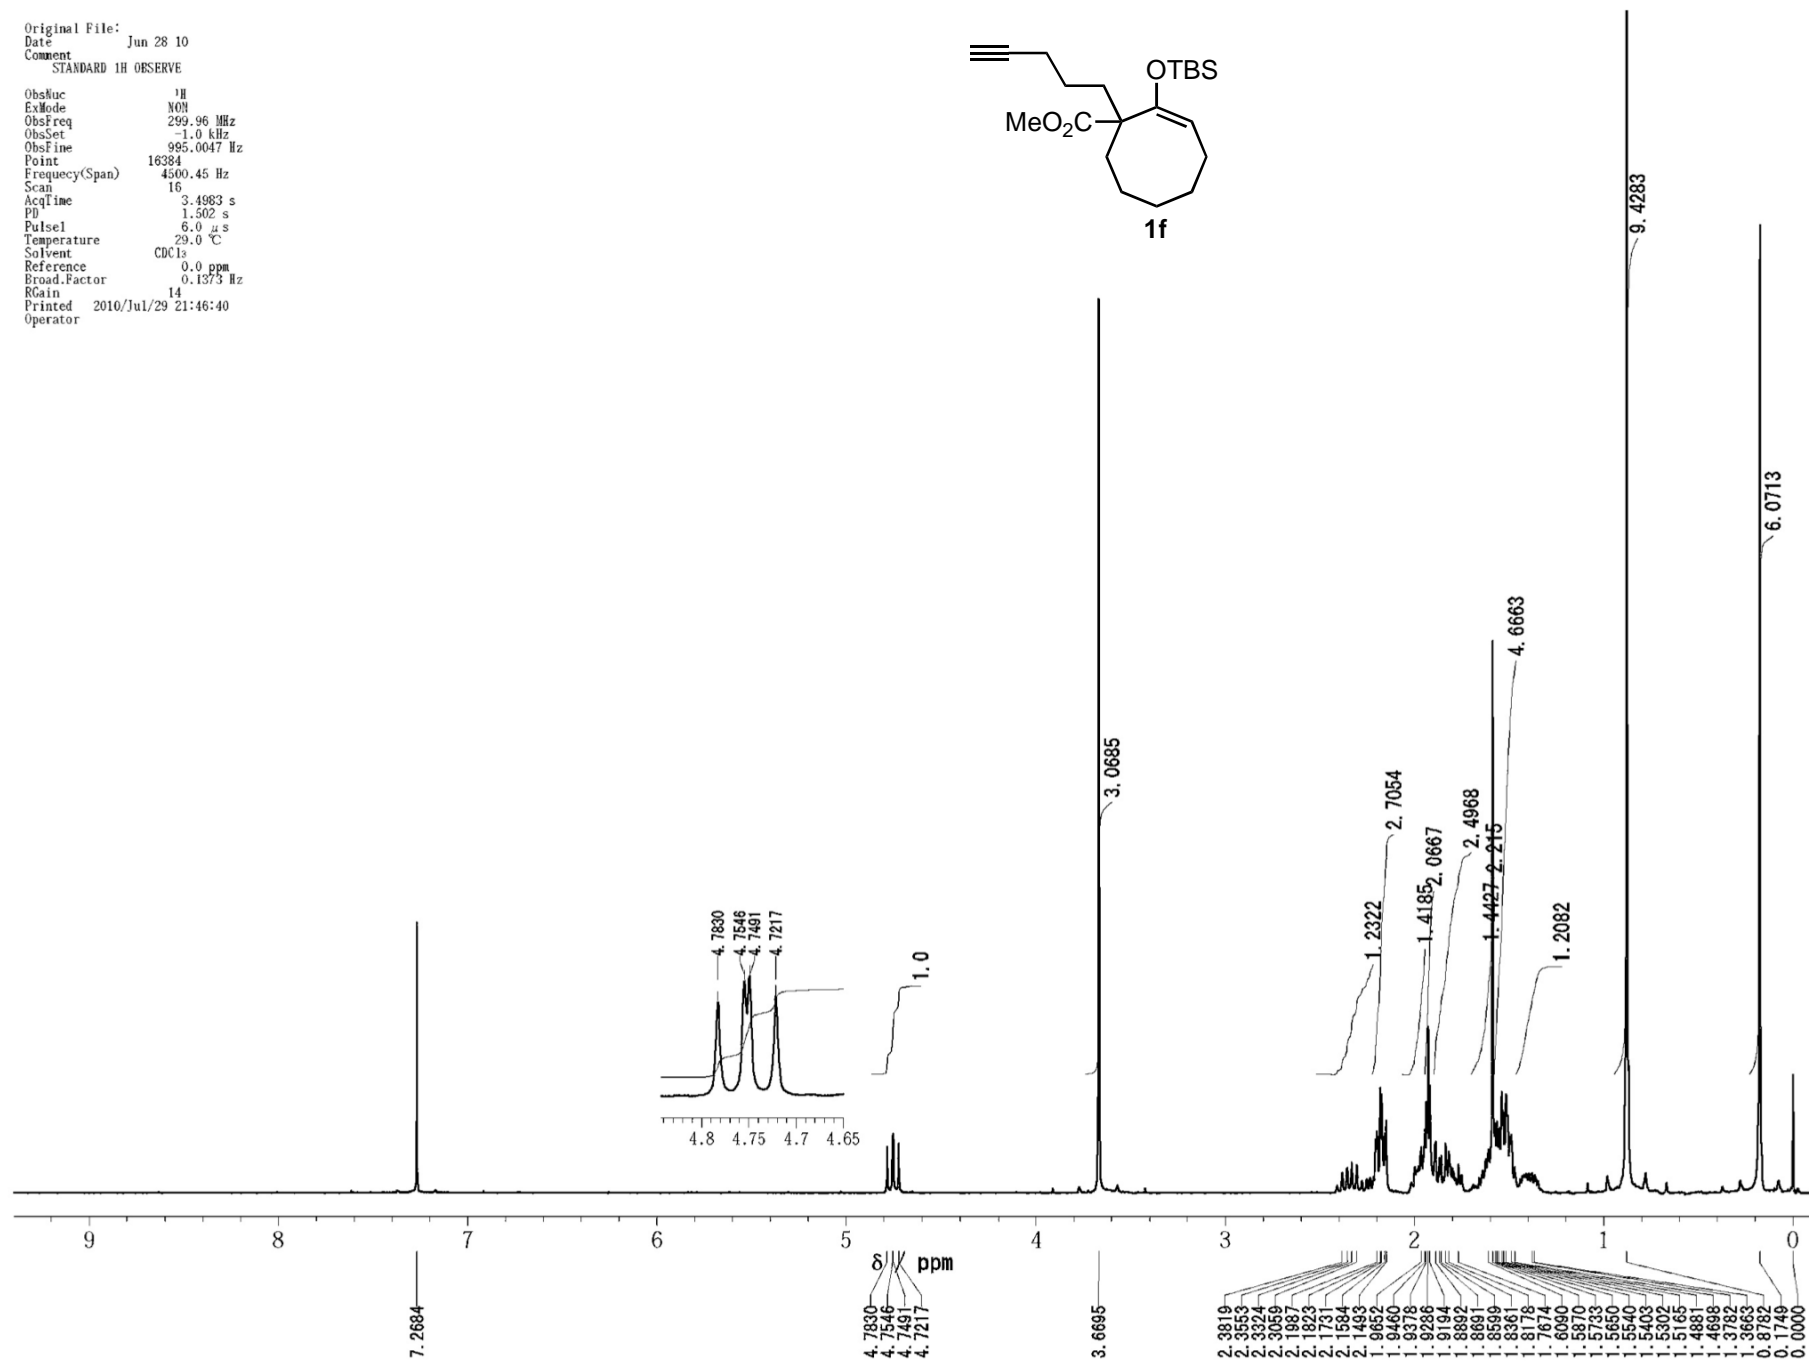

Original File:  
 Date Jun 28 10  
 Comment  
 C13 Standard Observe  
 Stick=none Tune=6.4 Match=0.4

ObsRoc 13C  
 ExMode NOM  
 ObsFreq 75.43 MHz  
 ObsSet -1.0 kHz  
 ObsFine 996.3672 Hz  
 Point 32768  
 Frequency(Span) 18761.73 Hz  
 Scan 80  
 AcqTime 1.4992 s  
 PD 1.501 s  
 Pulse 6.0  $\mu$ s  
 Temperature 29.0  $^{\circ}$ C  
 Solvent CDCl<sub>3</sub>  
 Reference 77.0 ppm  
 Broad.Factor 0.2863 Hz  
 RGain 30  
 Printed 2010/Jul/29 21:48:10  
 Operator

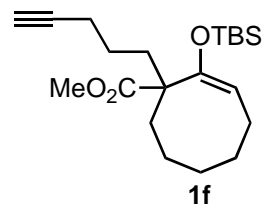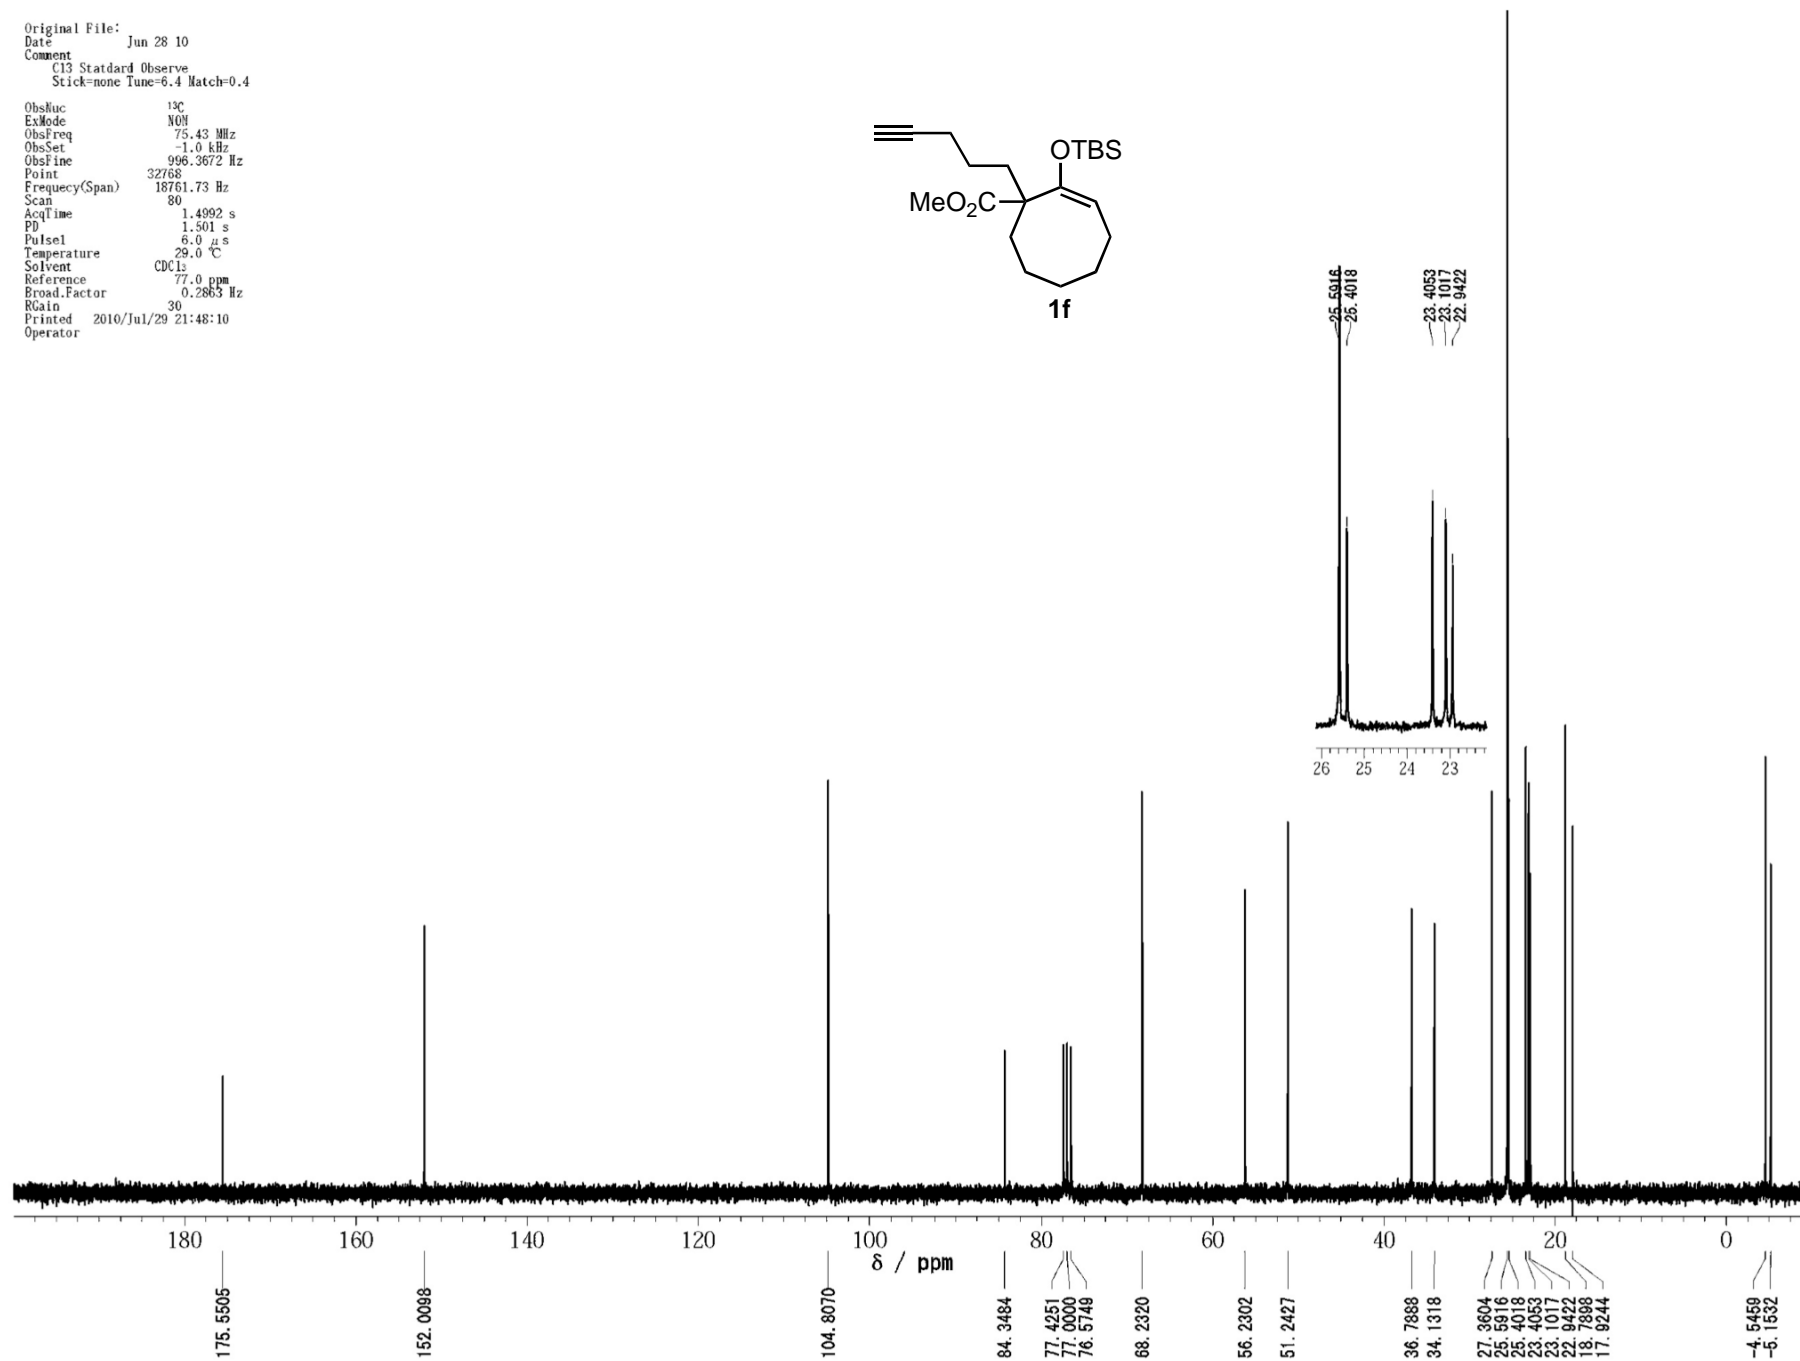

Original File:  
 Date Jun 22 10  
 Comment  
 STANDARD 1H OBSERVE  
 ObsMod 1H  
 ExMode NMR  
 ObsFreq 299.96 MHz  
 ObsSet -1.0 kHz  
 ObsFine 995.0047 Hz  
 Point 16384  
 Frequency(Span) 4500.45 Hz  
 Scan 32  
 AcqTime 3.4983 s  
 PD 1.502 s  
 Pulse1 6.0  $\mu$ s  
 Temperature 29.0  $^{\circ}$ C  
 Solvent CDCl<sub>3</sub>  
 Reference 0.0 ppm  
 Broad.Factor 0.1373 Hz  
 RGain 24  
 Printed 2010/Jul/29 22:05:19  
 Operator

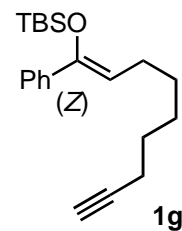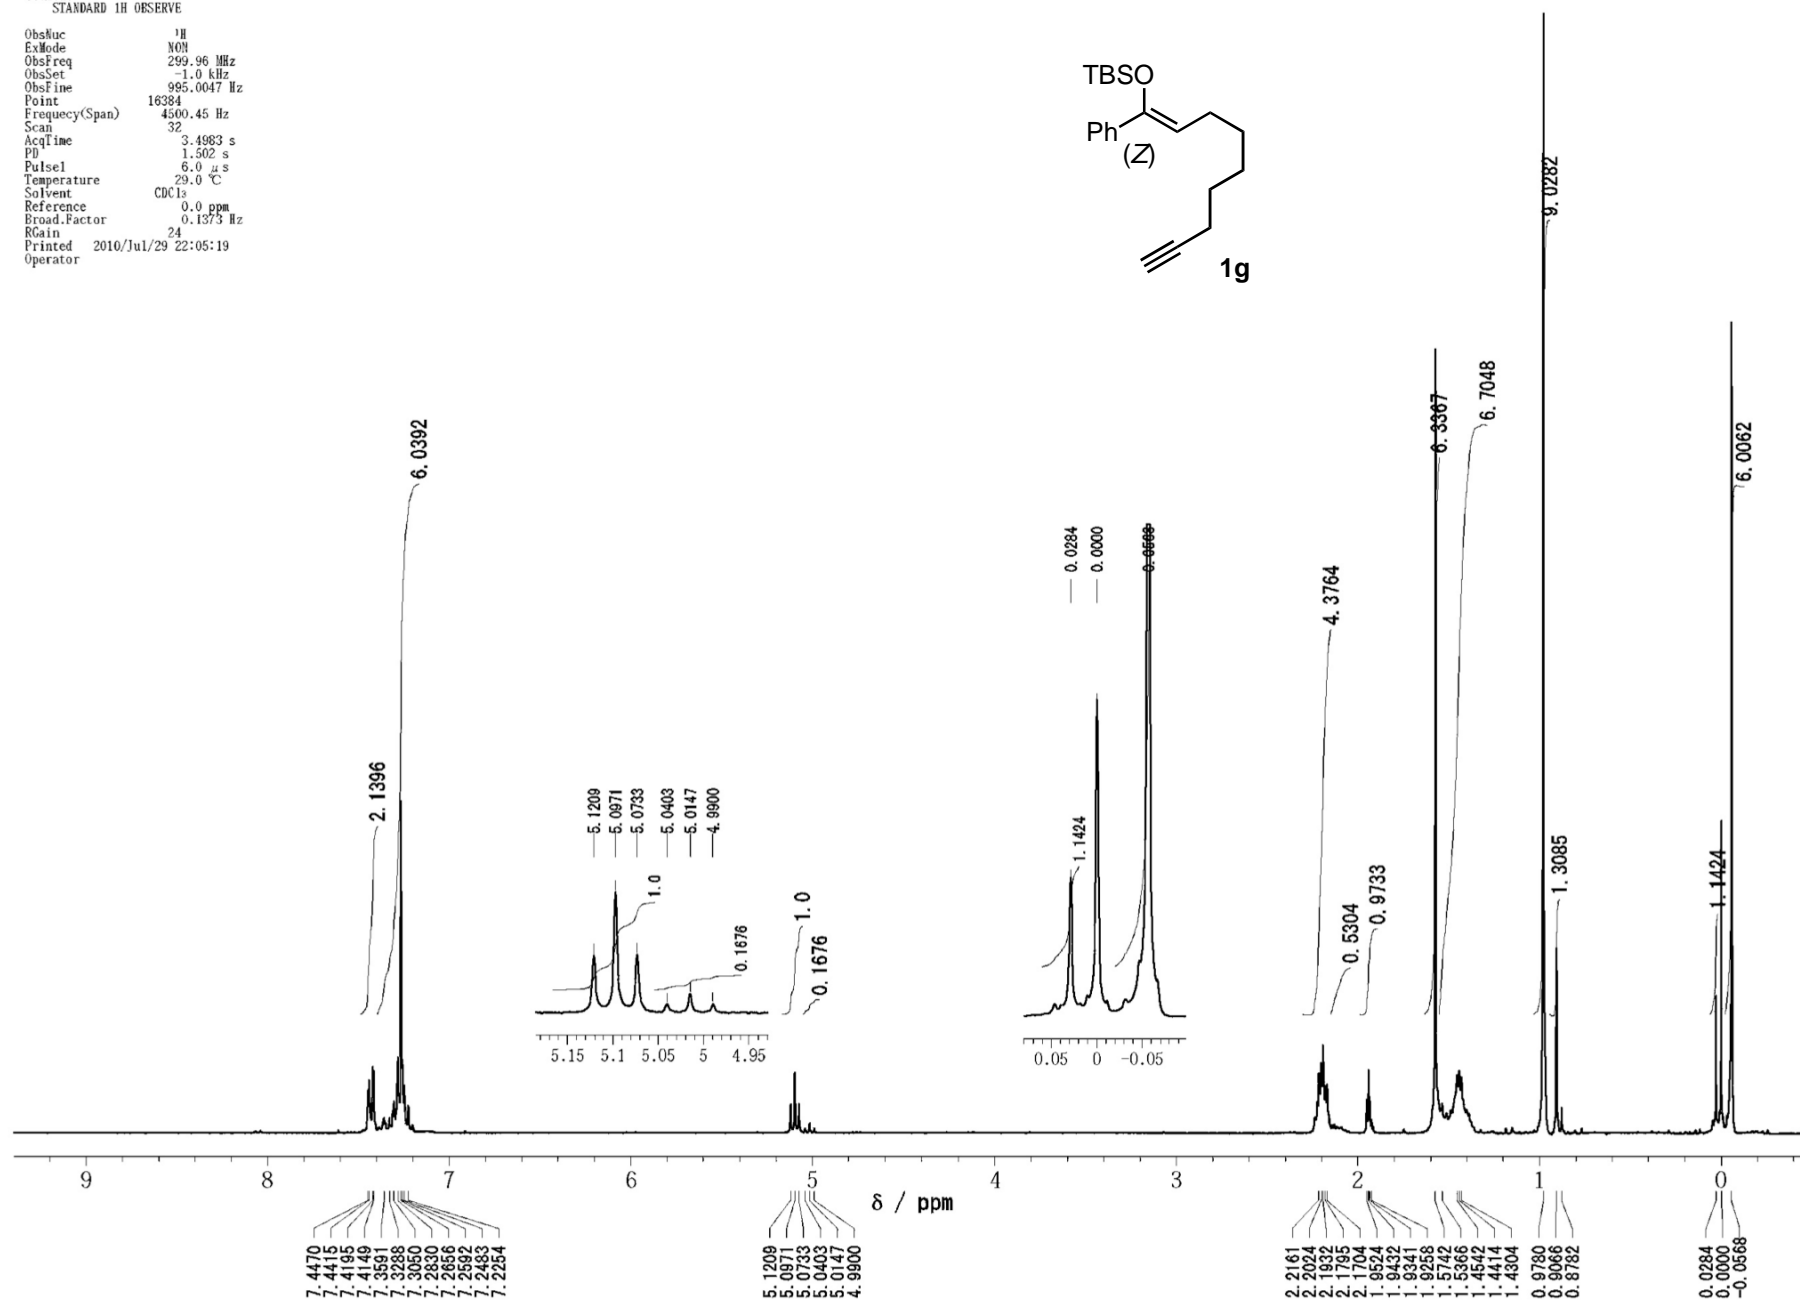

Original File:  
 Date Jun 22 10  
 Comment C13 Standard Observe  
 Stick=none Tune=6.4 Match=0.4

ObsRuc 13C  
 ExMode N0H  
 ObsFreq 75.43 MHz  
 ObsSet -1.0 kHz  
 ObsFine 996.3672 Hz  
 Point 32768  
 Frequency(Span) 18761.73 Hz  
 Scan 120  
 AcqTime 1.4992 s  
 PD 1.501 s  
 Pulse 6.0  $\mu$ s  
 Temperature 29.0  $^{\circ}$ C  
 Solvent CDCl<sub>3</sub>  
 Reference 77.0 ppm  
 Broad.Factor 0.2863 Hz  
 RGain 30  
 Printed 2010/Jul/29 22:09:11  
 Operator

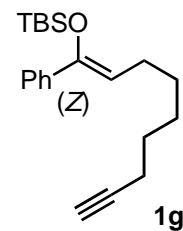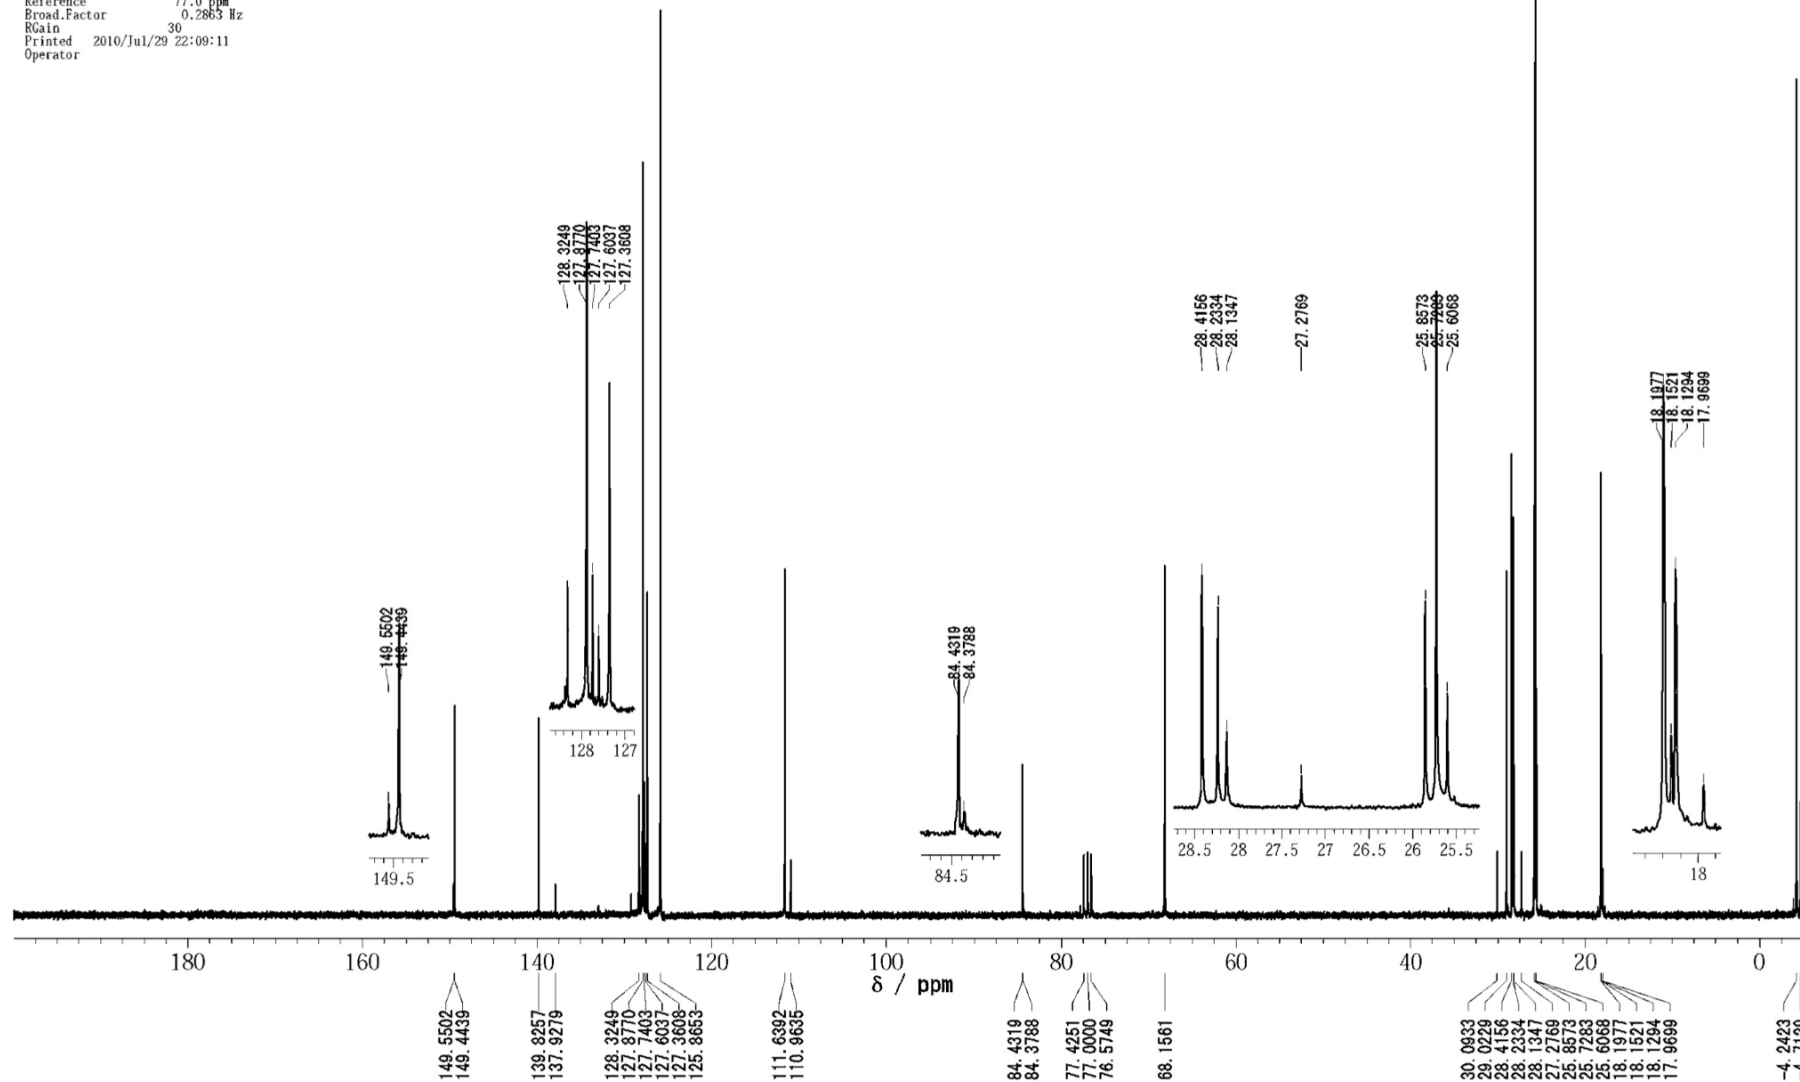

Original File:   
 Date Jun 12 10   
 Comment   
 STANDARD 1H OBSERVE   
 ObsMod 1H   
 ExMode NMR   
 ObsFreq 299.96 MHz   
 ObsSet -1.0 kHz   
 ObsFine 995.0047 Hz   
 Point 16384   
 Frequency(Span) 4500.45 Hz   
 Scan 16   
 AcqTime 3.4983 s   
 PD 1.502 s   
 Pulse1 6.0  $\mu$ s   
 Temperature 29.0  $^{\circ}$ C   
 Solvent CDCl<sub>3</sub>   
 Reference 0.0 ppm   
 Broad.Factor 0.1373 Hz   
 RGain 24   
 Printed 2010/Jul/29 22:30:45   
 Operator

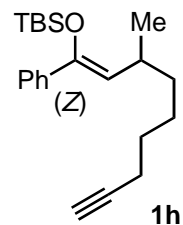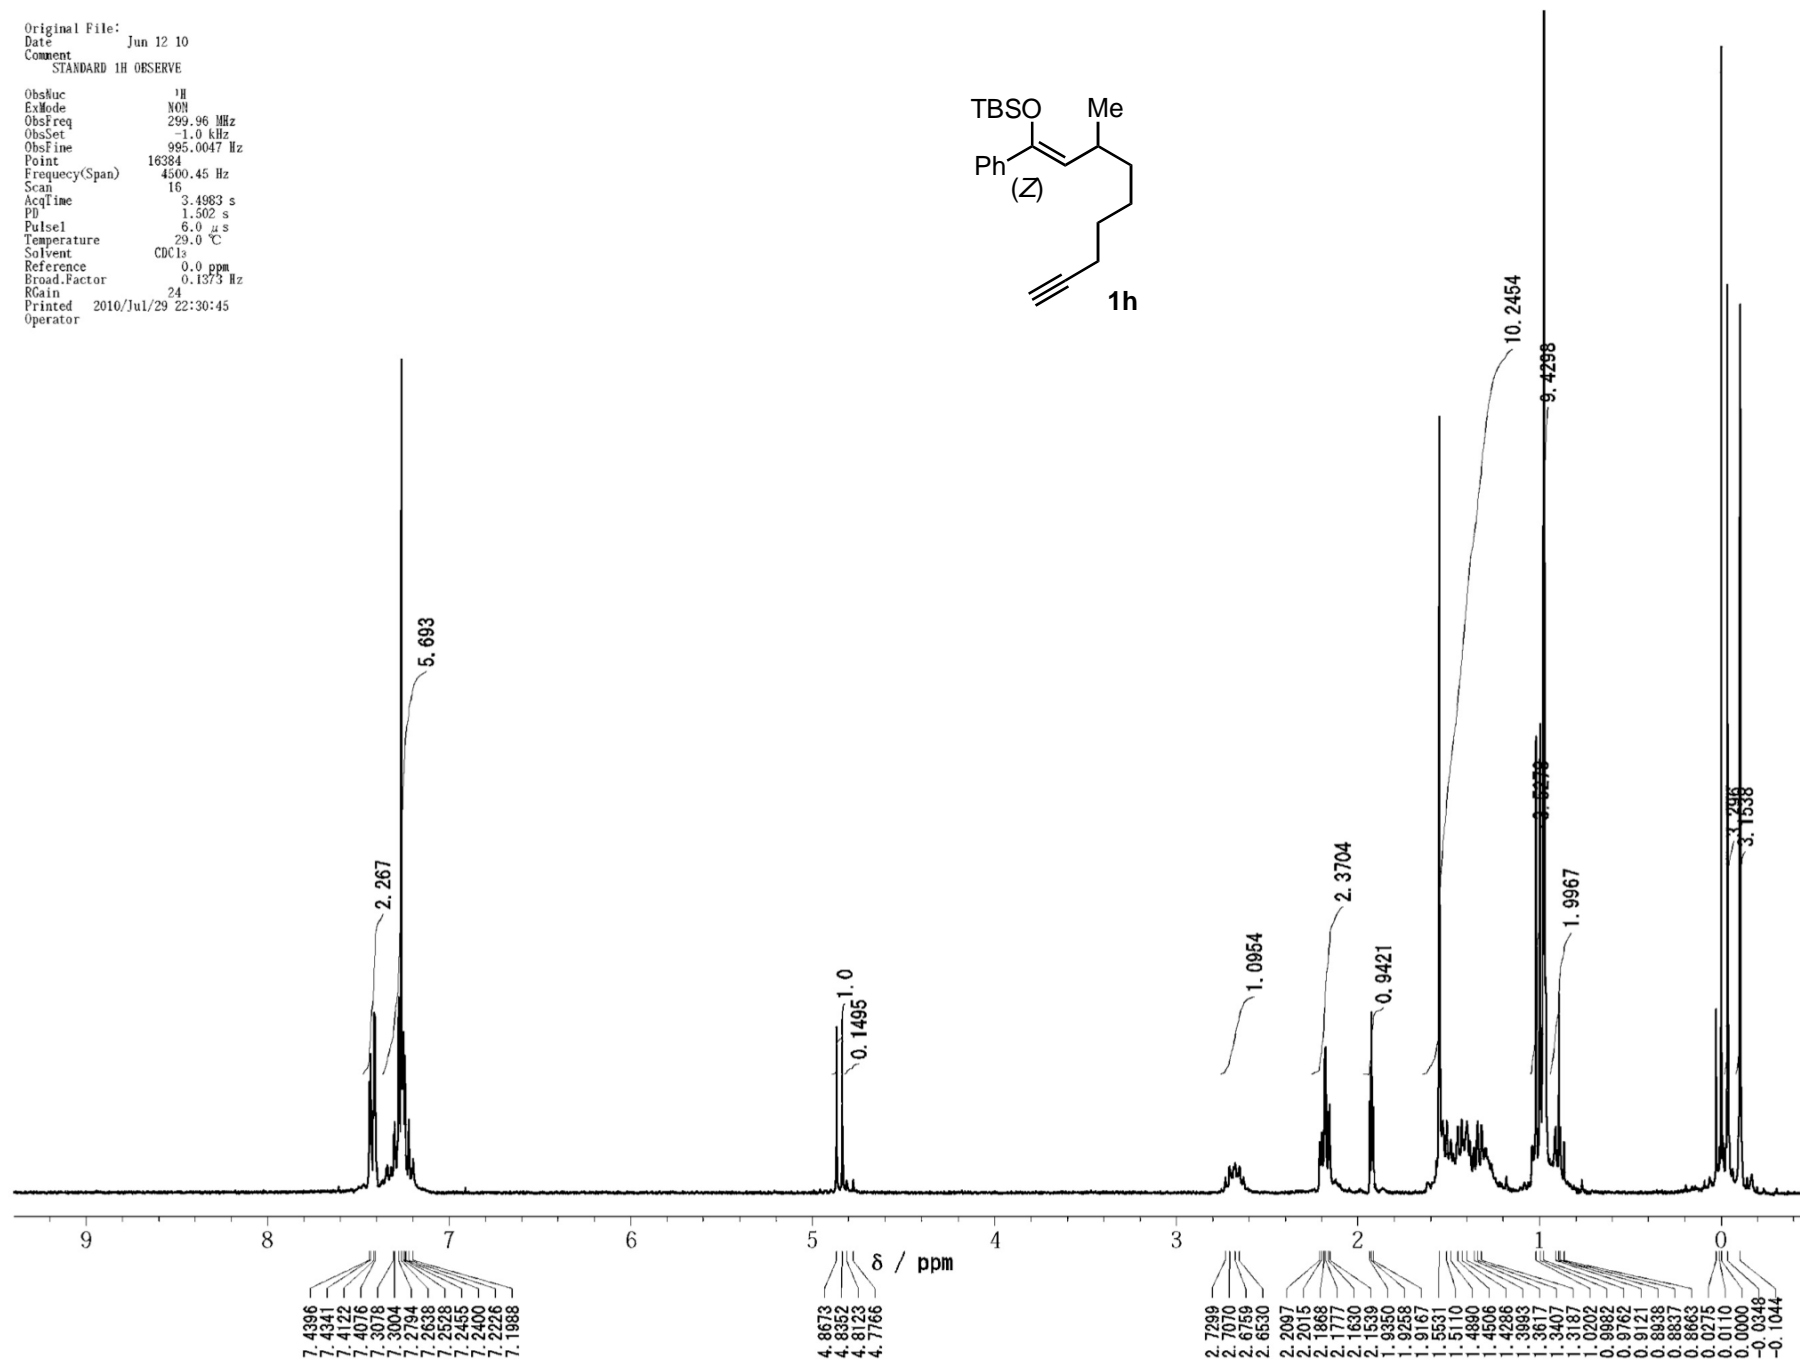

Original File:  
Date Jun 12 10  
Comment  
C13 Standard Observe  
Stick=none Tune=6.4 Match=0.4

ObsRoc 13C  
ExMode NOM  
ObsFreq 75.43 MHz  
ObsSet -1.0 kHz  
ObsFine 996.3672 Hz  
Point 32768  
Frequency(Span) 18761.73 Hz  
Scan 128  
AcqTime 1.4992 s  
PD 1.501 s  
Pulse1 6.0  $\mu$ s  
Temperature 29.0  $^{\circ}$ C  
Solvent CDCl<sub>3</sub>  
Reference 77.0 ppm  
Broad.Factor 0.2863 Hz  
RGain 30  
Printed 2010/Jul/29 22:32:04  
Operator

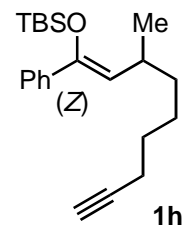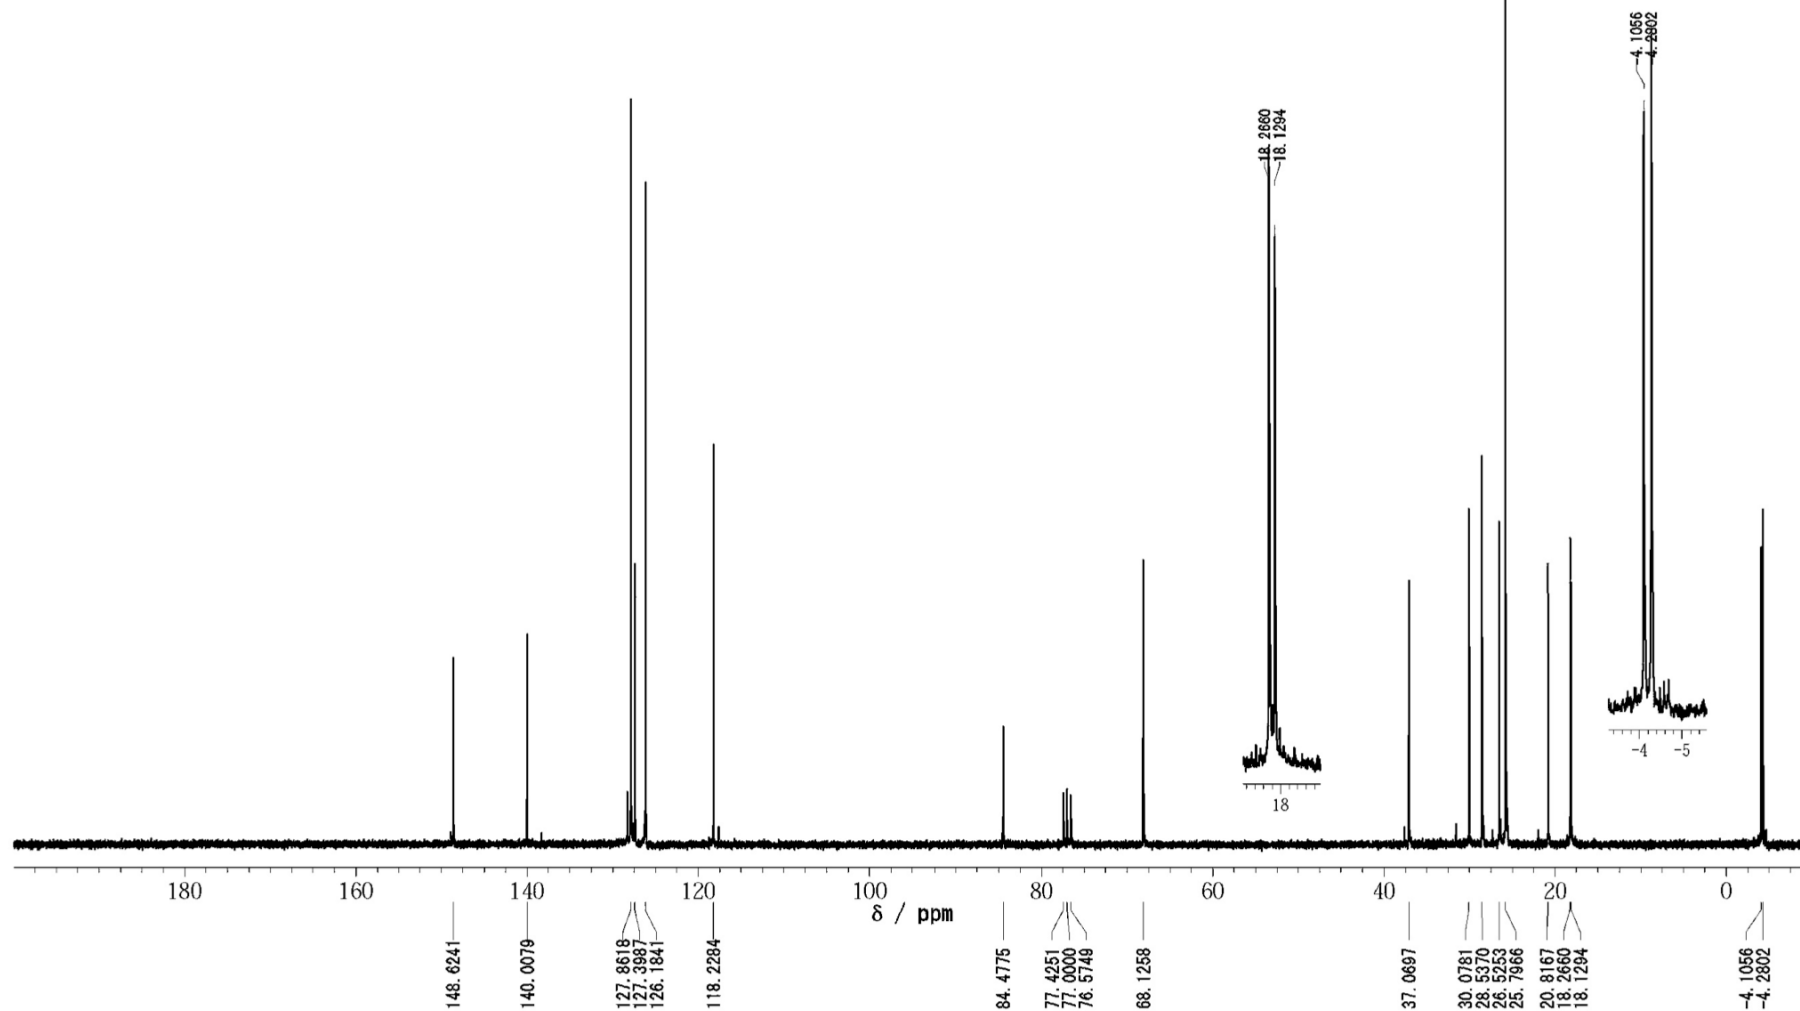

Original File:  
Date 10/Jun/2012 00:00:00  
Comment  
STANDARD 1H OBSERVE

ObsRuoc 1H  
ExMode NMR  
ObsFreq 299.96 MHz  
ObsSet -1.0 kHz  
ObsFine 995.0047 Hz  
Point 16384  
Frequency(Span) 4500.45 Hz  
Scan 16  
AcqTime 3.4983 s  
PD 1.502 s  
Pulse1 6.0  $\mu$ s  
Temperature 29.0  $^{\circ}$ C  
Solvent CDCl<sub>3</sub>  
Reference 0.0 ppm  
Broad.Factor 0.1373 Hz  
RGain 24  
Printed 2010/Jul/30 09:26:04  
Operator

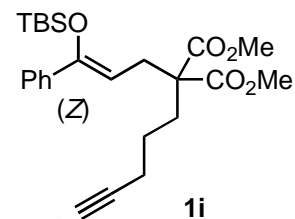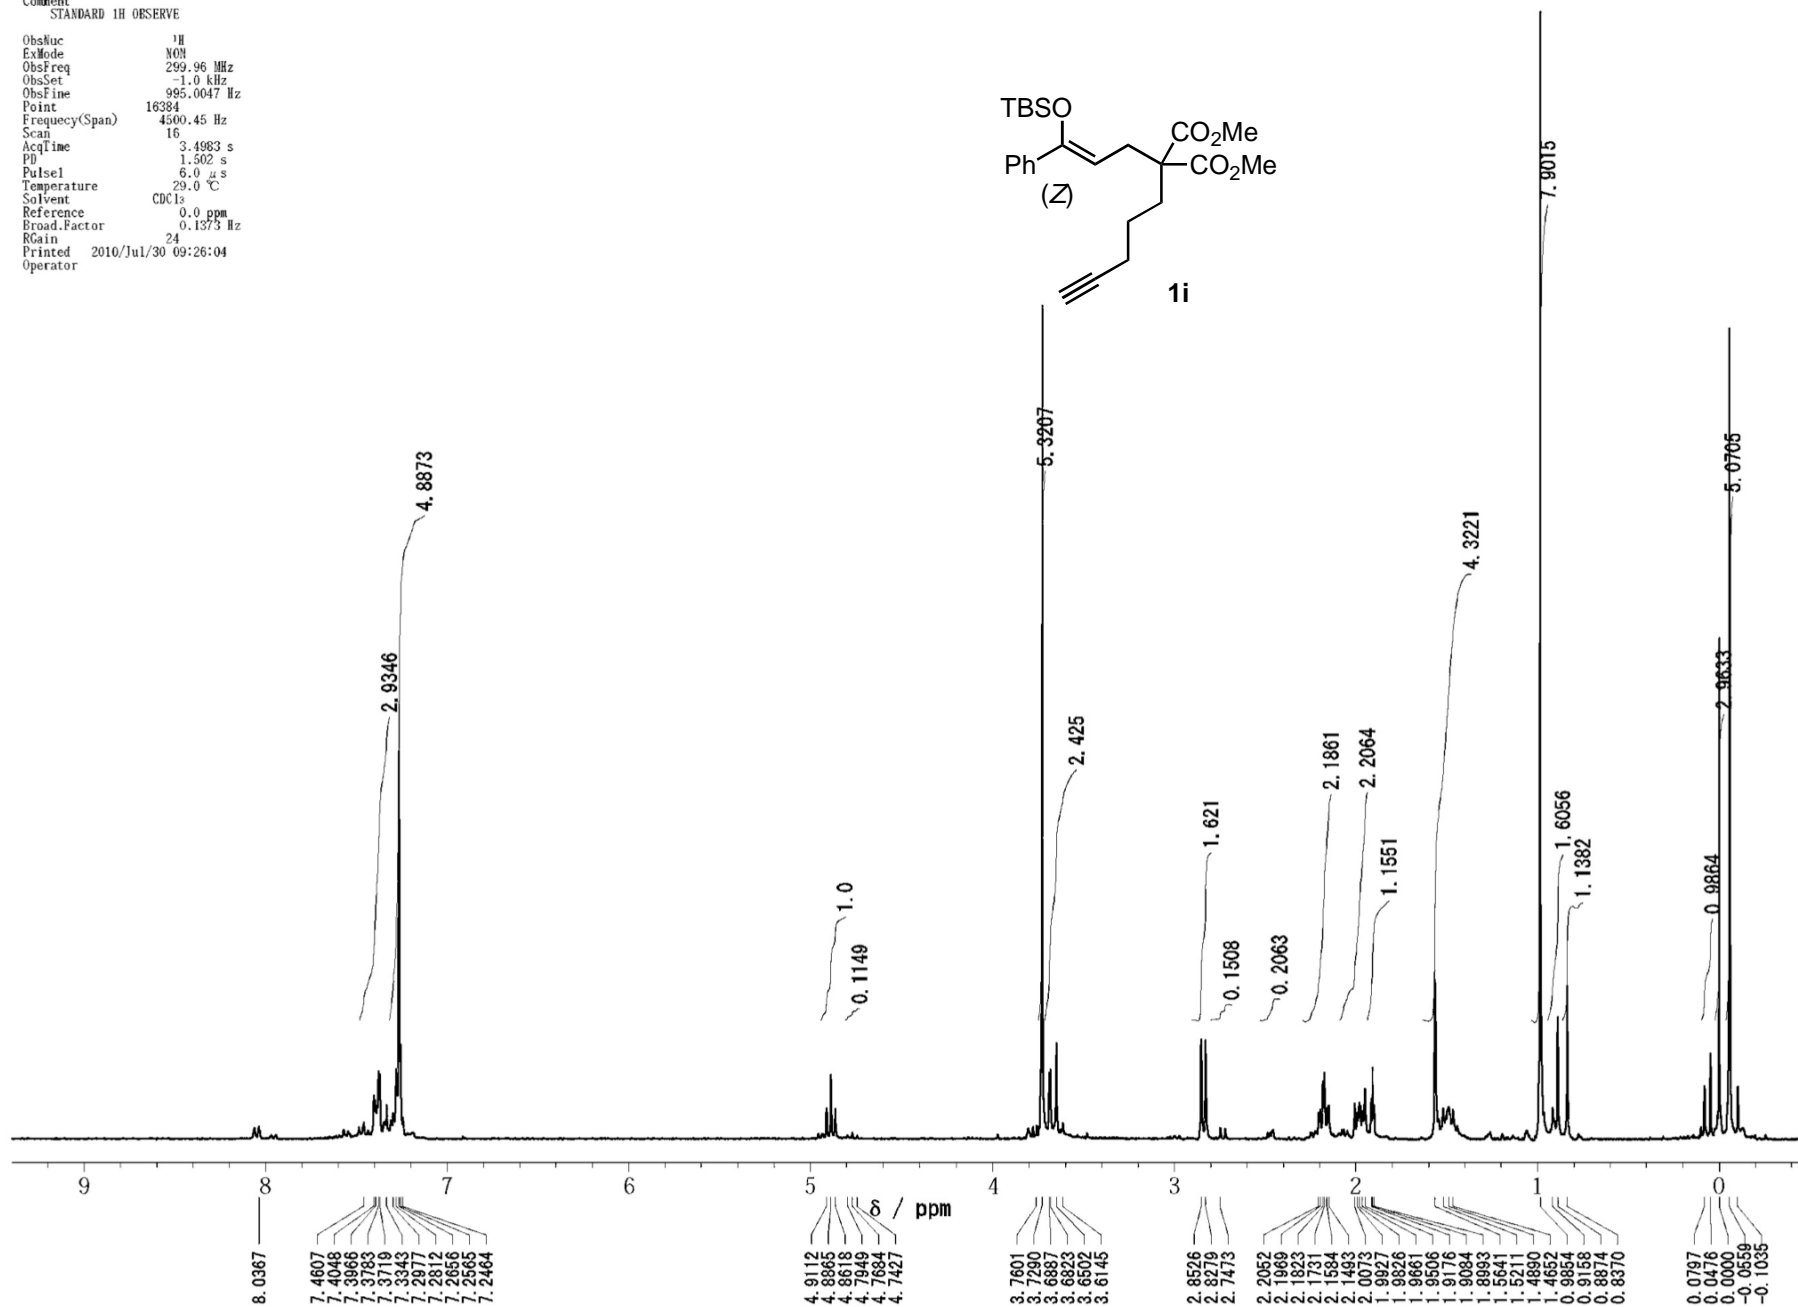



Original File:  
 Date Jun 12 10  
 Comment C13 Standard Observe  
 Stick=none Tune=6.4 Match=0.4

ObsRuc 13C  
 ExMode NOM  
 ObsFreq 75.43 MHz  
 ObsSet -1.0 kHz  
 ObsFine 996.3672 Hz  
 Point 32768  
 Frequency(Span) 18761.73 Hz  
 Scan 120  
 AcqTime 1.4992 s  
 PD 1.501 s  
 Pulse 6.0  $\mu$ s  
 Temperature 29.0  $^{\circ}$ C  
 Solvent CDCl<sub>3</sub>  
 Reference 77.0 ppm  
 Broad.Factor 0.2863 Hz  
 RGain 30  
 Printed 2010/Jul/30 09:29:28  
 Operator

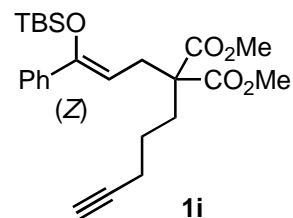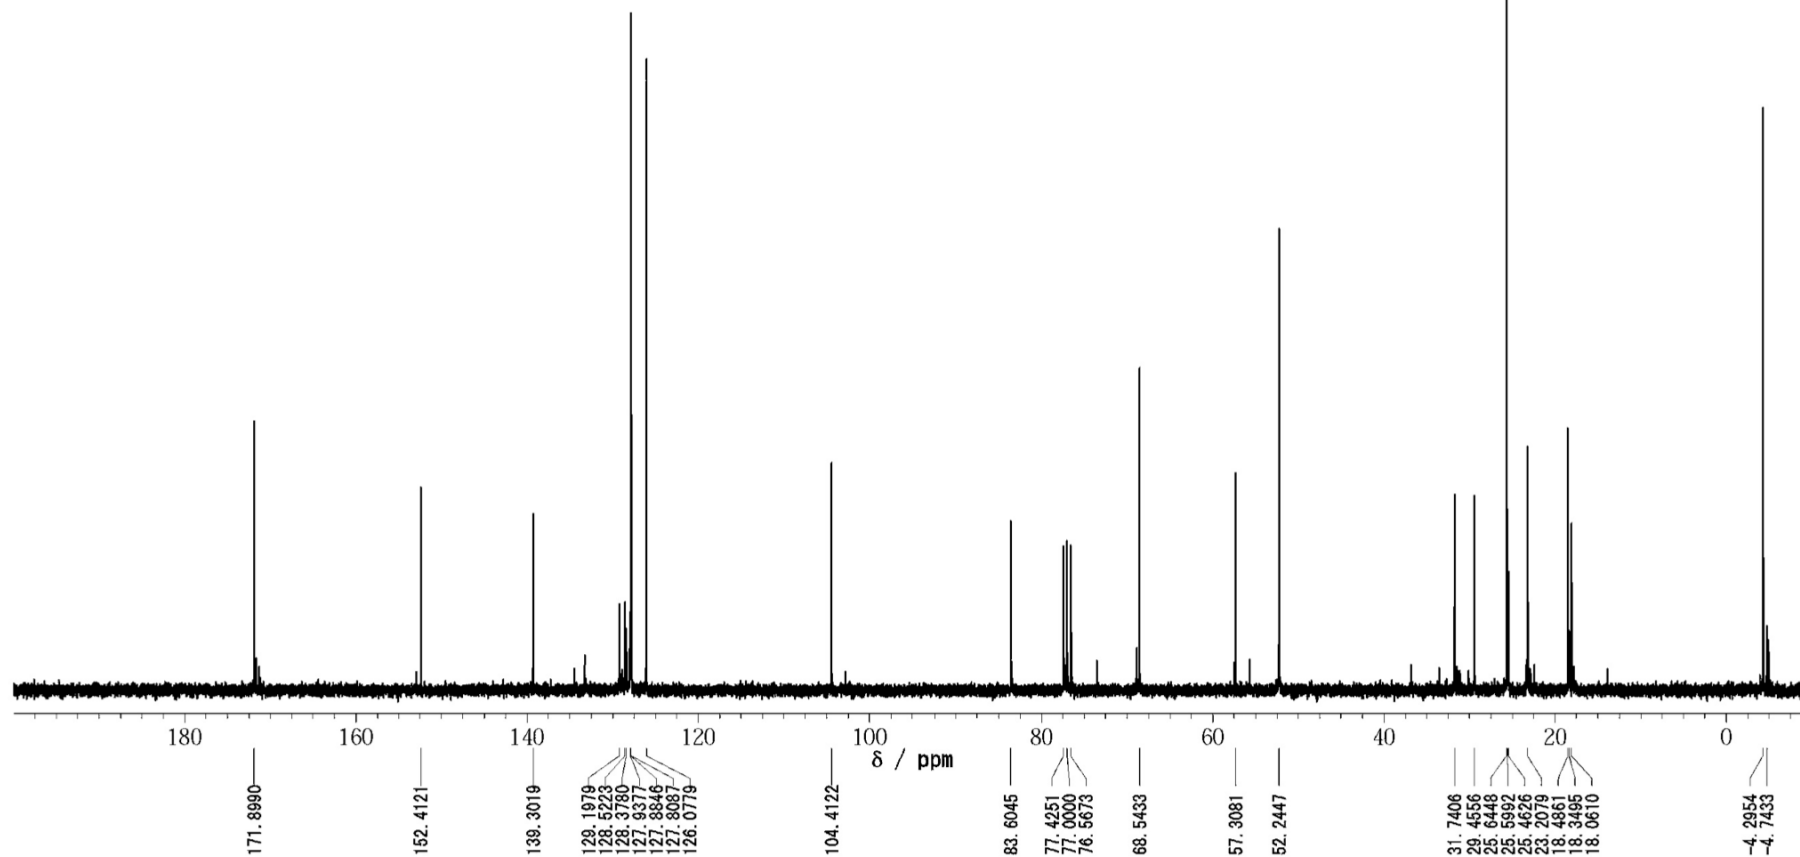

Original File:   
 Date Jun 29 10   
 Comment STANDARD 1H OBSERVE   
 ObsMod 1H   
 ExMode NMR   
 ObsFreq 299.96 MHz   
 ObsSet -1.0 kHz   
 ObsFine 995.0047 Hz   
 Point 16384   
 Frequency(Span) 4500.45 Hz   
 Scan 32   
 AcqTime 3.4983 s   
 PD 1.502 s   
 Pulse1 6.0  $\mu$ s   
 Temperature 29.0  $^{\circ}$ C   
 Solvent CDCl<sub>3</sub>   
 Reference 0.0 ppm   
 Broad.Factor 0.1373 Hz   
 RGain 30   
 Printed 2010/Jul/30 09:39:41   
 Operator

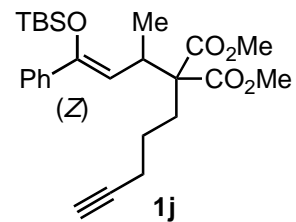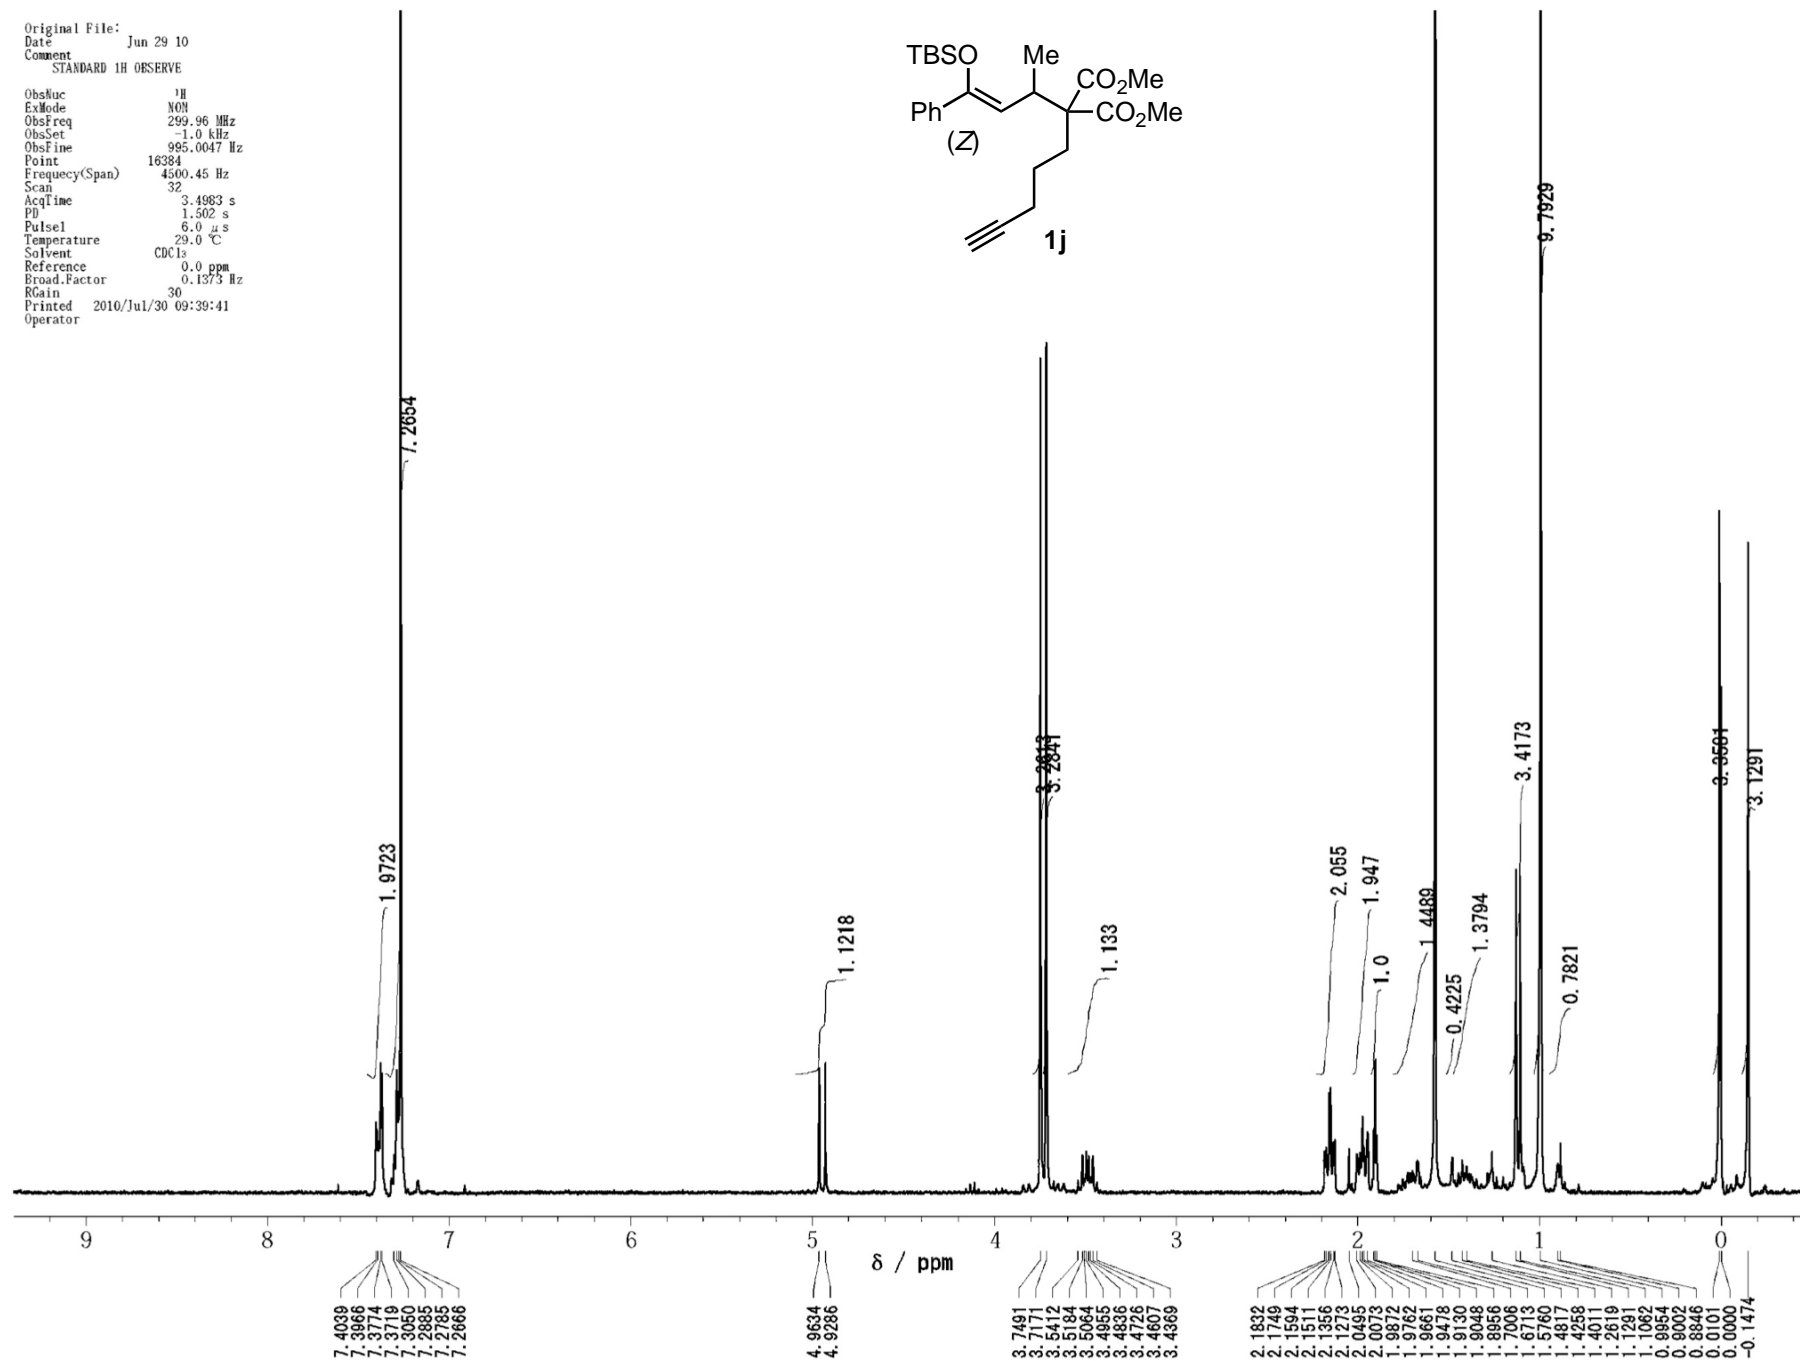

Original File:  
 Date Jun 29 10  
 Comment  
 C13 Statdard Observe  
 Stick=none Tune=6.4 Match=0.4

ObsRuc 13C  
 ExMode NOM  
 ObsFreq 75.43 MHz  
 ObsSet -1.0 kHz  
 ObsFine 996.3672 Hz  
 Point 32768  
 Frequency(Span) 18761.73 Hz  
 Scan 56  
 AcqTime 1.4992 s  
 PD 1.501 s  
 Pulse 6.0  $\mu$ s  
 Temperature 29.0  $^{\circ}$ C  
 Solvent CDCl<sub>3</sub>  
 Reference 77.0 ppm  
 Broad.Factor 0.2863 Hz  
 RGain 30  
 Printed 2010/Jul/30 09:41:08  
 Operator

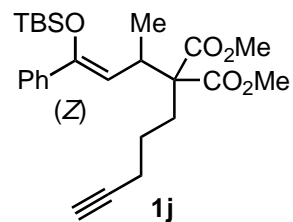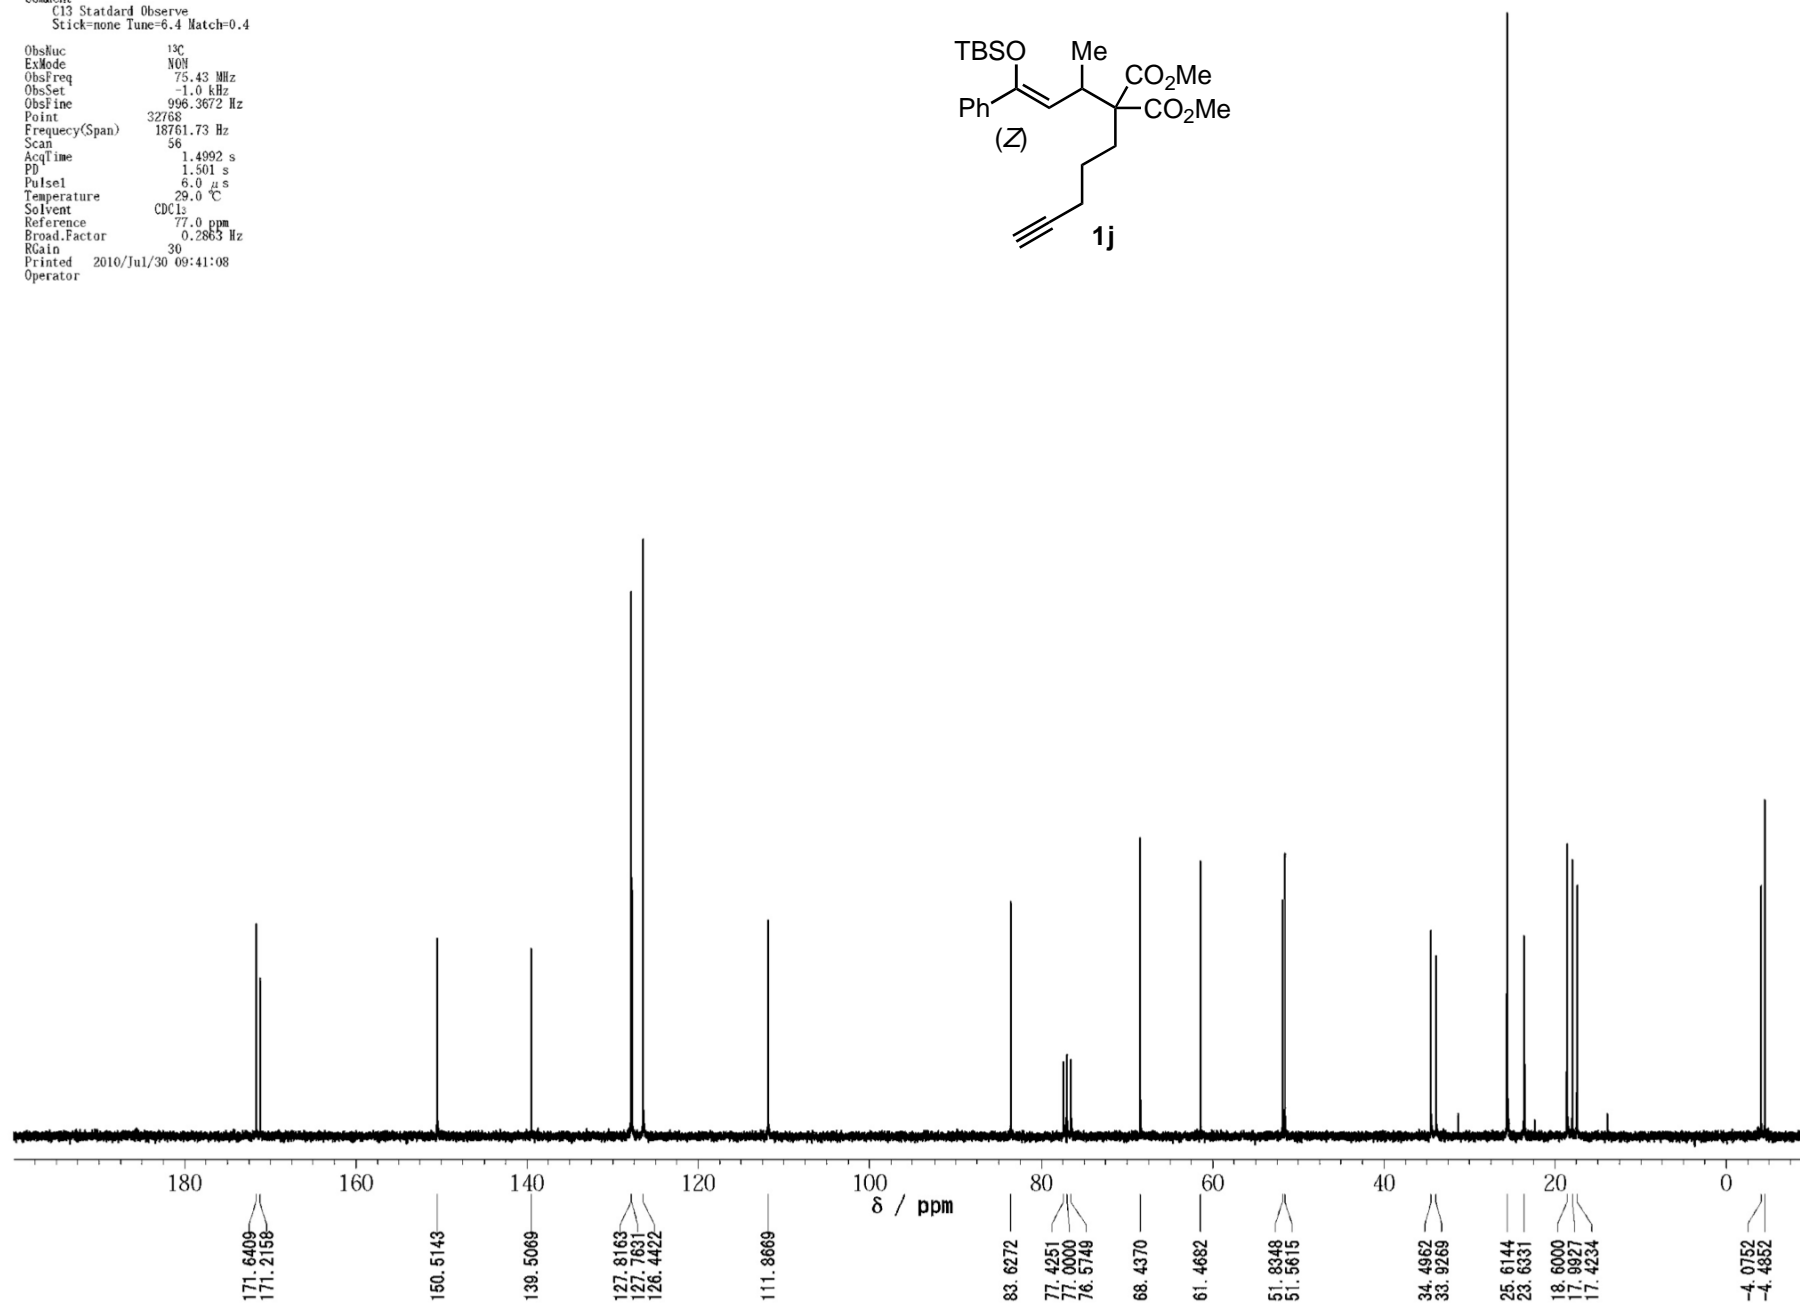

Original File:  
Date Feb 23 10  
Comment  
STANDARD 1H OBSERVE

ObsMod 1H  
ExMode NOE  
ObsFreq 299.96 MHz  
ObsSet -1.0 kHz  
ObsFine 995.0047 Hz  
Point 16384  
Frequency(Span) 4500.45 Hz  
Scan 16  
AcqTime 3.4983 s  
PD 1.502 s  
Pulse1 6.0  $\mu$ s  
Temperature 29.0  $^{\circ}$ C  
Solvent CDCl<sub>3</sub>  
Reference 0.0 ppm  
Broad.Factor 0.1373 Hz  
RGain 19  
Printed 2010/Jul/30 09:51:16  
Operator

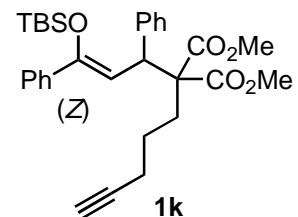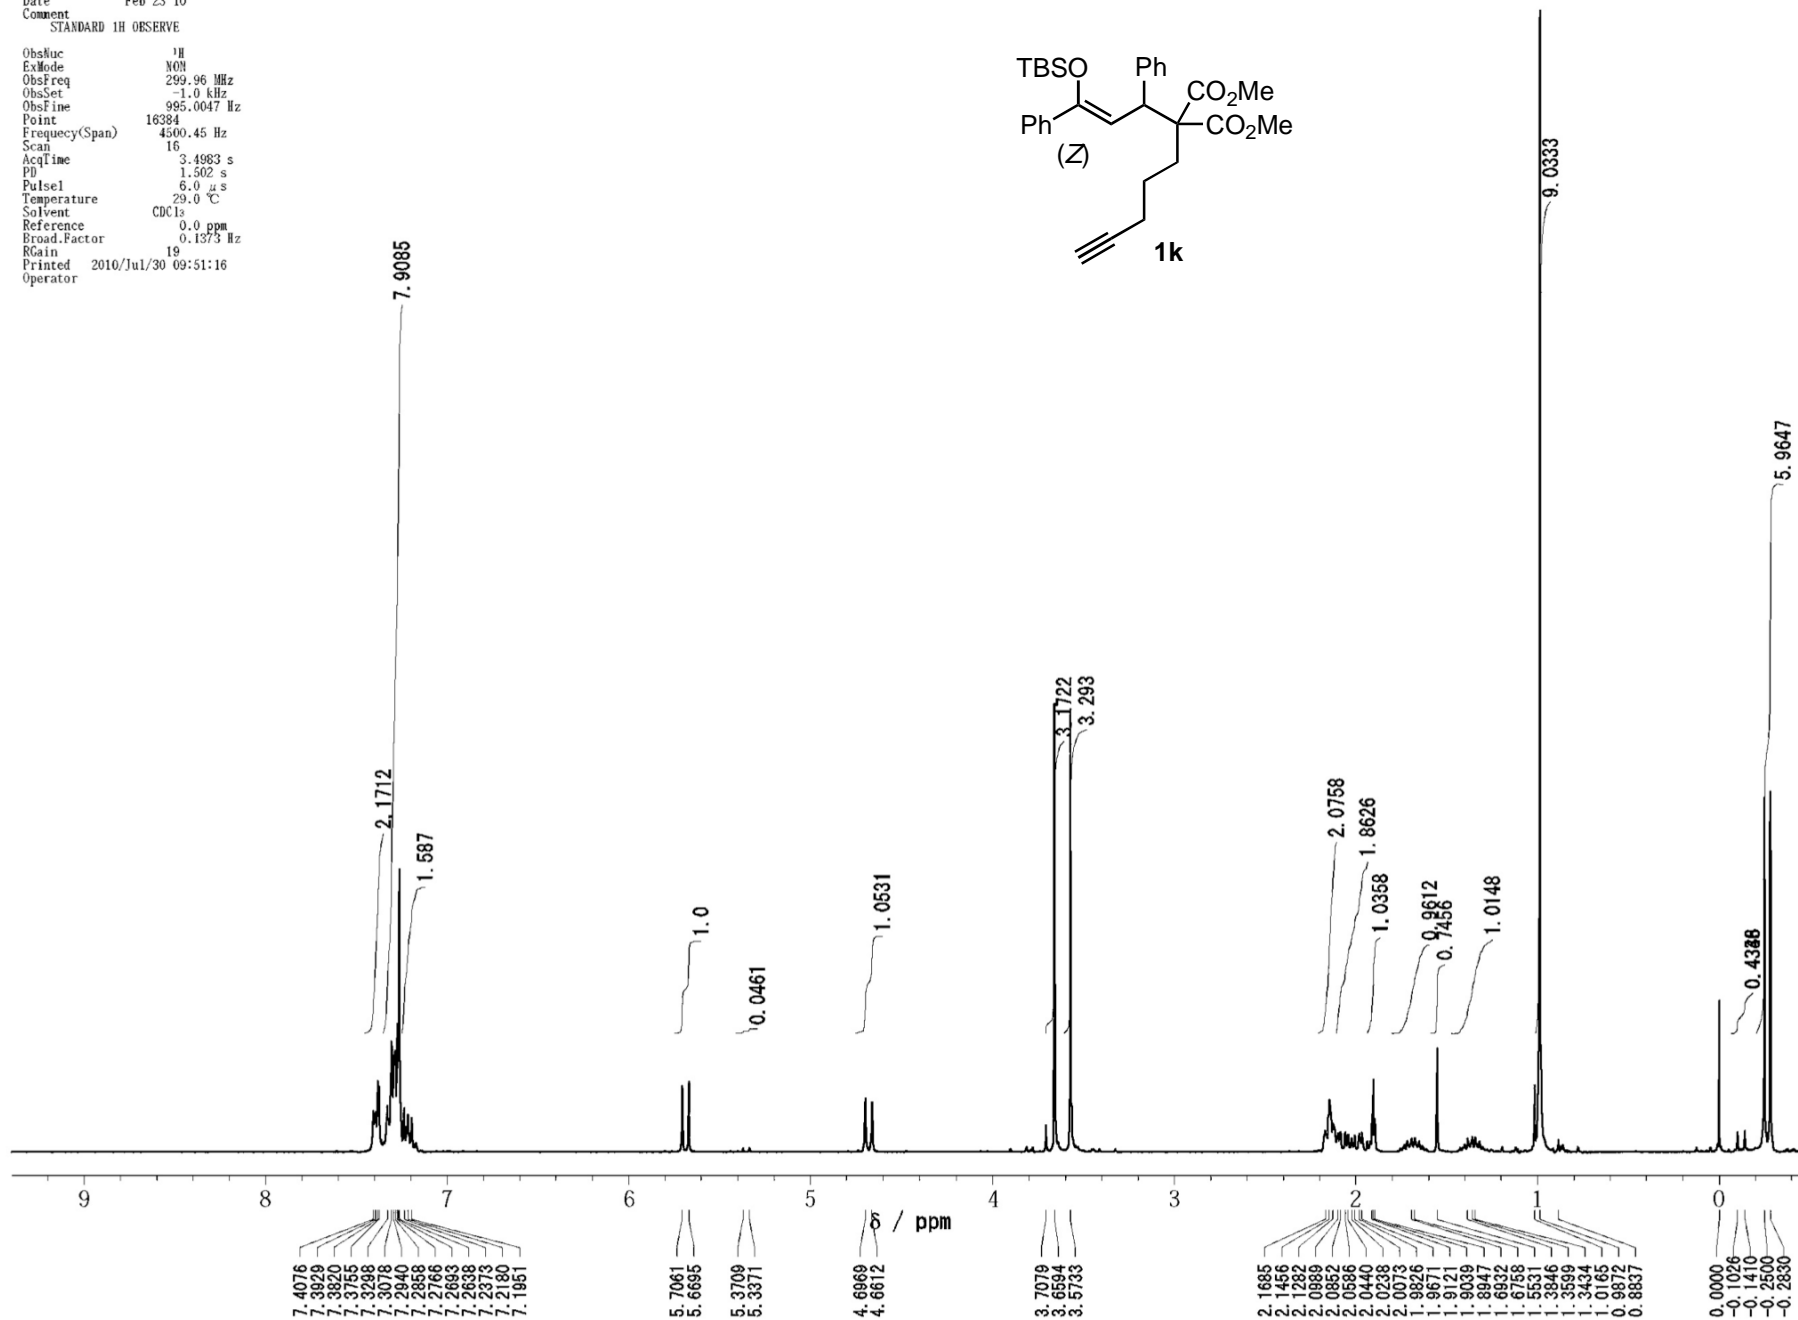

Original File:  
 Date Feb 23 10  
 Comment C13 Standard Observe  
 Stick=none Tune=6.4 Match=0.4

ObsRoc 13C  
 ExMode NOM  
 ObsFreq 75.43 MHz  
 ObsSet -1.0 kHz  
 ObsFine 996.3672 Hz  
 Point 32768  
 Frequency(Span) 18761.73 Hz  
 Scan 96  
 AcqTime 1.4992 s  
 PD 1.501 s  
 Pulse 6.0  $\mu$ s  
 Temperature 29.0  $^{\circ}$ C  
 Solvent CDCl<sub>3</sub>  
 Reference 77.0 ppm  
 Broad.Factor 0.2863 Hz  
 RGain 30  
 Printed 2010/Jul/30 09:53:43  
 Operator

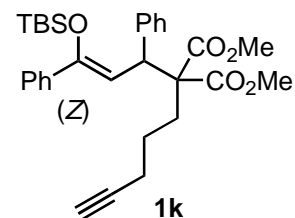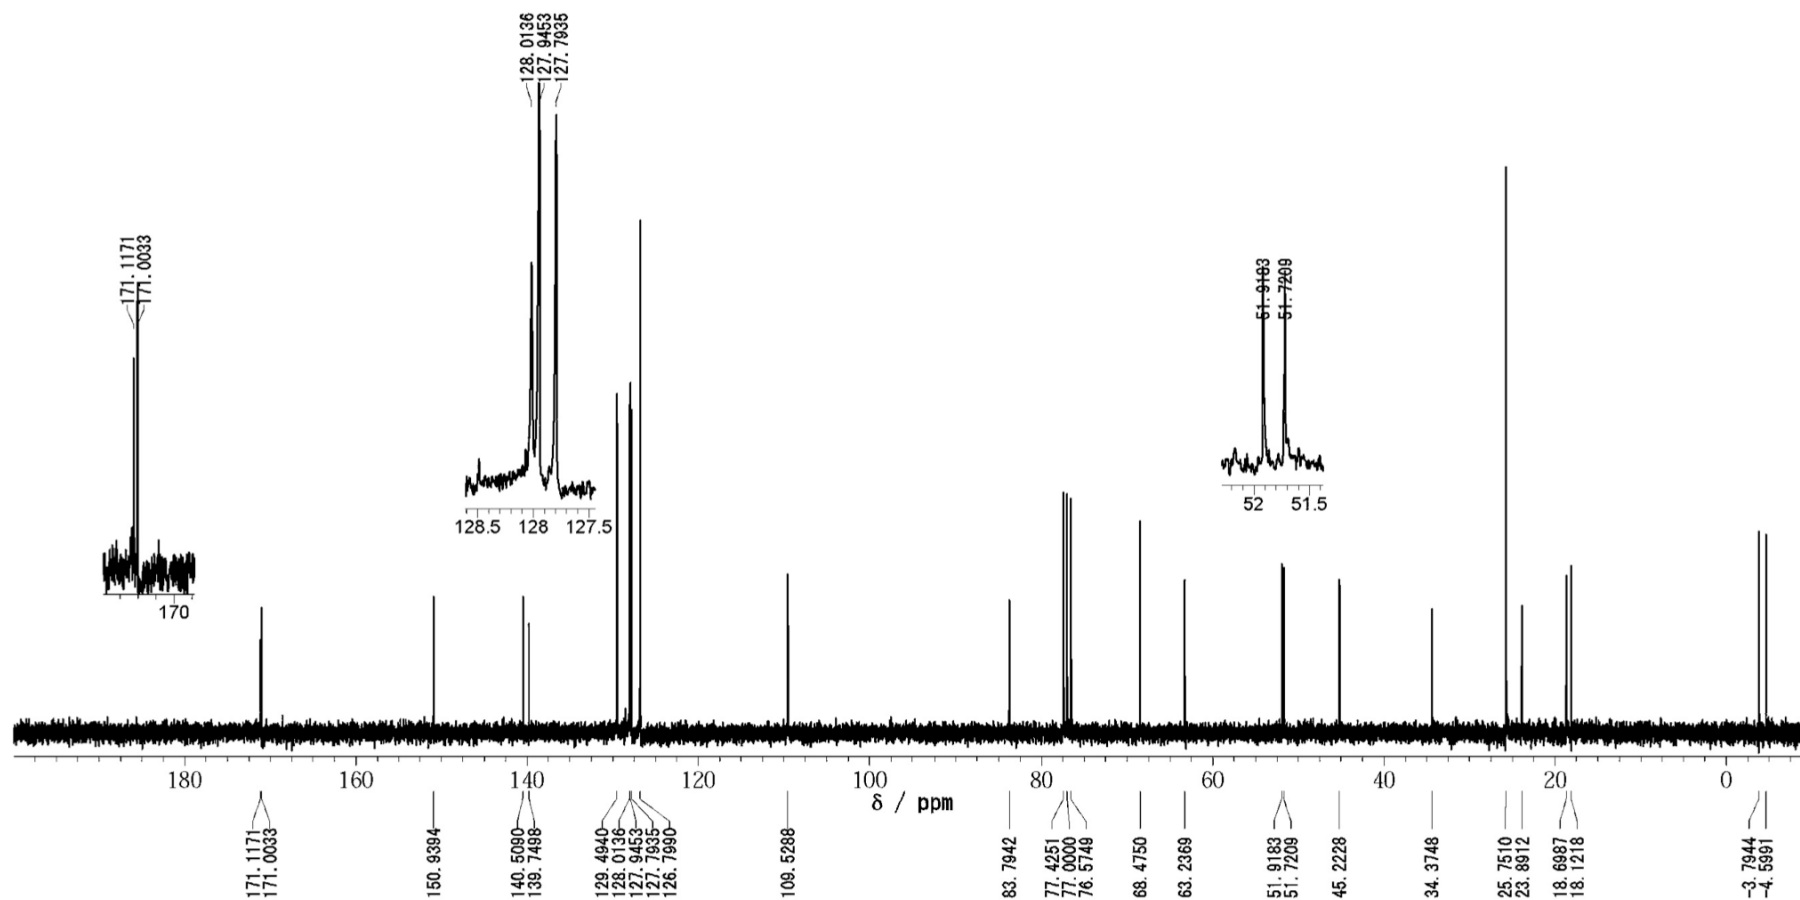

Original File:  
 Date Jun 15 10  
 Comment  
 STANDARD 1H OBSERVE  
 ObsRuoc 1H  
 ExMode NMR  
 ObsFreq 299.96 MHz  
 ObsSet -1.0 kHz  
 ObsFine 995.0047 Hz  
 Point 16384  
 Frequency(Span) 4500.45 Hz  
 Scan 32  
 AcqTime 3.4983 s  
 PD 1.502 s  
 Pulse1 6.0  $\mu$ s  
 Temperature 29.0  $^{\circ}$ C  
 Solvent CDCl<sub>3</sub>  
 Reference 0.0 ppm  
 Broad.Factor 0.1373 Hz  
 RGain 24  
 Printed 2010/Jul/30 13:27:38  
 Operator

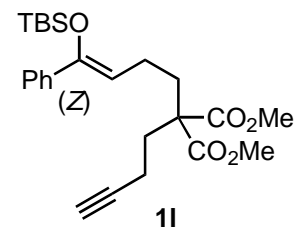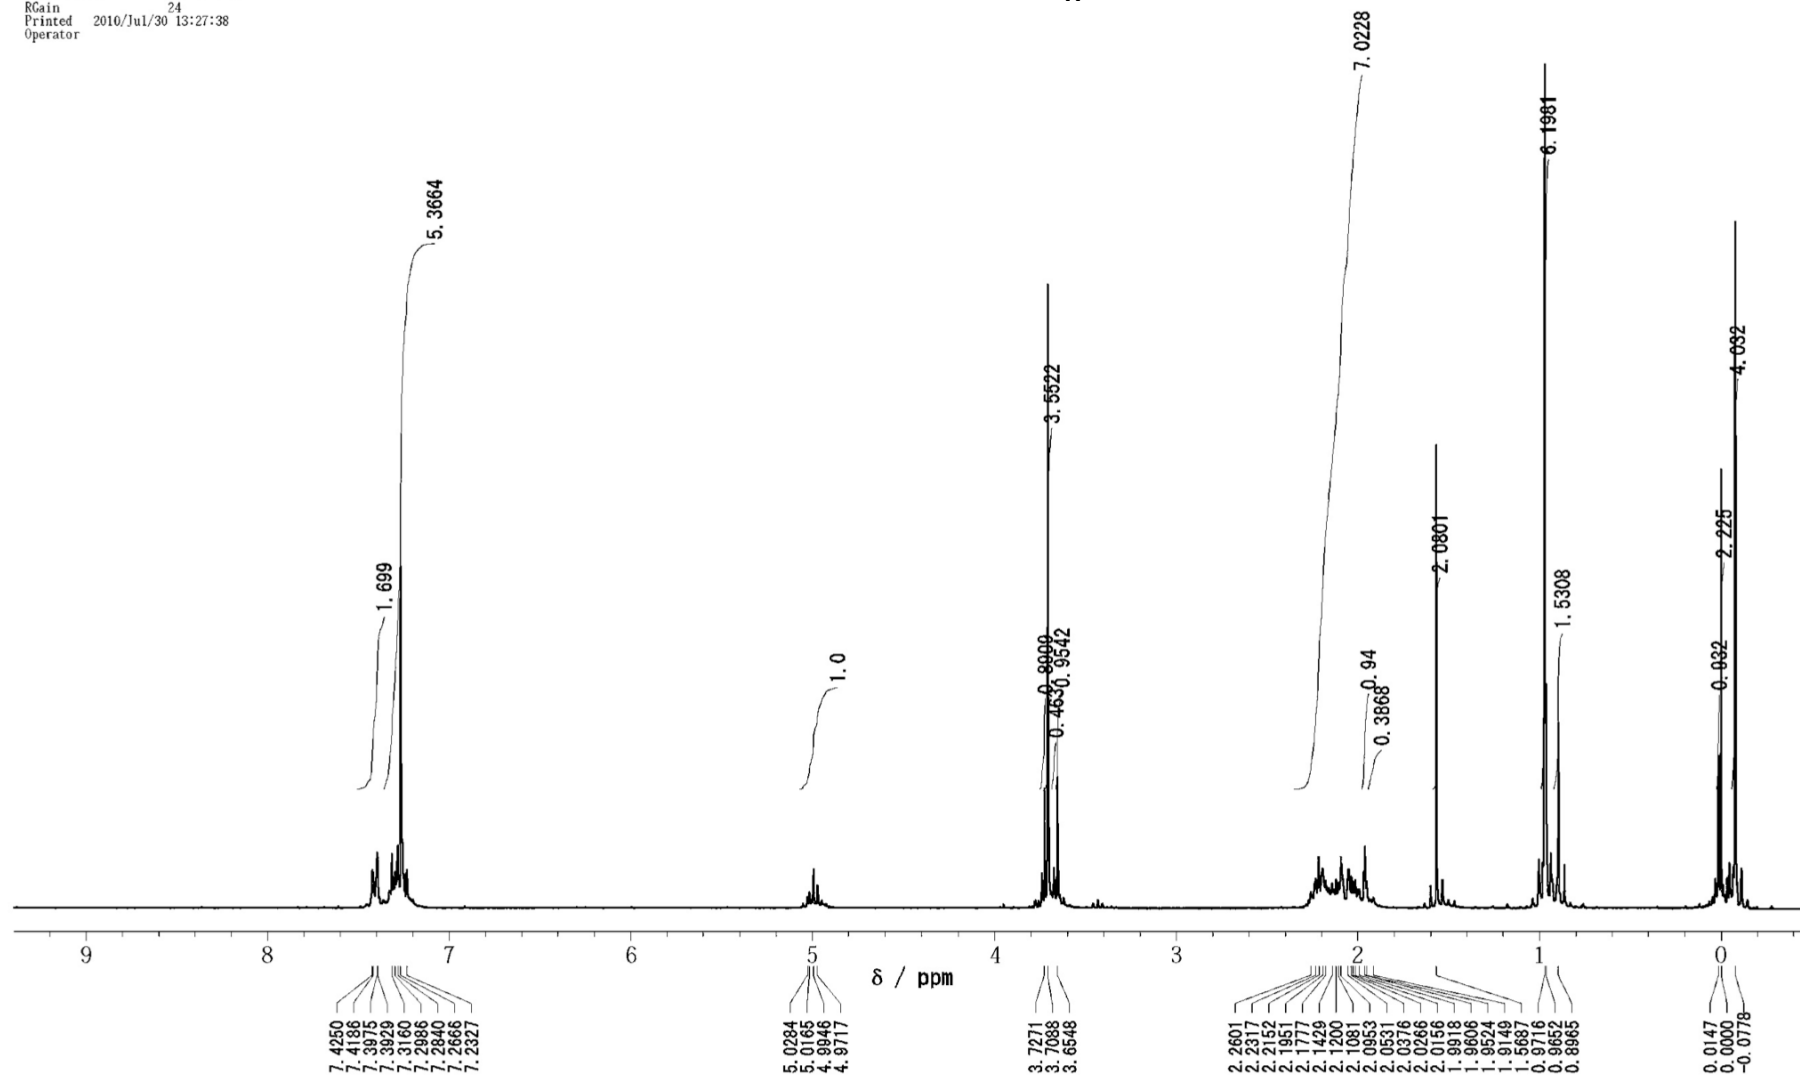

Original File:  
 Date Jun 15 10  
 Comment C13 Standard Observe  
 Stick=none Tune=6.4 Match=0.4

ObsRoc 13C  
 ExMode NOM  
 ObsFreq 75.43 MHz  
 ObsSet -1.0 kHz  
 ObsFine 996.3672 Hz  
 Point 32768  
 Frequency(Span) 18761.73 Hz  
 Scan 128  
 AcqTime 1.4992 s  
 PD 1.501 s  
 Pulse 6.0  $\mu$ s  
 Temperature 29.0  $^{\circ}$ C  
 Solvent CDCl<sub>3</sub>  
 Reference 77.0 ppm  
 Broad.Factor 0.2863 Hz  
 RGain 30  
 Printed 2010/Jul/30 13:30:40  
 Operator

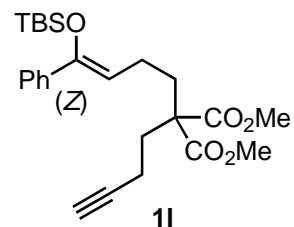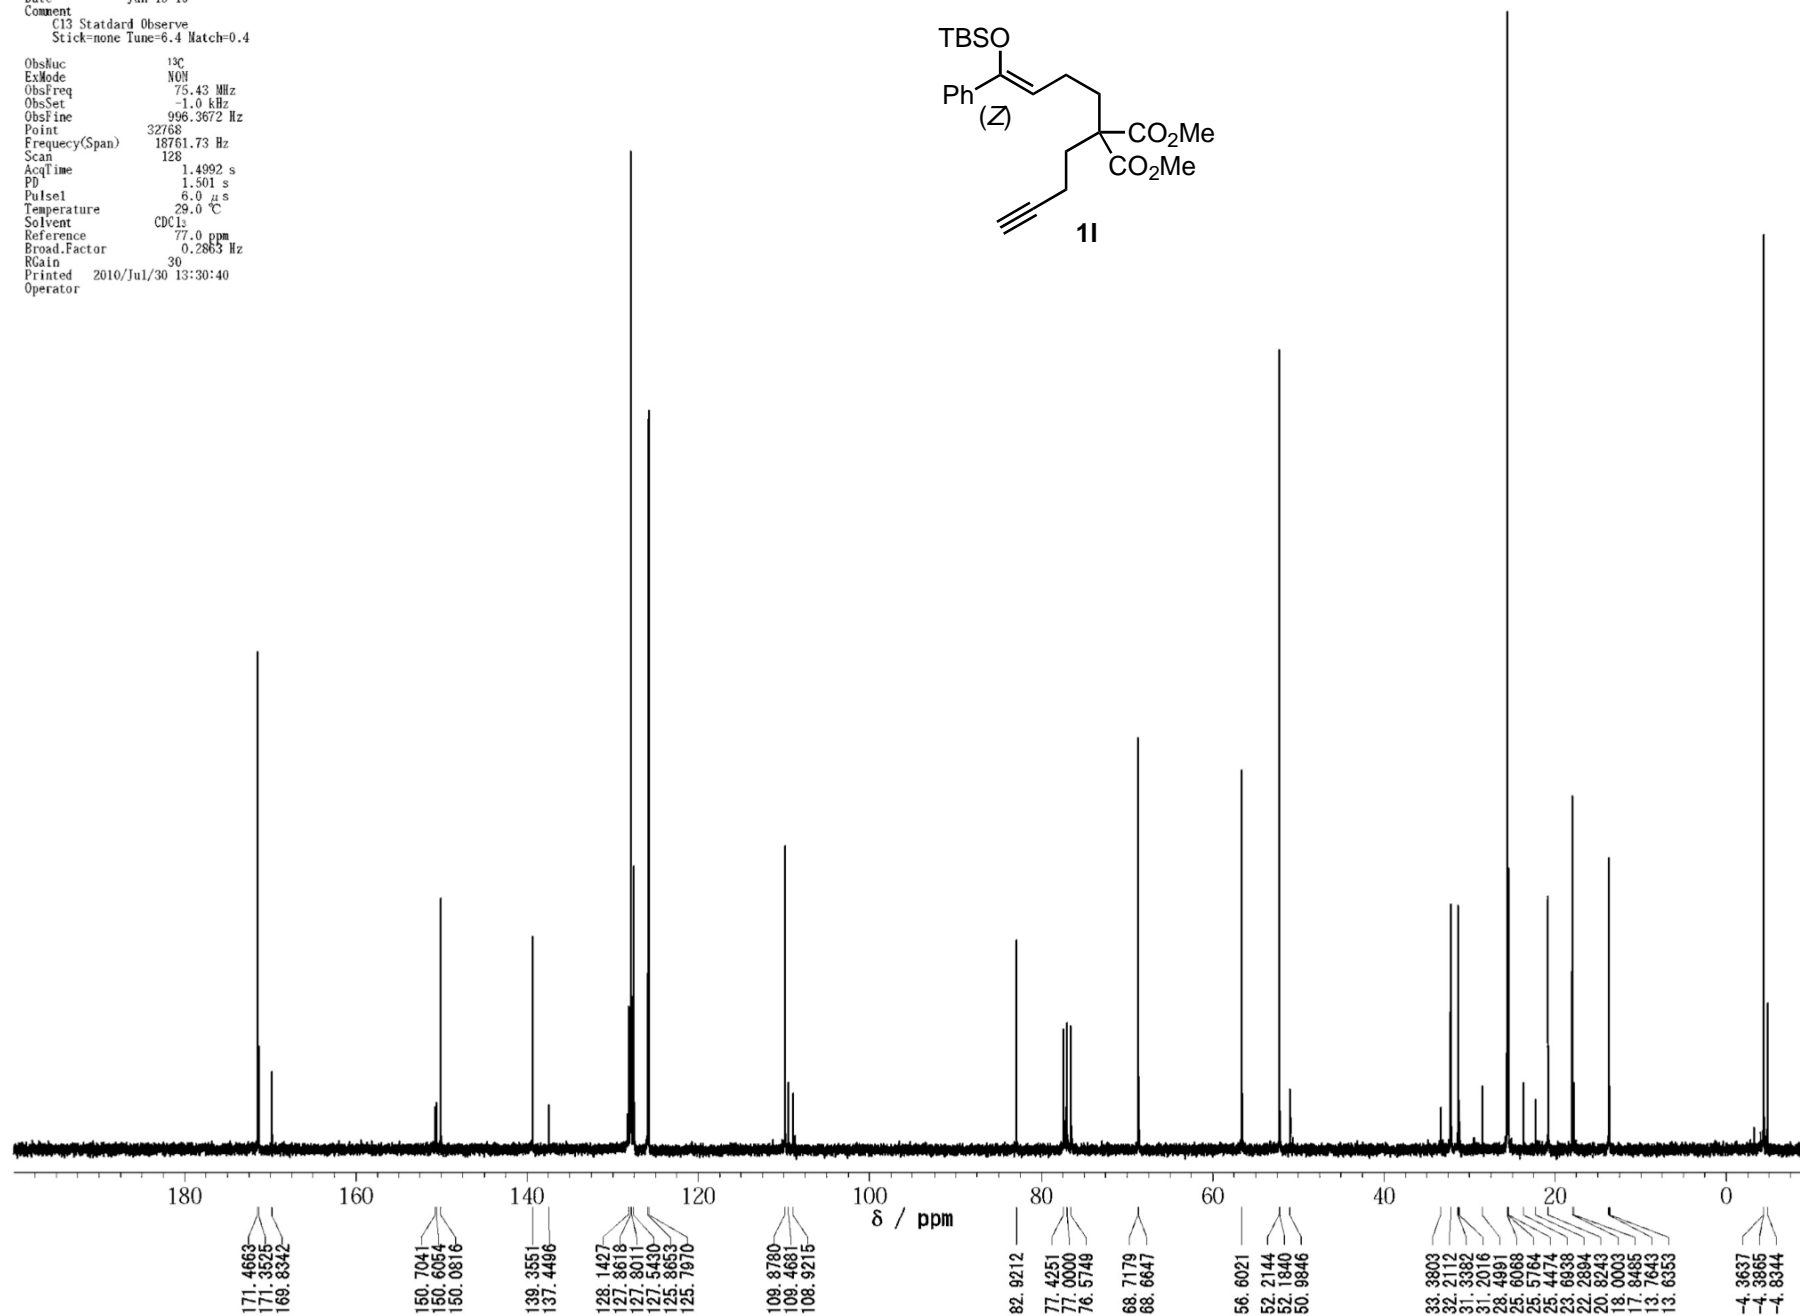

Original File:   
 Date Feb 23 10   
 Comment   
 STANDARD 1H OBSERVE   
 ObsMod 1H   
 ExMode NMR   
 ObsFreq 299.96 MHz   
 ObsSet -1.0 kHz   
 ObsFine 995.0047 Hz   
 Point 16384   
 Frequency(Span) 4500.45 Hz   
 Scan 16   
 AcqTime 3.4983 s   
 PD 1.502 s   
 Pulse1 6.0  $\mu$ s   
 Temperature 29.0  $^{\circ}$ C   
 Solvent CDCl<sub>3</sub>   
 Reference 0.0 ppm   
 Broad.Factor 0.1373 Hz   
 RGain 30   
 Printed 2010/Jul/30 10:32:47   
 Operator

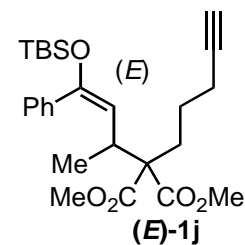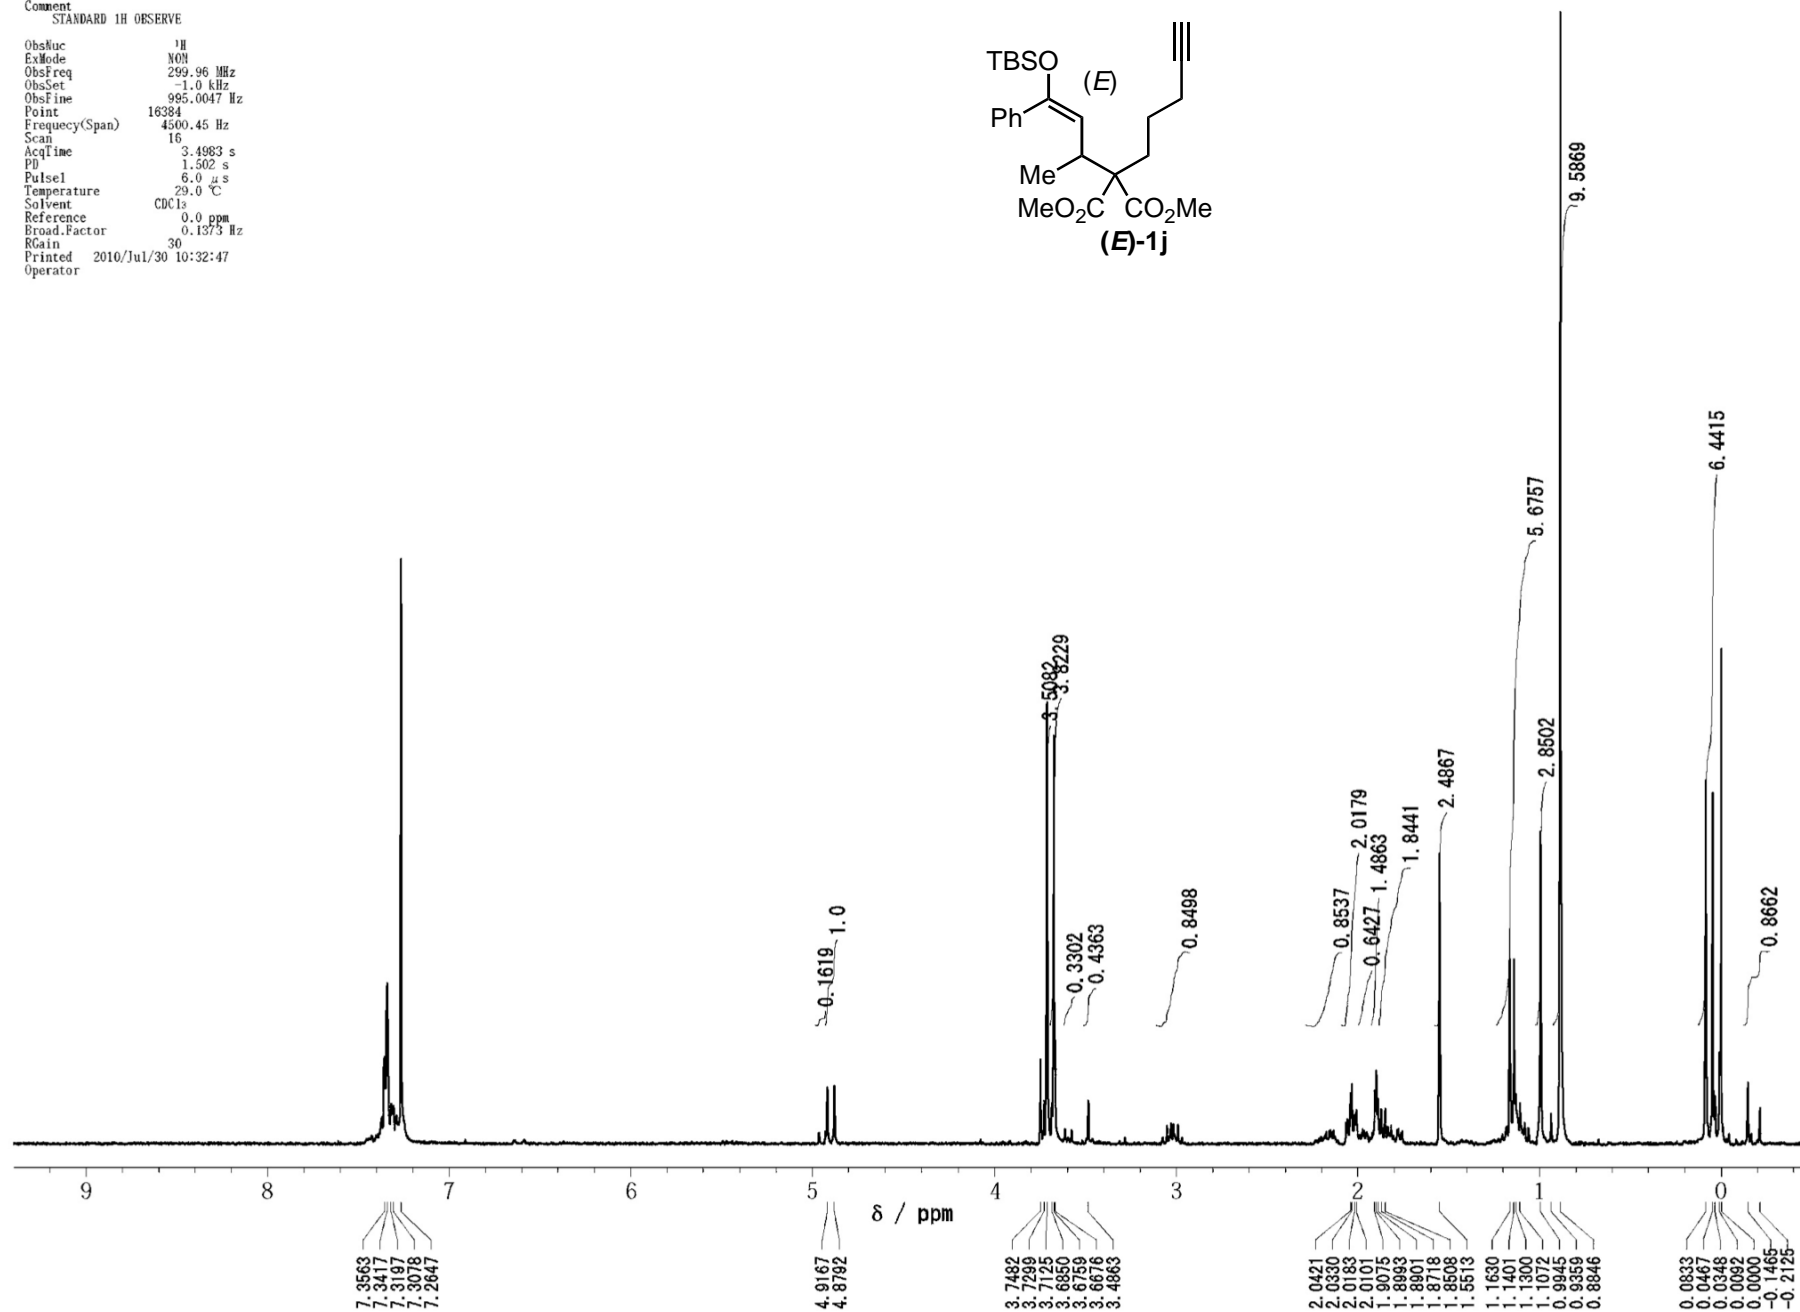



|                 |                      |
|-----------------|----------------------|
| ObsIduc         | 13C                  |
| ExMode          | NON                  |
| ObsFreq         | 75.43 MHz            |
| ObsSet          | 1.0 kHz              |
| ObsLine         | 996.3672 Hz          |
| Point           | 32768                |
| Frequency(Span) | 18761.73 Hz          |
| Scan            | 360                  |
| AcqTime         | 1.4992 s             |
| PD              | 1.501 s              |
| Pulse           | 6.0 $\mu$ s          |
| Temperature     | 29.0 $^{\circ}$ C    |
| Solvent         | CDCl <sub>3</sub>    |
| Reference       | 77.0 ppm             |
| Broad.Factor    | 0.2863 Hz            |
| RGain           | 30                   |
| Printed         | 2010/Jul/30 10:36:15 |
| Operator        |                      |

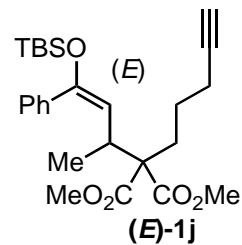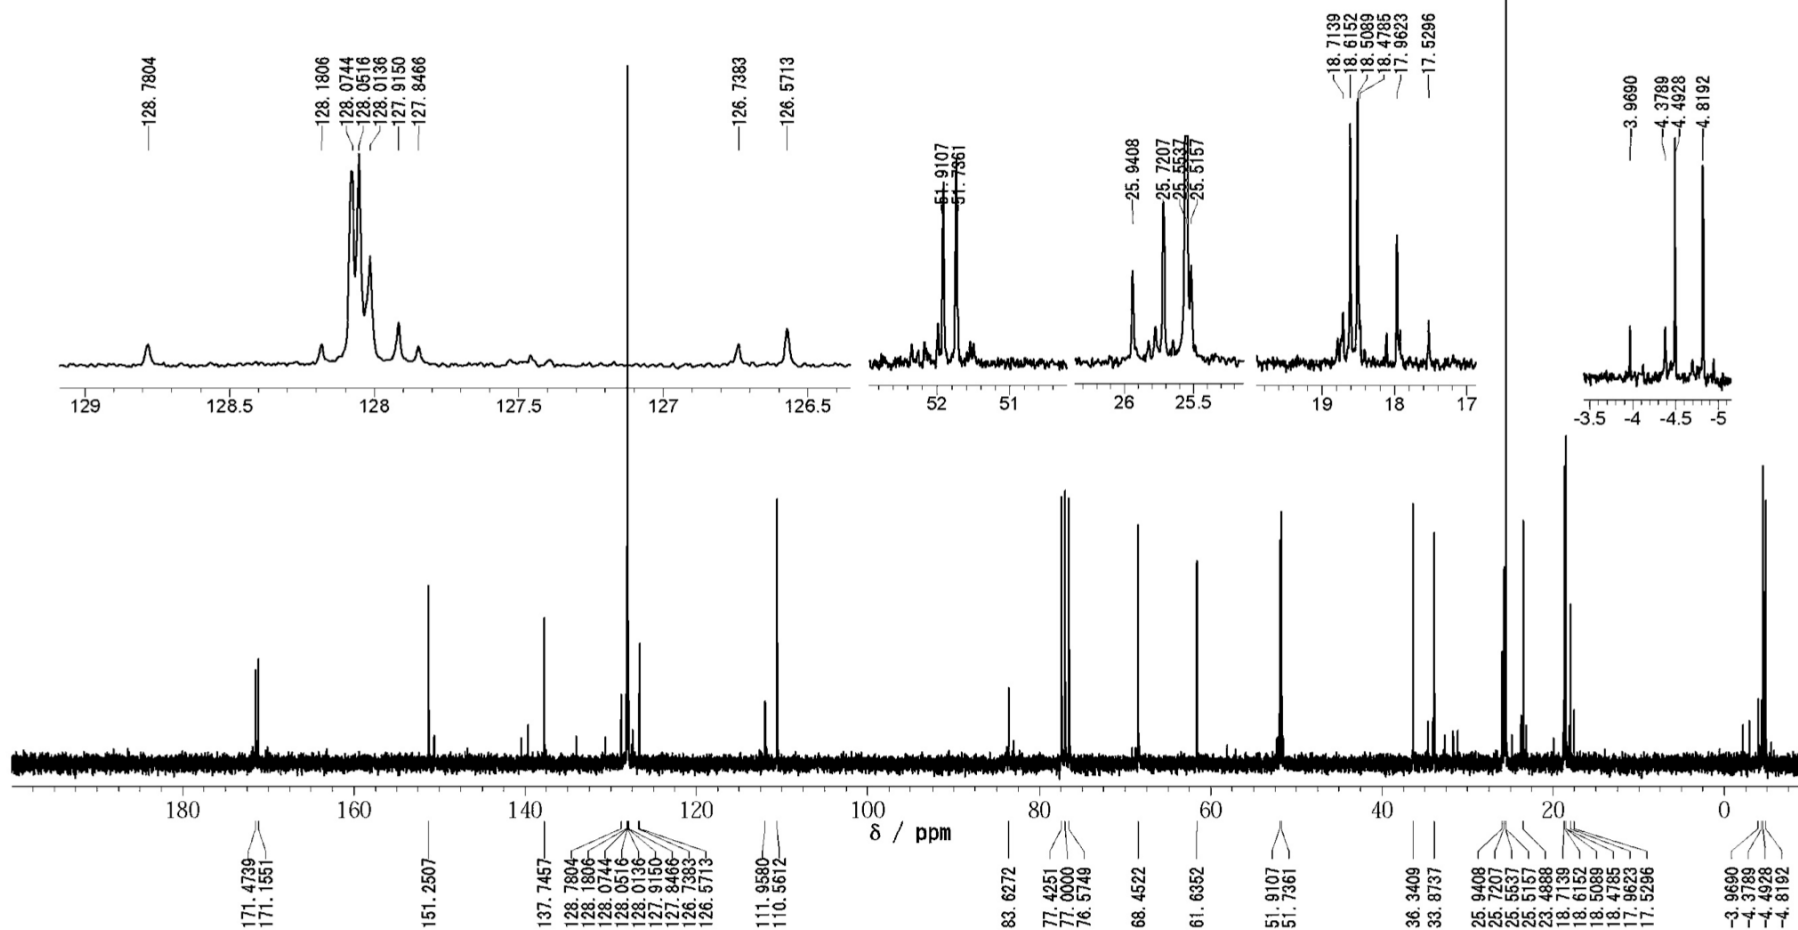

Original File:  
 Date Apr 9 10  
 Comment  
 STANDARD 1H OBSERVE  
 ObsMod 1H  
 ExMode NMR  
 ObsFreq 299.96 MHz  
 ObsSet -1.0 kHz  
 ObsFine 995.0047 Hz  
 Point 16384  
 Frequency(Span) 4500.45 Hz  
 Scan 16  
 AcqTime 3.4983 s  
 PD 1.502 s  
 Pulse1 6.0  $\mu$ s  
 Temperature 29.0  $^{\circ}$ C  
 Solvent CDCl<sub>3</sub>  
 Reference 0.0 ppm  
 Broad.Factor 0.1373 Hz  
 RGain 26  
 Printed 2010/Jul/30 13:55:08  
 Operator

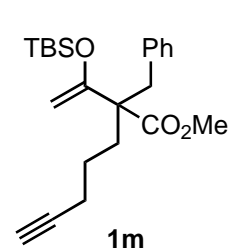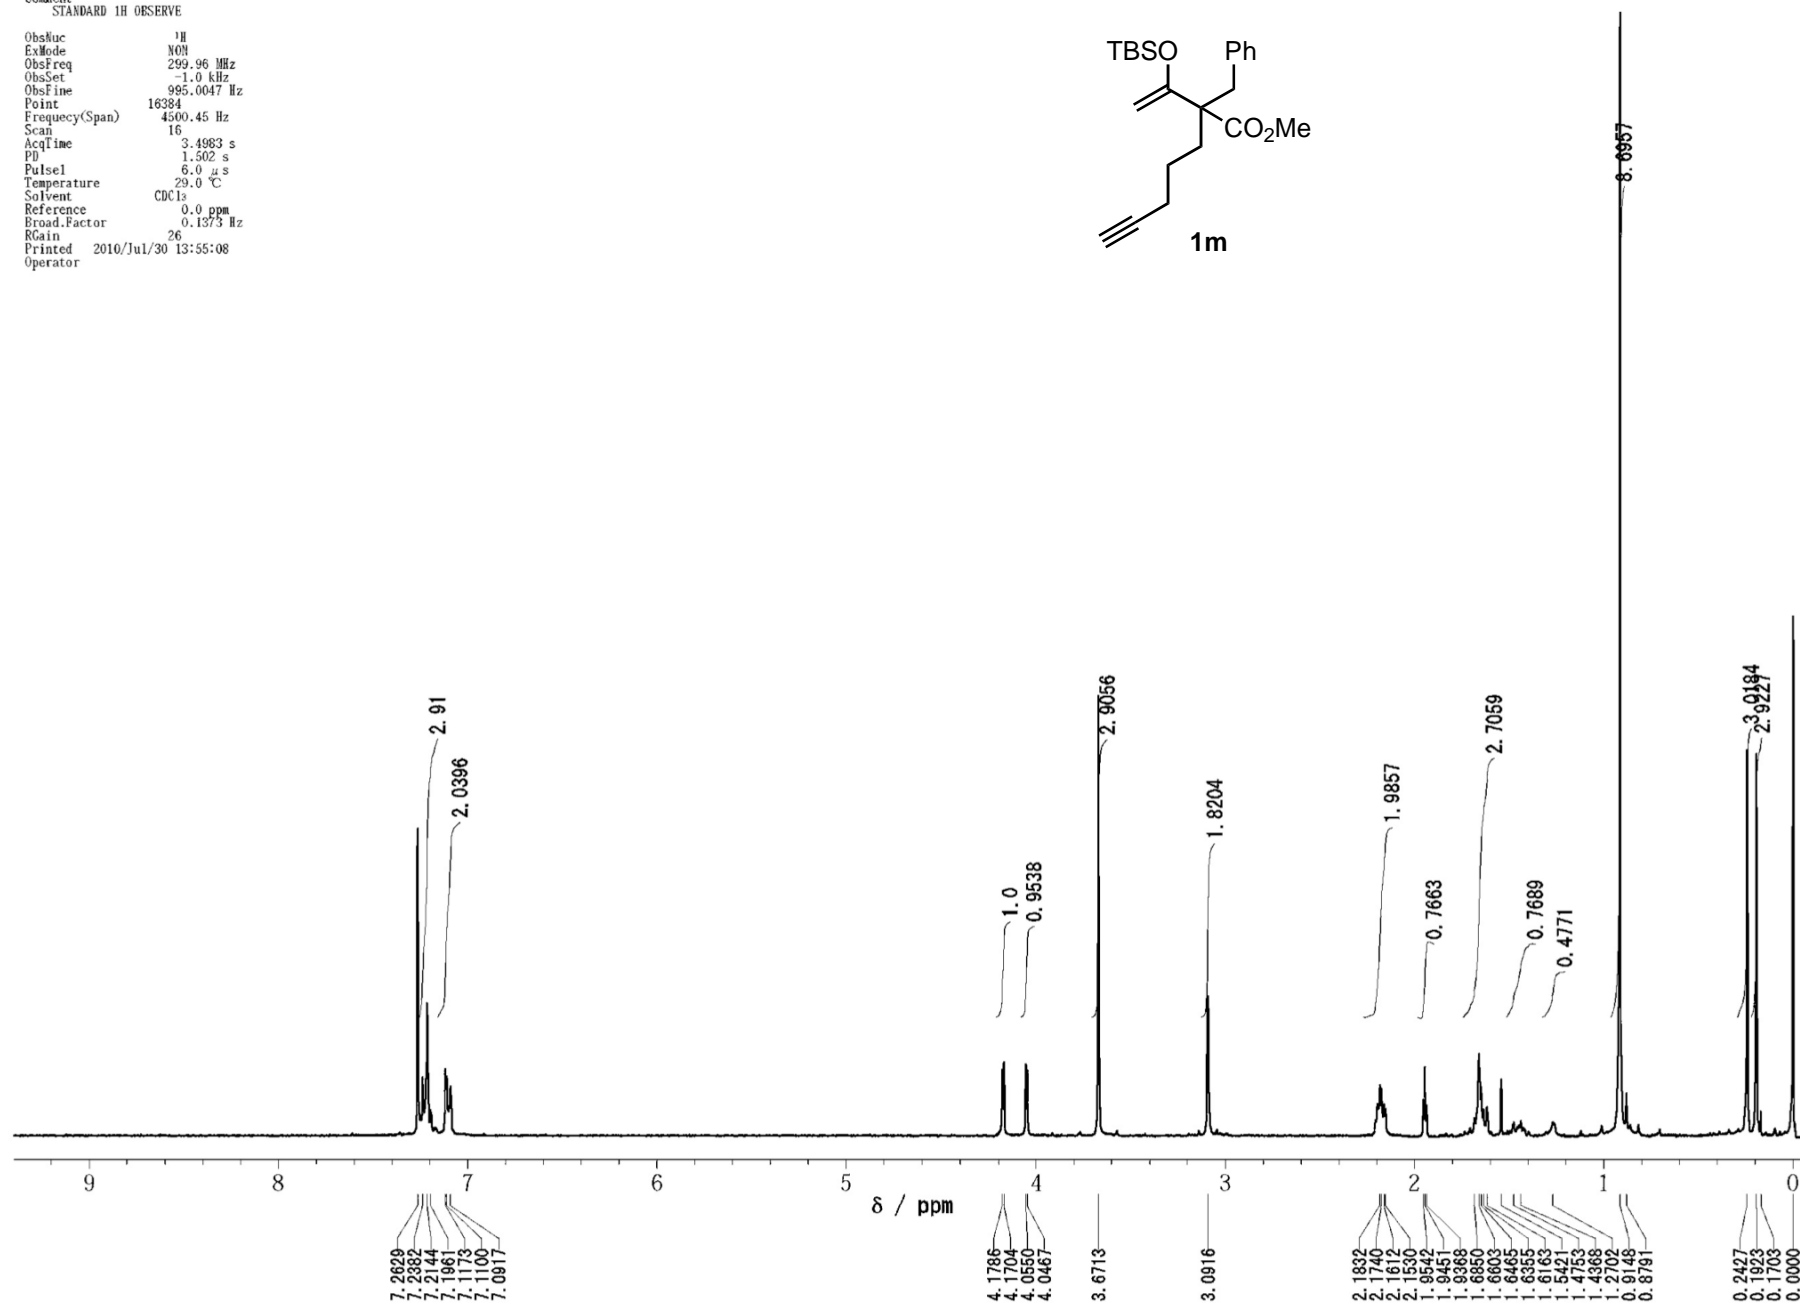

Original File:  
 Date Apr 9 10  
 Comment C13 Standard Observe  
 Stick=none Tune=6.4 Match=0.4

ObsRoc 13C  
 ExMode NOM  
 ObsFreq 75.43 MHz  
 ObsSet -1.0 kHz  
 ObsFine 996.3672 Hz  
 Point 32768  
 Frequency(Span) 18761.73 Hz  
 Scan 112  
 AcqTime 1.4992 s  
 PD 1.501 s  
 Pulse 6.0  $\mu$ s  
 Temperature 29.0  $^{\circ}$ C  
 Solvent CDCl<sub>3</sub>  
 Reference 77.0 ppm  
 Broad.Factor 0.2863 Hz  
 RGain 30  
 Printed 2010/Jul/30 13:56:13  
 Operator

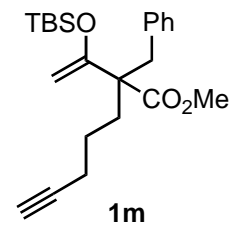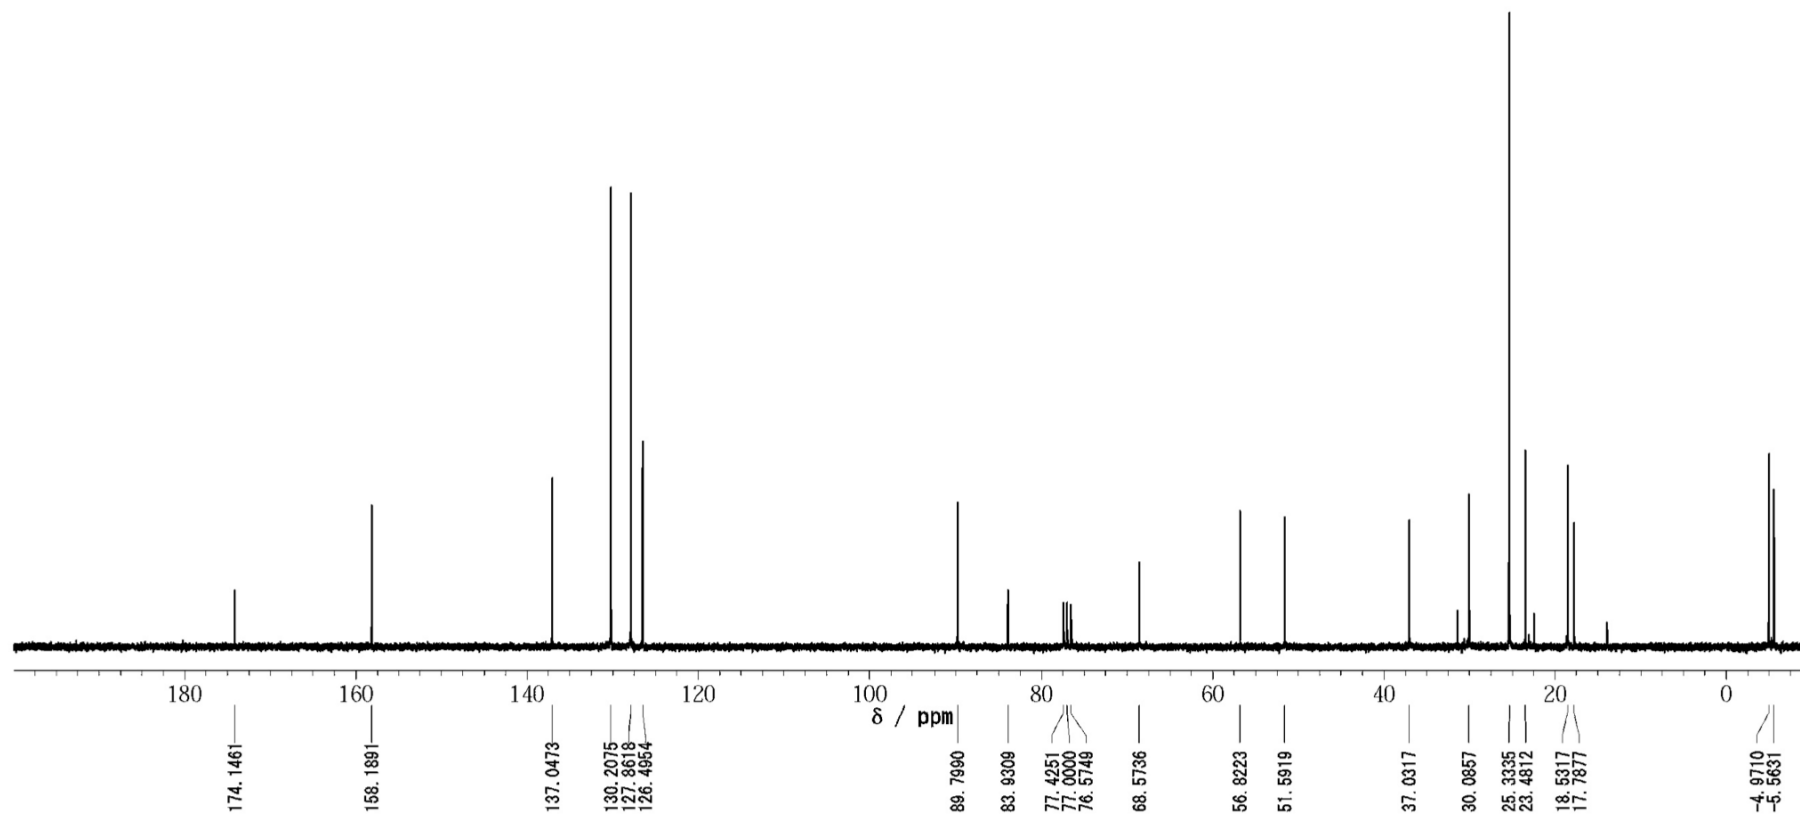

Original File: Jun 3 10  
 Date  
 Comment  
 STANDARD 1H OBSERVE  
 ObsRuoc 1H  
 ExMode NMR  
 ObsFreq 299.96 MHz  
 ObsSet -1.0 kHz  
 ObsFine 995.0047 Hz  
 Point 16384  
 Frequency(Span) 4500.45 Hz  
 Scan 32  
 AcqTime 3.4983 s  
 PD 1.502 s  
 Pulse1 6.0  $\mu$ s  
 Temperature 29.0  $^{\circ}$ C  
 Solvent CDCl<sub>3</sub>  
 Reference 0.0 ppm  
 Broad.Factor 0.1373 Hz  
 RGain 24  
 Printed 2010/Jul/30 14:00:43  
 Operator

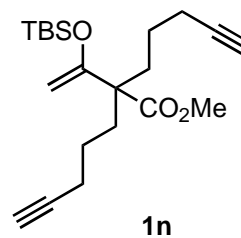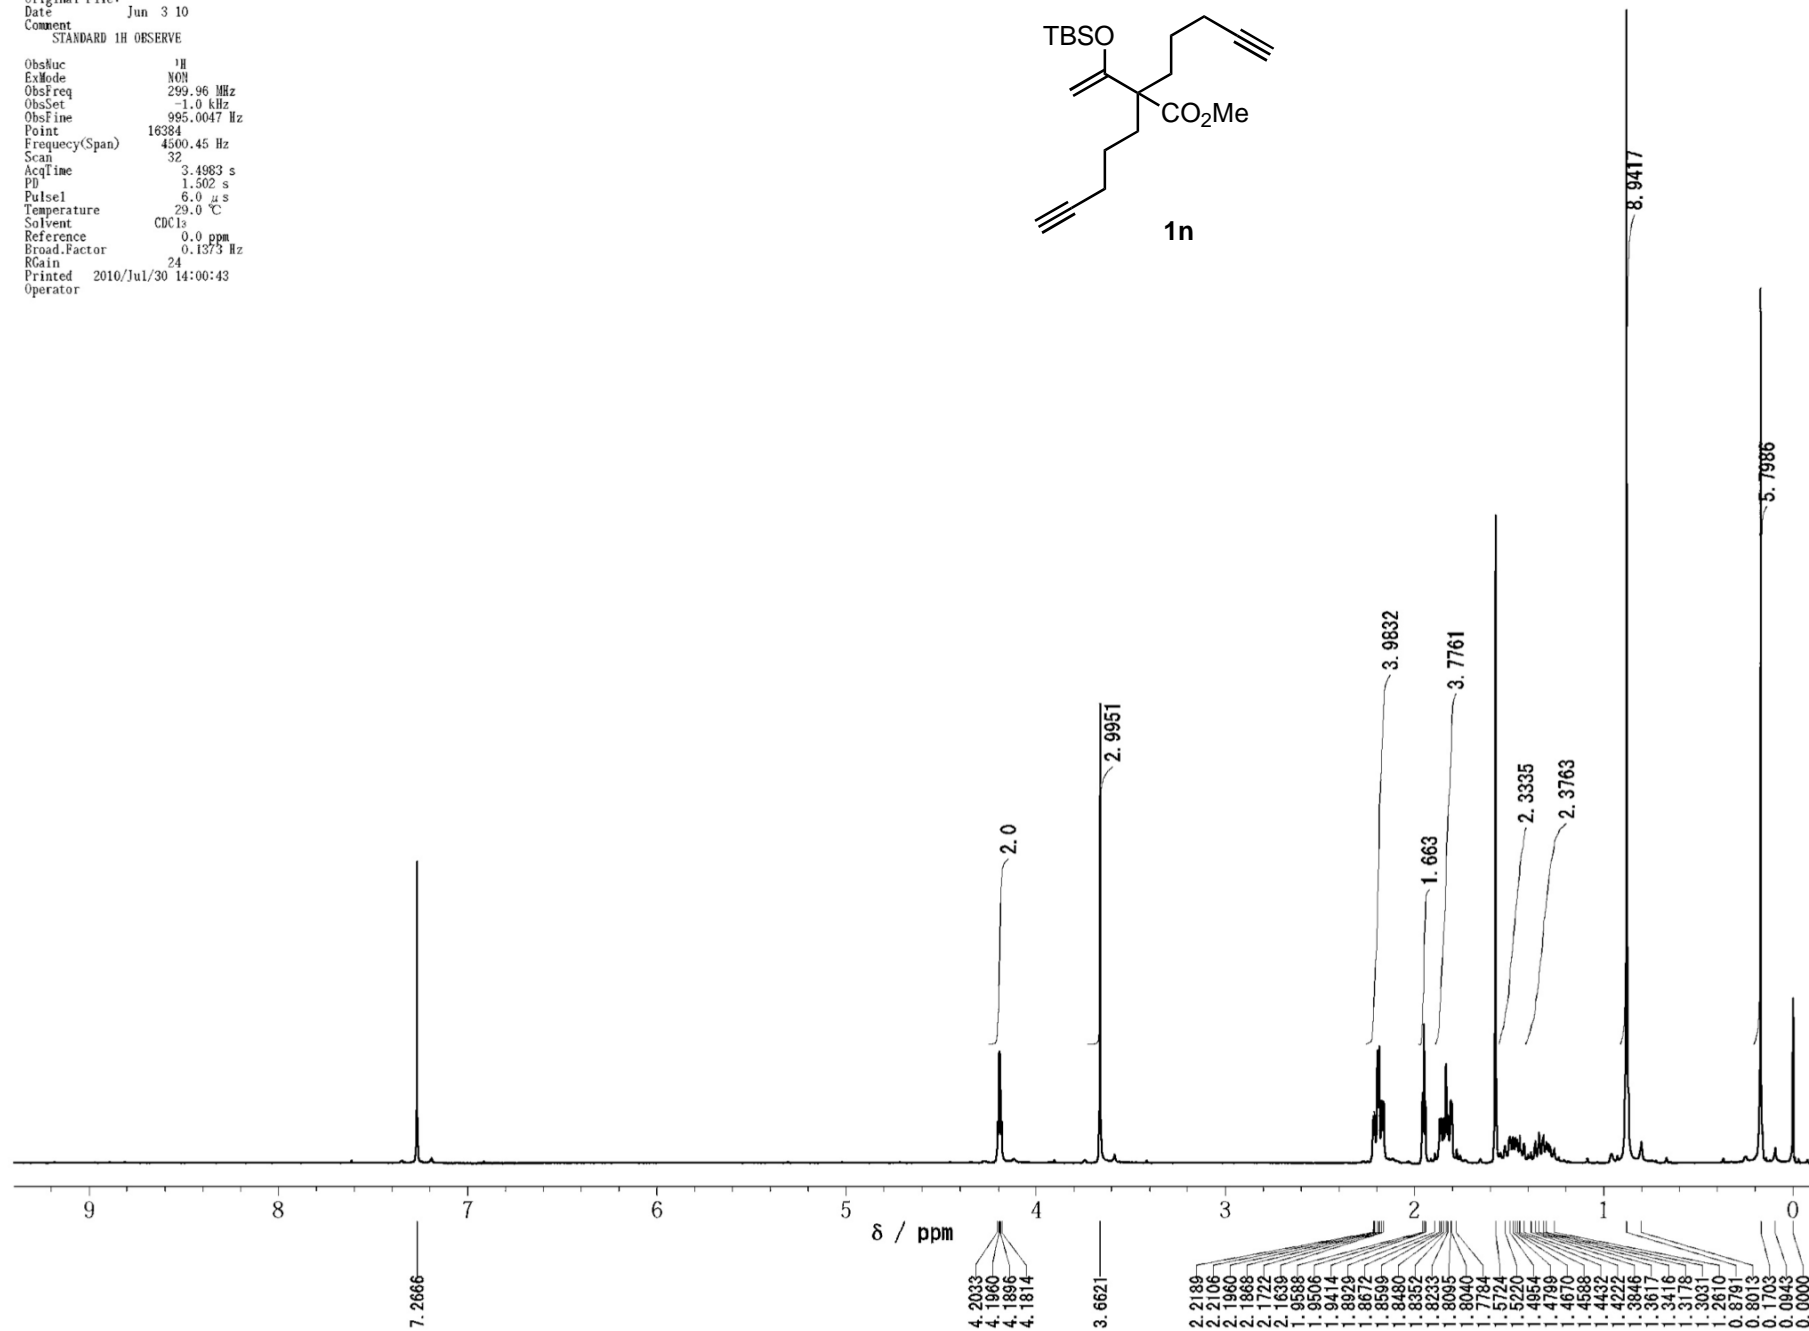

Original File: Jun 3 10  
 Date  
 Comment C13 Standard Observe  
 Stick=none Tune=6.4 Match=0.4

ObsRoc 13C  
 ExMode NOM  
 ObsFreq 75.43 MHz  
 ObsSet -1.0 kHz  
 ObsFine 996.3672 Hz  
 Point 32768  
 Frequency(Span) 18761.73 Hz  
 Scan 192  
 AcqTime 1.4992 s  
 PD 1.501 s  
 Pulse 6.0  $\mu$ s  
 Temperature 29.0  $^{\circ}$ C  
 Solvent CDCl<sub>3</sub>  
 Reference 77.0 ppm  
 Broad.Factor 0.2863 Hz  
 RGain 30  
 Printed 2010/Jul/30 14:03:51  
 Operator

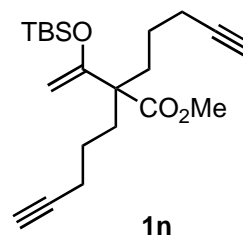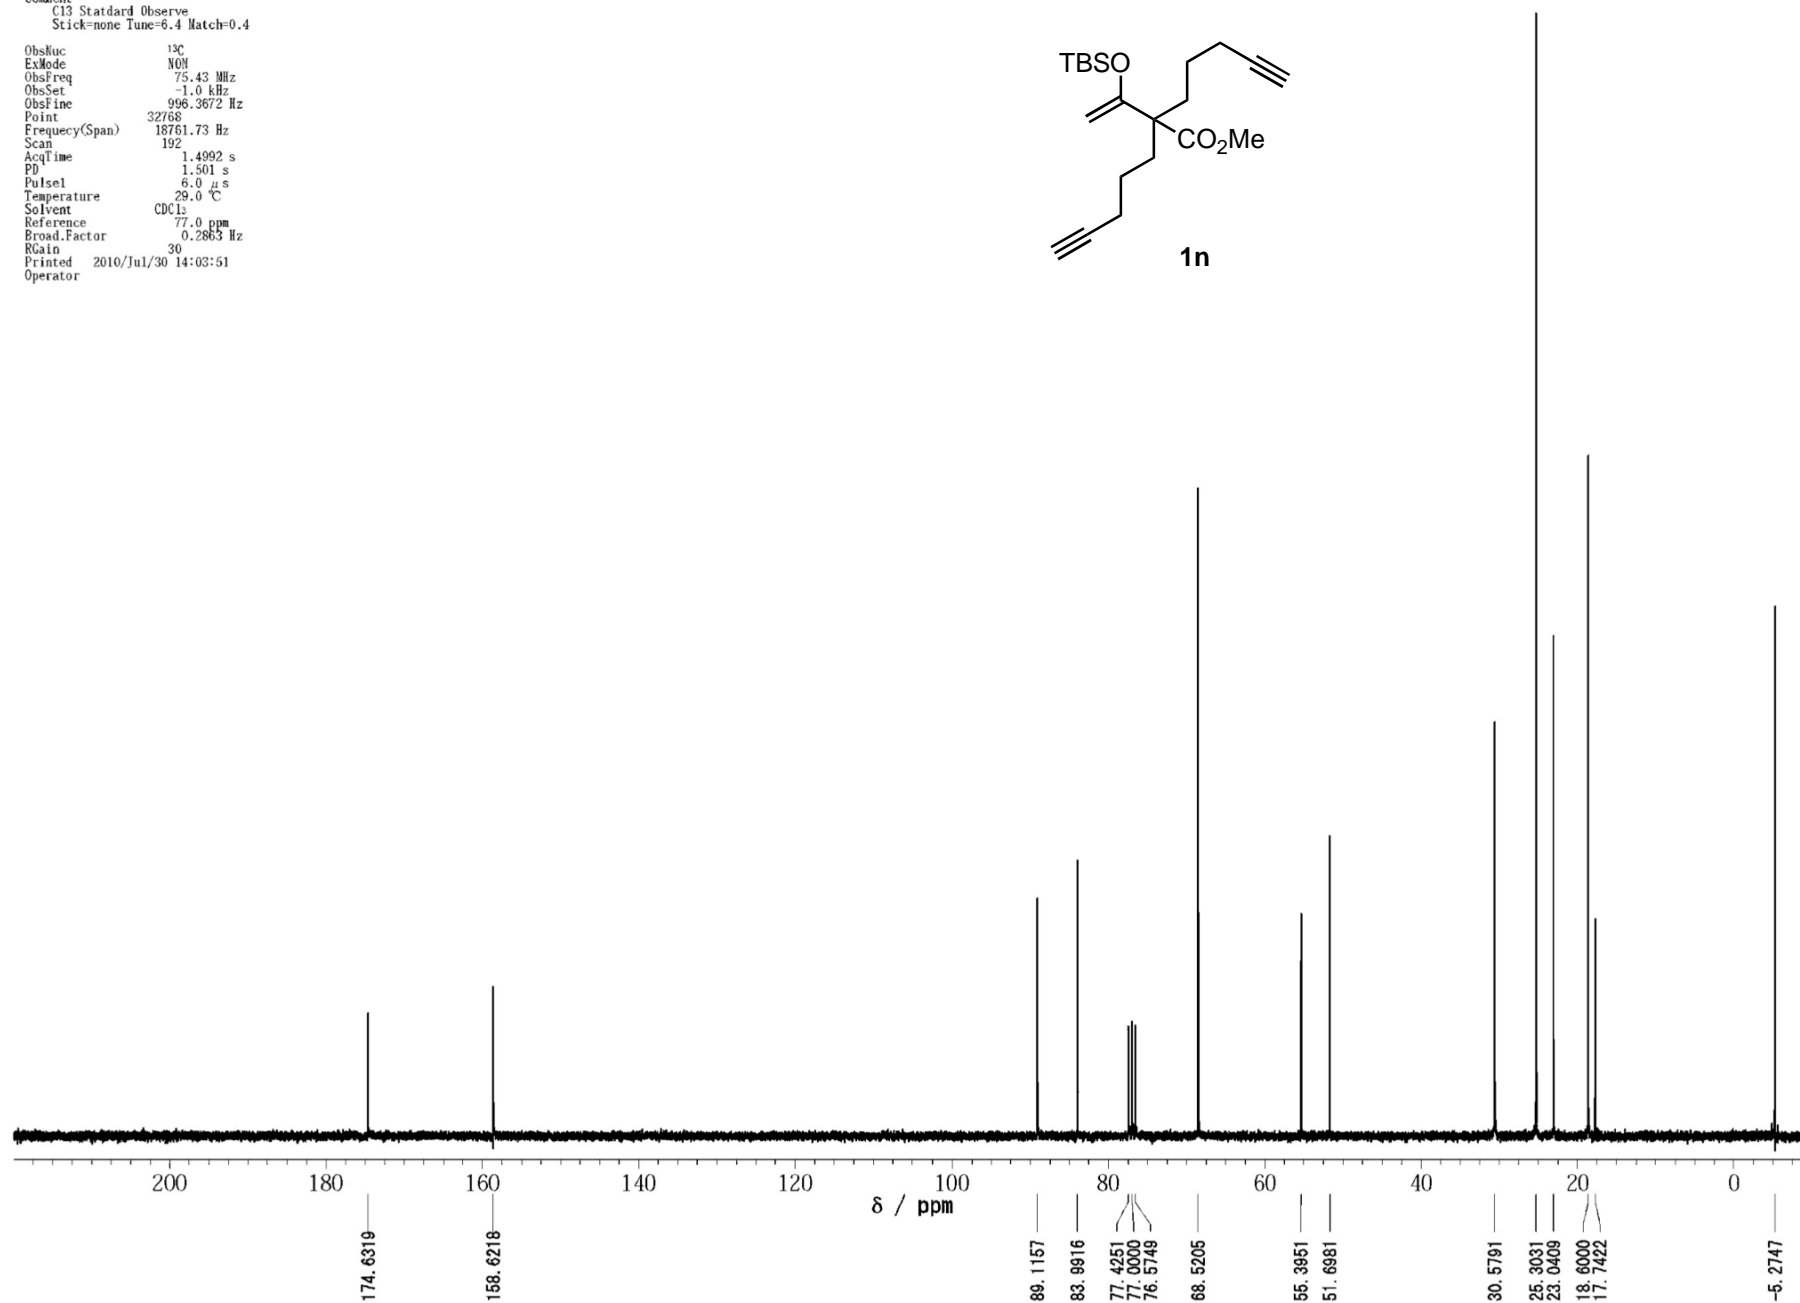

File C:\DOCUMENTS AND SETTINGS\北海道大学\MY DOCUMENTS\DELL NMR データ 06Q19\HIDETO\HID-10-124B-FR1-1H.FID\FID.ALS  
 Original File:  
 Date Jun 21 10  
 Comment  
 STANDARD 1H OBSERVE

ObsNuc 1H  
 ExMode NON  
 ObsFreq 299.96 MHz  
 ObsSet -1.0 kHz  
 ObsFine 995.0047 Hz  
 Point 16384  
 Frequency(Span) 4500.45 Hz  
 Scan 32  
 AcqTime 3.4983 s  
 PD 1.502 s  
 Pulse1 6.0  $\mu$ s  
 Temperature 29.0  $^{\circ}$ C  
 Solvent CDCl<sub>3</sub>  
 Reference 0.0 ppm  
 Broad.Factor 0.1373 Hz  
 RGain 29  
 Printed 2010/Jul/29 21:07:42  
 Operator

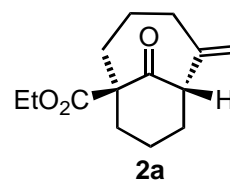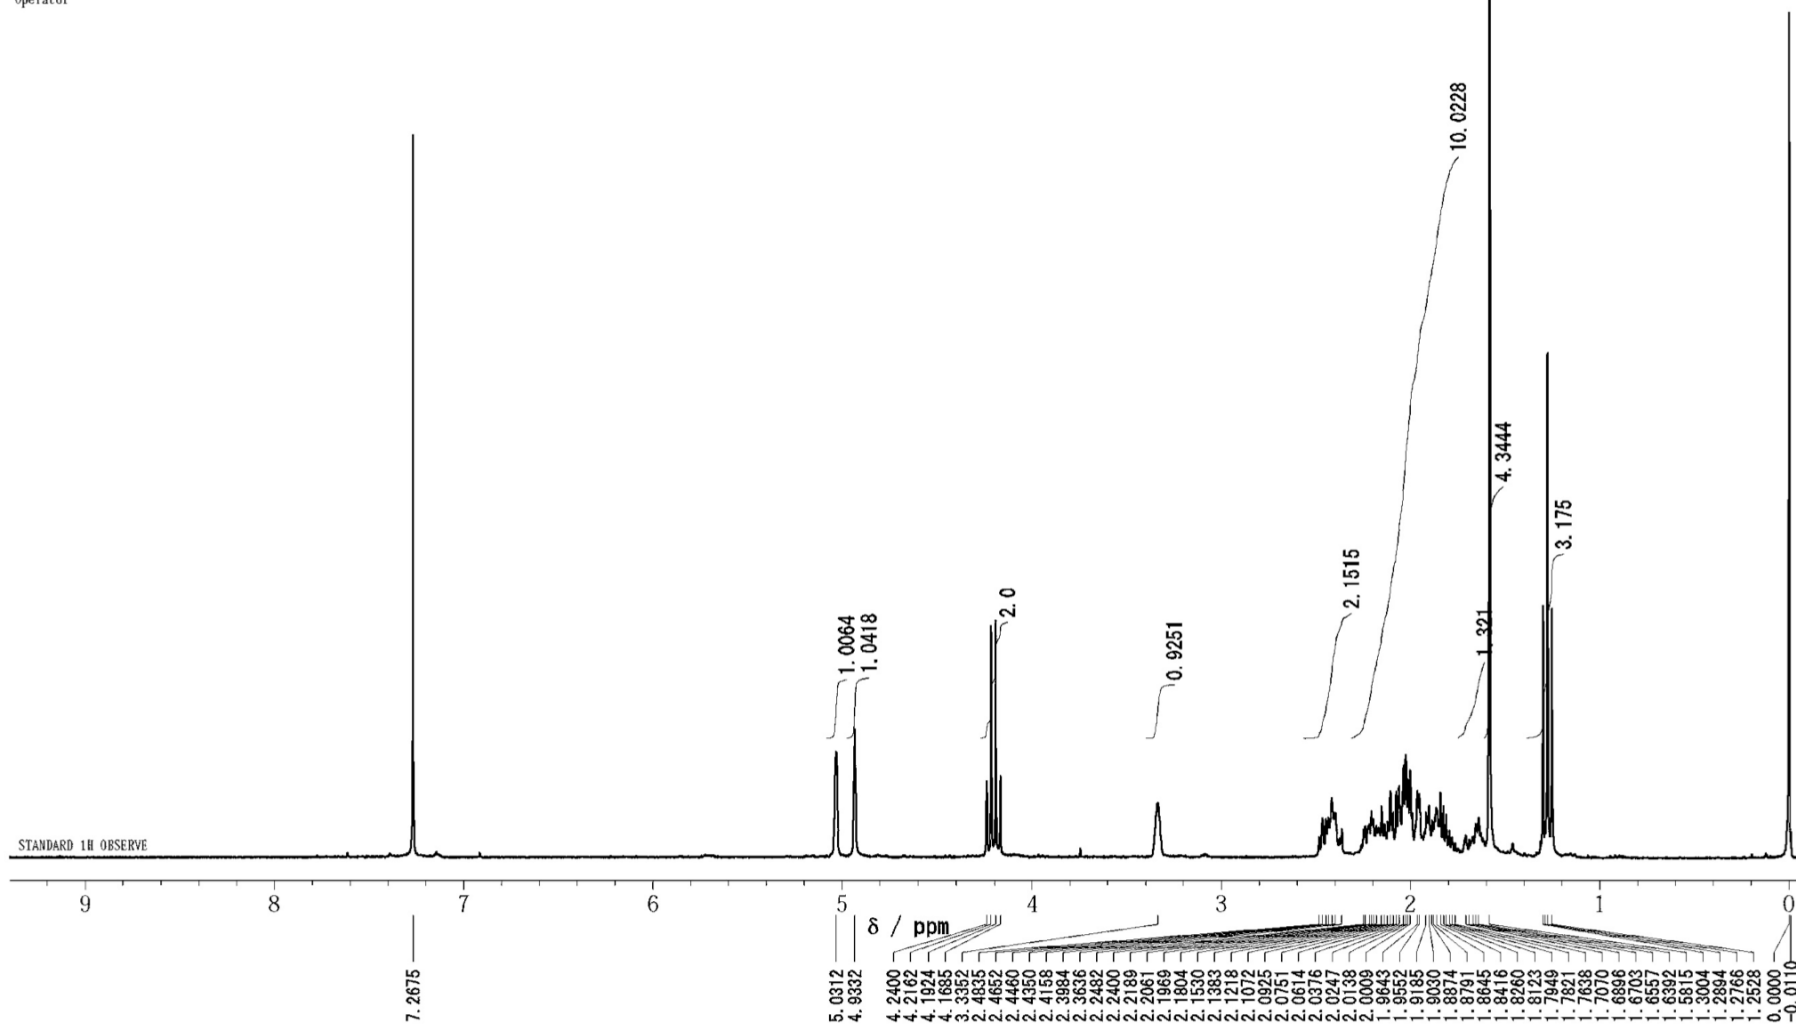

File C:\DOCUMENTS AND SETTINGS\北海道大学\MY DOCUMENTS\DELL NMR データ 06Q1Y\HIDETO\RID-10-124C-FR1-13C.FID\FID.ALS

Original File:

Date Jun 21 10

Comment

C13 Standard Observe

Stick:none Tune=6.4 Match=0.4

ObsNuc 13C  
ExMode NON  
ObsFreq 75.43 MHz  
ObsSet -1.0 kHz  
ObsFine 996.3672 Hz  
Point 32768  
Frequency(Span) 18761.73 Hz  
Scan 160  
AcqTime 1.4892 s  
PD 1.501 s  
Pulse1 6.0  $\mu$ s  
Temperature 29.0  $^{\circ}$ C  
Solvent CDCl<sub>3</sub>  
Reference 77.0 ppm  
Broad.Factor 0.2865 Hz  
RGain 30  
Printed 2010/Jul/29 21:09:21  
Operator

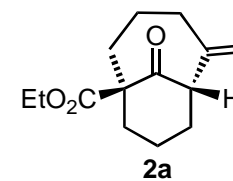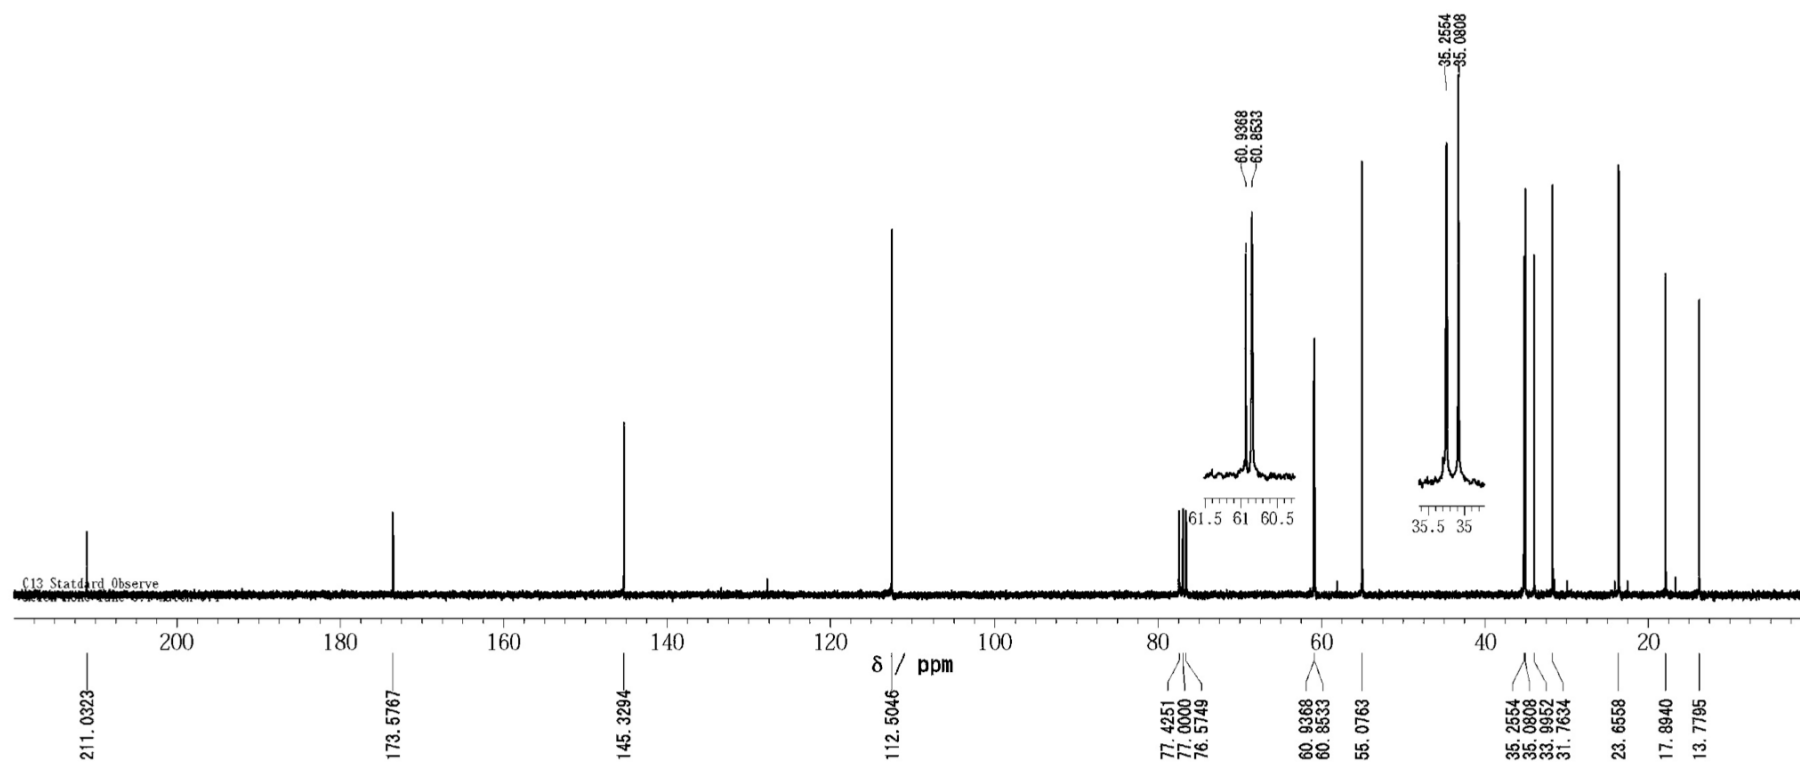

Original File: Jul 2 10  
 Date: Jul 2 10  
 Comment: STANDARD 1H OBSERVE  
 ObsRuoc: 1H  
 ExMode: NMR  
 ObsFreq: 299.96 MHz  
 ObsSet: -1.0 kHz  
 ObsFine: 995.0047 Hz  
 Point: 16384  
 Frequency(Span): 4500.45 Hz  
 Scan: 32  
 AcqTime: 3.4983 s  
 PD: 1.502 s  
 Pulse1: 6.0  $\mu$ s  
 Temperature: 29.0  $^{\circ}$ C  
 Solvent: CDCl<sub>3</sub>  
 Reference: 0.0 ppm  
 Broad.Factor: 0.1373 Hz  
 RGain: 30  
 Printed: 2010/Jul/29 21:18:44  
 Operator:

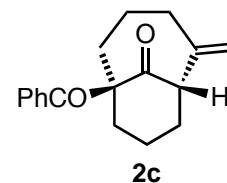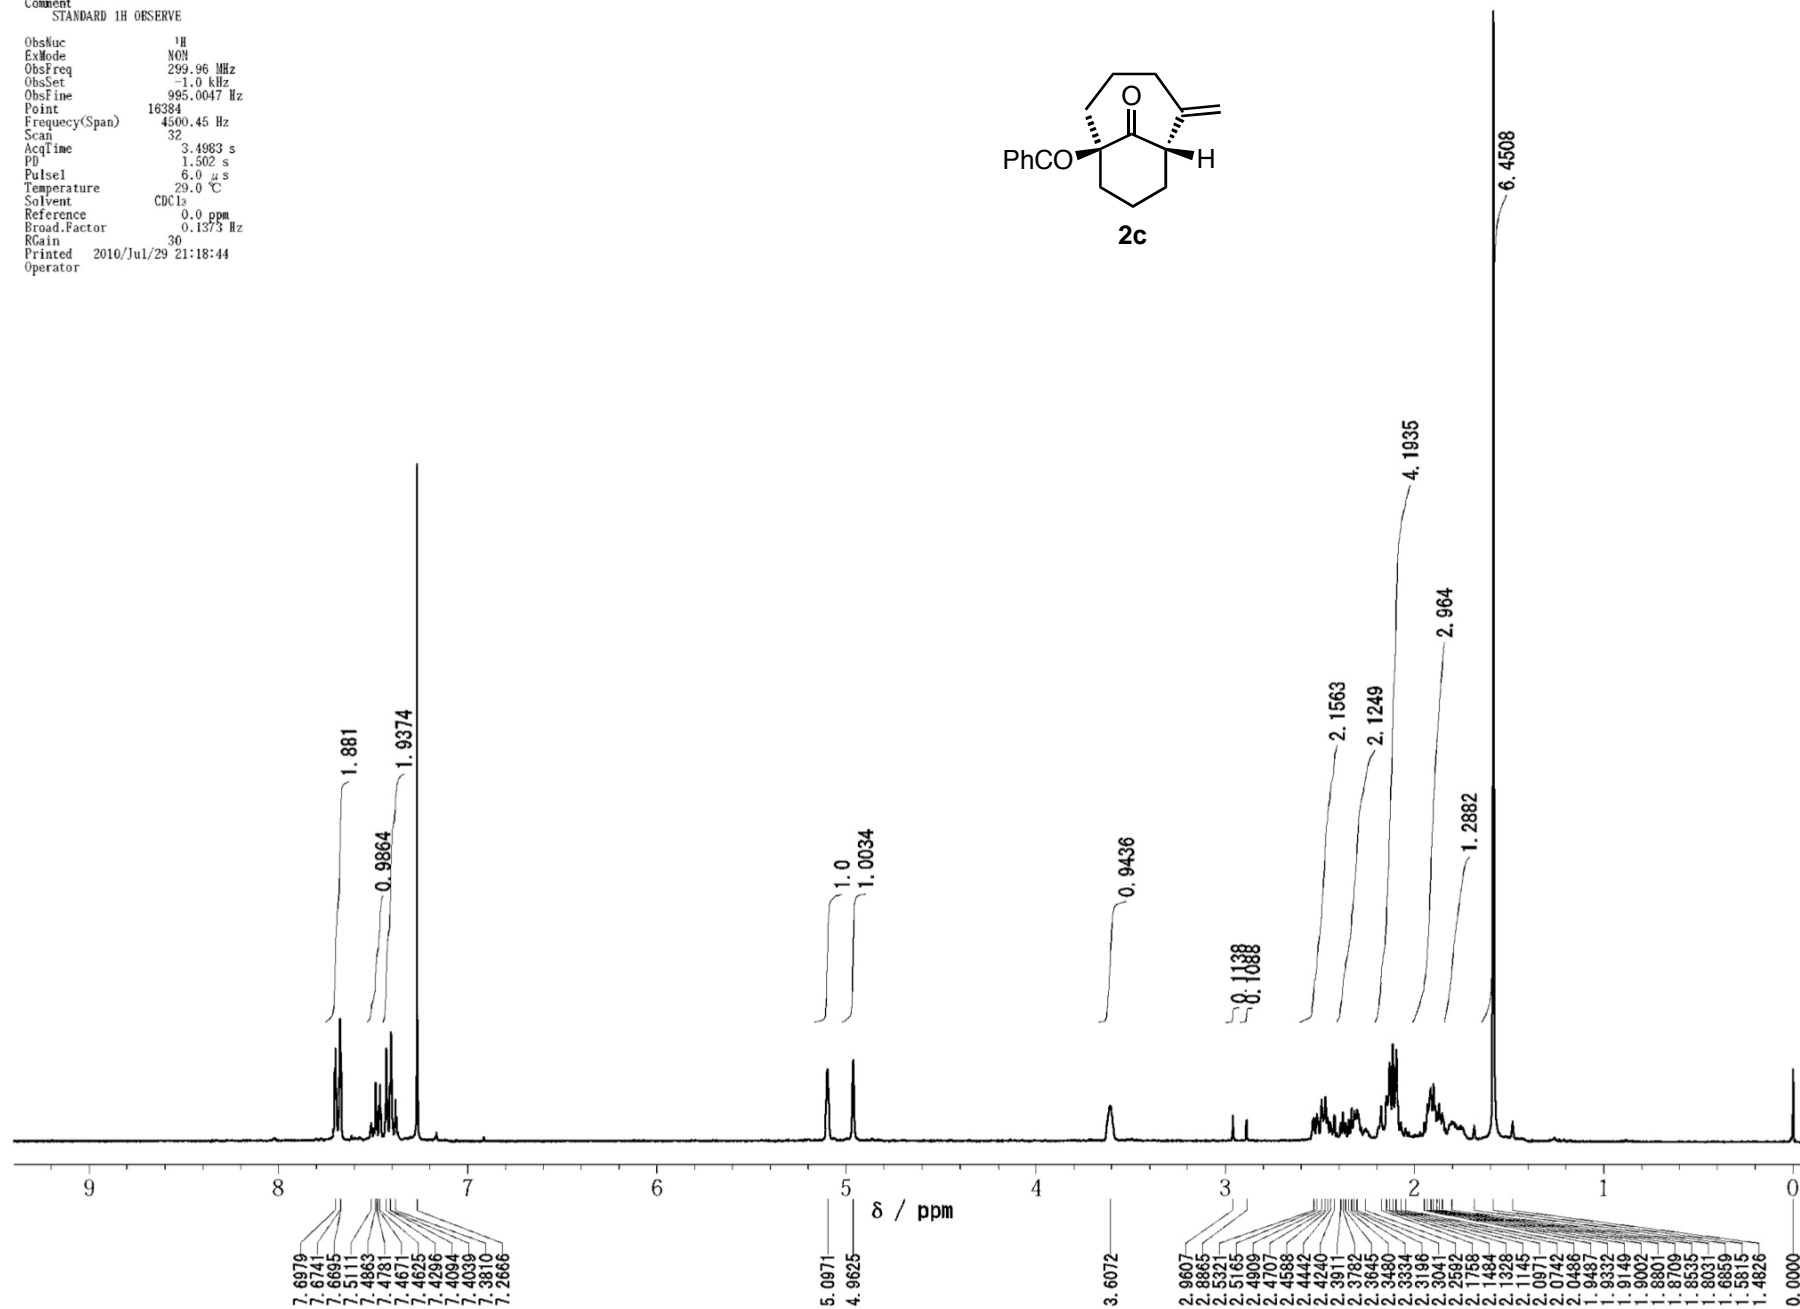



Original File:  
 Date Jul 2 10  
 Comment  
 C13 Standard Observe  
 Stick=none Tune=6.4 Match=0.4

ObsRoc 13C  
 ExMode NOM  
 ObsFreq 75.43 MHz  
 ObsSet -1.0 kHz  
 ObsFine 996.3672 Hz  
 Point 32768  
 Frequency(Span) 18761.73 Hz  
 Scan 1024  
 AcqTime 1.4992 s  
 PD 1.501 s  
 Pulse1 6.0  $\mu$ s  
 Temperature 29.0  $^{\circ}$ C  
 Solvent CDCl<sub>3</sub>  
 Reference 77.0 ppm  
 Broad.Factor 0.2863 Hz  
 RGain 30  
 Printed 2010/Jul/29 21:20:10  
 Operator

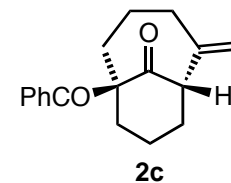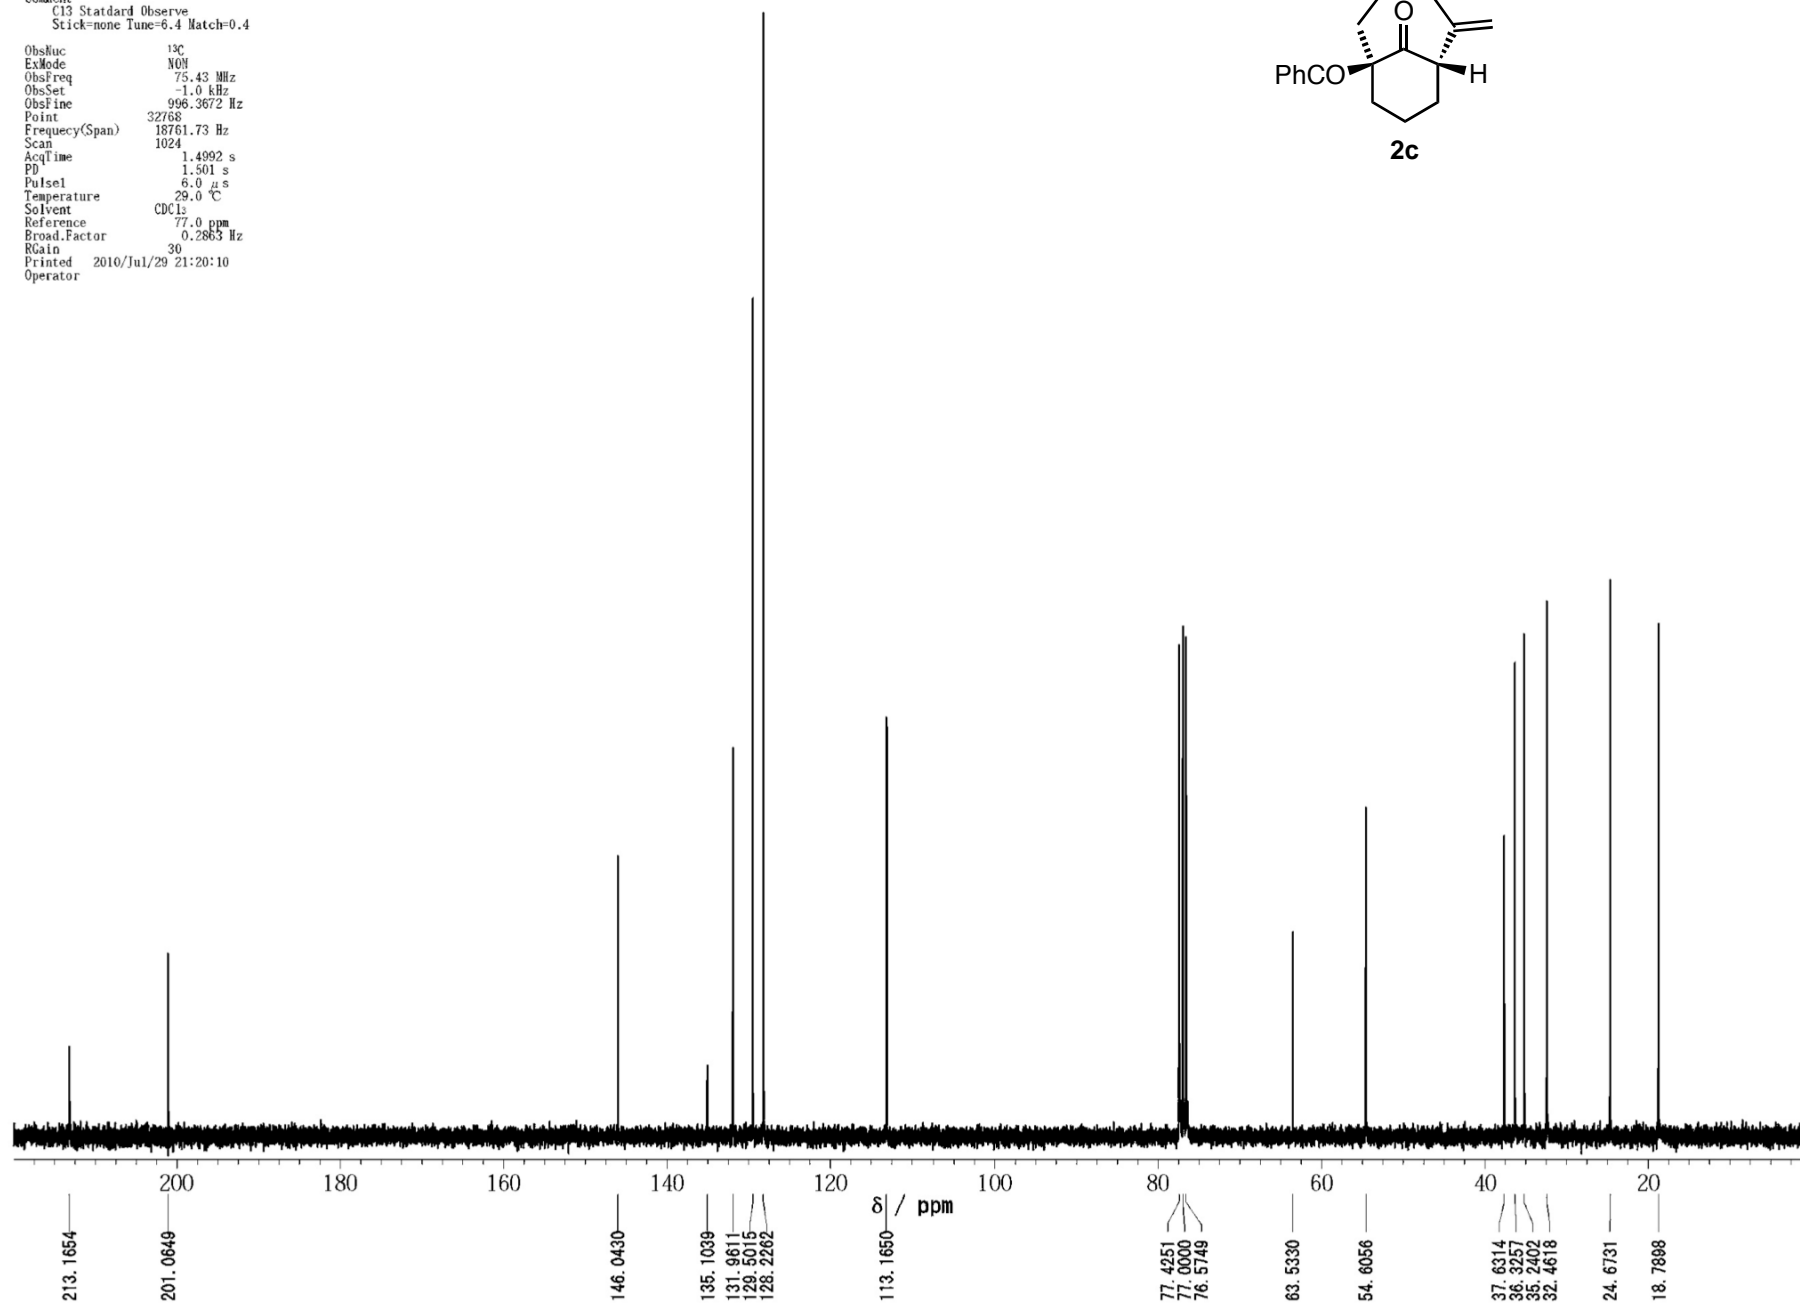

Original File: Jun 23 10  
 Date  
 Comment  
 STANDARD 1H OBSERVE

ObsRuoc <sup>1</sup>H  
 ExMode 108  
 ObsFreq 299.96 MHz  
 ObsSet -1.0 kHz  
 ObsFine 995.0047 Hz  
 Point 16384  
 Frequency(Span) 4500.45 Hz  
 Scan 32  
 AcqTime 3.4983 s  
 PD 1.502 s  
 Pulse1 6.0  $\mu$ s  
 Temperature 29.0  $^{\circ}$ C  
 Solvent CDCl<sub>3</sub>  
 Reference 0.0 ppm  
 Broad.Factor 0.1373 Hz  
 RGain 14  
 Printed 2010/Jul/29 21:32:04  
 Operator

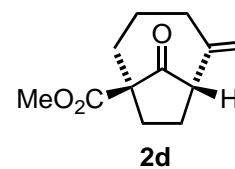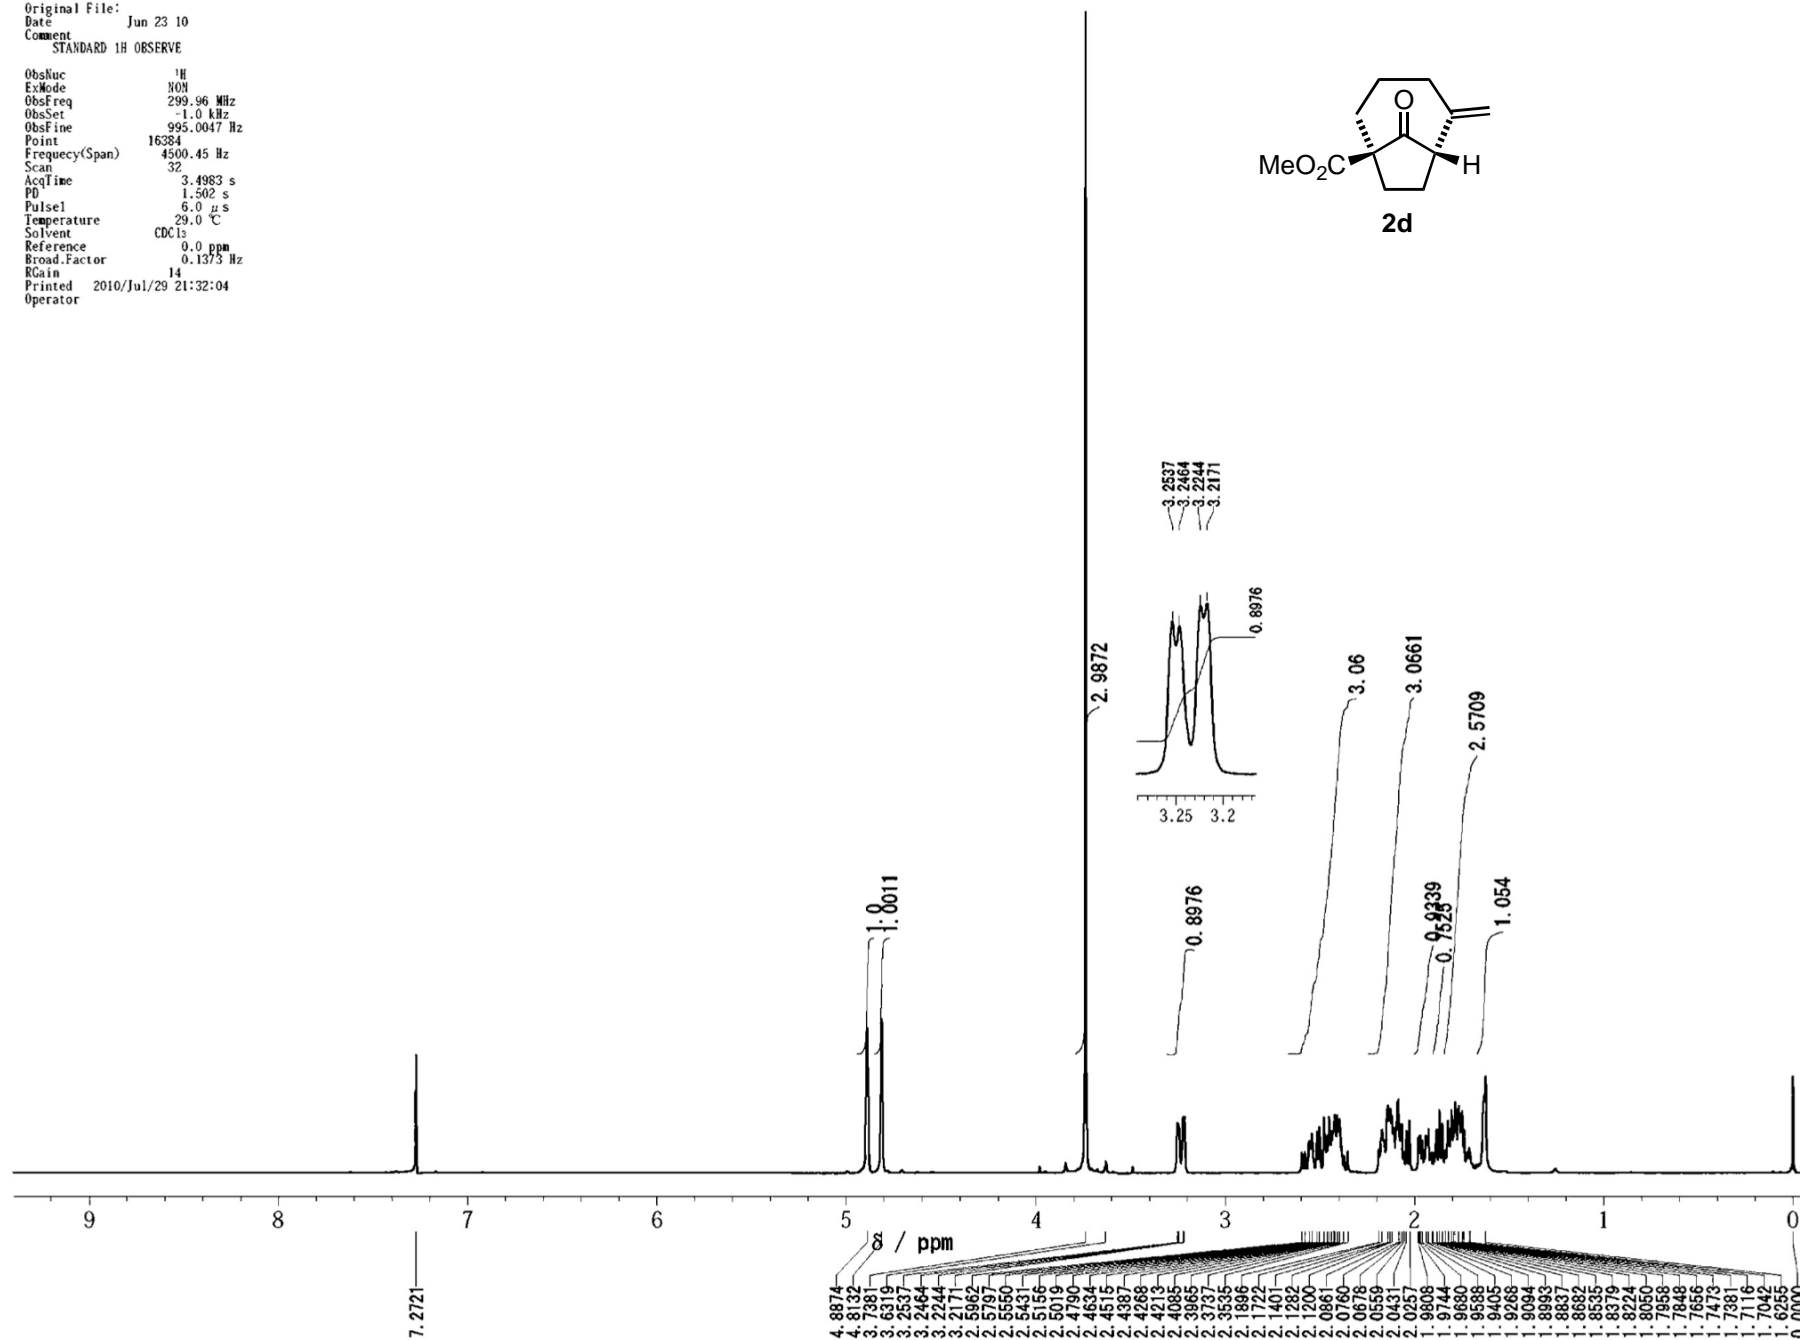

Original File:  
 Date Jun 23 10  
 Comment  
 C13 Standard Observe  
 Stick=none Tune=6.4 Match=0.4

ObsRoc 13C  
 ExMode NOM  
 ObsFreq 75.43 MHz  
 ObsSet -1.0 kHz  
 ObsFine 996.3672 Hz  
 Point 32768  
 Frequency(Span) 18761.73 Hz  
 Scan 11904  
 AcqTime 1.4992 s  
 PD 1.501 s  
 Pulse1 6.0  $\mu$ s  
 Temperature 29.0  $^{\circ}$ C  
 Solvent CDCl<sub>3</sub>  
 Reference 77.0 ppm  
 Broad.Factor 0.2863 Hz  
 RGain 30  
 Printed 2010/Jul/29 21:33:29  
 Operator

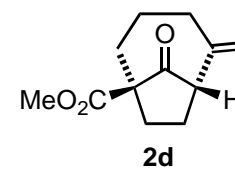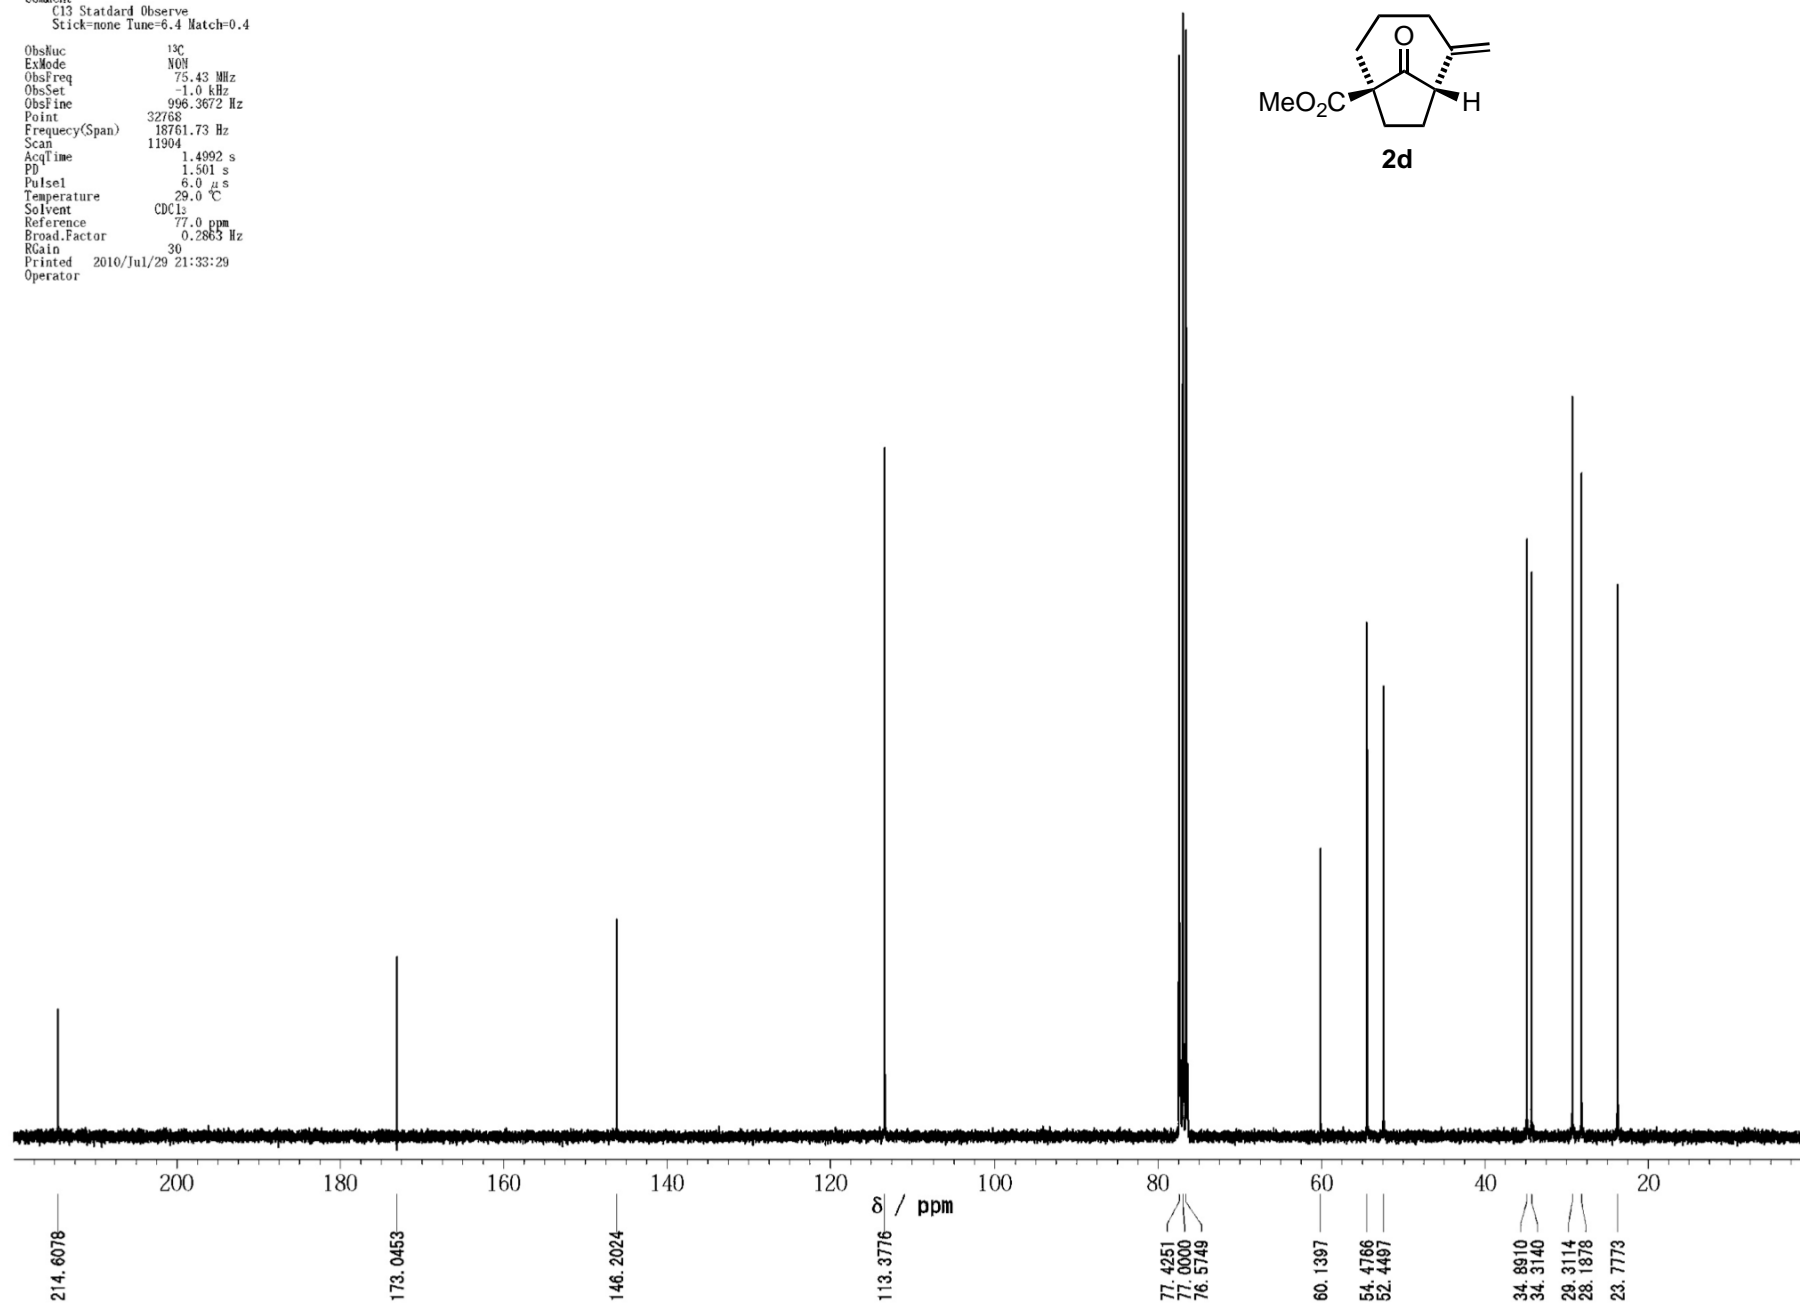

Original File:  
 Date Jun 21 10  
 Comment  
 STANDARD 1H OBSERVE  
 ObsRuoc <sup>1</sup>H  
 ExMode NMR  
 ObsFreq 299.96 MHz  
 ObsSet -1.0 kHz  
 ObsFine 995.0047 Hz  
 Point 16384  
 Frequency(Span) 4500.45 Hz  
 Scan 32  
 AcqTime 3.4983 s  
 PD 1.502 s  
 Pulse1 6.0  $\mu$ s  
 Temperature 29.0  $^{\circ}$ C  
 Solvent CDCl<sub>3</sub>  
 Reference 0.0 ppm  
 Broad.Factor 0.1373 Hz  
 RGain 24  
 Printed 2010/Jul/29 21:40:34  
 Operator

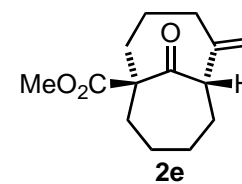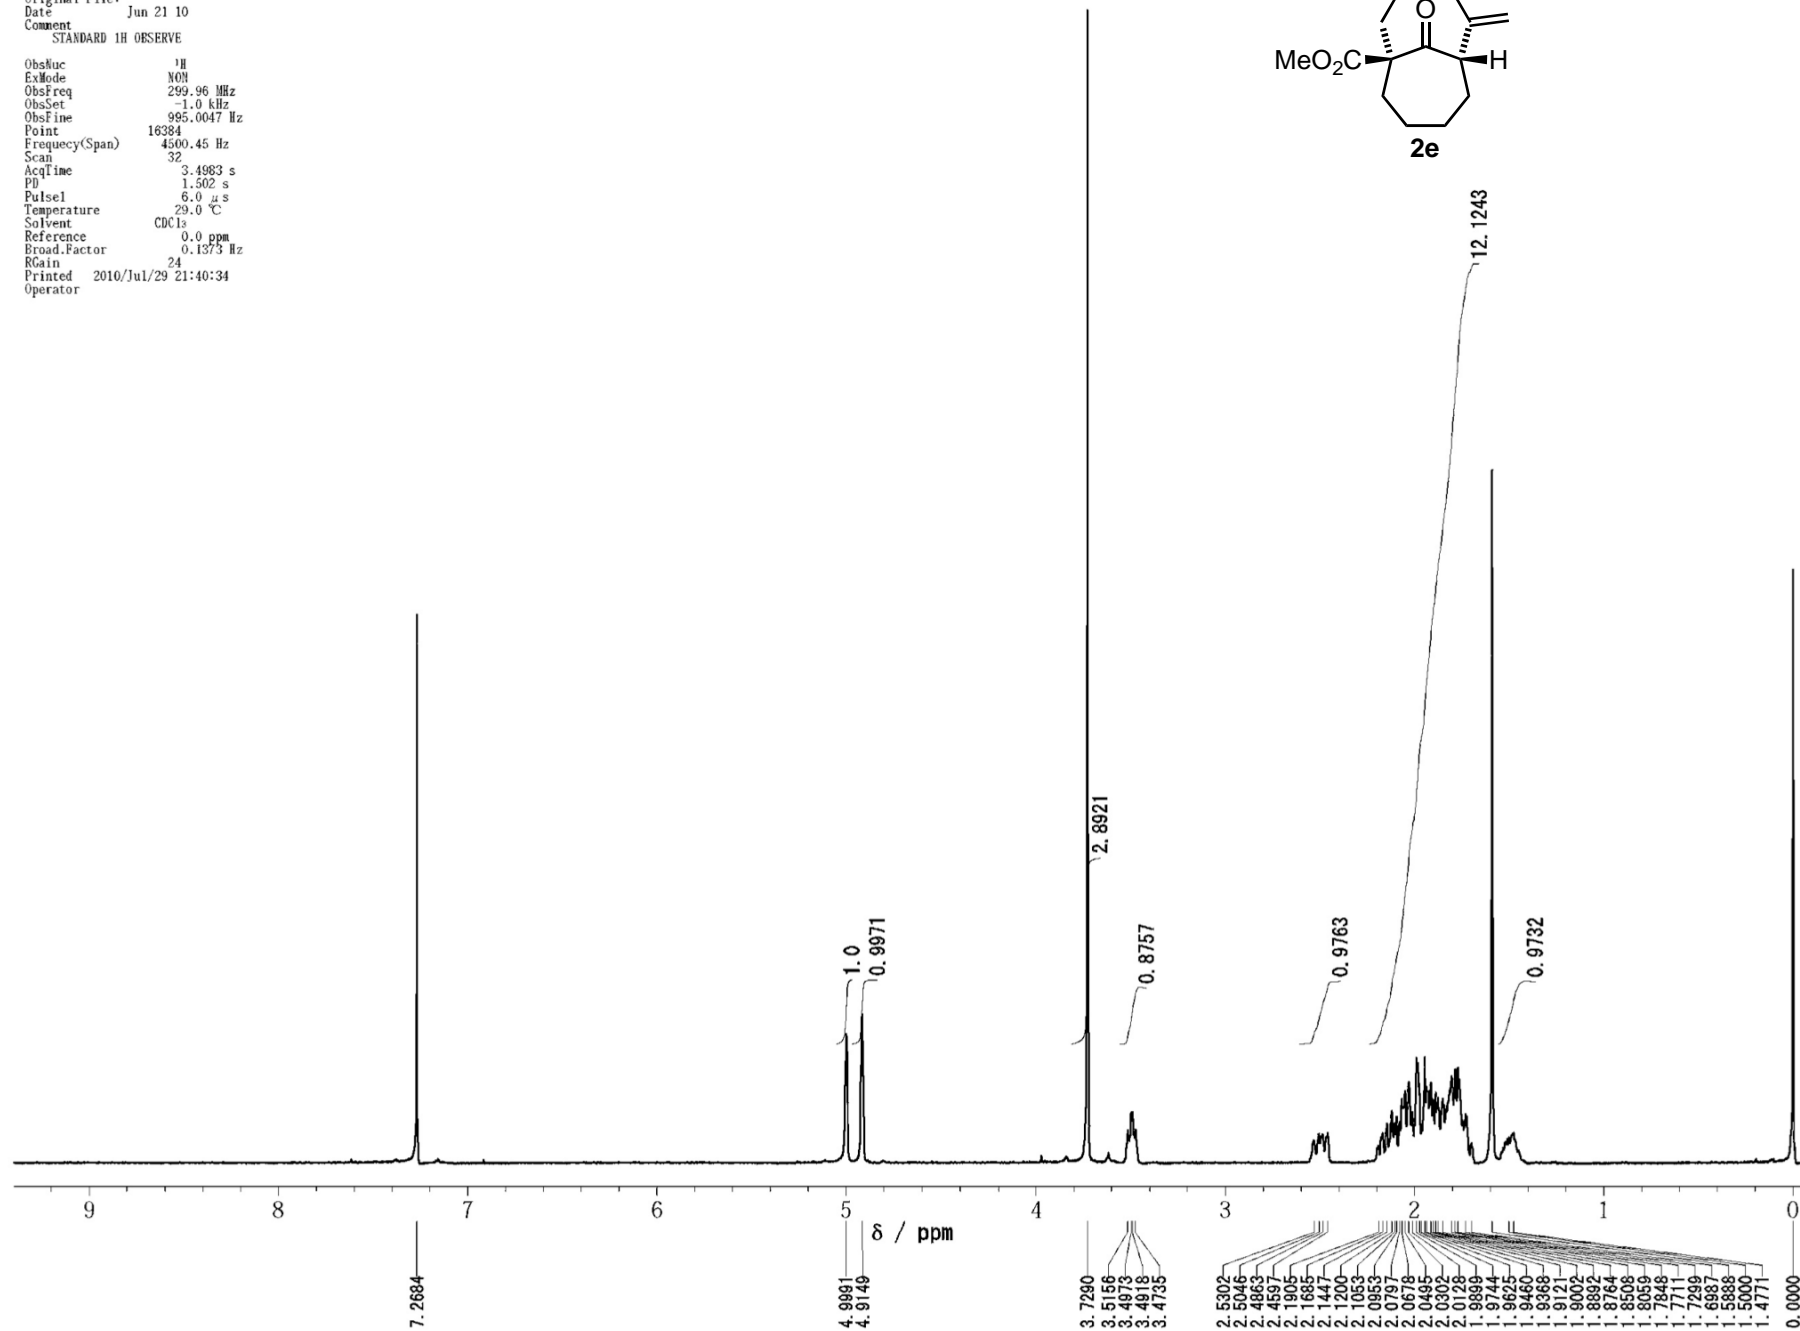

Original File:  
 Date Jun 21 10  
 Comment  
 C13 Standard Observe  
 Stick=none Tune=6.4 Match=0.4

ObsRuc 13C  
 ExMode NOM  
 ObsFreq 75.43 MHz  
 ObsSet -1.0 kHz  
 ObsFine 996.3672 Hz  
 Point 32768  
 Frequency(Span) 18761.73 Hz  
 Scan 11456  
 AcqTime 1.4992 s  
 PD 1.501 s  
 Pulse1 6.0  $\mu$ s  
 Temperature 29.0  $^{\circ}$ C  
 Solvent CDCl<sub>3</sub>  
 Reference 0.0 ppm  
 Broad.Factor 0.2863 Hz  
 RGain 30  
 Printed 2010/Jul/29 21:41:47  
 Operator

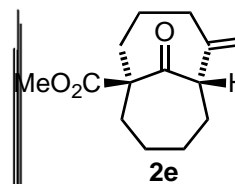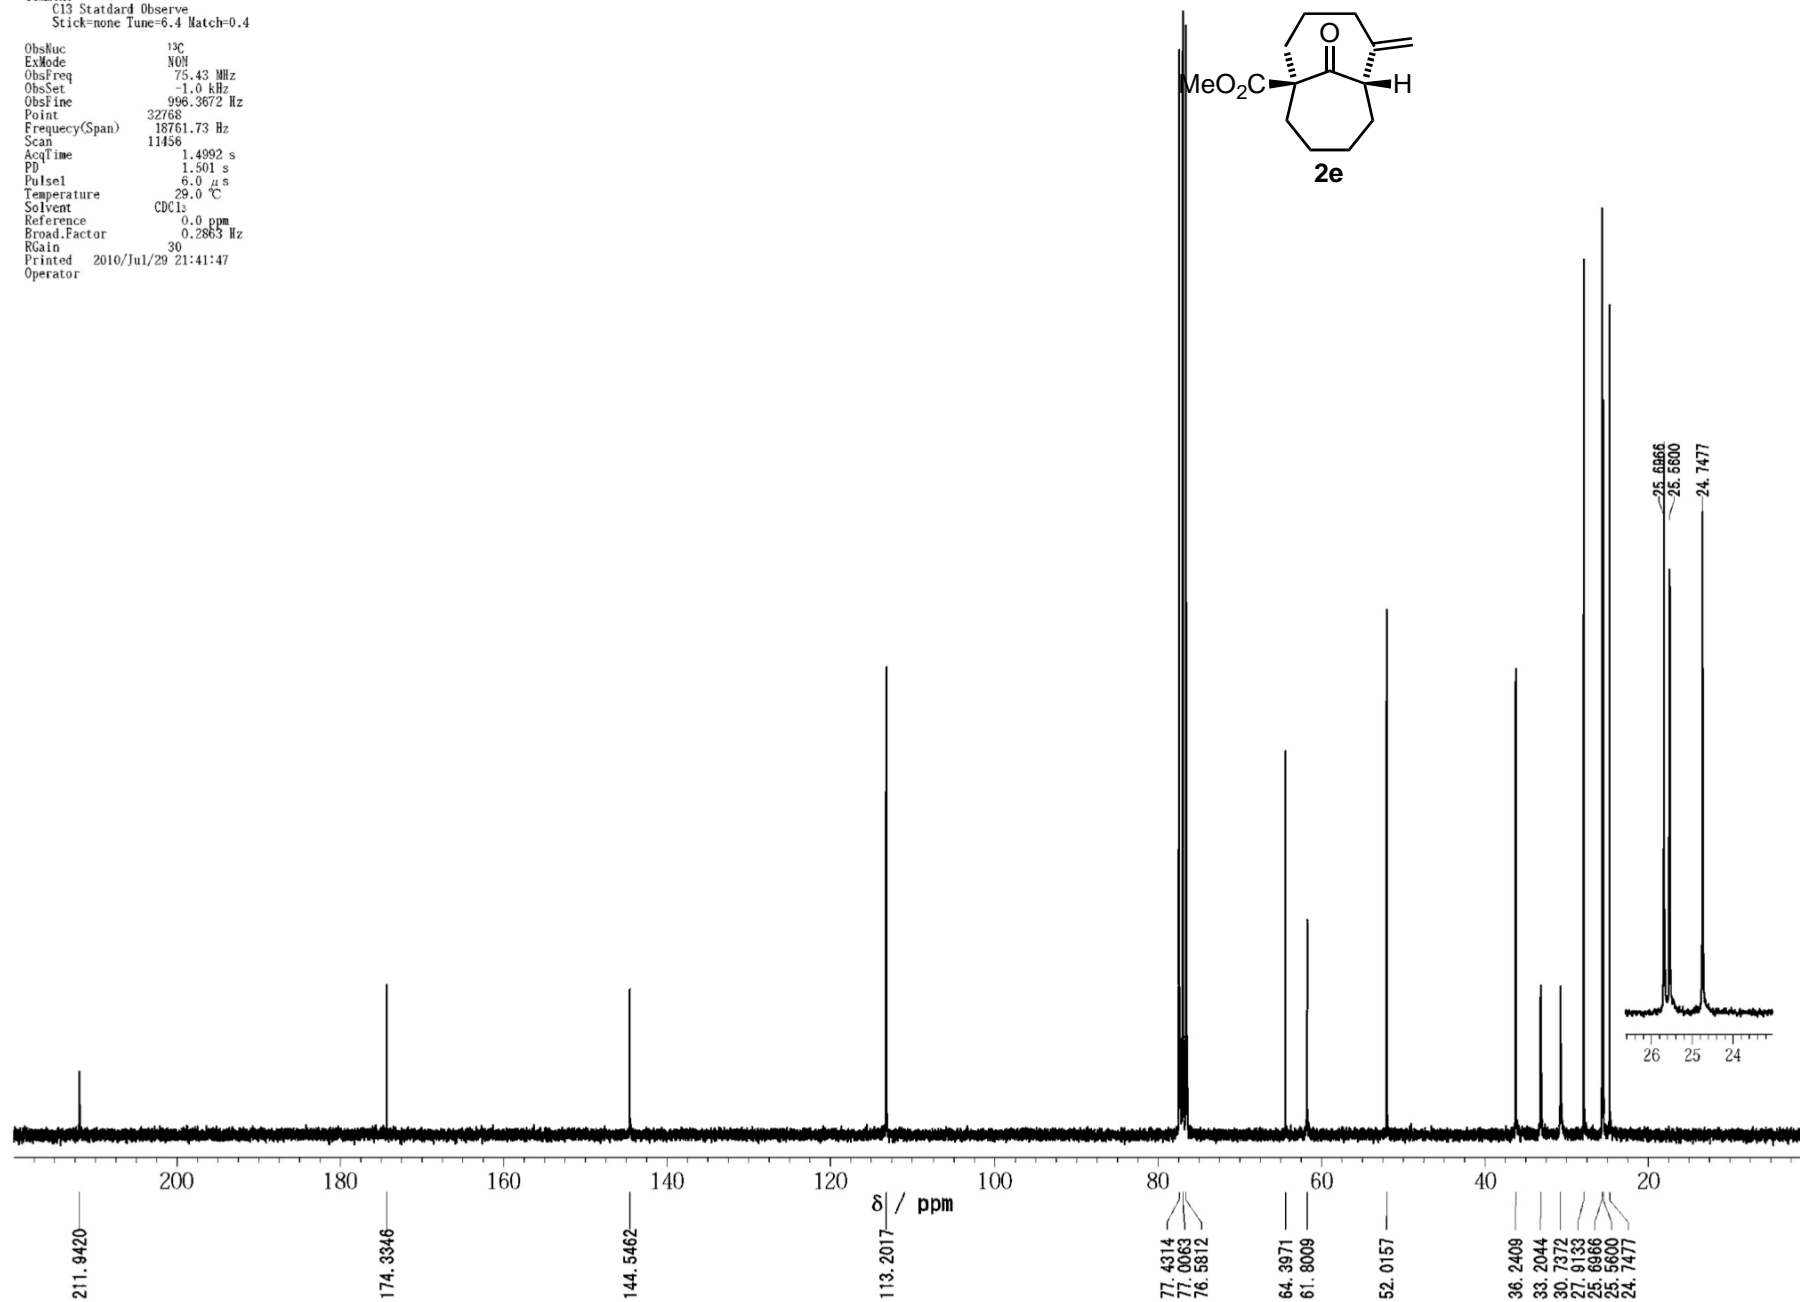

Original File:  
Date Jul 3 10  
Comment  
STANDARD 1H OBSERVE

ObsRuoc 1H  
ExMode NMR  
ObsFreq 299.96 MHz  
ObsSet -1.0 kHz  
ObsFine 995.0047 Hz  
Point 16384  
Frequency(Span) 4500.45 Hz  
Scan 32  
AcqTime 3.4983 s  
PD 1.502 s  
Pulse1 6.0  $\mu$ s  
Temperature 29.0  $^{\circ}$ C  
Solvent CDCl<sub>3</sub>  
Reference 0.0 ppm  
Broad.Factor 0.1373 Hz  
RGain 13  
Printed 2010/Jul/29 21:50:49  
Operator

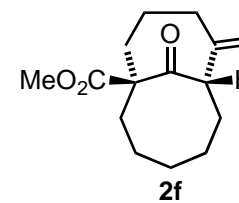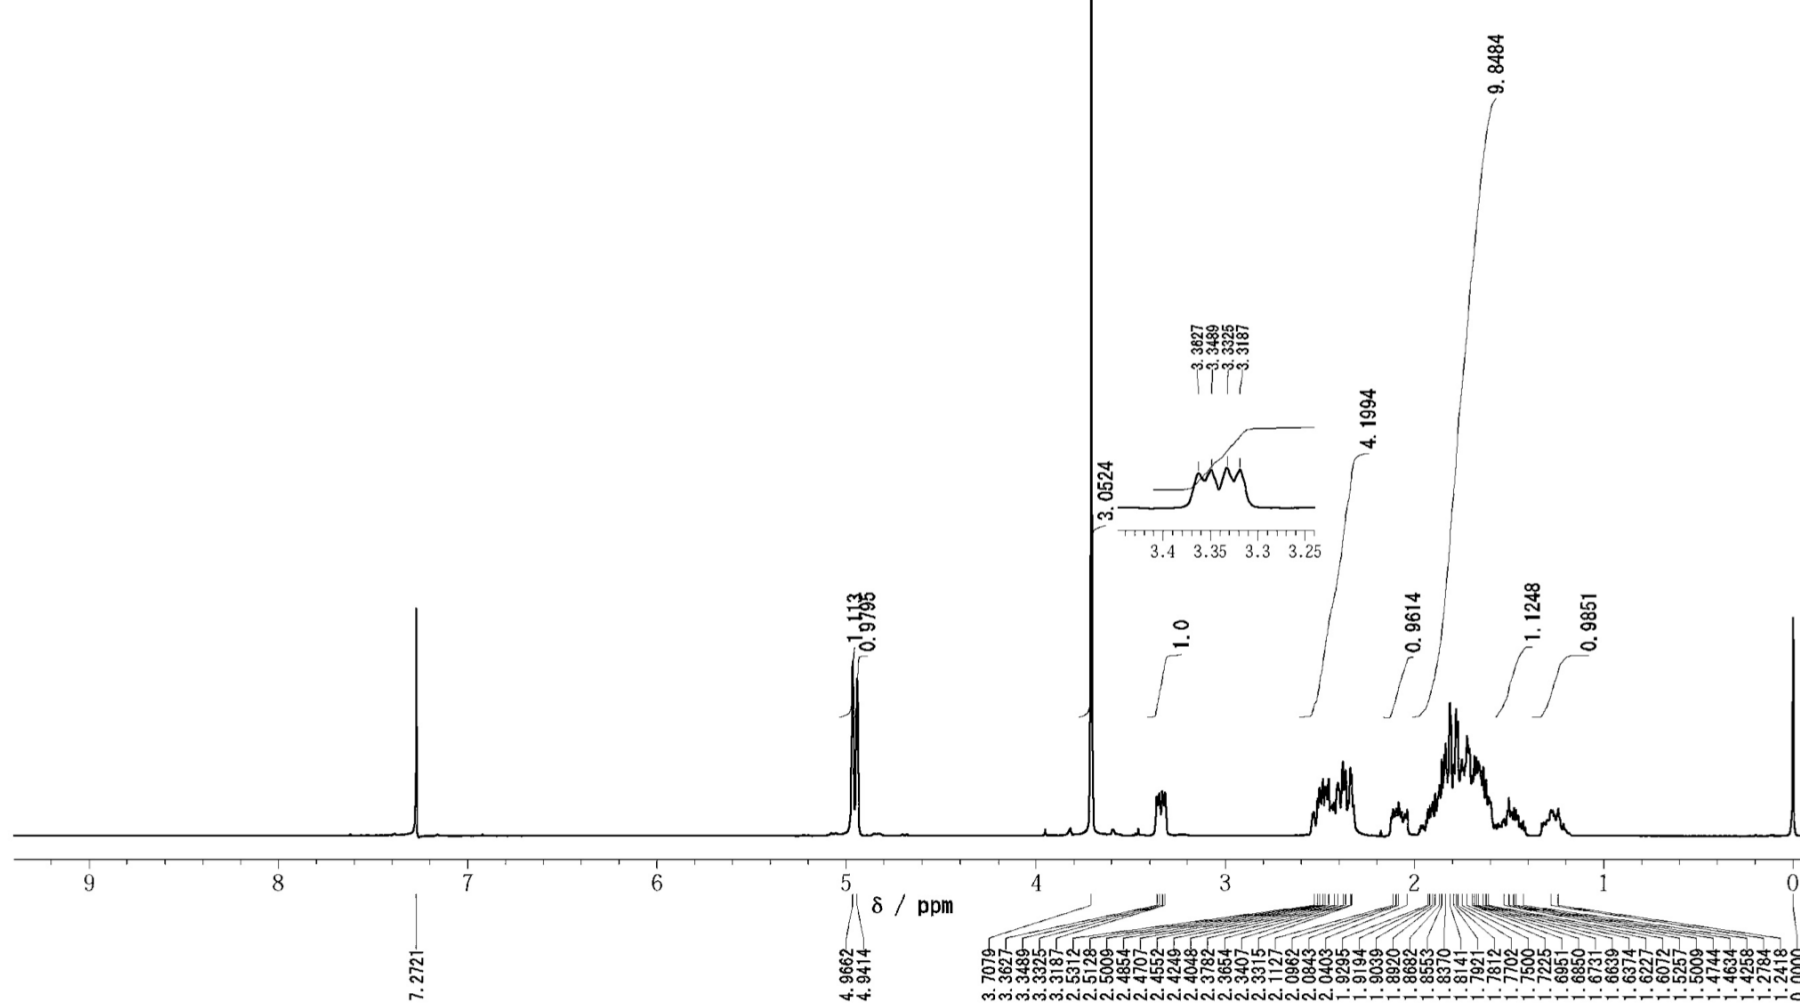

Original File:  
 Date Jul 3 10  
 Comment C13 Standard Observe  
 Stick=none Tune=6.4 Match=0.4

ObsRoc 13C  
 ExMode NOM  
 ObsFreq 75.43 MHz  
 ObsSet -1.0 kHz  
 ObsFine 996.3672 Hz  
 Point 32768  
 Frequency(Span) 18761.73 Hz  
 Scan 10944  
 AcqTime 1.4992 s  
 PD 1.501 s  
 Pulse1 6.0  $\mu$ s  
 Temperature 29.0  $^{\circ}$ C  
 Solvent CDCl<sub>3</sub>  
 Reference 77.0 ppm  
 Broad.Factor 0.2863 Hz  
 RGain 30  
 Printed 2010/Jul/29 21:53:08  
 Operator

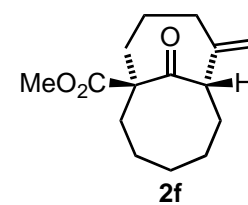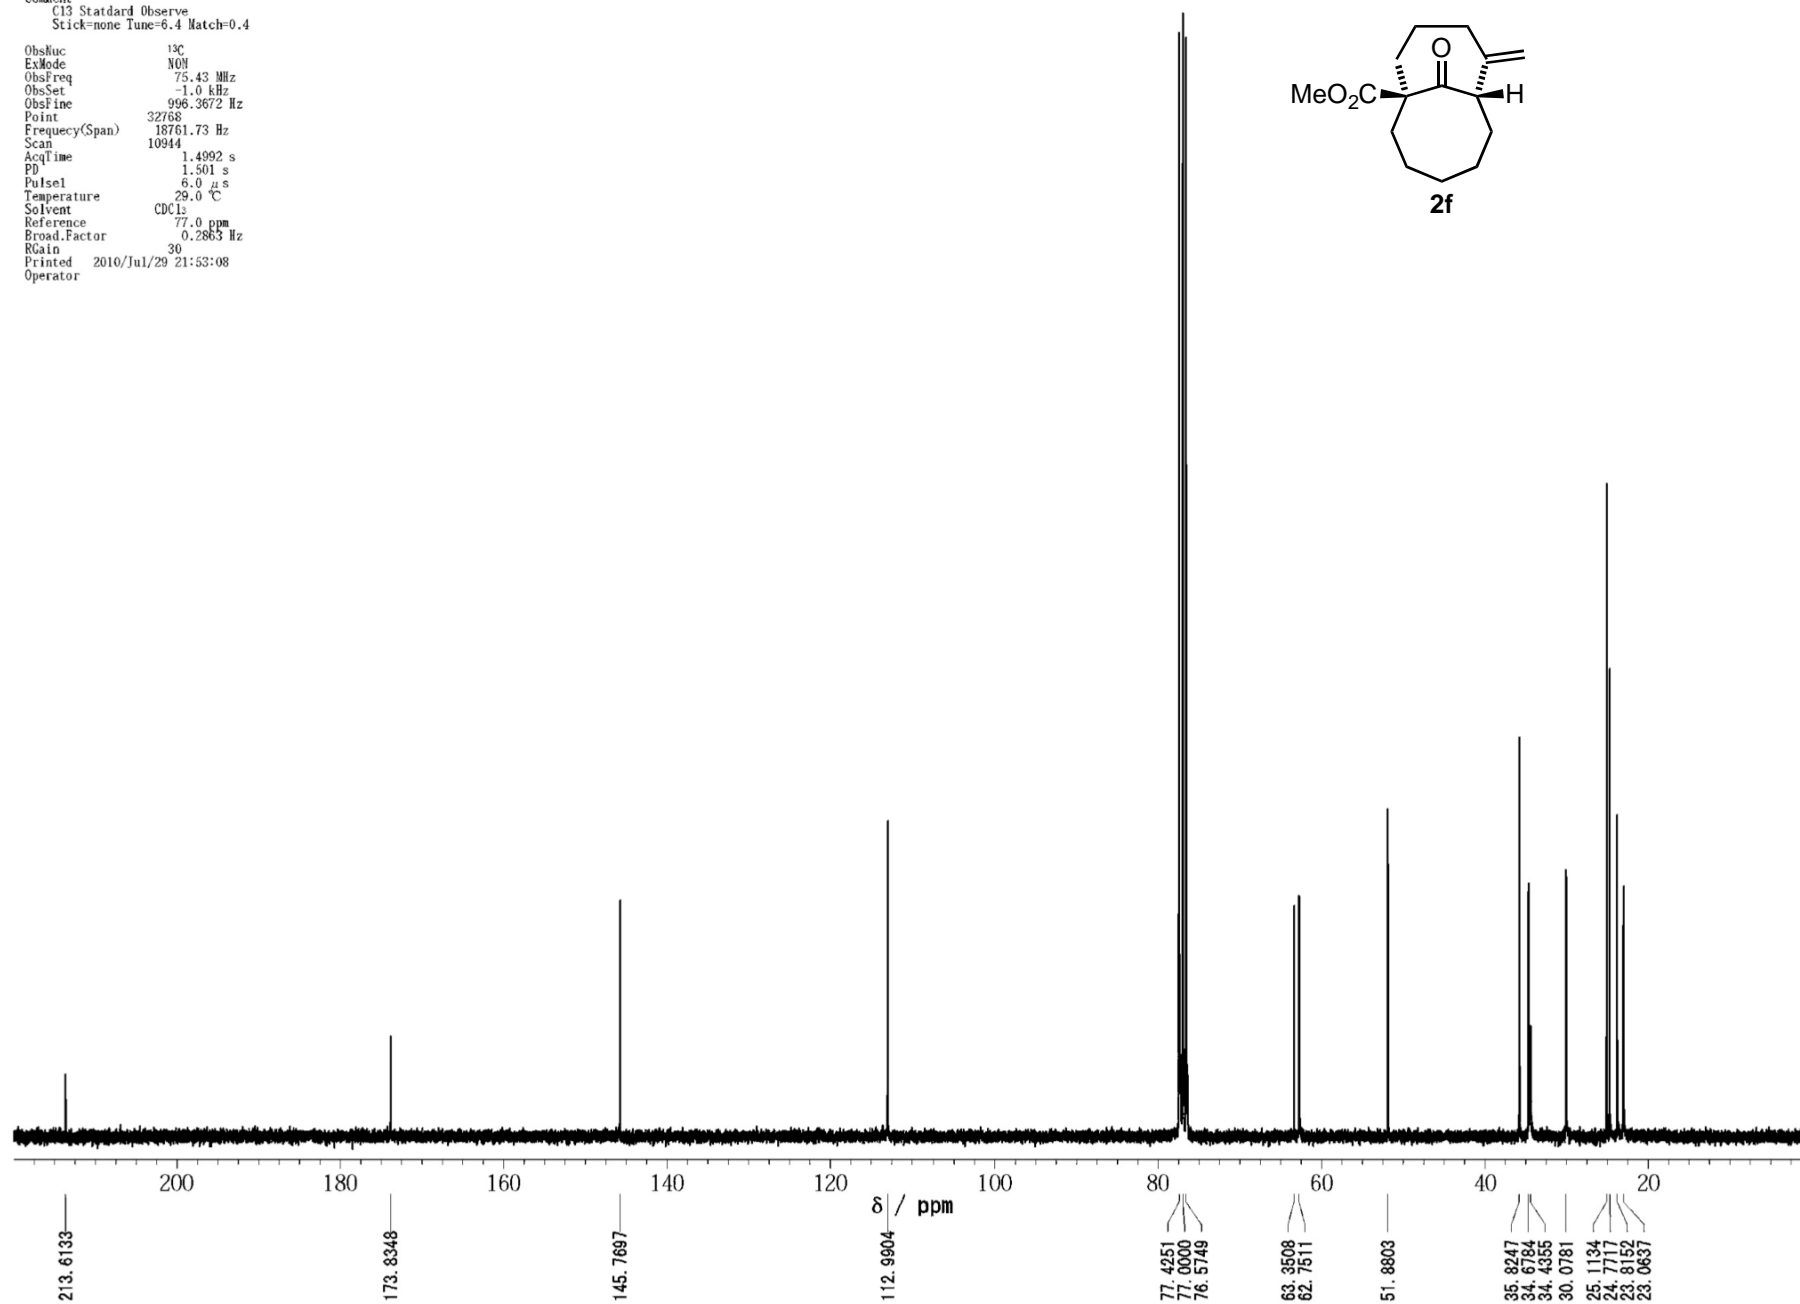

Original File:  
Date Jun 22 10  
Comment  
STANDARD 1H OBSERVE

ObsRuoc <sup>1</sup>H  
ExMode NMR  
ObsFreq 299.96 MHz  
ObsSet -1.0 kHz  
ObsFine 995.0047 Hz  
Point 16384  
Frequency(Span) 4500.45 Hz  
Scan 32  
AcqTime 3.4983 s  
PD 1.502 s  
Pulse1 6.0  $\mu$ s  
Temperature 29.0  $^{\circ}$ C  
Solvent CDCl<sub>3</sub>  
Reference 0.0 ppm  
Broad.Factor 0.1373 Hz  
RGain 17  
Printed 2010/Jul/29 22:12:07  
Operator

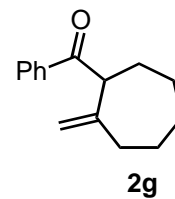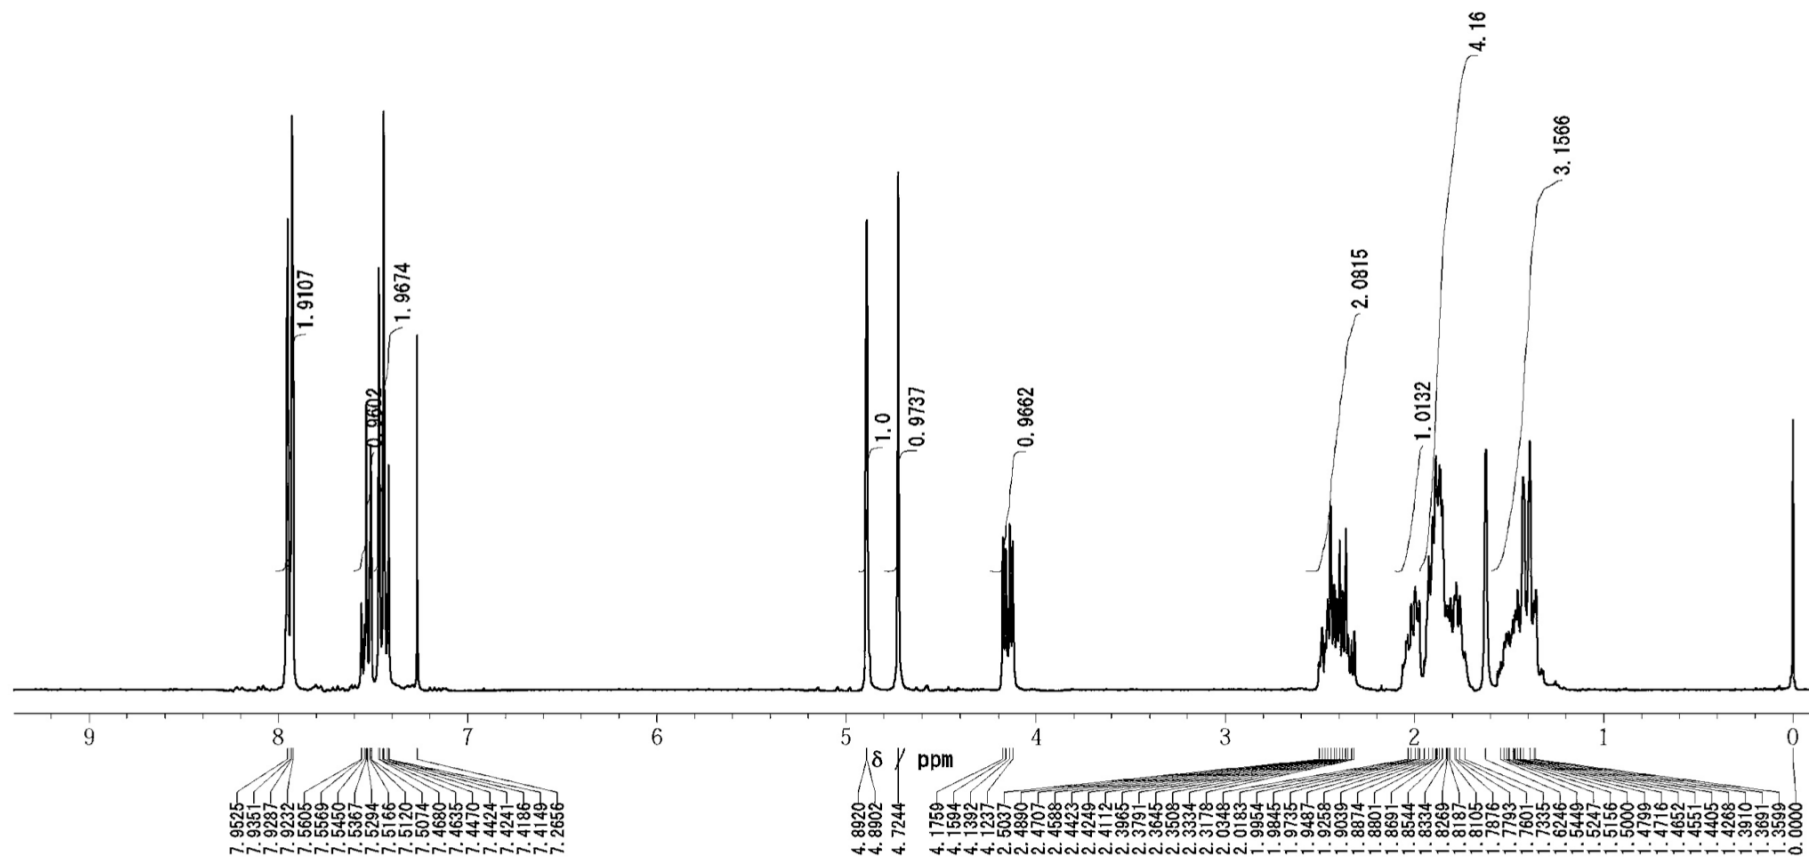



Original File:  
 Date Jun 22 10  
 Comment  
 C13 Standard Observe  
 Stick=none Tune=6.4 Match=0.4

ObsRoc 13C  
 ExMode N0H  
 ObsFreq 75.43 MHz  
 ObsSet -1.0 kHz  
 ObsFine 996.3672 Hz  
 Point 32768  
 Frequency(Span) 18761.73 Hz  
 Scan 11008  
 AcqTime 1.4992 s  
 PD 1.501 s  
 Pulse 6.0  $\mu$ s  
 Temperature 29.0  $^{\circ}$ C  
 Solvent CDCl<sub>3</sub>  
 Reference 77.0 ppm  
 Broad.Factor 0.2863 Hz  
 RGain 30  
 Printed 2010/Jul/29 22:13:33  
 Operator

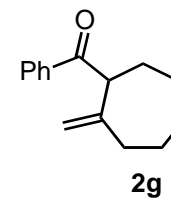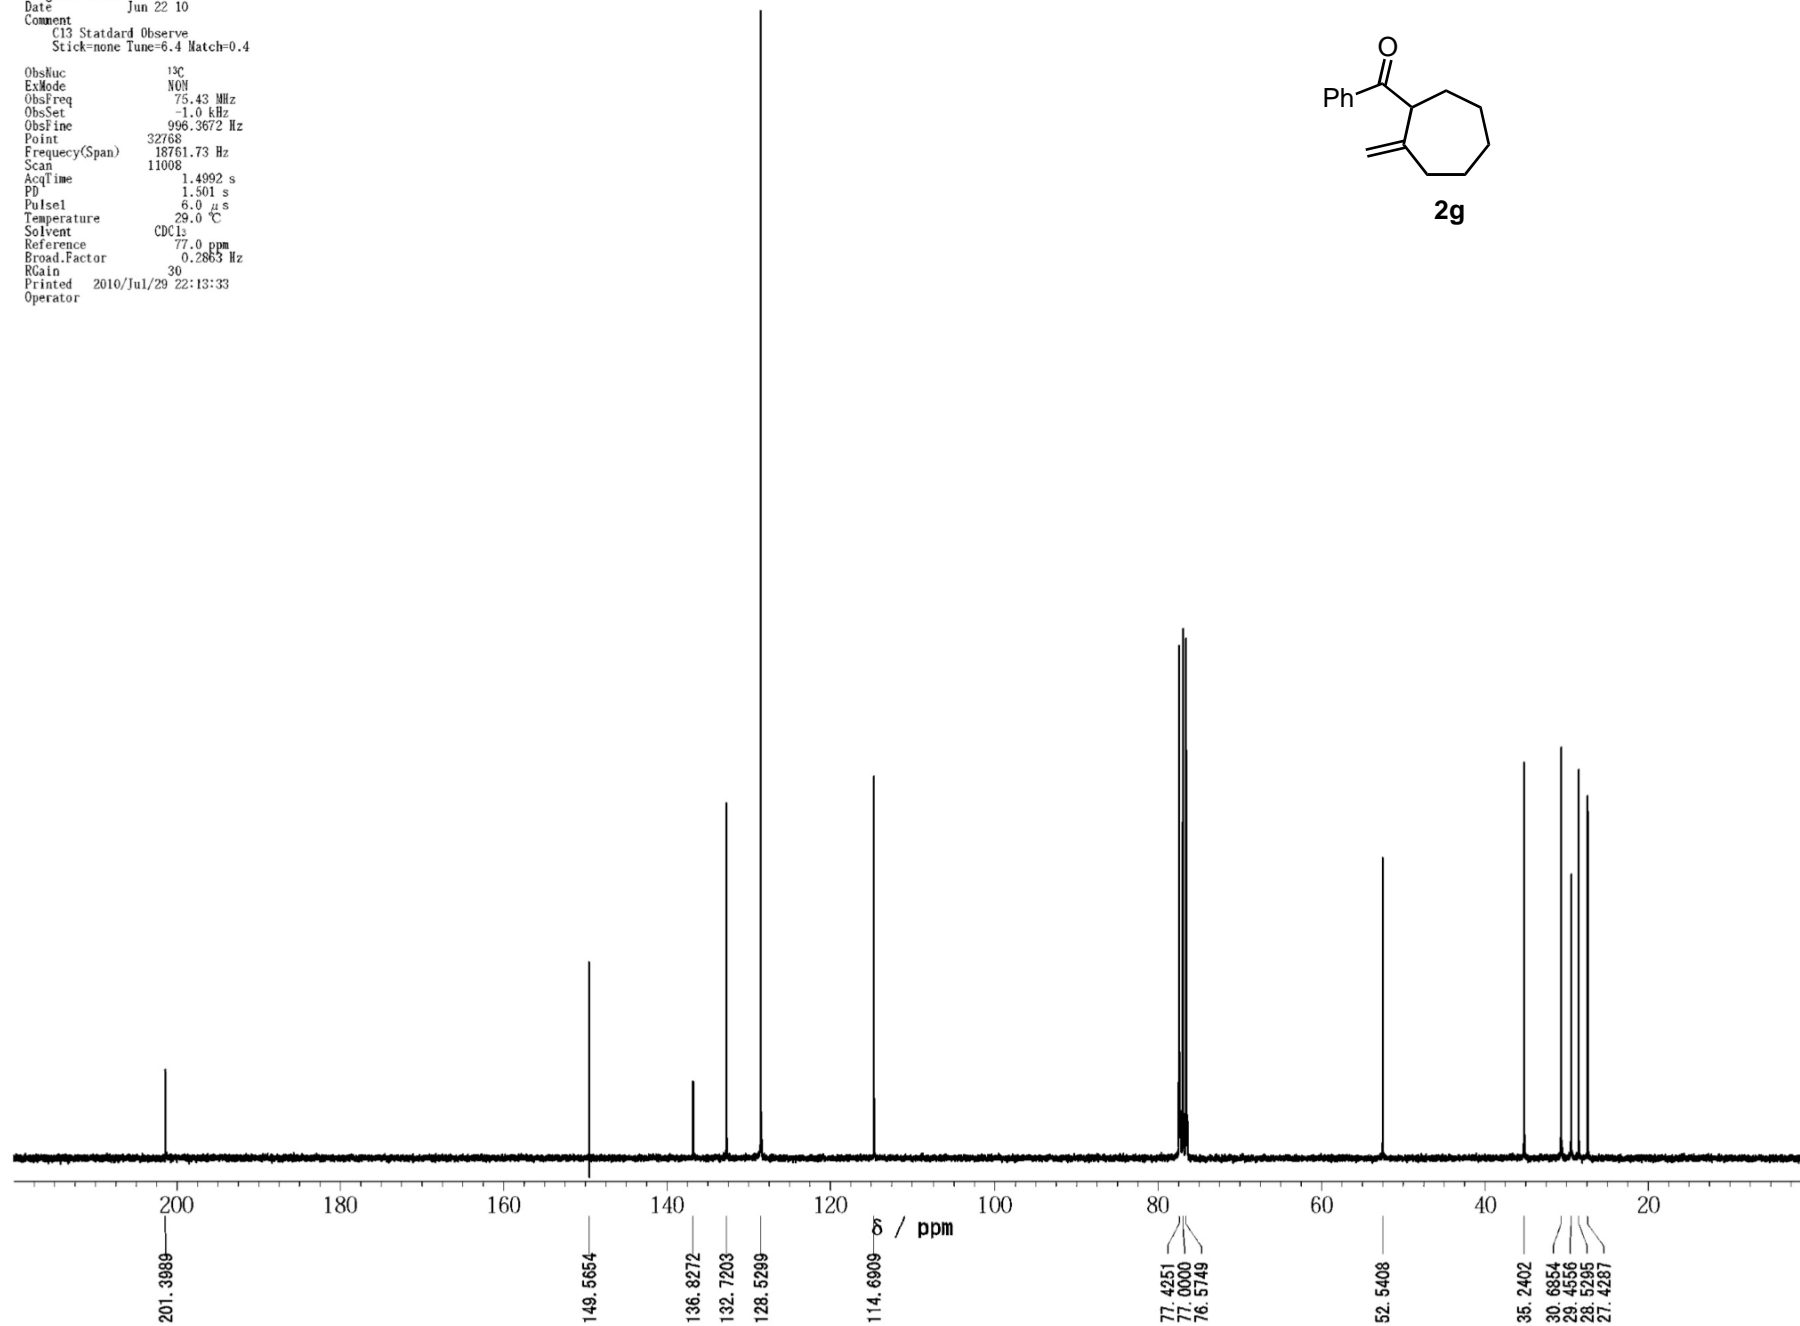

|                 |                   |                |
|-----------------|-------------------|----------------|
| Obsluc          |                   | <sup>1</sup> H |
| ExMod           |                   | NH             |
| ObsFreq         | 299.96            | MHz            |
| ObsSet          | -1.0              | kHz            |
| ObsFreq         | 995.0047          | Mz             |
| Frequency(Span) | 4500.45           | Hz             |
| Scan            | 32                |                |
| AcqTime         | 3.4983            | s              |
| PD              | 1.502             | s              |
| Pulse1          | 6.0               | μs             |
| Temperature     | 29.0              | °C             |
| Solvent         | CDCl <sub>3</sub> |                |
| Reference       | 0.0               | ppm            |
| Broad.Factor    | 0.1373            | Hz             |
| RGain           | 12                |                |
| Printed         | 2010/Jul/29       | 22:33:17       |
| Operator        |                   |                |

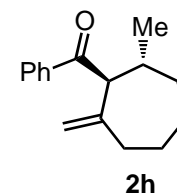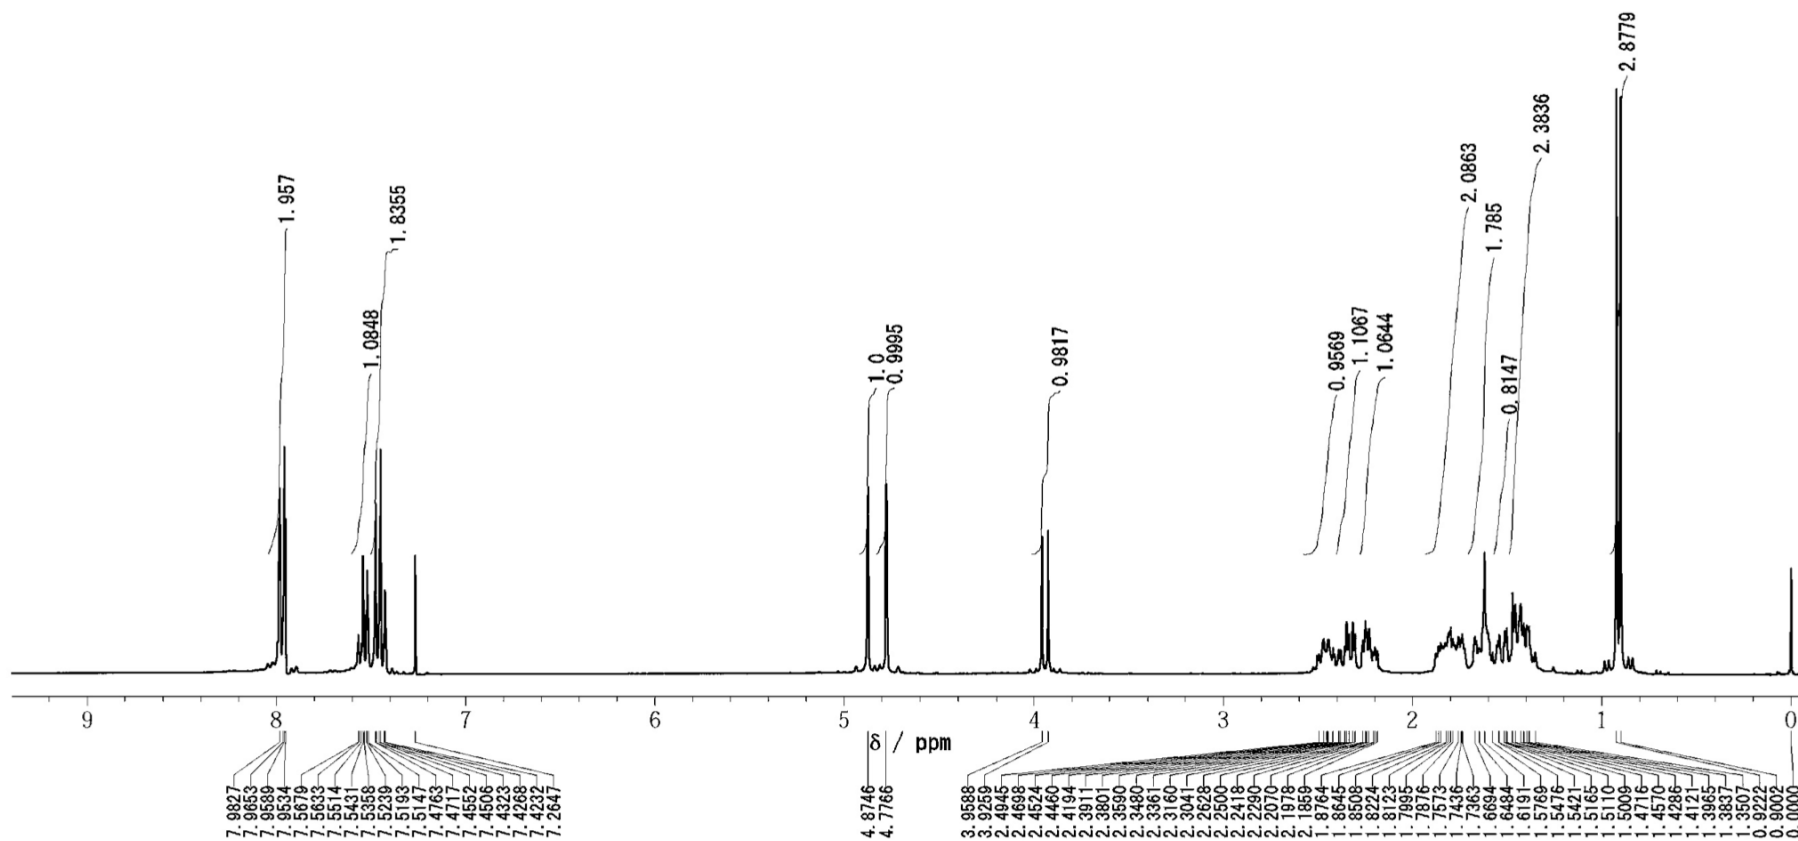

Original File:  
 Date Jun 17 10  
 Comment C13 Standard Observe  
 Stick=none Tune=6.4 Match=0.4

ObsRuc 13C  
 ExMode N0H  
 ObsFreq 75.43 MHz  
 ObsSet -1.0 kHz  
 ObsFine 996.3672 Hz  
 Point 32768  
 Frequency(Span) 18761.73 Hz  
 Scan 8768  
 AcqTime 1.4992 s  
 PD 1.501 s  
 Pulse 6.0  $\mu$ s  
 Temperature 29.0  $^{\circ}$ C  
 Solvent CDCl<sub>3</sub>  
 Reference 77.0 ppm  
 Broad.Factor 0.2863 Hz  
 RGain 30  
 Printed 2010/Jul/29 22:34:34  
 Operator

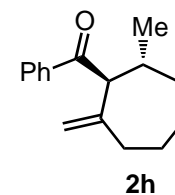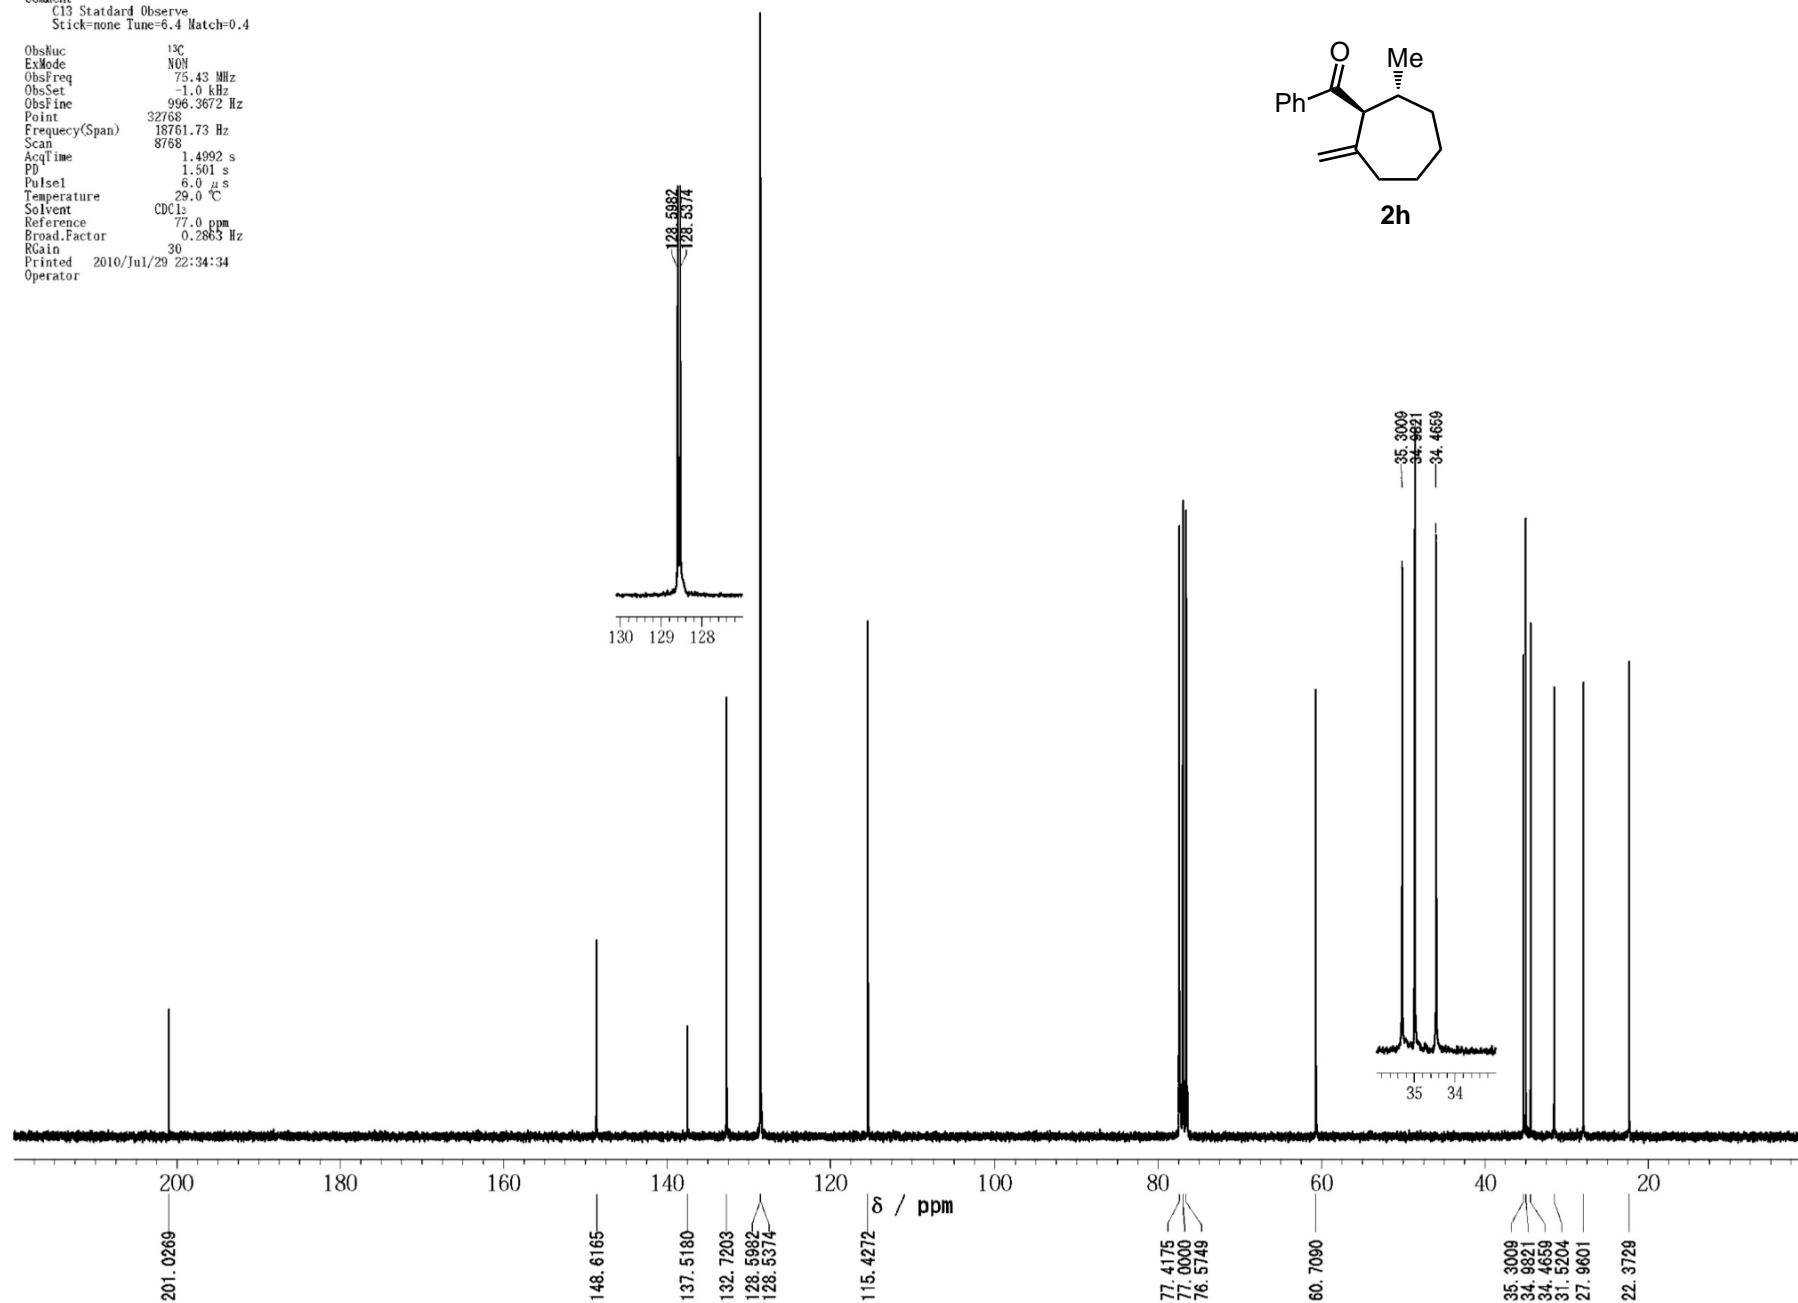

Original File: Jun 25 10  
 Date: Jun 25 10  
 Comment: STANDARD 1H OBSERVE  
 ObsRuoc: 1H  
 ExMode: NMR  
 ObsFreq: 299.96 MHz  
 ObsSet: -1.0 kHz  
 ObsFine: 995.0047 Hz  
 Point: 16384  
 Frequency(Span): 4500.45 Hz  
 Scan: 32  
 AcqTime: 3.4983 s  
 PD: 1.502 s  
 Pulse1: 6.0  $\mu$ s  
 Temperature: 29.0  $^{\circ}$ C  
 Solvent: CDCl<sub>3</sub>  
 Reference: 0.0 ppm  
 Broad.Factor: 0.1373 Hz  
 RGain: 12  
 Printed: 2010/Jul/30 09:33:58  
 Operator:

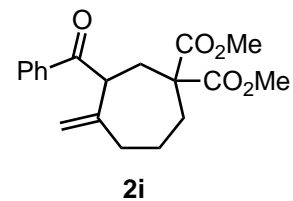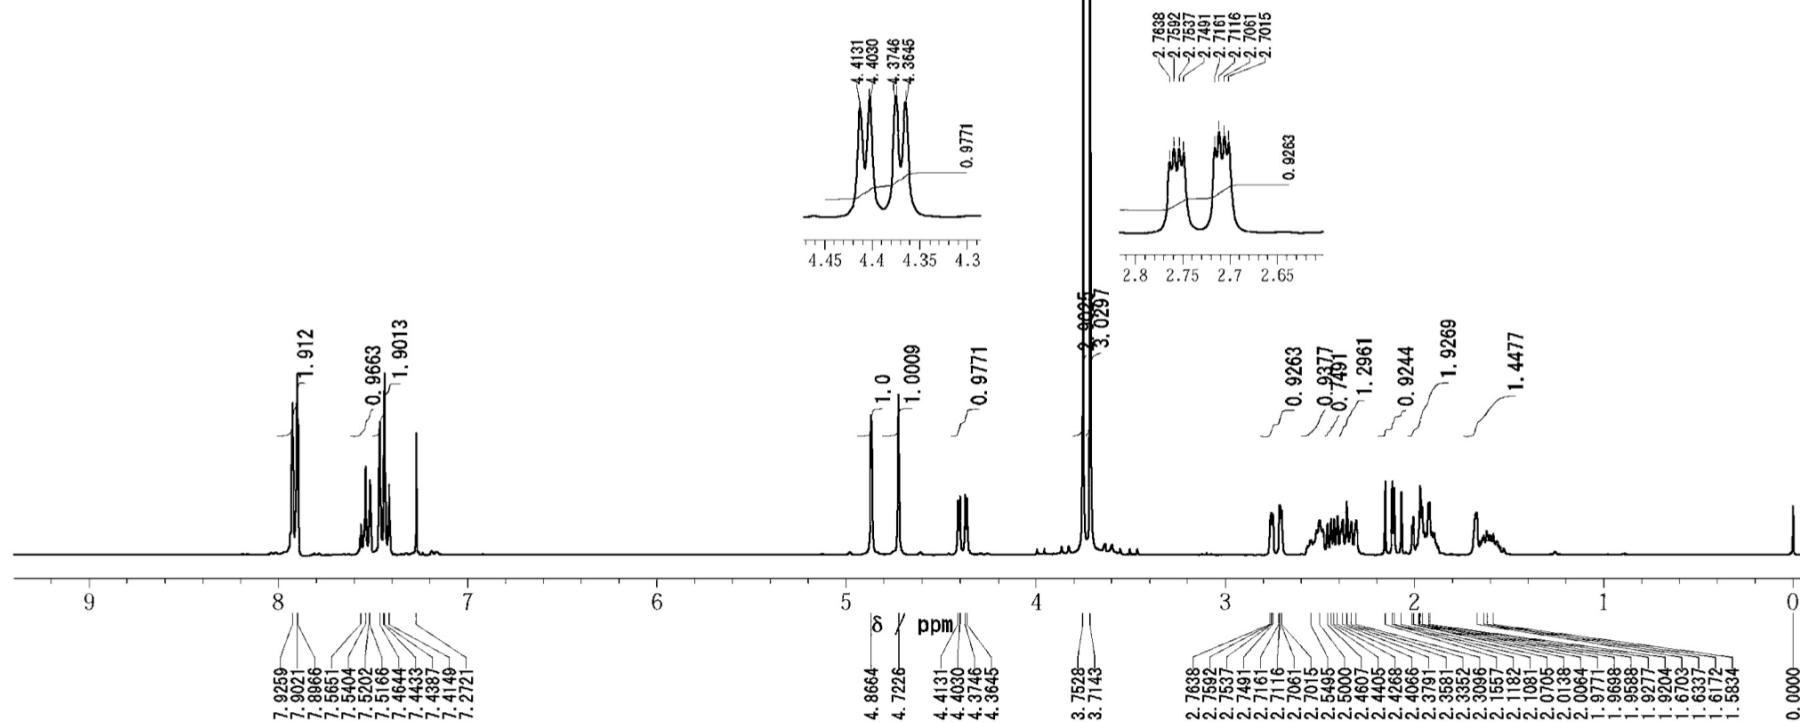

Original File:  
 Date Jun 25 10  
 Comment  
 C13 Standard Observe  
 Stick=none Tune=6.4 Match=0.4

ObsRoc 13C  
 ExMode N0H  
 ObsFreq 75.43 MHz  
 ObsSet -1.0 kHz  
 ObsFine 996.3672 Hz  
 Point 32768  
 Frequency(Span) 18761.73 Hz  
 Scan 18112  
 AcqTime 1.4992 s  
 PD 1.501 s  
 Pulse1 6.0  $\mu$ s  
 Temperature 29.0  $^{\circ}$ C  
 Solvent CDCl<sub>3</sub>  
 Reference 77.0 ppm  
 Broad.Factor 0.2863 Hz  
 RGain 30  
 Printed 2010/Jul/30 09:35:01  
 Operator

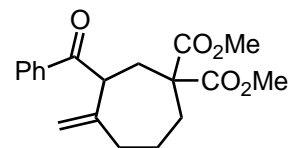

**2i**

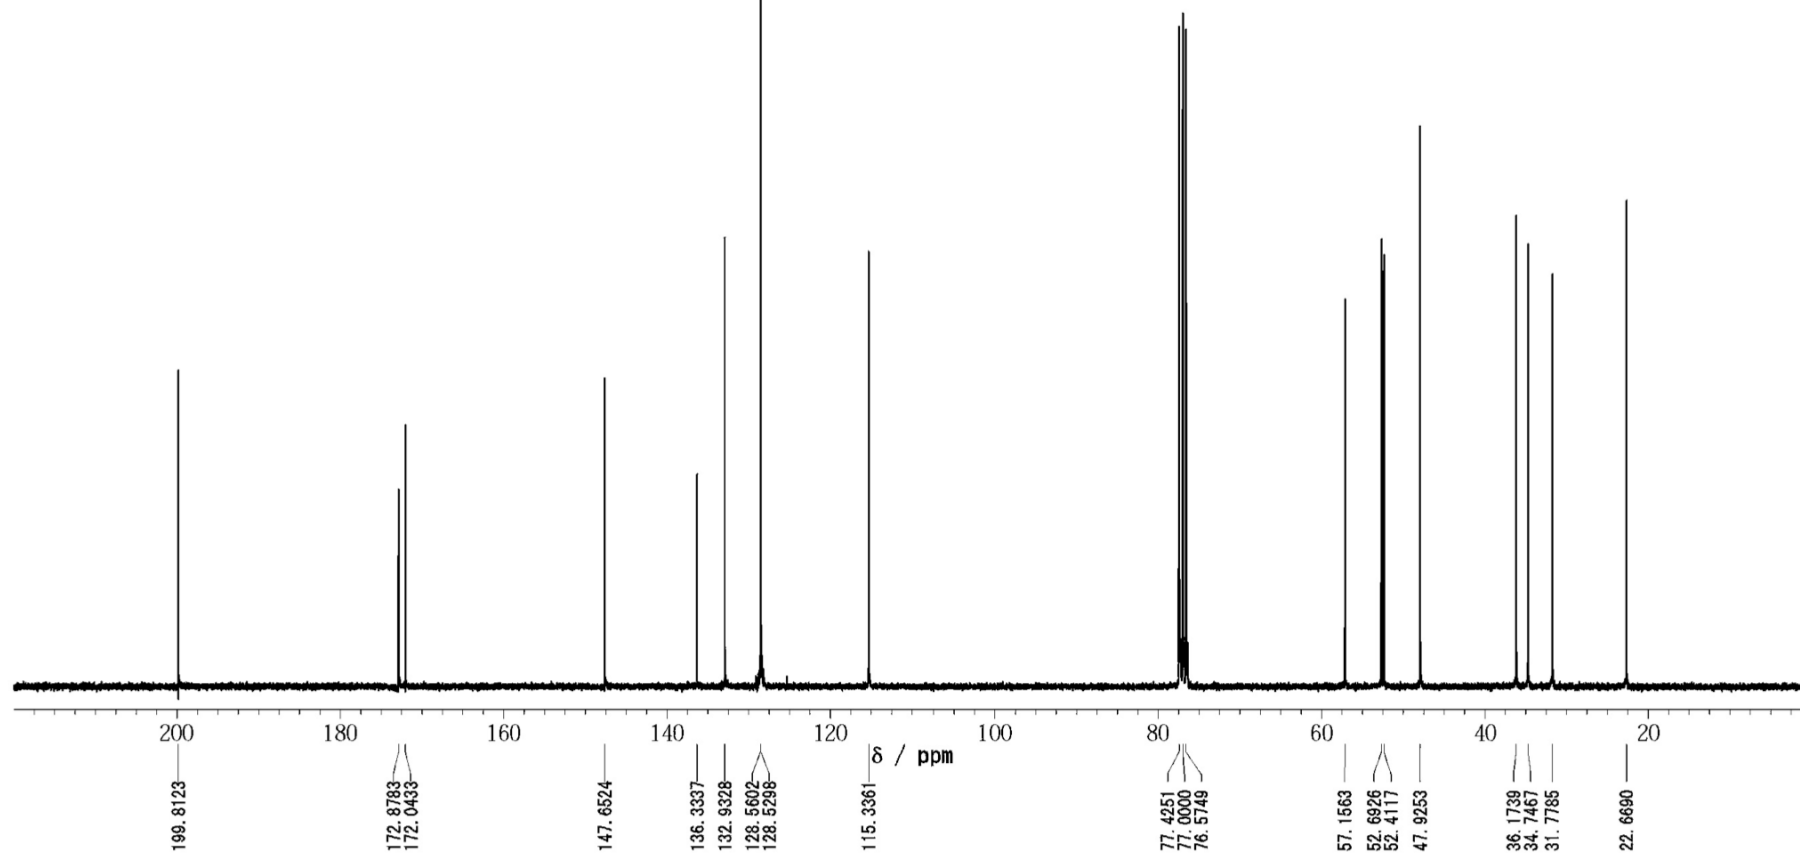

Original File: Jun 3 10  
 Date: Jun 3 10  
 Comment: STANDARD 1H OBSERVE  
 ObsRuoc: 1H  
 ExMode: NMR  
 ObsFreq: 299.96 MHz  
 ObsSet: -1.0 kHz  
 ObsFine: 995.0047 Hz  
 Point: 16384  
 Frequency(Span): 4500.45 Hz  
 Scan: 16  
 AcqTime: 3.4983 s  
 PD: 1.502 s  
 Pulse1: 6.0  $\mu$ s  
 Temperature: 29.0  $^{\circ}$ C  
 Solvent: CDCl<sub>3</sub>  
 Reference: 0.0 ppm  
 Broad.Factor: 0.1373 Hz  
 RGain: 29  
 Printed: 2010/Jul/30 09:44:56  
 Operator:

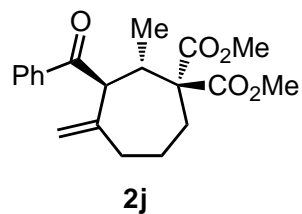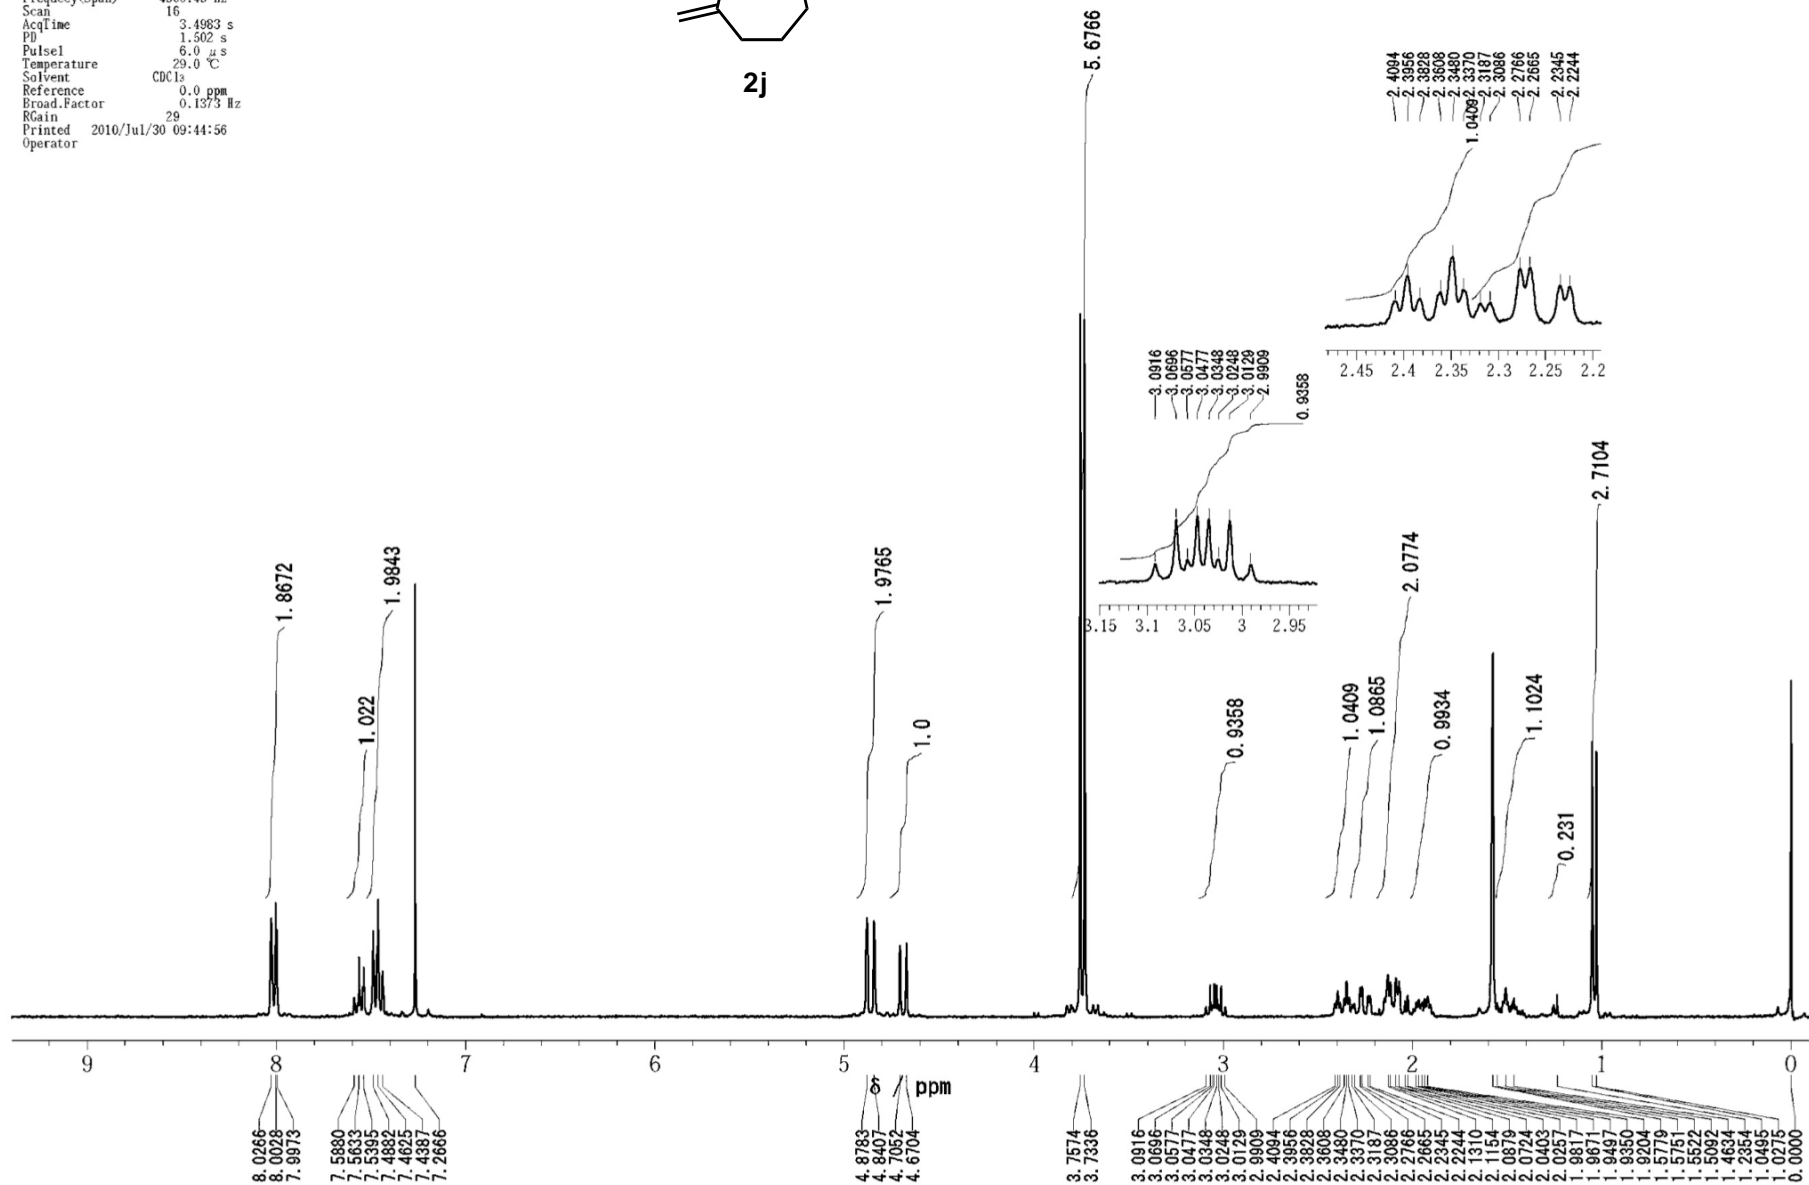

Original File: Jun 3 10  
 Date  
 Comment C13 Standard Observe  
 Stick=none Tune=6.4 Match=0.4

ObsRuc 13C  
 ExMode NOM  
 ObsFreq 75.43 MHz  
 ObsSet -1.0 kHz  
 ObsFine 996.3672 Hz  
 Point 32768  
 Frequency(Span) 18761.73 Hz  
 Scan 9920  
 AcqTime 1.4992 s  
 PD 1.501 s  
 Pulse 6.0  $\mu$ s  
 Temperature 29.0  $^{\circ}$ C  
 Solvent CDCl<sub>3</sub>  
 Reference 77.0 ppm  
 Broad.Factor 0.2863 Hz  
 RGain 30  
 Printed 2010/Jul/30 09:46:08  
 Operator

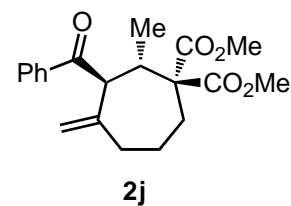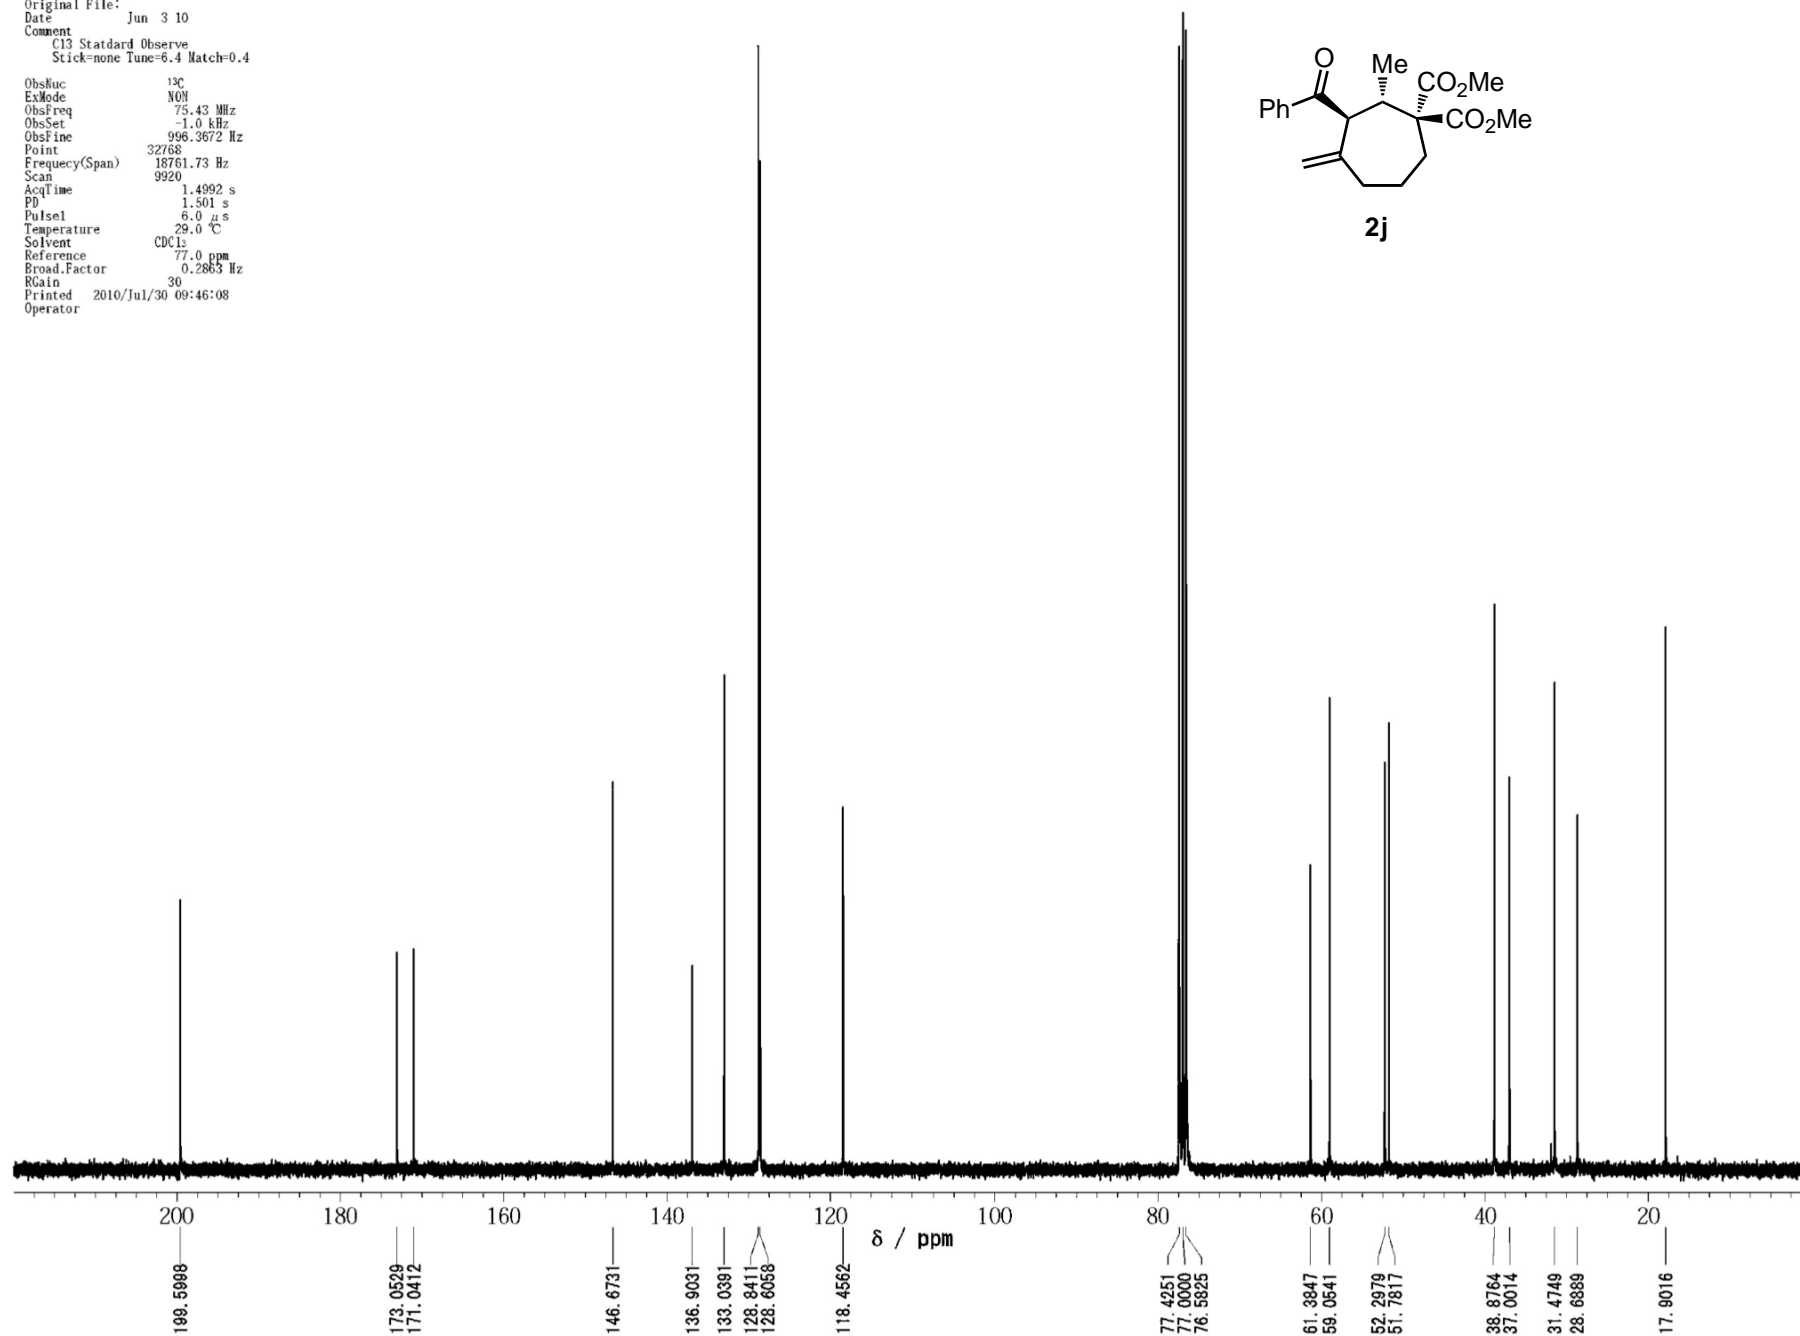

Original File:  
Date Jun 15 10  
Comment  
STANDARD 1H OBSERVE

ObsRuac 1H  
ExMode N08  
ObsFreq 299.96 MHz  
ObsSet -1.0 kHz  
ObsFine 995.0047 Hz  
Point 16384  
Frequency(Span) 4500.45 Hz  
Scan 32  
AcqTime 3.4983 s  
PD 1.502 s  
Pulse1 6.0  $\mu$ s  
Temperature 29.0  $^{\circ}$ C  
Solvent CDCl<sub>3</sub>  
Reference 0.0 ppm  
Broad.Factor 0.1373 Hz  
RGain 12  
Printed 2010/Jul/30 09:58:23  
Operator

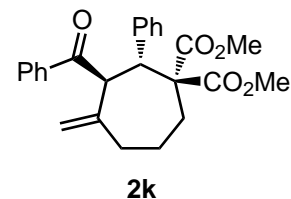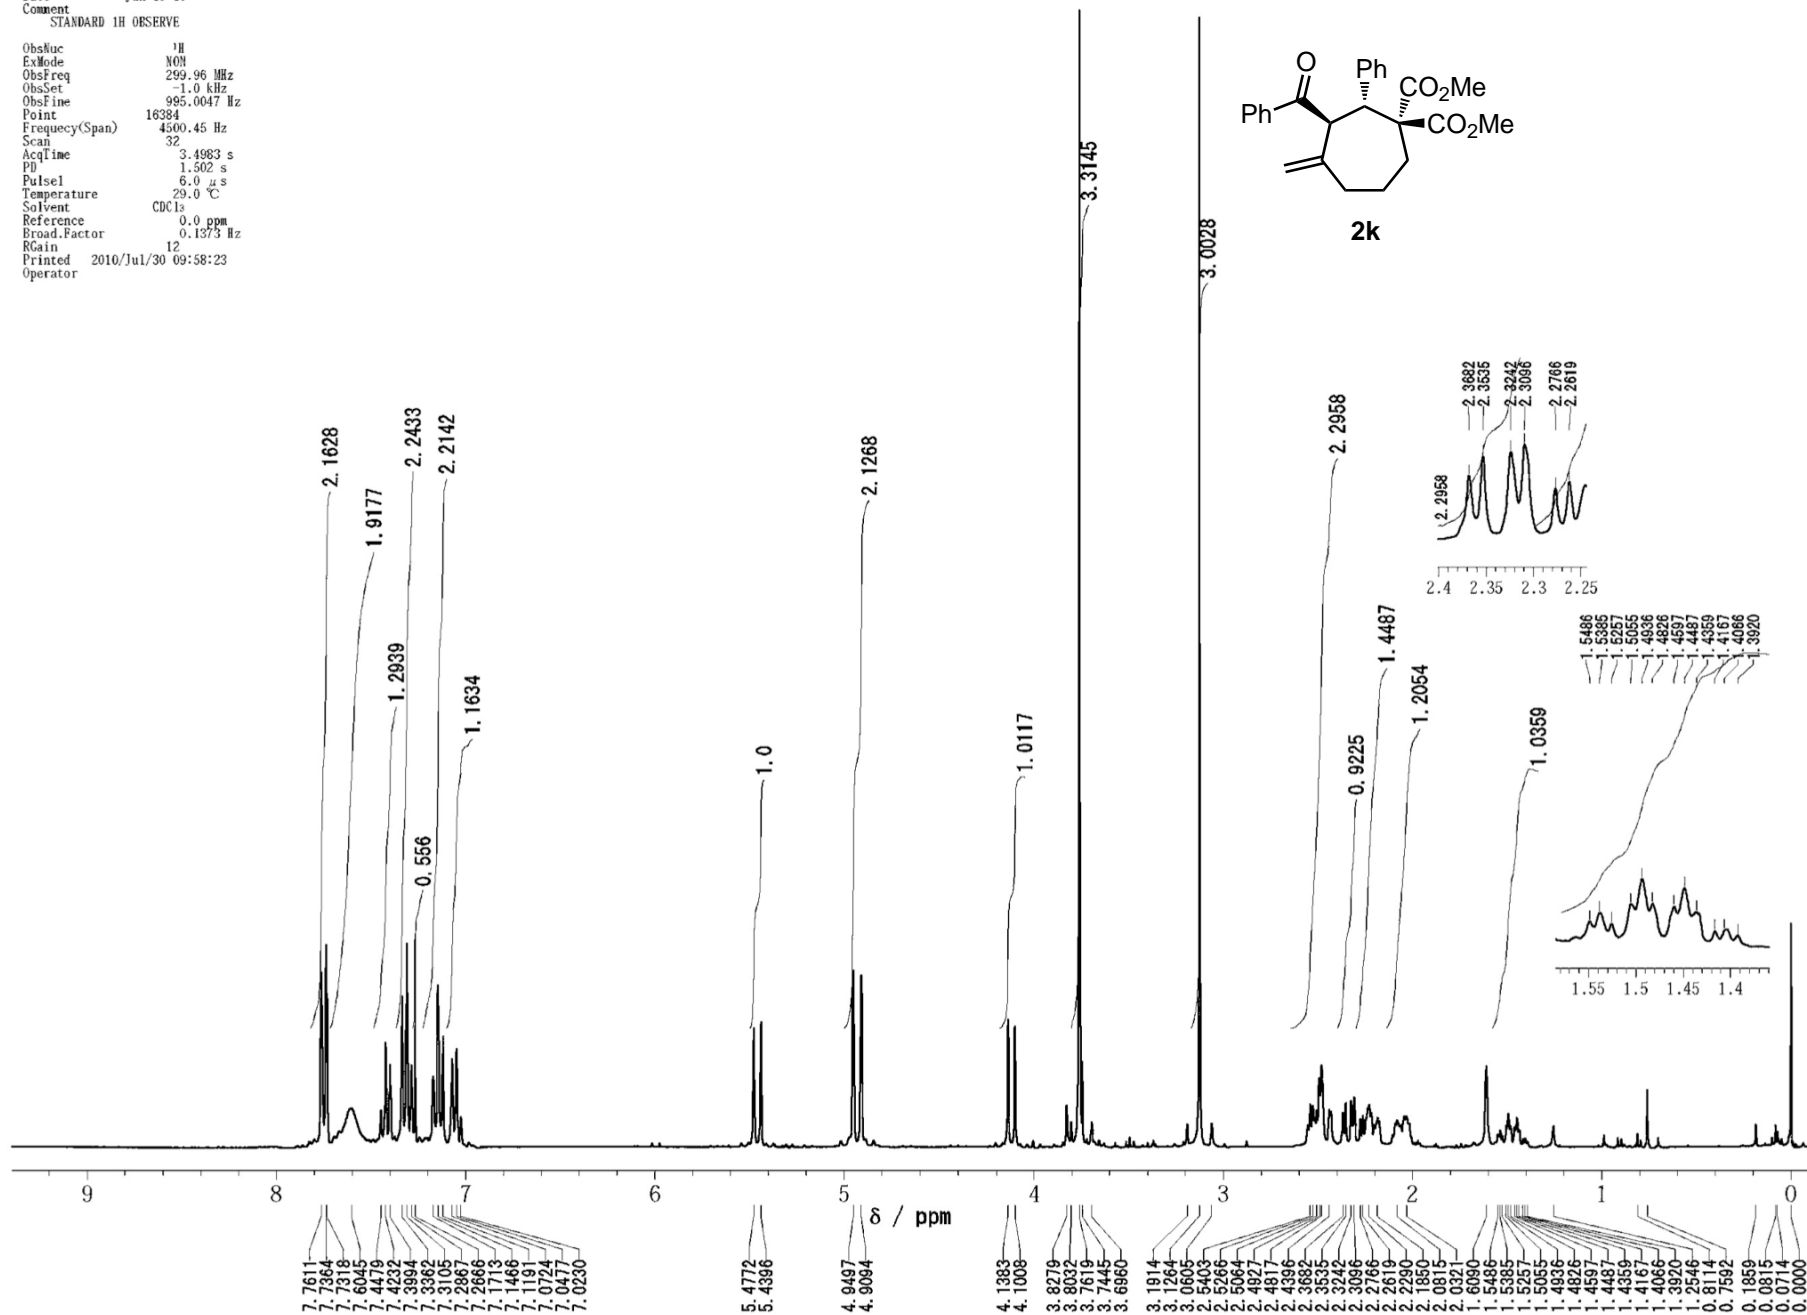



Original File:  
 Date Jun 15 10  
 Comment C13 Standard Observe  
 Stick=none Tune=6.4 Match=0.4

ObsRuc 13C  
 ExMode NOM  
 ObsFreq 75.43 MHz  
 ObsSet -1.0 kHz  
 ObsFine 996.3672 Hz  
 Point 32768  
 Frequency(Span) 18761.73 Hz  
 Scan 11136  
 AcqTime 1.4992 s  
 PD 1.501 s  
 Pulse 6.0  $\mu$ s  
 Temperature 29.0  $^{\circ}$ C  
 Solvent CDCl<sub>3</sub>  
 Reference 77.0 ppm  
 Broad.Factor 0.2863 Hz  
 RGain 30  
 Printed 2010/Jul/30 10:00:01  
 Operator

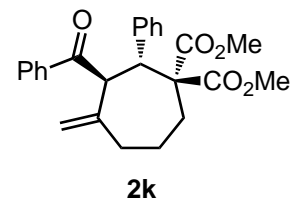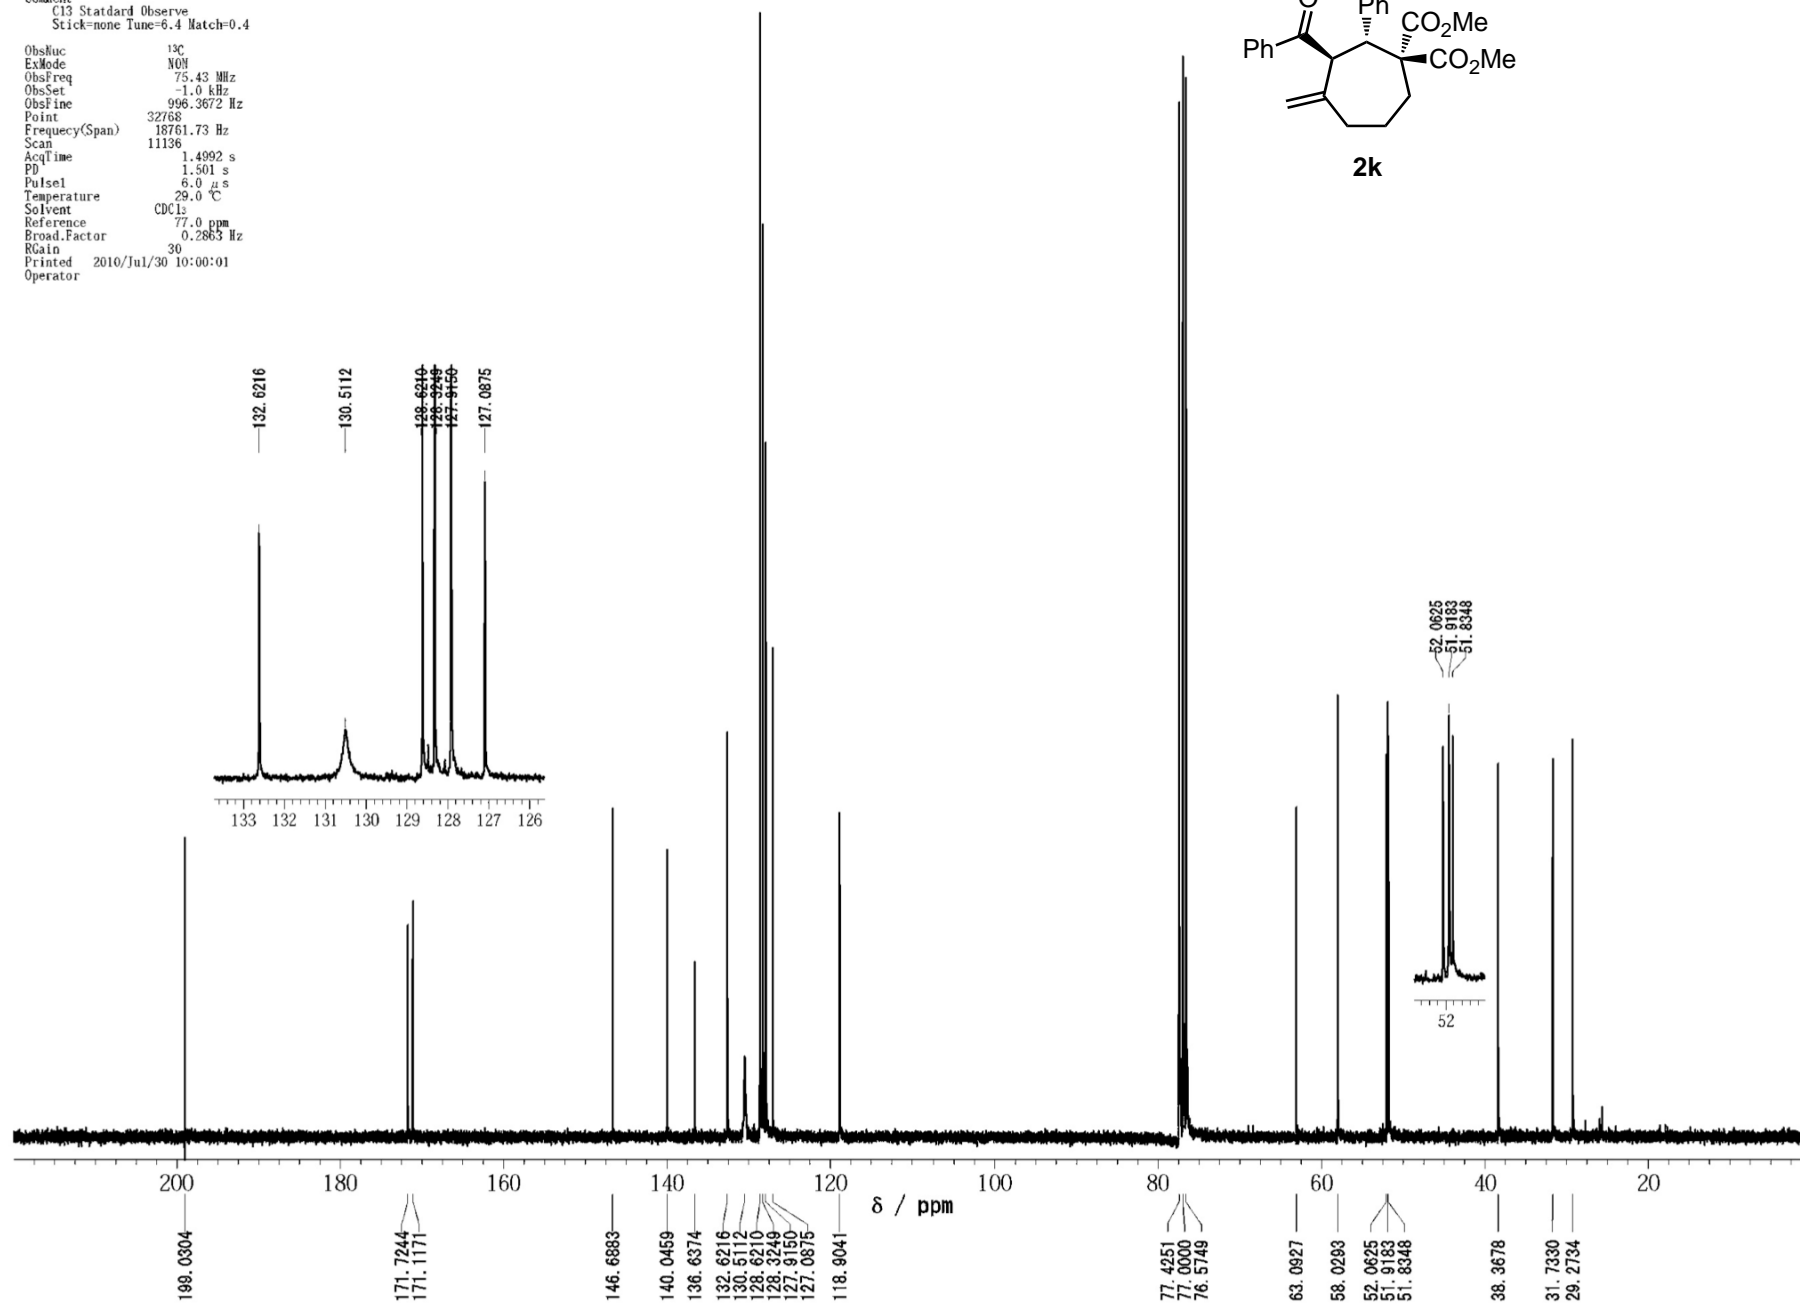

Original File:  
Date Jun 15 10  
Comment  
STANDARD 1H OBSERVE

ObsMod <sup>1</sup>H  
ExMode NOE  
ObsFreq 299.96 MHz  
ObsSet -1.0 kHz  
ObsFine 995.0047 Hz  
Point 16384  
Frequency(Span) 4500.45 Hz  
Scan 96  
AcqTime 3.4983 s  
PD 1.502 s  
Pulse1 6.0  $\mu$ s  
Temperature 29.0  $^{\circ}$ C  
Solvent CDCl<sub>3</sub>  
Reference 0.0 ppm  
Broad.Factor 0.1373 Hz  
RGain 19  
Printed 2010/Jul/30 13:33:19  
Operator

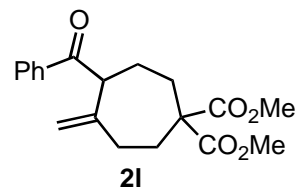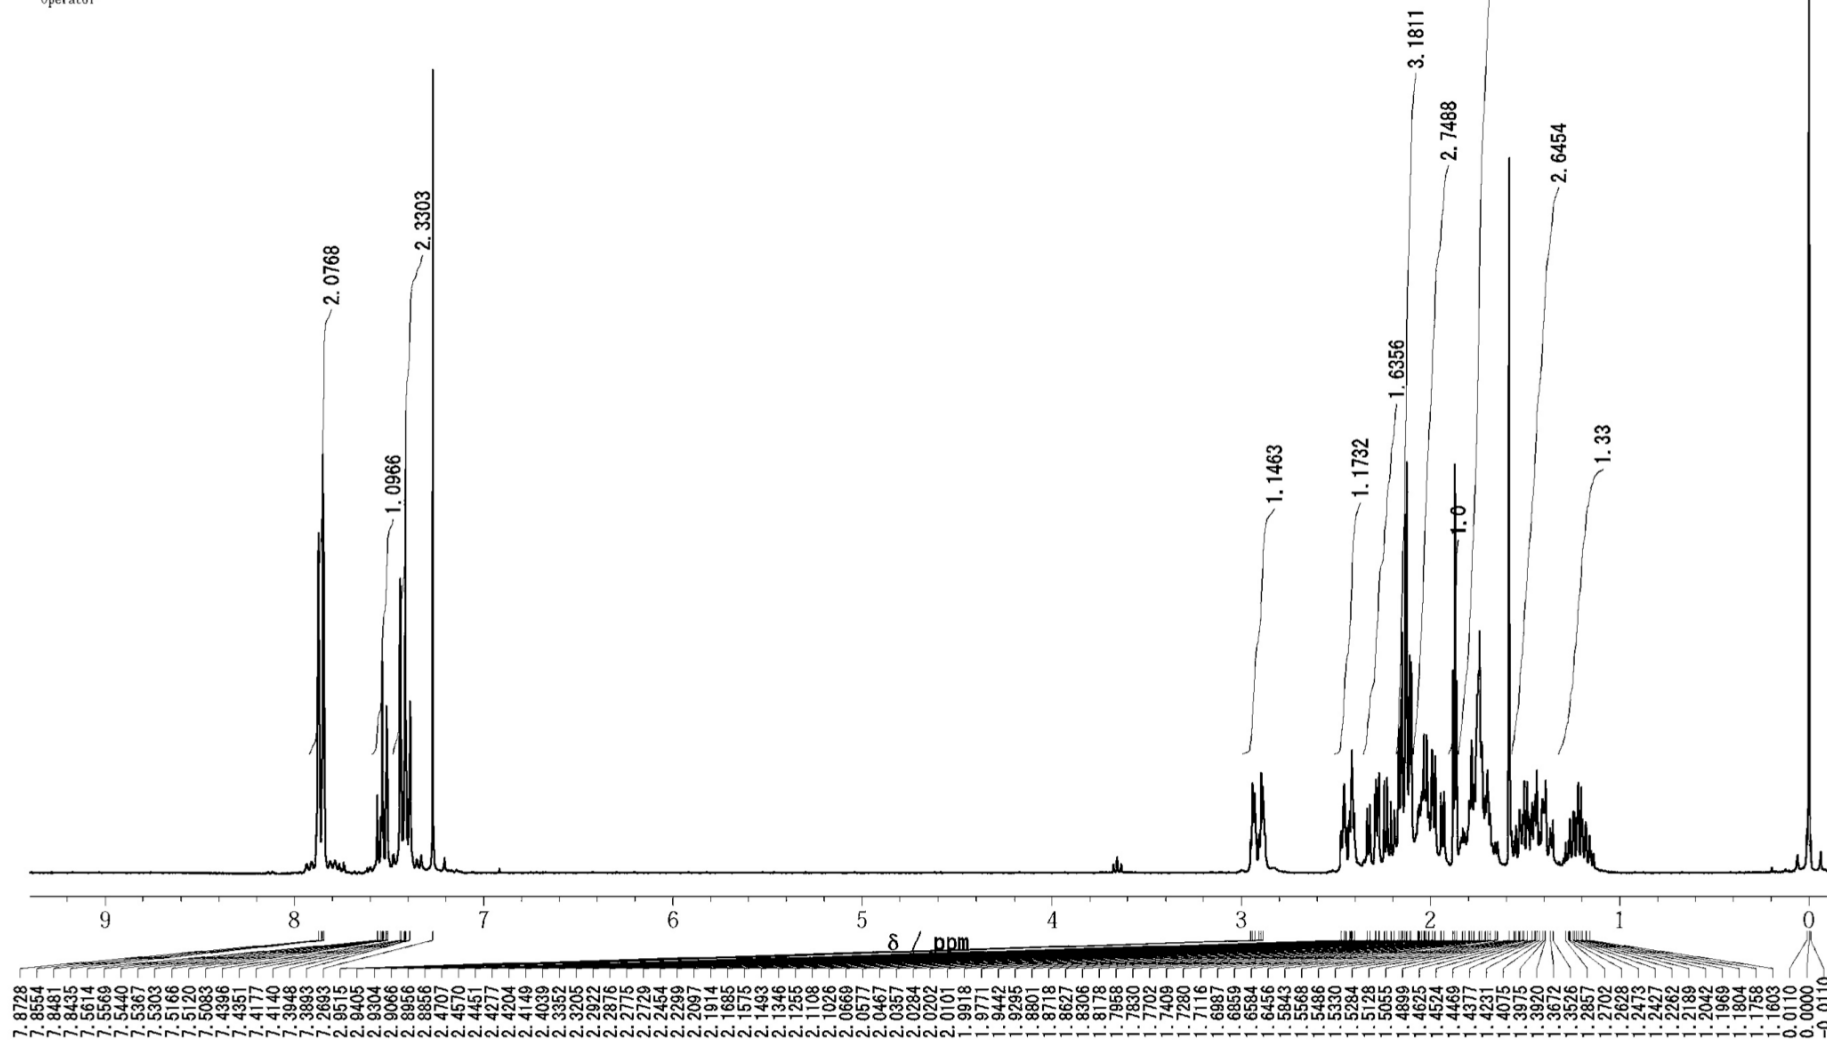

Original File:  
 Date Jun 15 10  
 Comment  
 C13 Standard Observe  
 Stick=none Tune=6.4 Match=0.4

ObsRuc 13C  
 ExMode NOM  
 ObsFreq 75.43 MHz  
 ObsSet -1.0 kHz  
 ObsFine 996.3672 Hz  
 Point 32768  
 Frequency(Span) 18761.73 Hz  
 Scan 10624  
 AcqTime 1.4992 s  
 PD 1.501 s  
 Pulse1 6.0  $\mu$ s  
 Temperature 29.0  $^{\circ}$ C  
 Solvent CDCl<sub>3</sub>  
 Reference 77.0 ppm  
 Broad.Factor 0.2863 Hz  
 RGain 30  
 Printed 2010/Jul/30 13:35:17  
 Operator

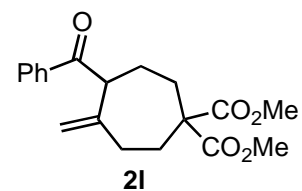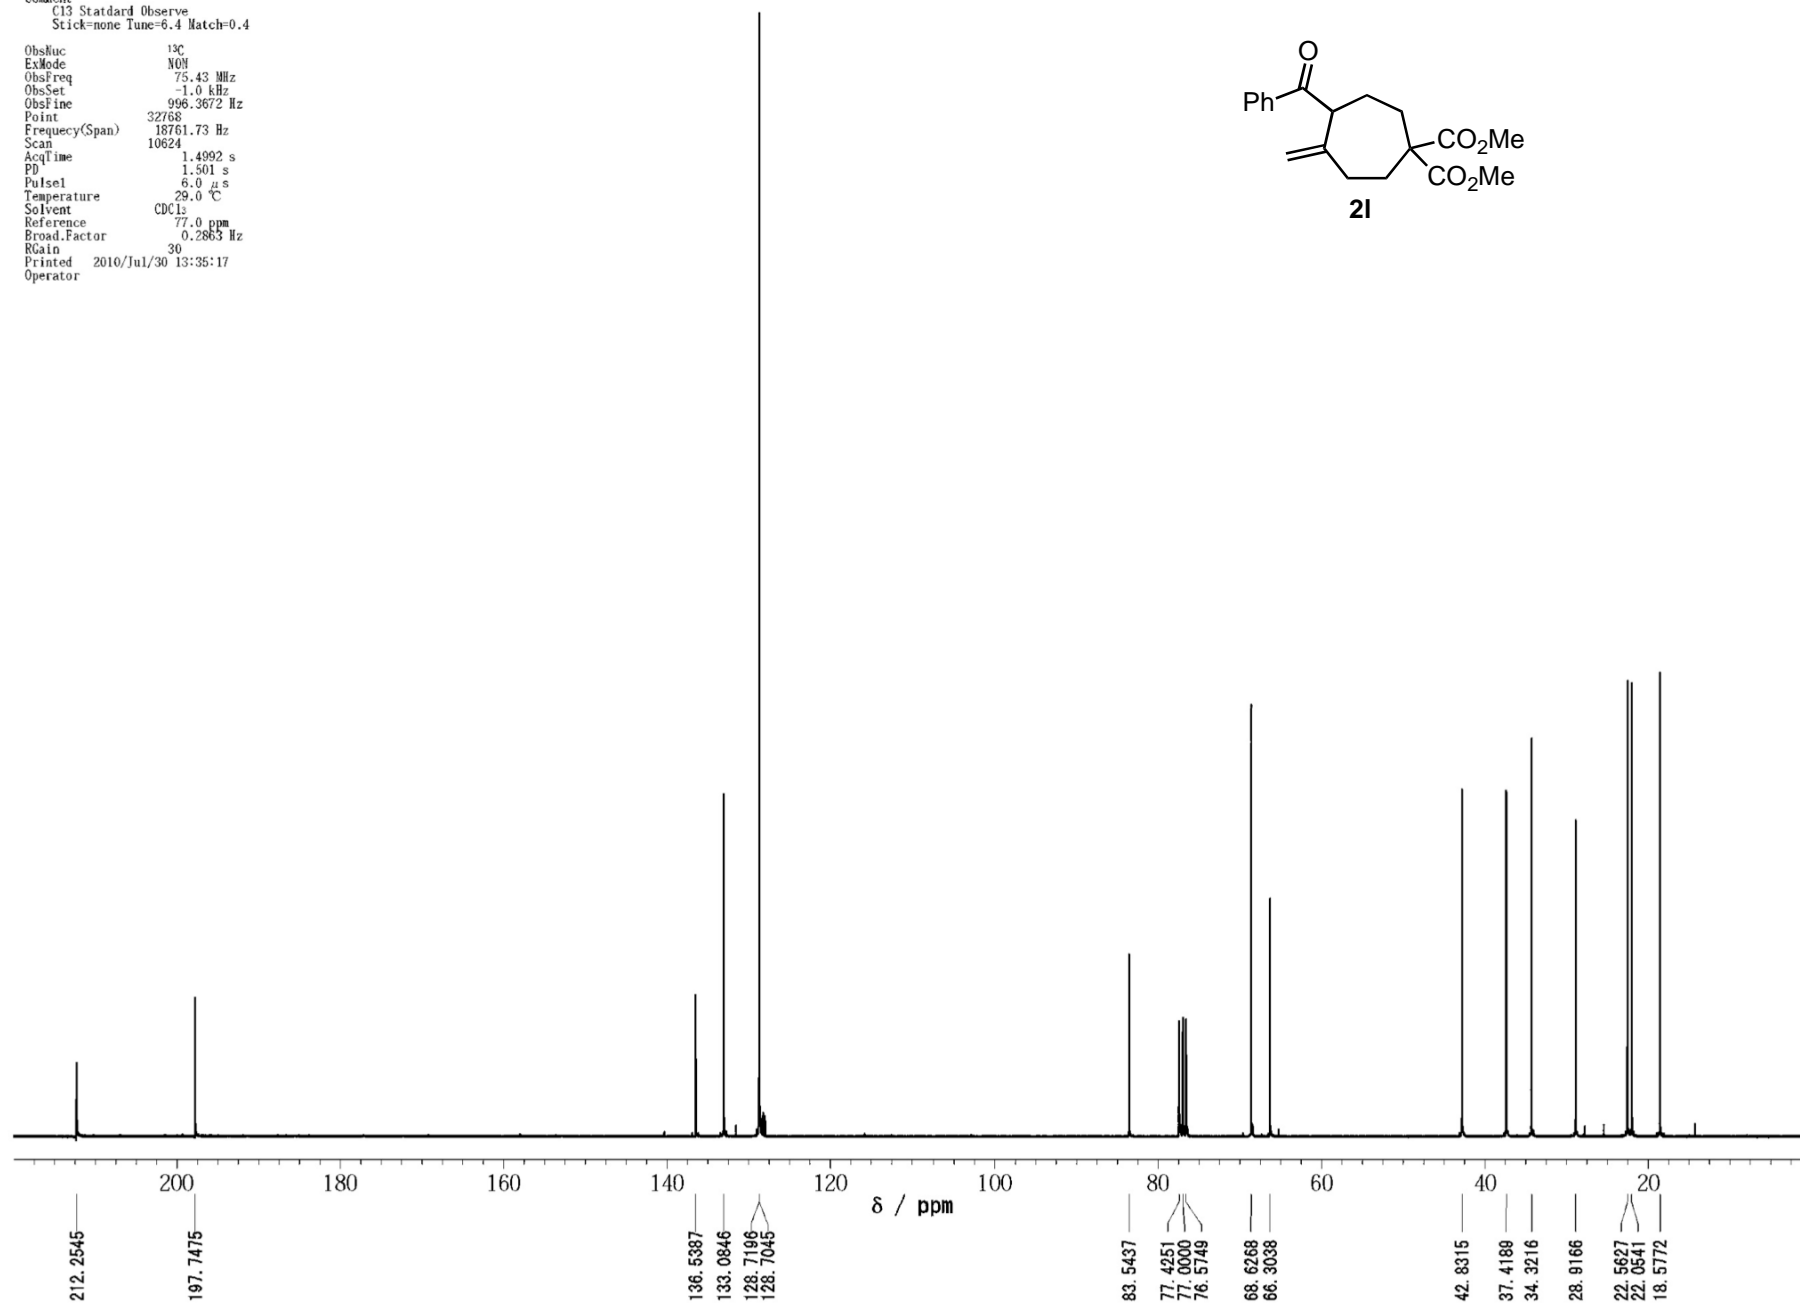

Original File:  
Date May 28 10  
Comment  
STANDARD 1H OBSERVE

ObsRuoc <sup>1</sup>H  
ExMode NMR  
ObsFreq 299.96 MHz  
ObsSet -1.0 kHz  
ObsFine 995.0047 Hz  
Point 16384  
Frequency(Span) 4500.45 Hz  
Scan 32  
AcqTime 3.4983 s  
PD 1.502 s  
Pulse1 6.0  $\mu$ s  
Temperature 29.0  $^{\circ}$ C  
Solvent CDCl<sub>3</sub>  
Reference 0.0 ppm  
Broad.Factor 0.1373 Hz  
RGain 8  
Printed 2010/Jul/30 13:57:56  
Operator

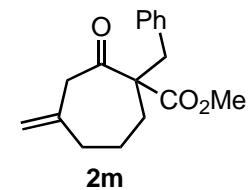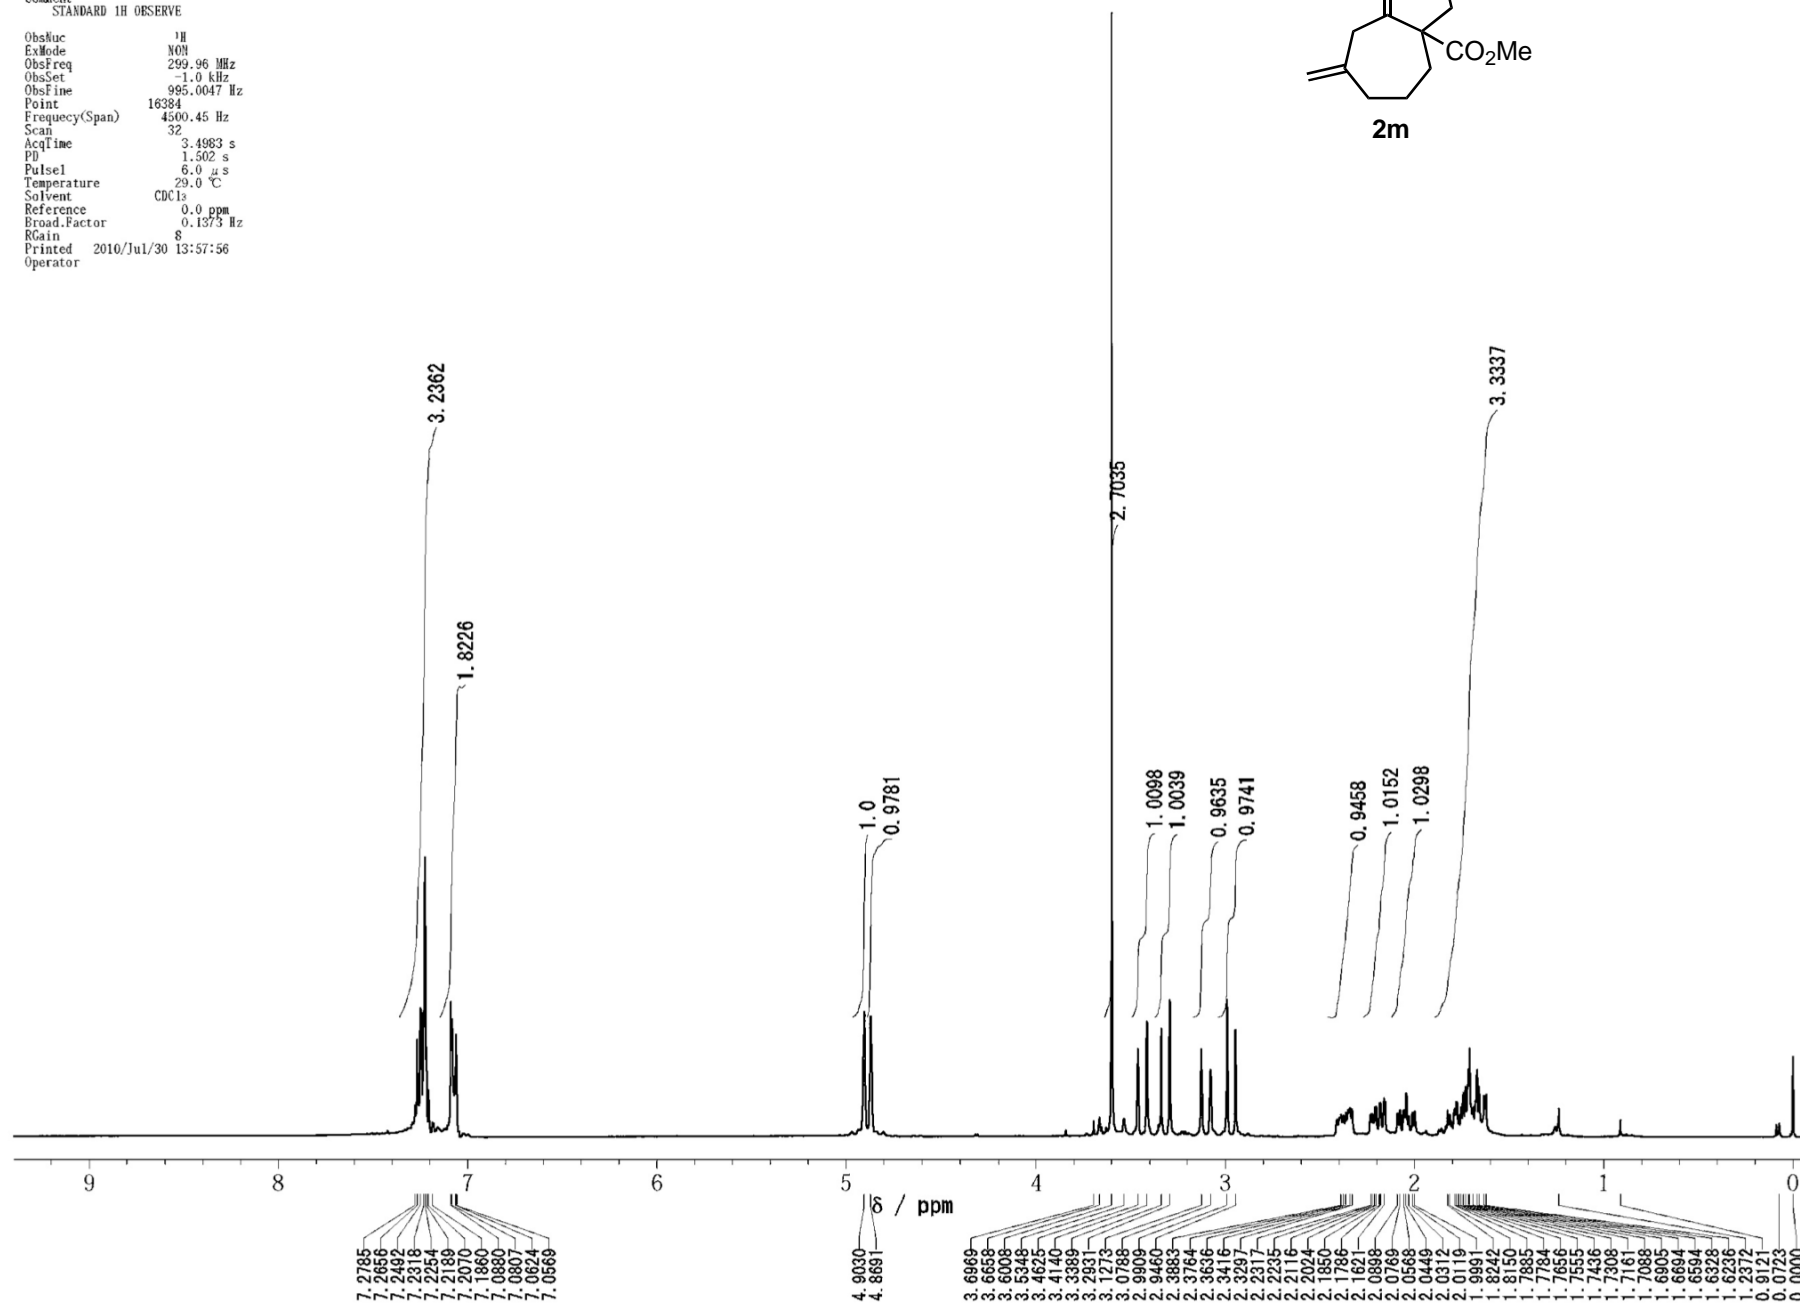

Original File:  
 Date May 28 10  
 Comment  
 C13 Standard Observe  
 Stick=none Tune=6.4 Match=0.4

ObsRuc 13C  
 ExMode NOM  
 ObsFreq 75.43 MHz  
 ObsSet -1.0 kHz  
 ObsFine 996.3672 Hz  
 Point 32768  
 Frequency(Span) 18761.73 Hz  
 Scan 10560  
 AcqTime 1.4992 s  
 PD 1.501 s  
 Pulse 6.0  $\mu$ s  
 Temperature 29.0  $^{\circ}$ C  
 Solvent CDCl<sub>3</sub>  
 Reference 77.0 ppm  
 Broad.Factor 0.2863 Hz  
 RGain 30  
 Printed 2010/Jul/30 13:59:04  
 Operator

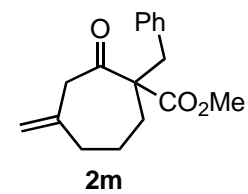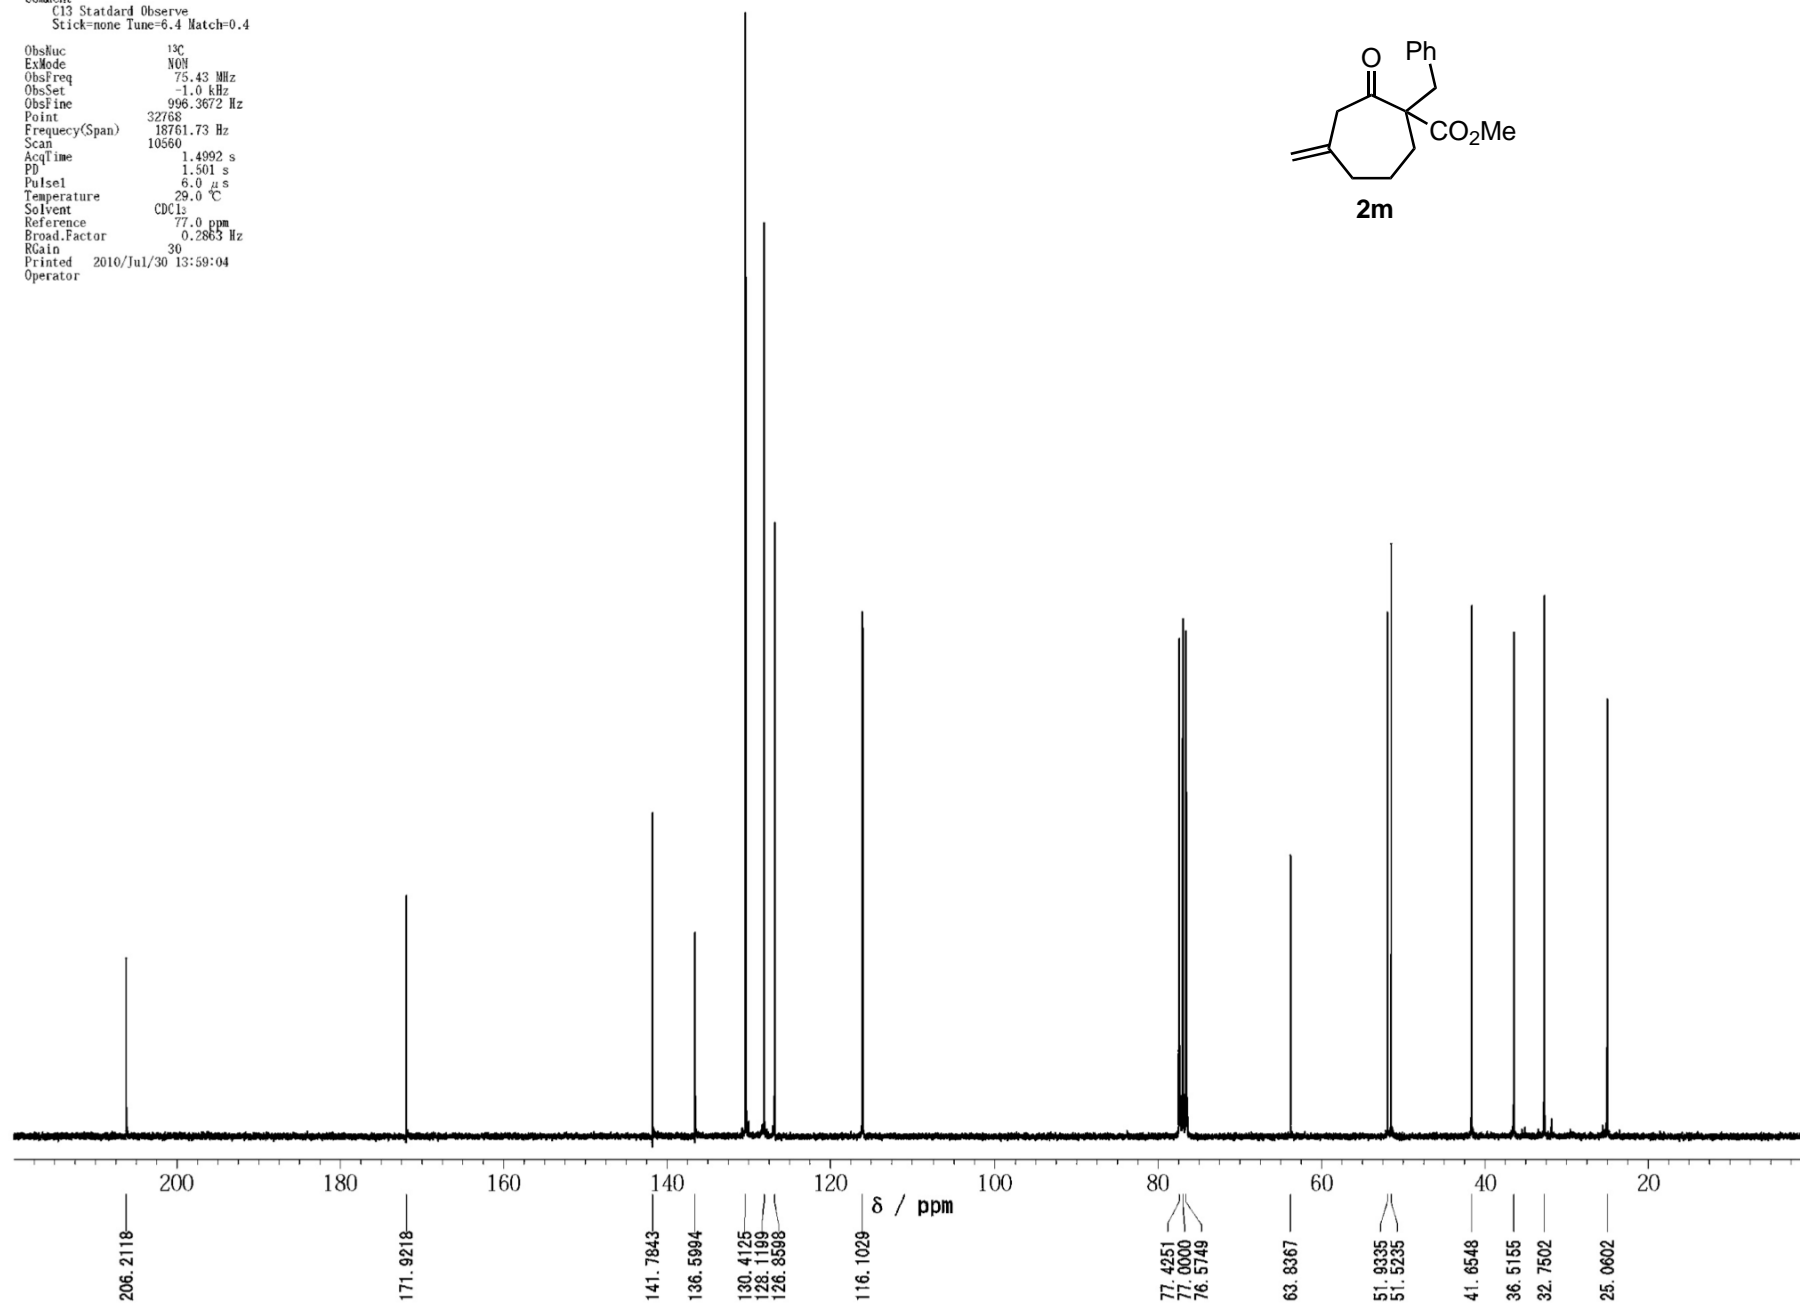

Original File: Jun 25 10  
 Date  
 Comment  
 STANDARD 1H OBSERVE  
 ObsRuoc <sup>1</sup>H  
 ExMode NMR  
 ObsFreq 299.96 MHz  
 ObsSet -1.0 kHz  
 ObsFine 995.0047 Hz  
 Point 16384  
 Frequency(Span) 4500.45 Hz  
 Scan 32  
 AcqTime 3.4983 s  
 PD 1.502 s  
 Pulse1 6.0  $\mu$ s  
 Temperature 29.0  $^{\circ}$ C  
 Solvent CDCl<sub>3</sub>  
 Reference 0.0 ppm  
 Broad.Factor 0.1373 Hz  
 RGain 12  
 Printed 2010/Jul/30 14:05:52  
 Operator

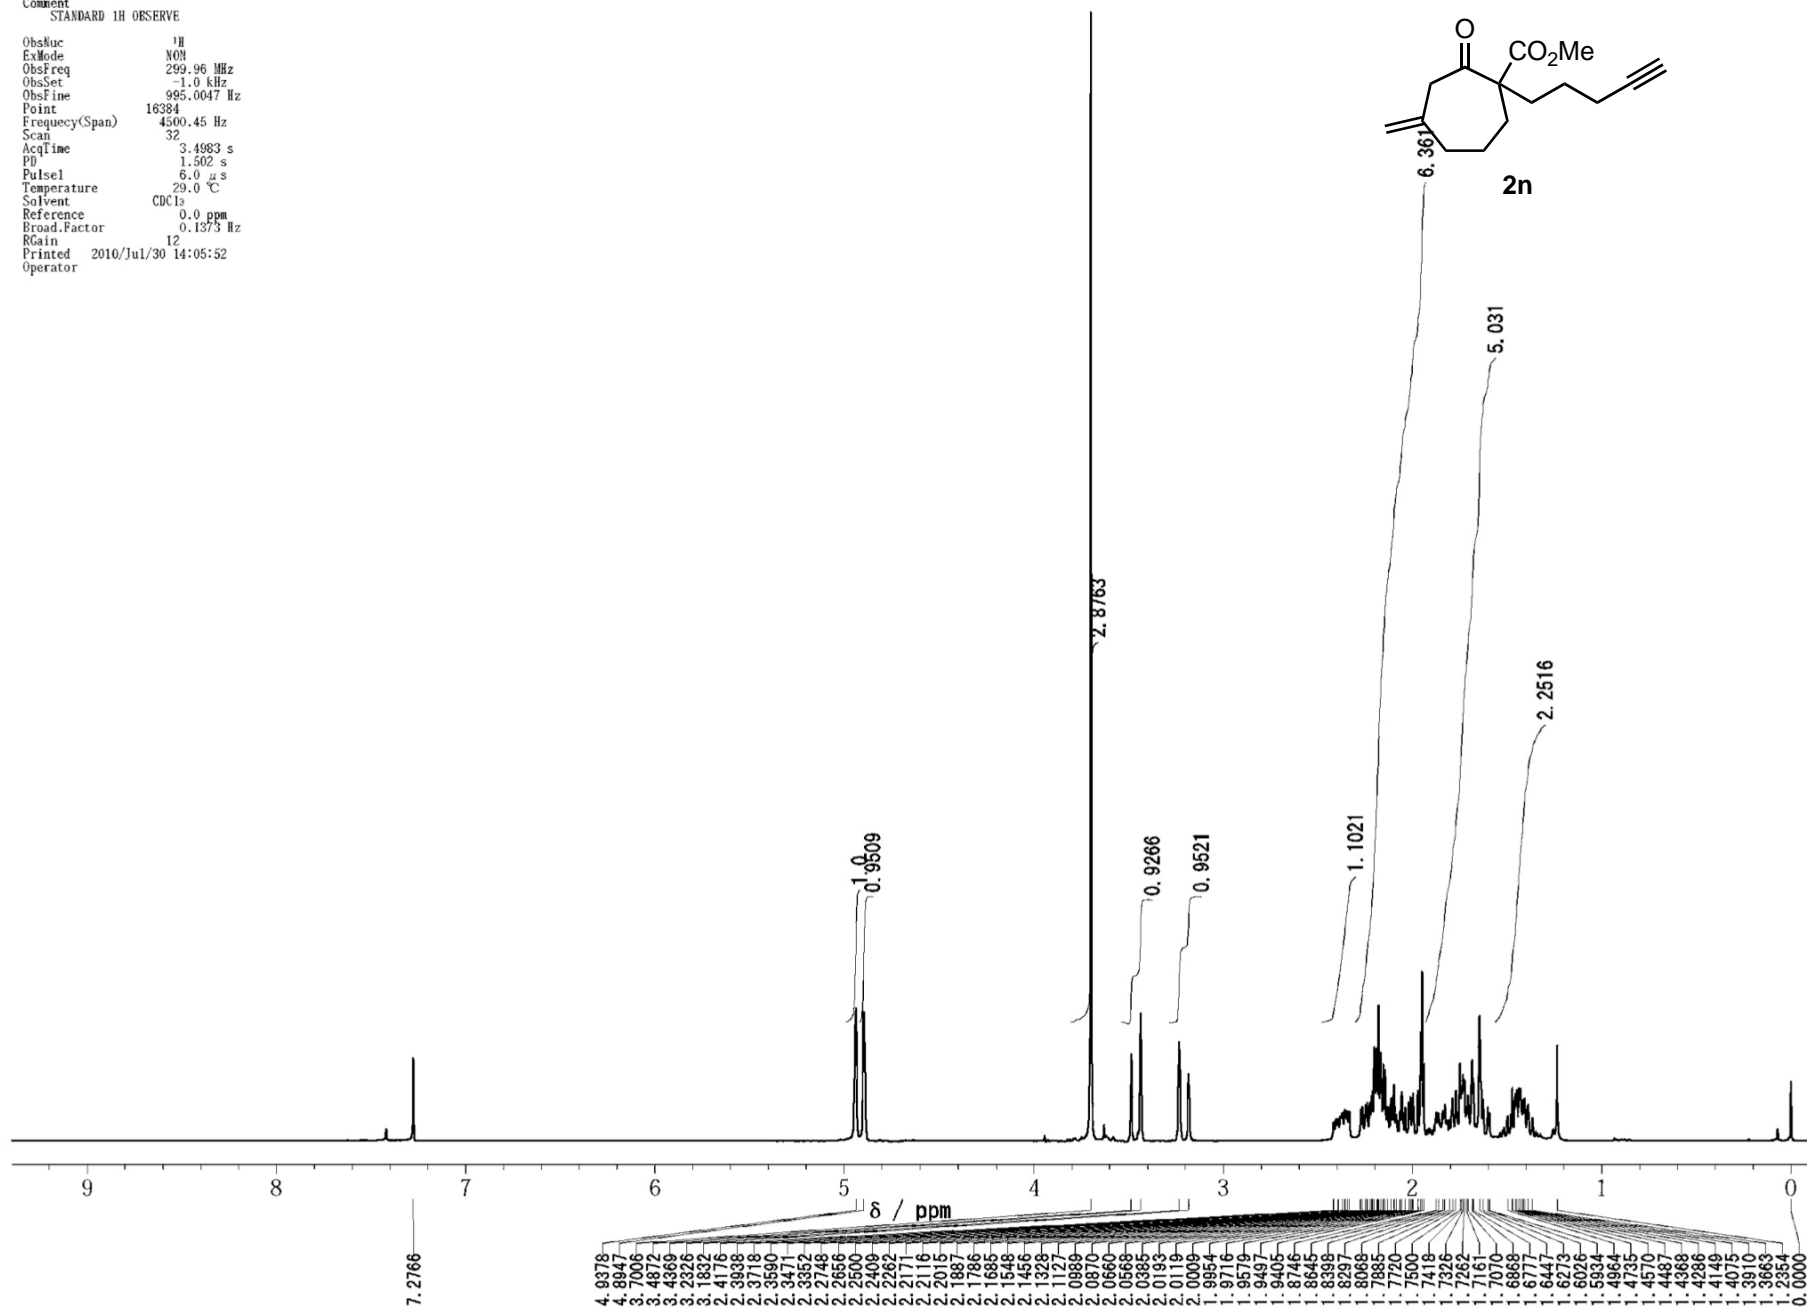

|                 |                      |
|-----------------|----------------------|
| ObsSfuc         | 13C                  |
| ExMode          | NON                  |
| ObsFreq         | 75.43 MHz            |
| ObsSet          | -1.0 kHz             |
| ObsLine         | 996.3672 Hz          |
| Point           | 32768                |
| Frequency(Span) | 18761.73 Hz          |
| Scan            | 9984                 |
| AcqTime         | 1.4992 s             |
| PD              | 1.501 s              |
| Pulse1          | 6.0 $\mu$ s          |
| Temperature     | 29.0 $^{\circ}$ C    |
| Solvent         | CDCl <sub>3</sub>    |
| Reference       | 77.0 ppm             |
| Broad.Factor    | 0.2863 Hz            |
| RGain           | 30                   |
| Printed         | 2010/Jul/30 14:07:39 |
| Operator        |                      |

C#CCCC1(C(=O)OC)CCCCC1=C

**2n**

Original File: Jun 28 10  
 Date  
 Comment  
 STANDARD 1H OBSERVE  
 ObsRuoc <sup>1</sup>H  
 ExMode NMR  
 ObsFreq 299.96 MHz  
 ObsSet -1.0 kHz  
 ObsFine 995.0047 Hz  
 Point 16384  
 Frequency(Span) 4500.45 Hz  
 Scan 16  
 AcqTime 3.4983 s  
 PD 1.502 s  
 Pulse1 6.0  $\mu$ s  
 Temperature 29.0  $^{\circ}$ C  
 Solvent CDCl<sub>3</sub>  
 Reference 0.0 ppm  
 Broad.Factor 0.1373 Hz  
 RGain 24  
 Printed 2010/Jul/29 20:59:17  
 Operator

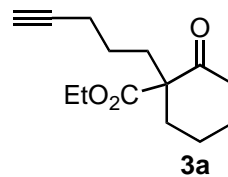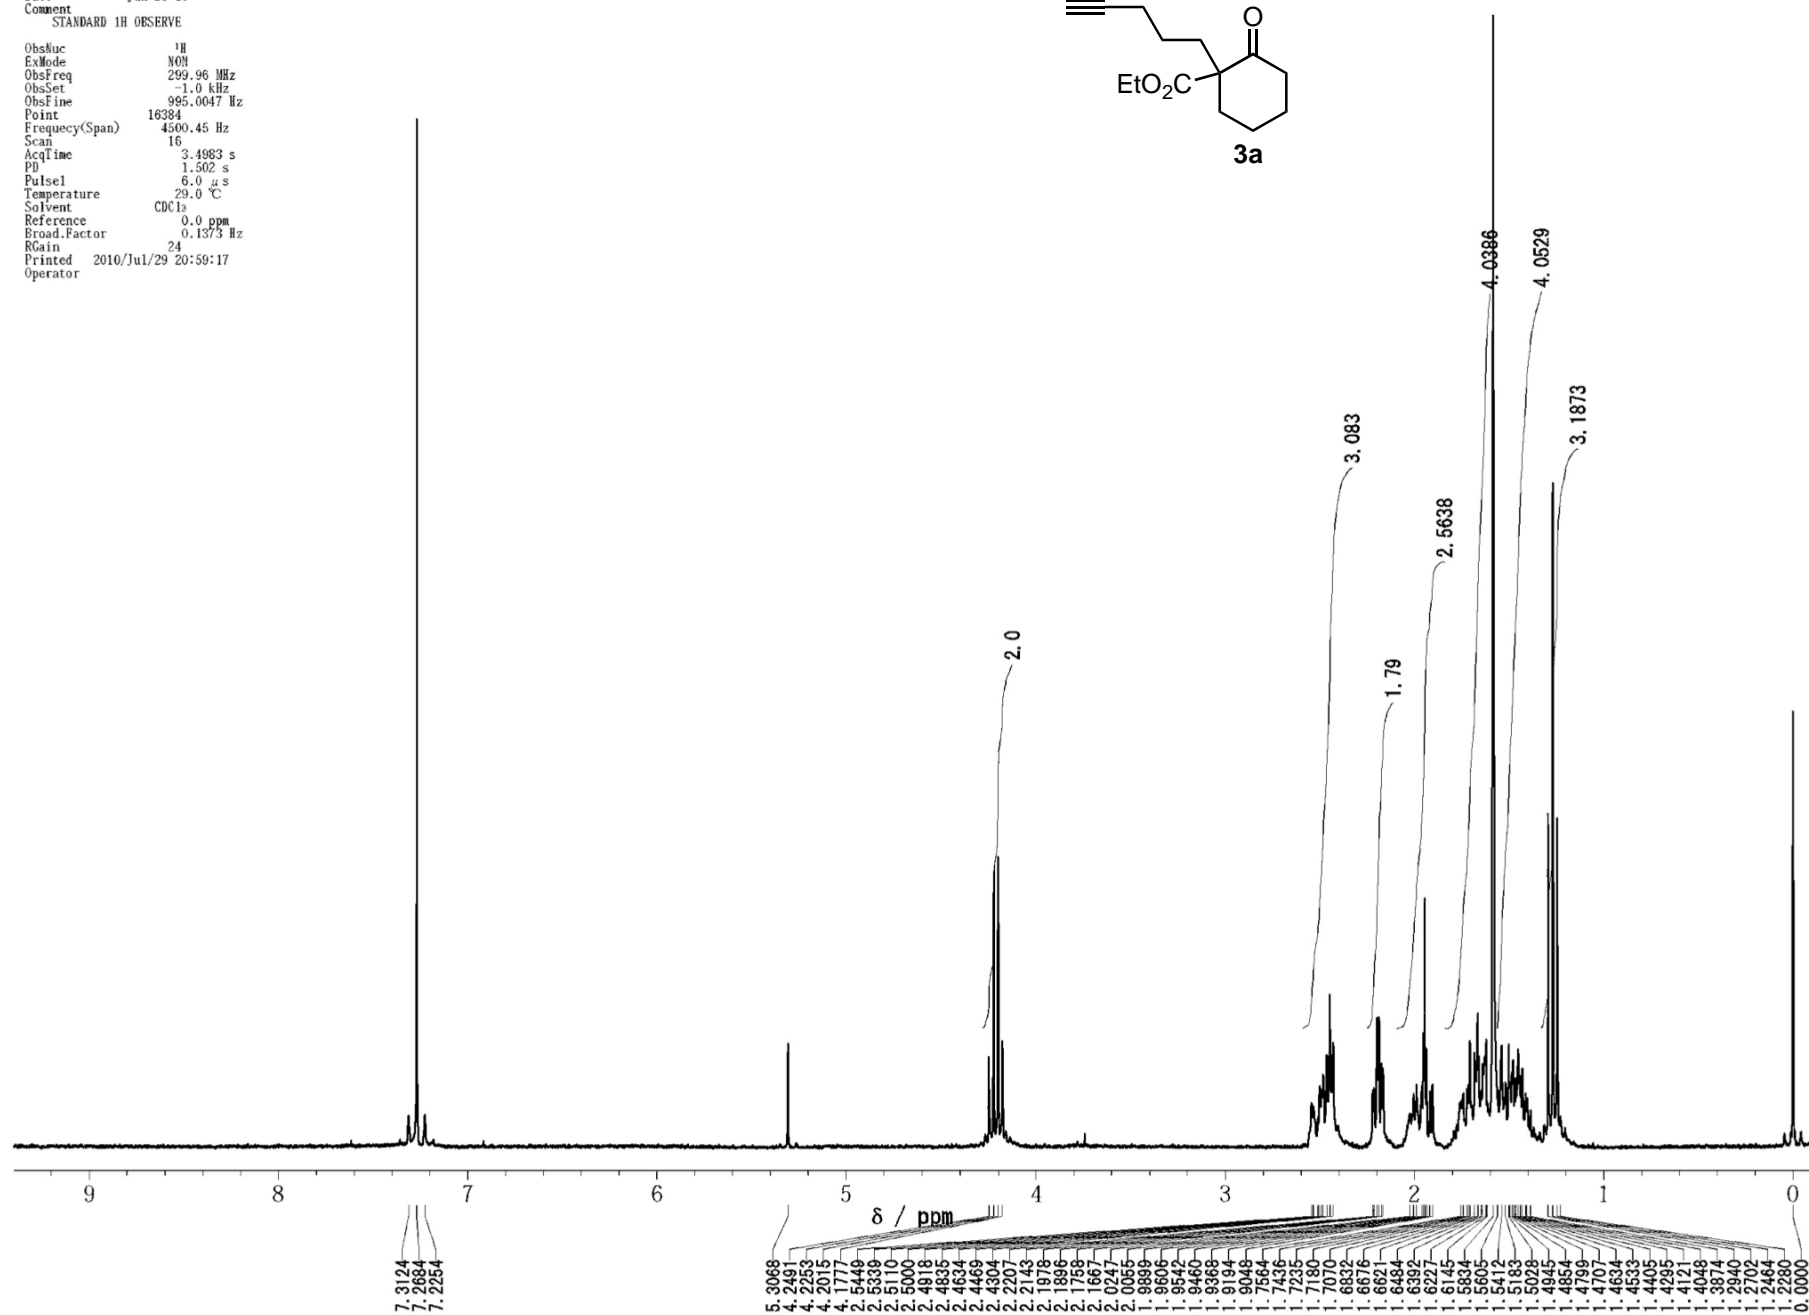



Original File:  
 Date Jun 28 10  
 Comment  
 C13 Statdard Observe  
 Stick=none Tune=6.4 Match=0.4

Obskuc <sup>13</sup>C  
 ExMode NOM  
 ObsFreq 75.43 MHz  
 ObsSet -1.0 kHz  
 ObsFine 996.3672 Hz  
 Point 32768  
 Frequency(Span) 18761.73 Hz  
 Scan 56  
 AcqTime 1.4992 s  
 PD 1.501 s  
 Pulse 6.0 μs  
 Temperature 29.0 °C  
 Solvent CDCl<sub>3</sub>  
 Reference 77.0 ppm  
 Broad.Factor 0.2863 Hz  
 RGain 30  
 Printed 2010/Jul/29 20:57:53  
 Operator

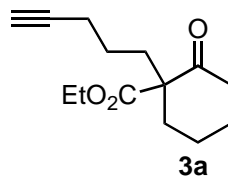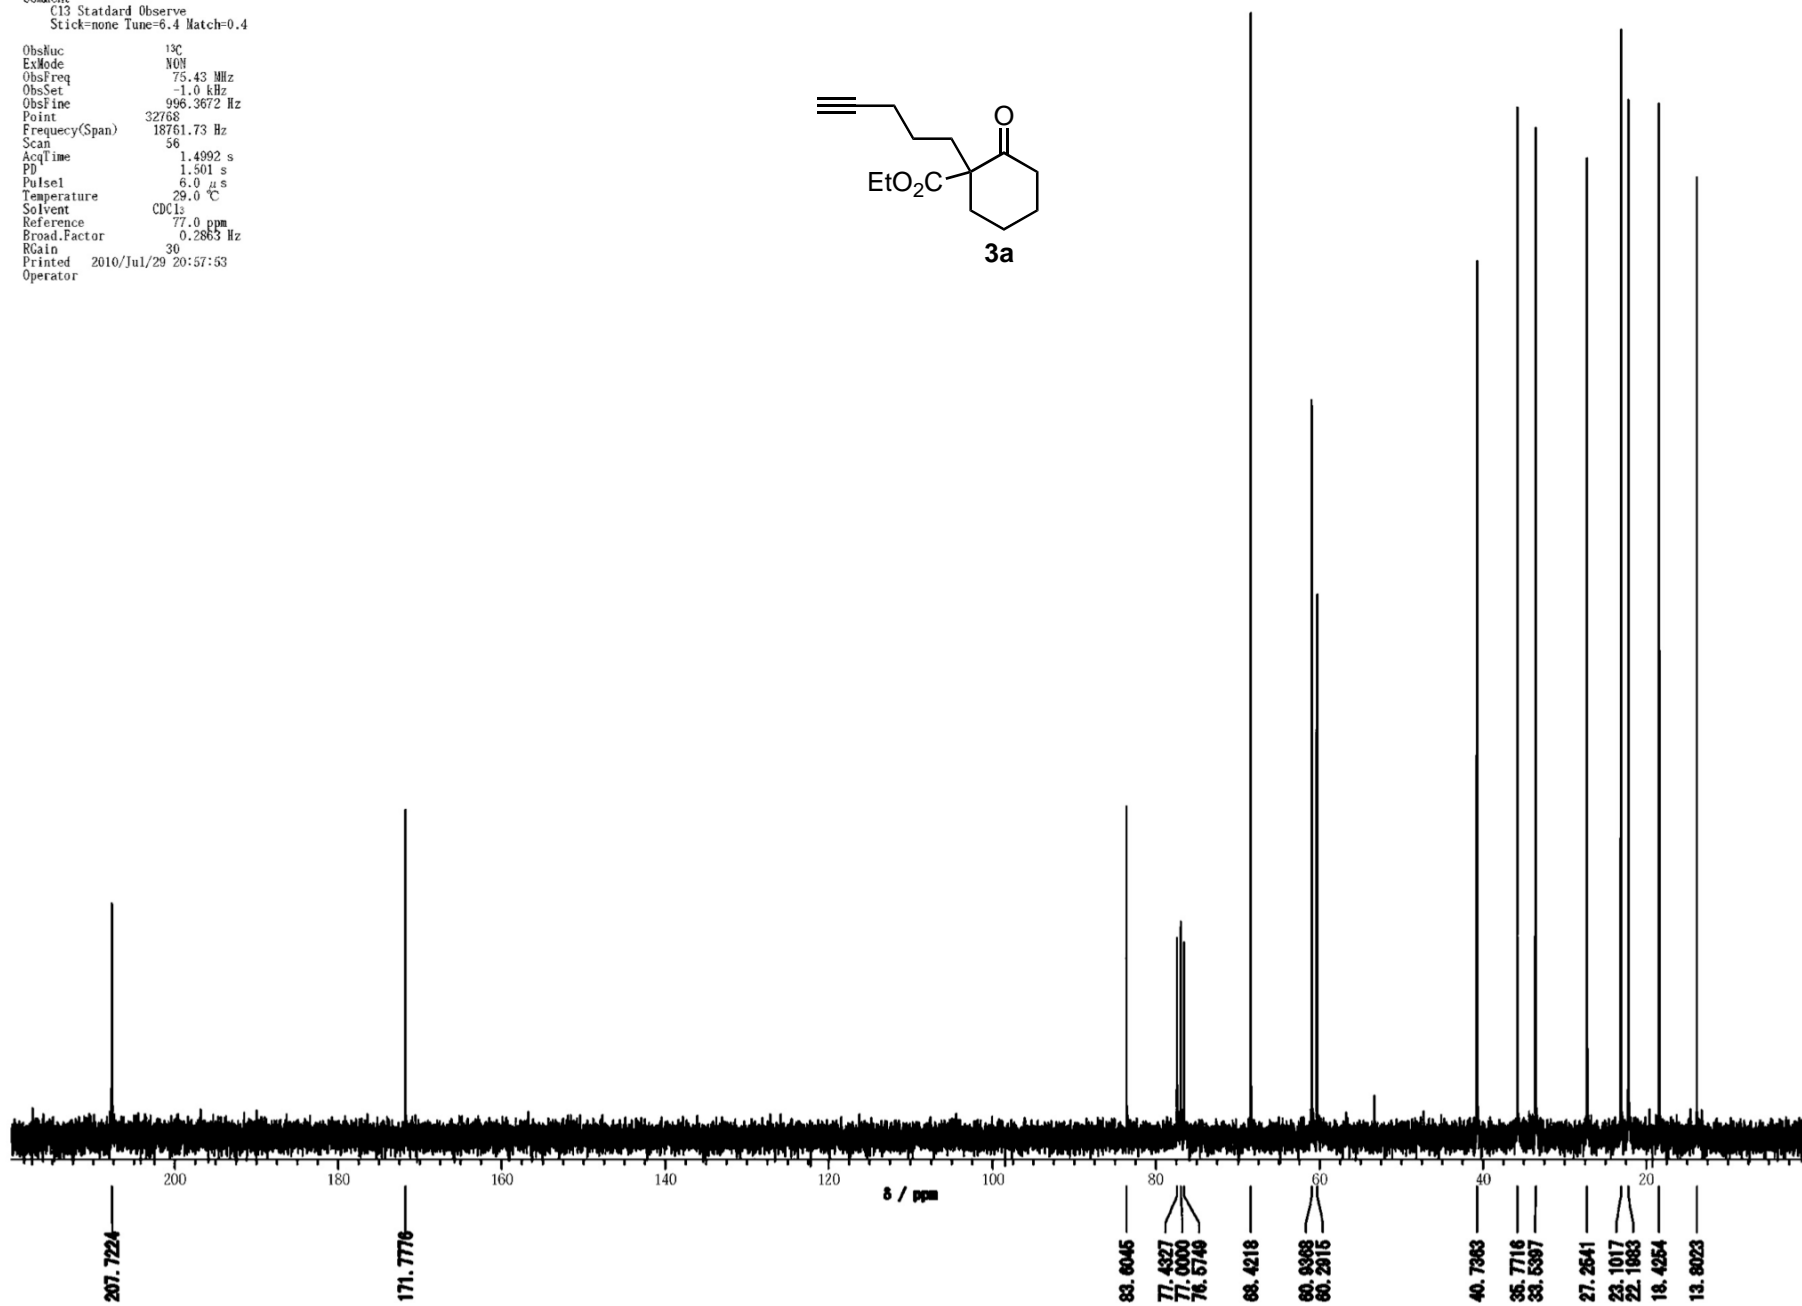

Original File:  
Date Jun 15 10  
Comment  
STANDARD 1H OBSERVE

ObsRuoc 1H  
ExMode NMR  
ObsFreq 299.96 MHz  
ObsSet -1.0 kHz  
ObsFine 995.0047 Hz  
Point 16384  
Frequency(Span) 4500.45 Hz  
Scan 96  
AcqTime 3.4983 s  
PD 1.502 s  
Pulse1 6.0  $\mu$ s  
Temperature 29.0  $^{\circ}$ C  
Solvent CDCl<sub>3</sub>  
Reference 0.0 ppm  
Broad.Factor 0.1373 Hz  
RGain 19  
Printed 2010/Jul/29 21:11:36  
Operator

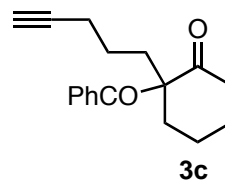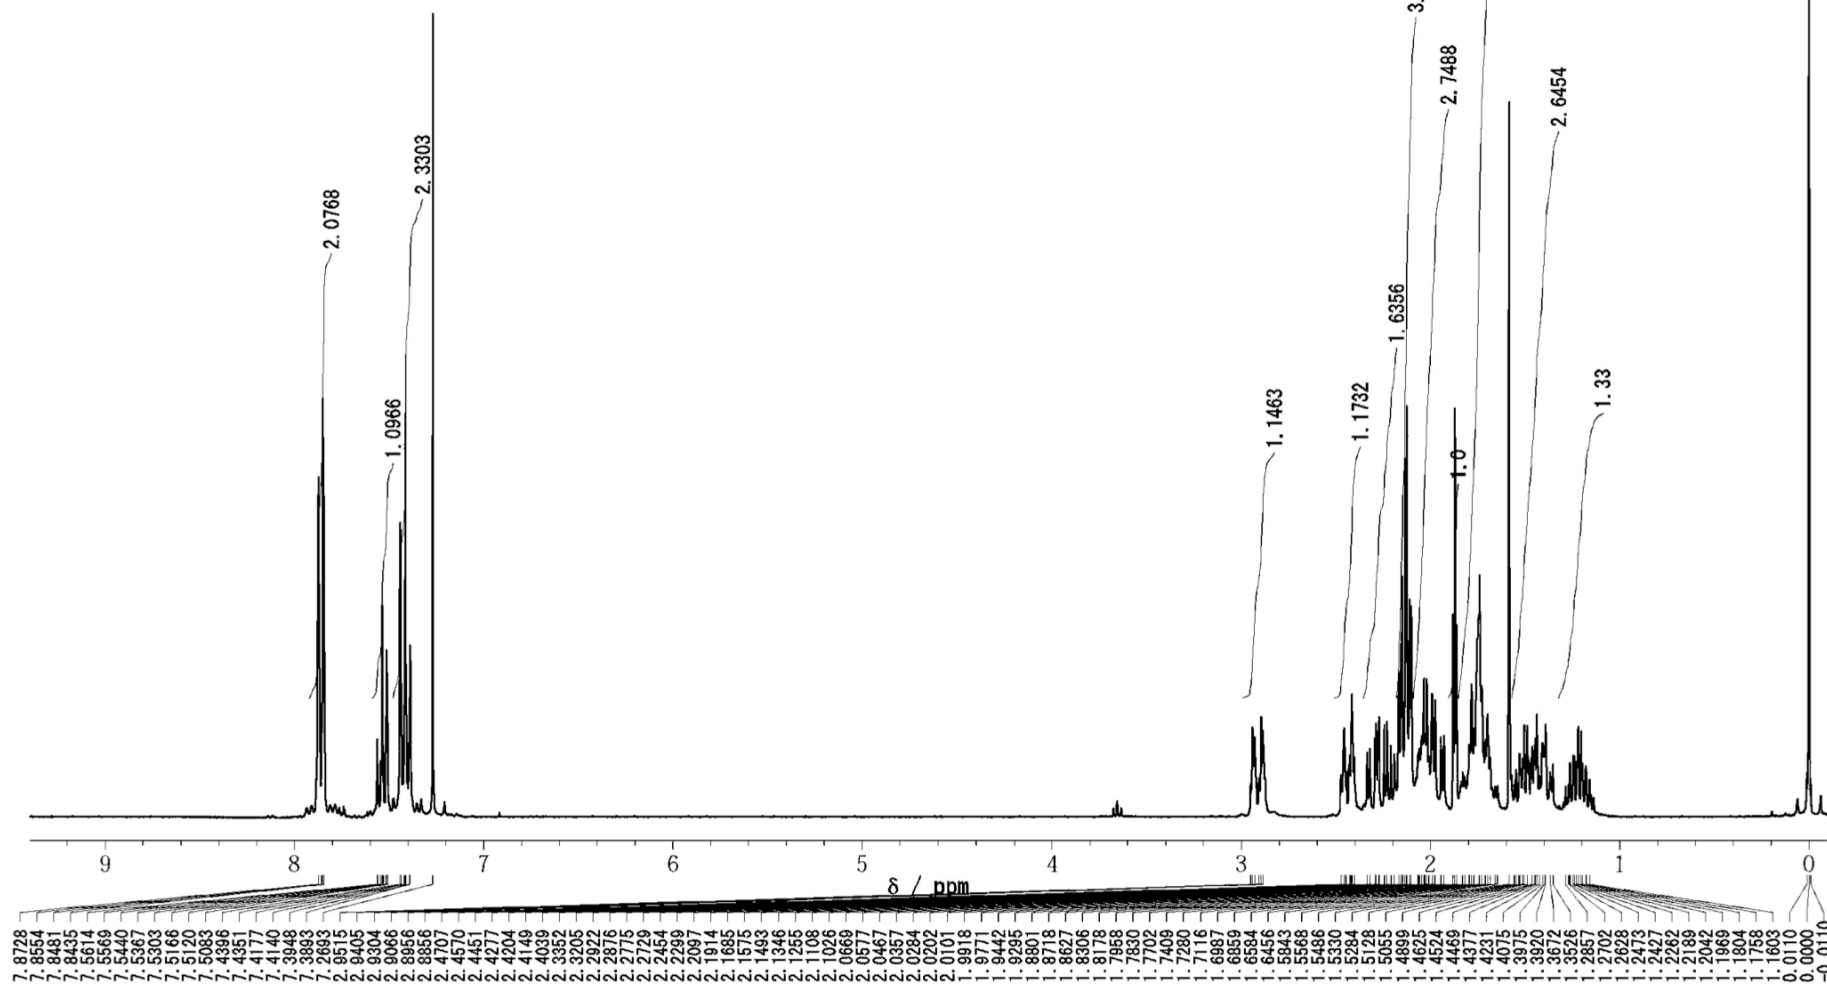

Original File:  
 Date Jun 15 10  
 Comment  
 C13 Standard Observe  
 Stick=none Tune=6.4 Match=0.4

ObsRuc 13C  
 ExMode NOM  
 ObsFreq 75.43 MHz  
 ObsSet -1.0 kHz  
 ObsFine 996.3672 Hz  
 Point 32768  
 Frequency(Span) 18761.73 Hz  
 Scan 10624  
 AcqTime 1.4992 s  
 PD 1.501 s  
 Pulse1 6.0  $\mu$ s  
 Temperature 29.0  $^{\circ}$ C  
 Solvent CDCl<sub>3</sub>  
 Reference 77.0 ppm  
 Broad.Factor 0.2863 Hz  
 RGain 30  
 Printed 2010/Jul/29 21:13:51  
 Operator

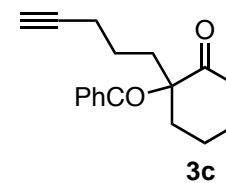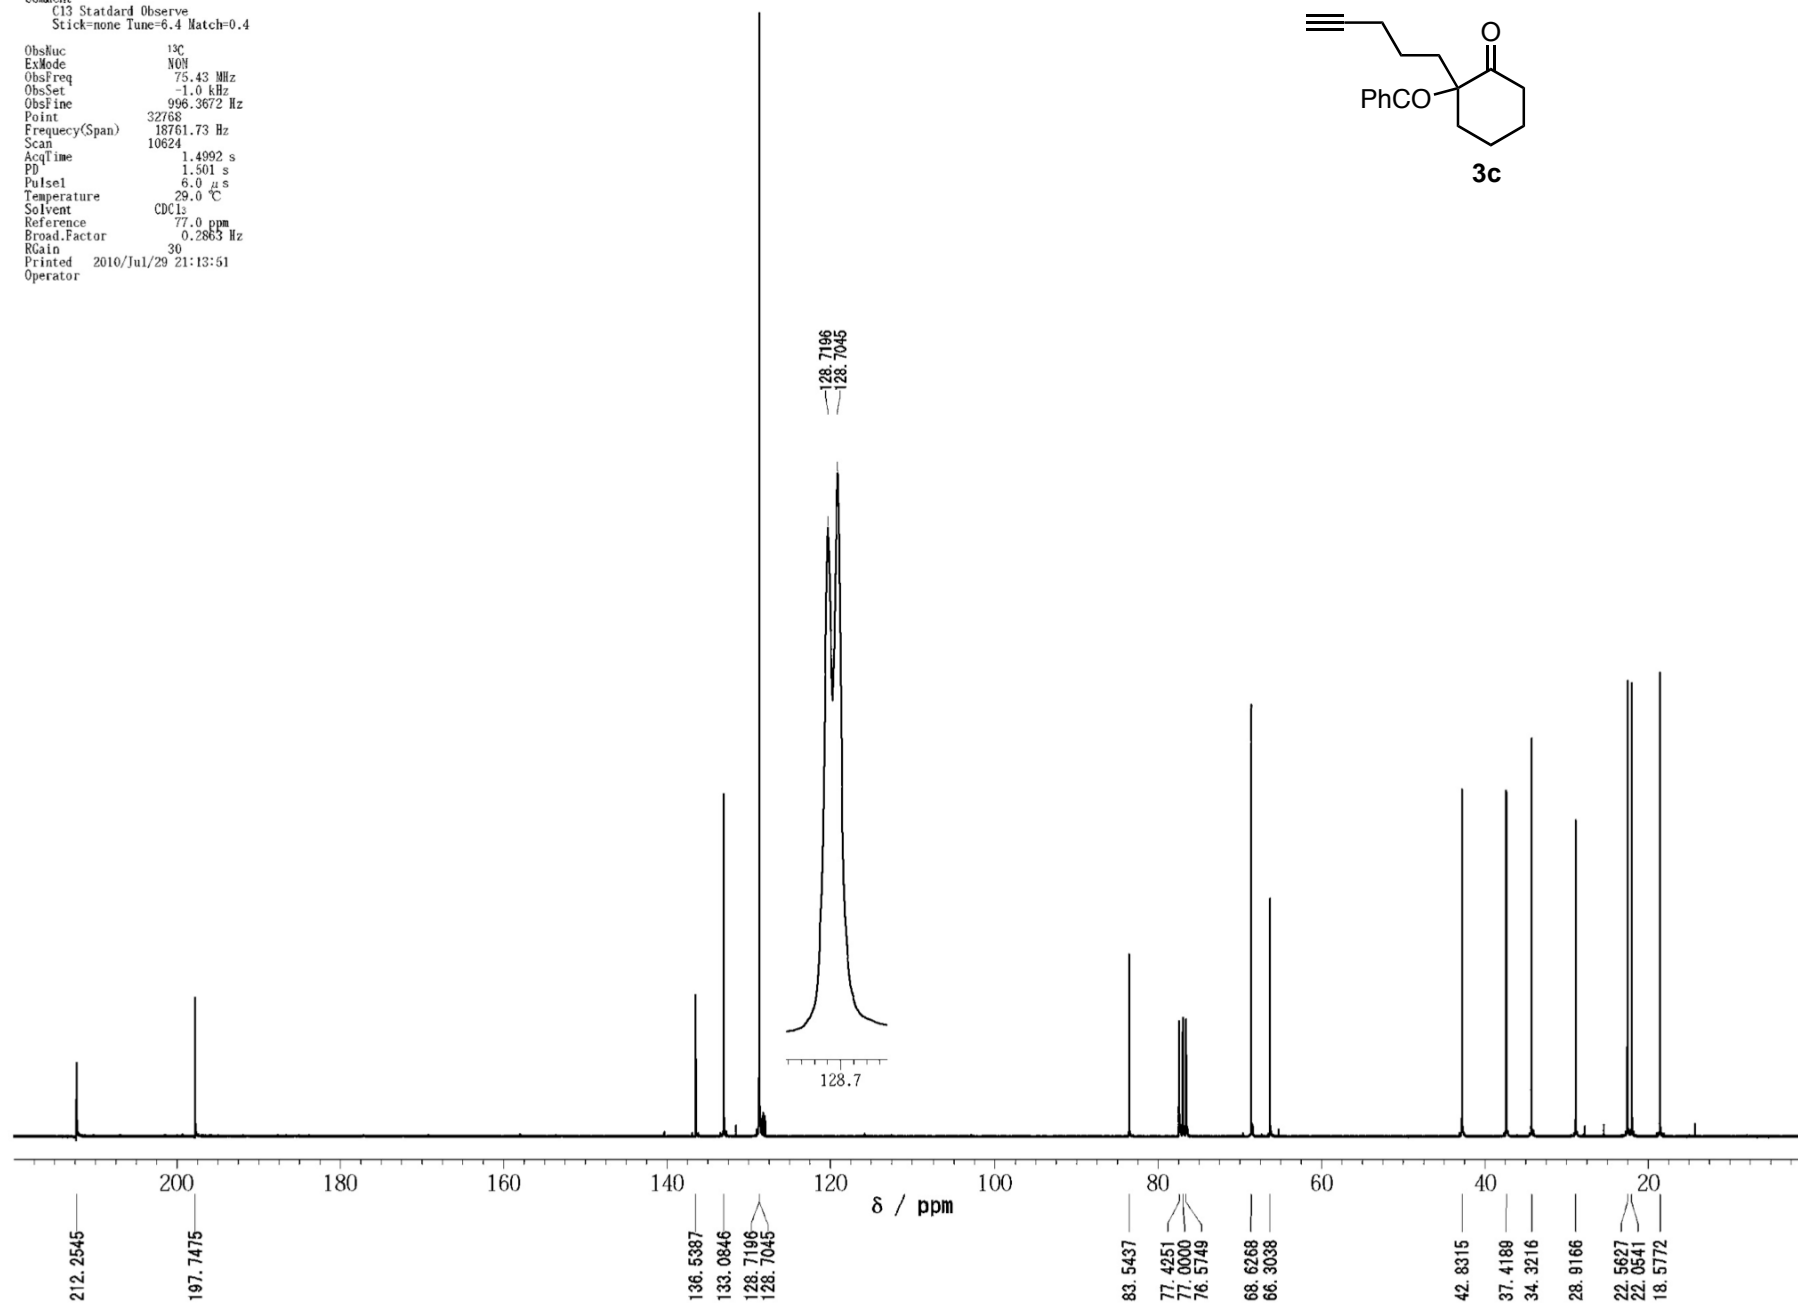

Original File: Oct 2 09  
 Date  
 Comment  
 STANDARD 1H OBSERVE  
 ObsRuoc 1H  
 ExMode NMR  
 ObsFreq 299.96 MHz  
 ObsSet -1.0 kHz  
 ObsFine 995.0047 Hz  
 Point 16384  
 Frequency(Span) 4500.45 Hz  
 Scan 16  
 AcqTime 3.4983 s  
 PD 1.502 s  
 Pulse1 6.0  $\mu$ s  
 Temperature 29.0  $^{\circ}$ C  
 Solvent CDCl<sub>3</sub>  
 Reference 0.0 ppm  
 Broad.Factor 0.1373 Hz  
 RGain 24  
 Printed 2010/Jul/29 21:34:51  
 Operator

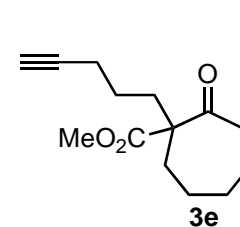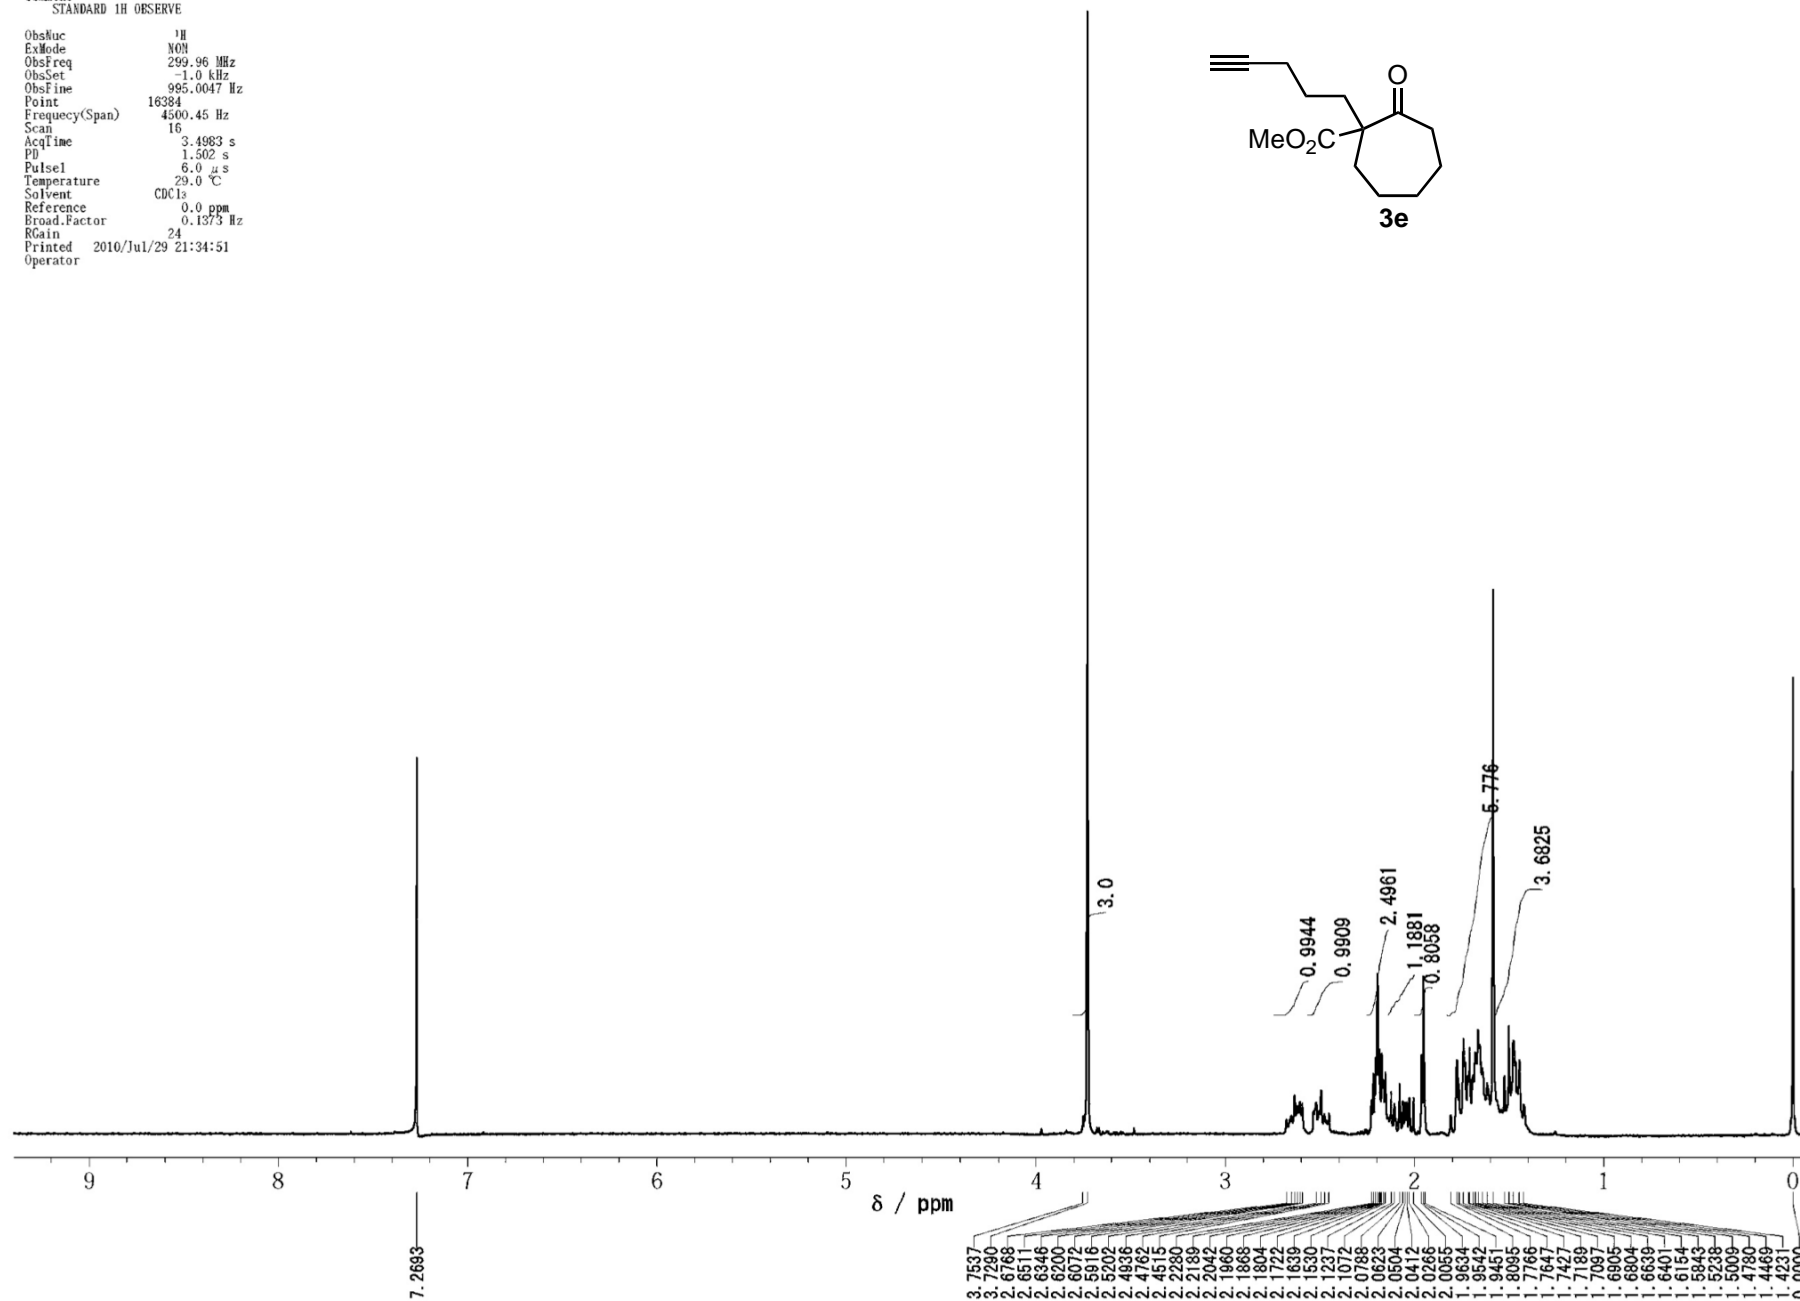

Original File:  
 Date Oct 2 09  
 Comment C13 Standard Observe  
 Stick=none Tune=6.4 Match=0.4

ObsRoc 13C  
 ExMode NOM  
 ObsFreq 75.43 MHz  
 ObsSet -1.0 kHz  
 ObsFine 996.3672 Hz  
 Point 32768  
 Frequency(Span) 18761.73 Hz  
 Scan 256  
 AcqTime 1.4992 s  
 PD 1.501 s  
 Pulse1 6.0  $\mu$ s  
 Temperature 29.0  $^{\circ}$ C  
 Solvent CDCl<sub>3</sub>  
 Reference 77.0 ppm  
 Broad.Factor 0.2863 Hz  
 RGain 30  
 Printed 2010/Jul/29 21:36:16  
 Operator

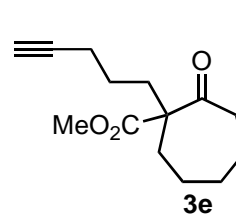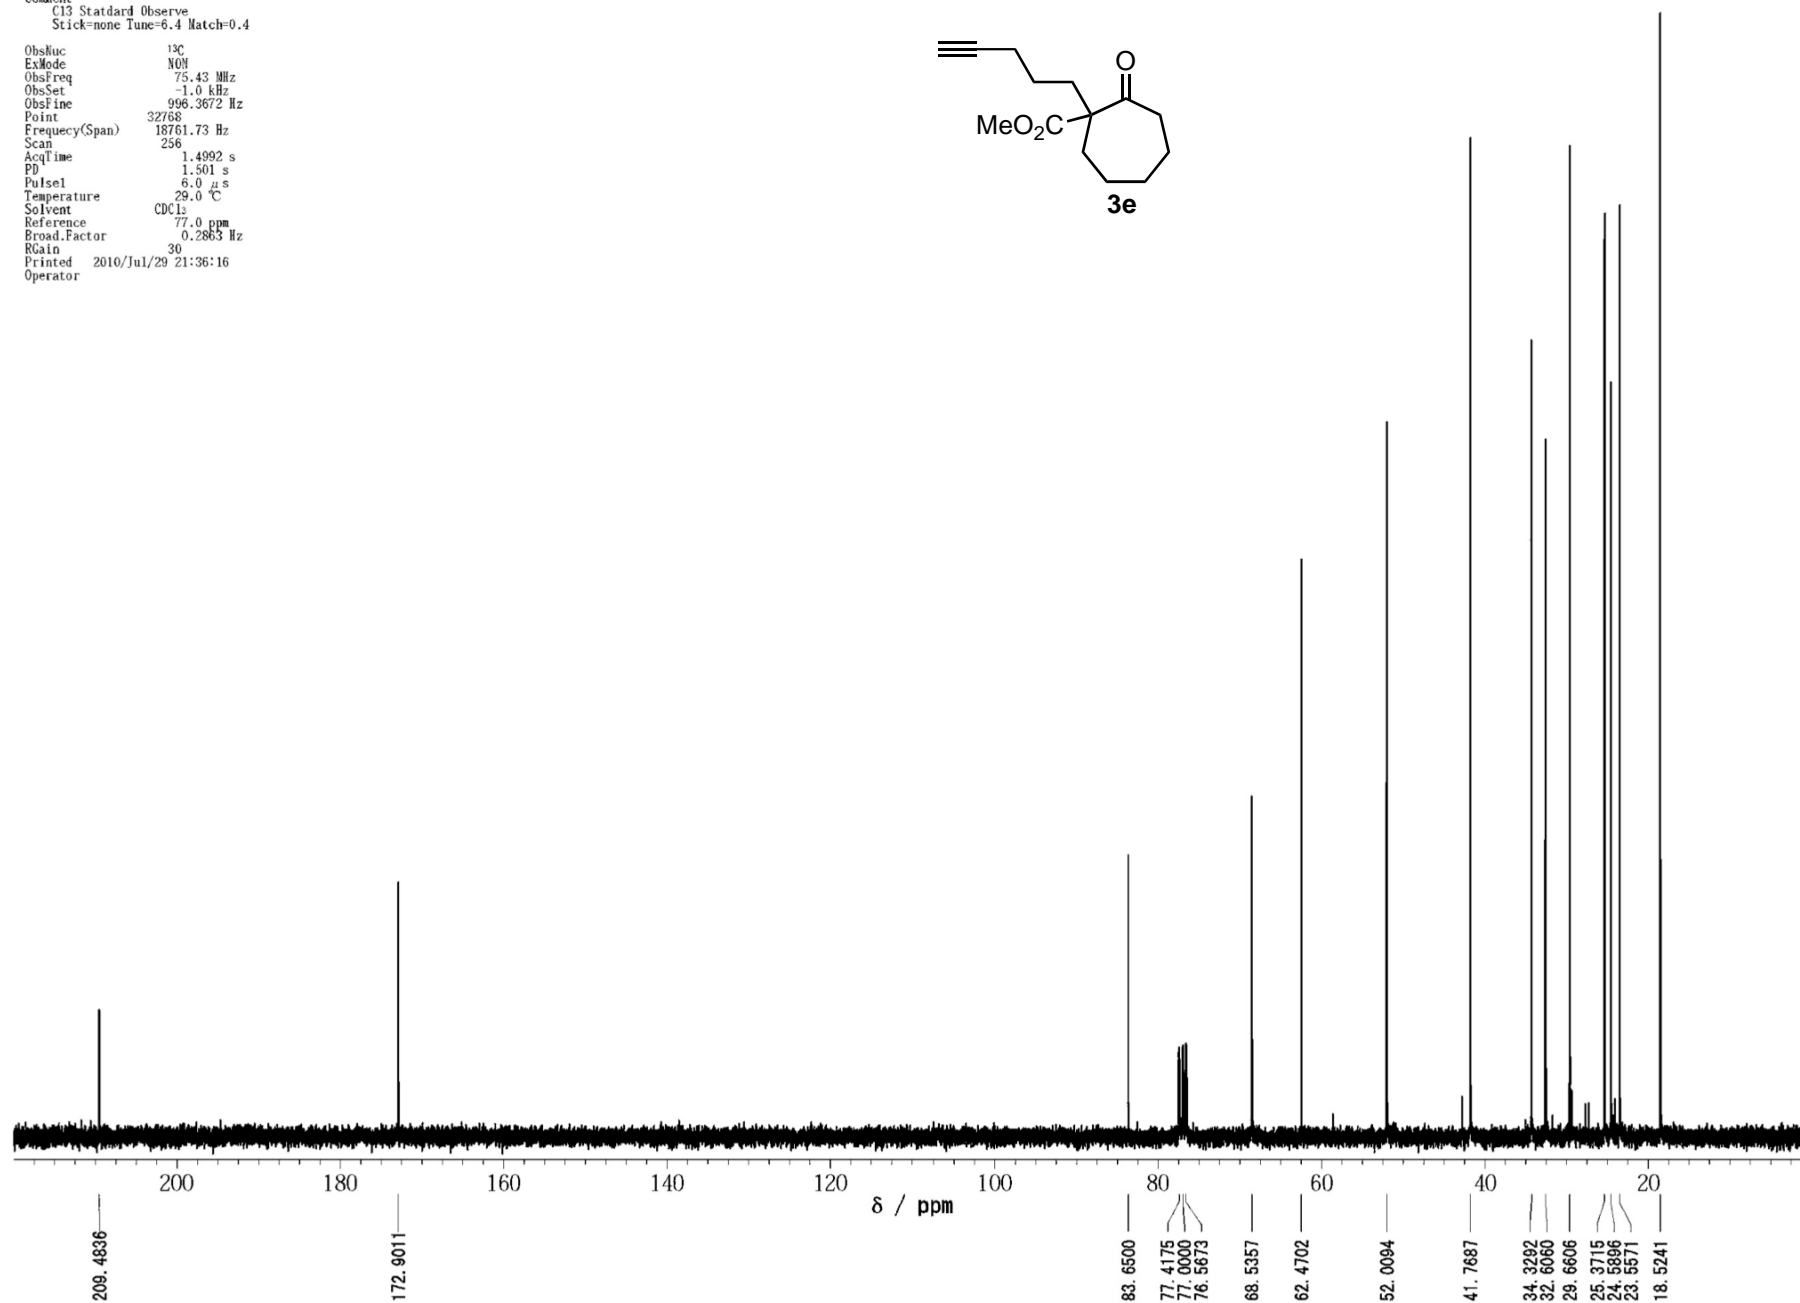

Original File:  
 Date Jul 23 10  
 Comment  
 STANDARD 1H OBSERVE  
 ObsRuoc <sup>1</sup>H  
 ExMode NMR  
 ObsFreq 299.96 MHz  
 ObsSet -1.0 kHz  
 ObsFine 995.0047 Hz  
 Point 16384  
 Frequency(Span) 4500.45 Hz  
 Scan 32  
 AcqTime 3.4983 s  
 PD 1.502 s  
 Pulse1 6.0  $\mu$ s  
 Temperature 29.0  $^{\circ}$ C  
 Solvent CDCl<sub>3</sub>  
 Reference 0.0 ppm  
 Broad.Factor 0.1373 Hz  
 RGain 24  
 Printed 2010/Jul/29 21:43:47  
 Operator

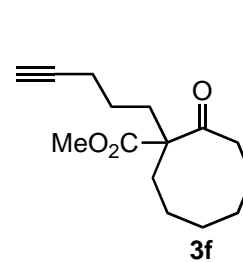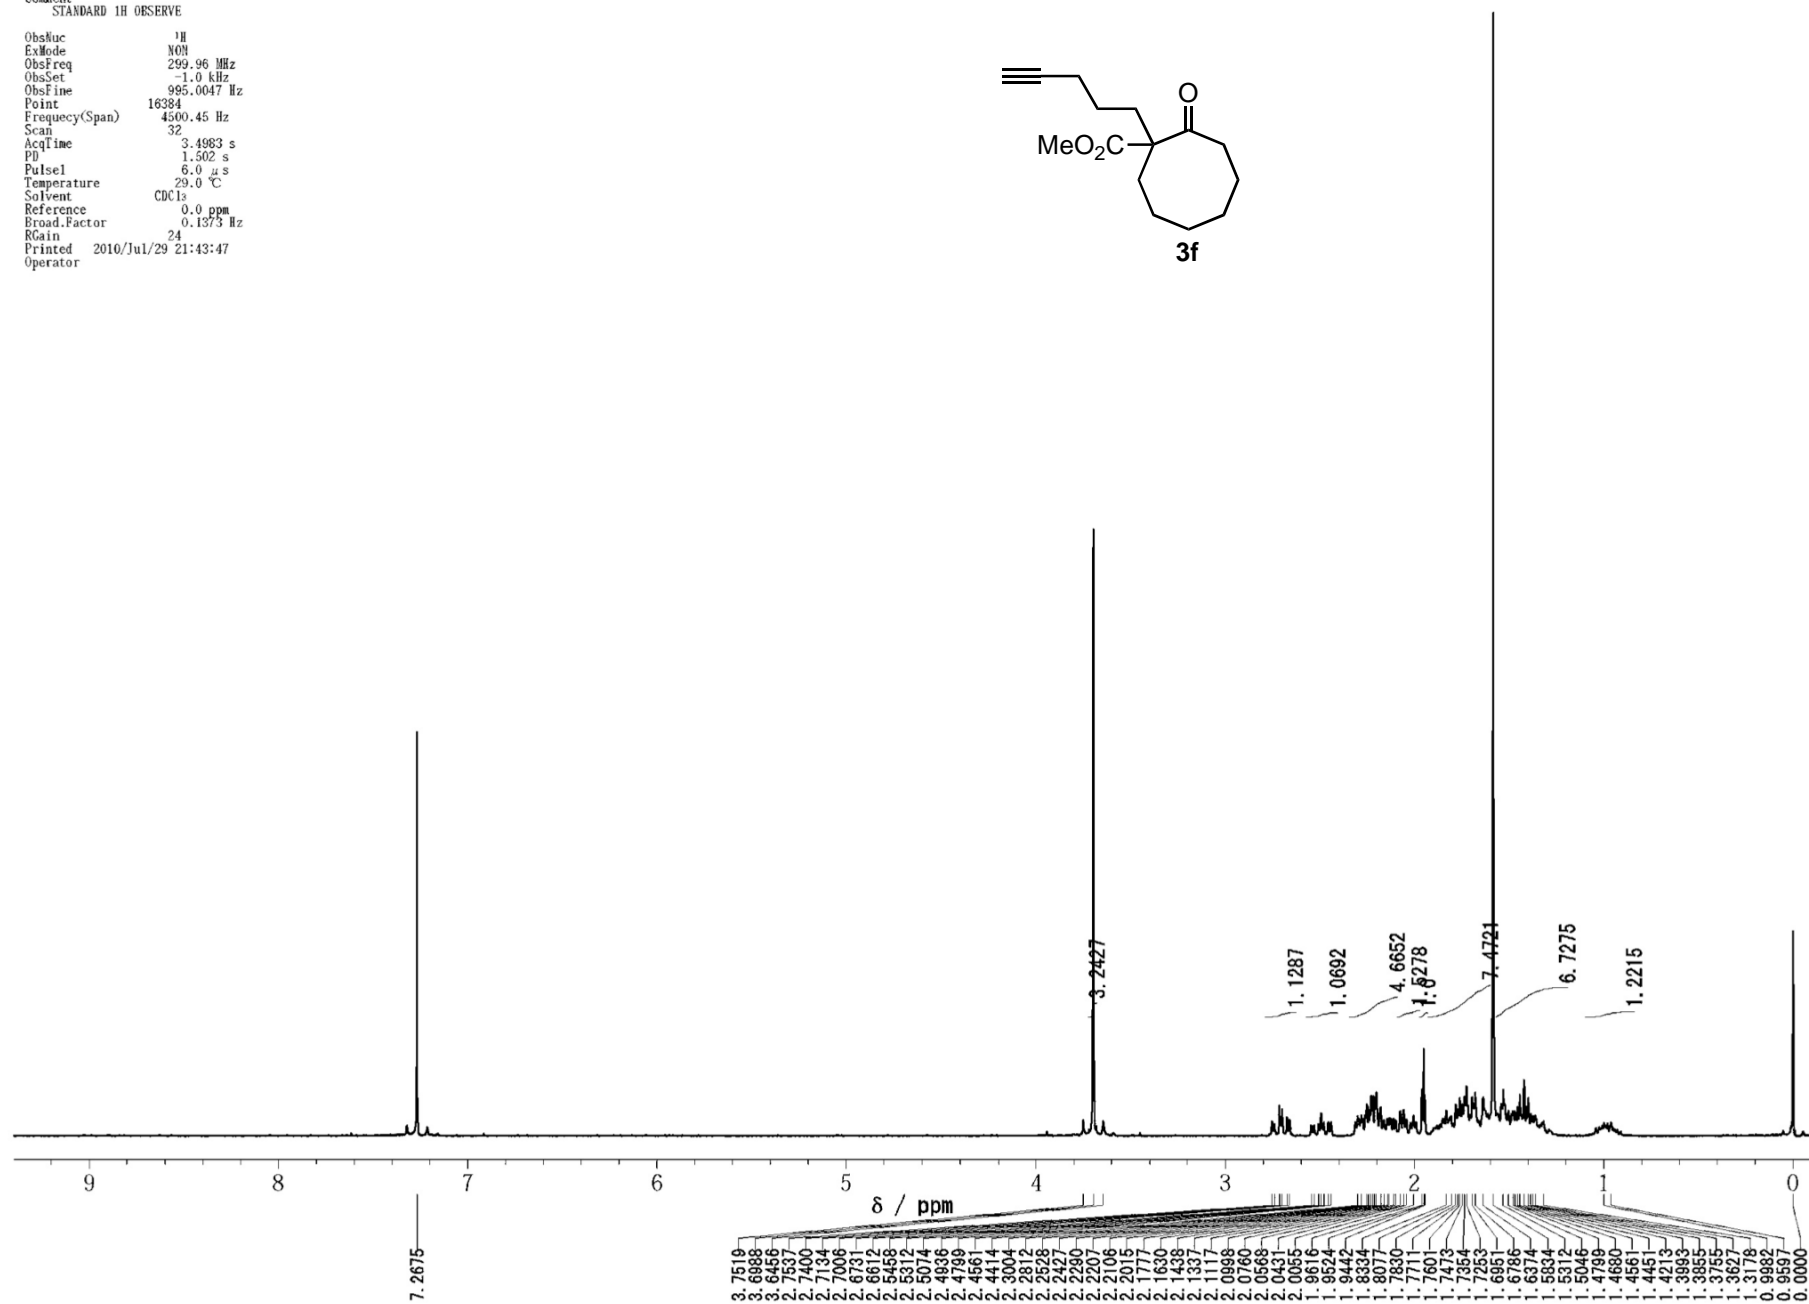

Original File:  
 Date Jul 23 10  
 Comment C13 Standard Observe  
 Stick=none Tune=6.4 Match=0.4

ObsRuc 13C  
 ExMode NOM  
 ObsFreq 75.43 MHz  
 ObsSet -1.0 kHz  
 ObsFine 996.3672 Hz  
 Point 32768  
 Frequency(Span) 18761.73 Hz  
 Scan 112  
 AcqTime 1.4992 s  
 PD 1.501 s  
 Pulse 6.0  $\mu$ s  
 Temperature 29.0  $^{\circ}$ C  
 Solvent CDCl<sub>3</sub>  
 Reference 77.0 ppm  
 Broad.Factor 0.2863 Hz  
 RGain 30  
 Printed 2010/Jul/29 21:45:19  
 Operator

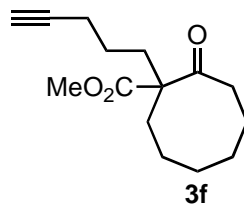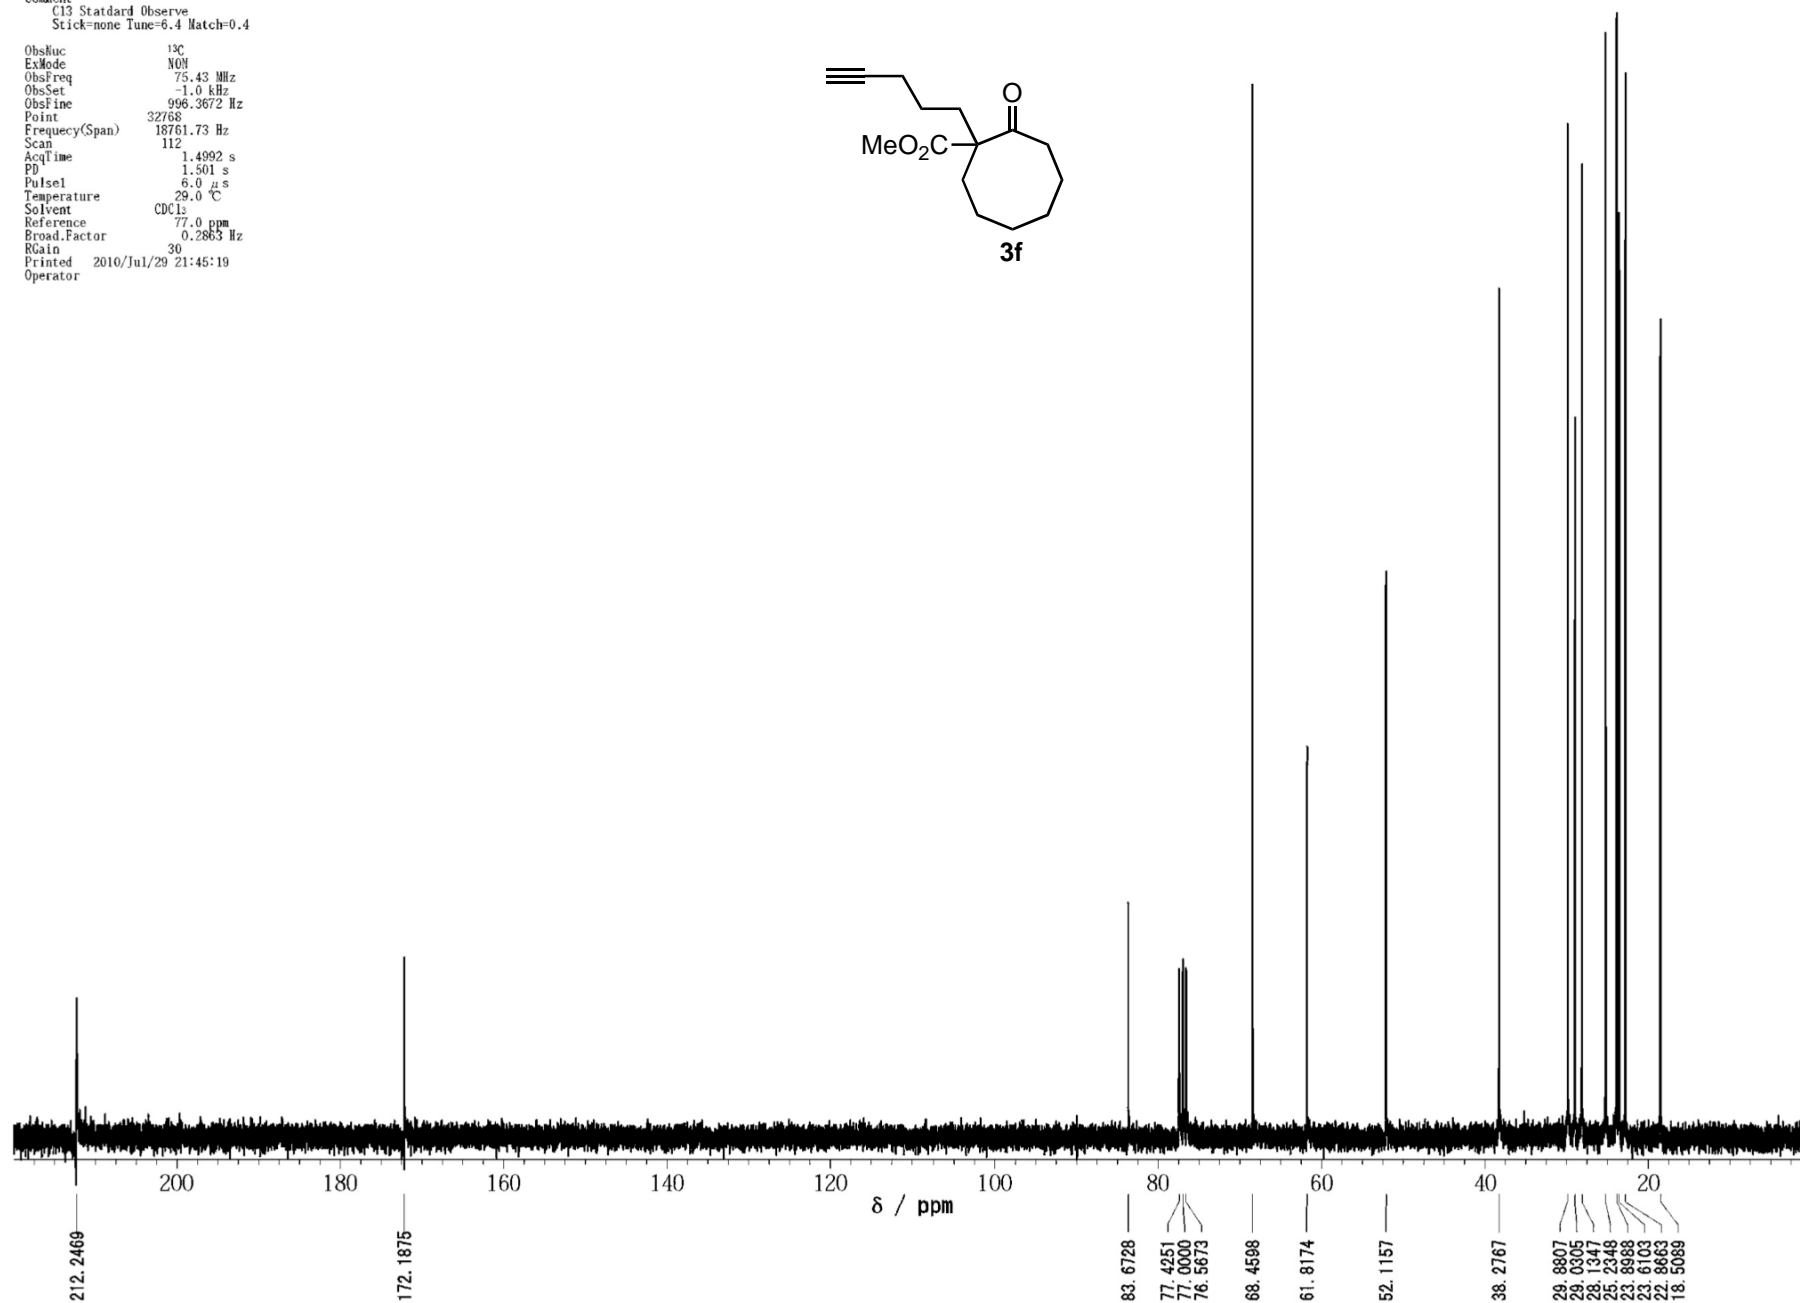

Original File: C:\DOCUMENTS AND SETTINGS\北海道大学\MY DOCUMENTS\DELL NMR データ 06Q14\H1DET04H1D-11-22A-FR1-1H.F

Date Feb 25 10

Comment

STANDARD 1H OBSERVE

Obs Nuc <sup>1</sup>H  
Ex Mode NOE  
Obs Freq 299.96 MHz  
Obs Set -1.0 kHz  
Obs Fine 995.0047 Hz  
Point 16384  
Frequency(Span) 4500.45 Hz  
Scan 16  
Acq Time 3.4983 s  
PD 1.502 s  
Pulse 6.0  $\mu$ s  
Temperature 29.0  $^{\circ}$ C  
Solvent CDCl<sub>3</sub>  
Reference 0.0 ppm  
Broad Factor 0.25 Hz  
RGain 29  
Printed 2010/Jul/29 22:00:44  
Operator

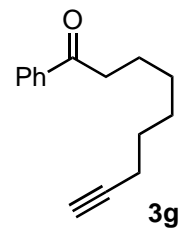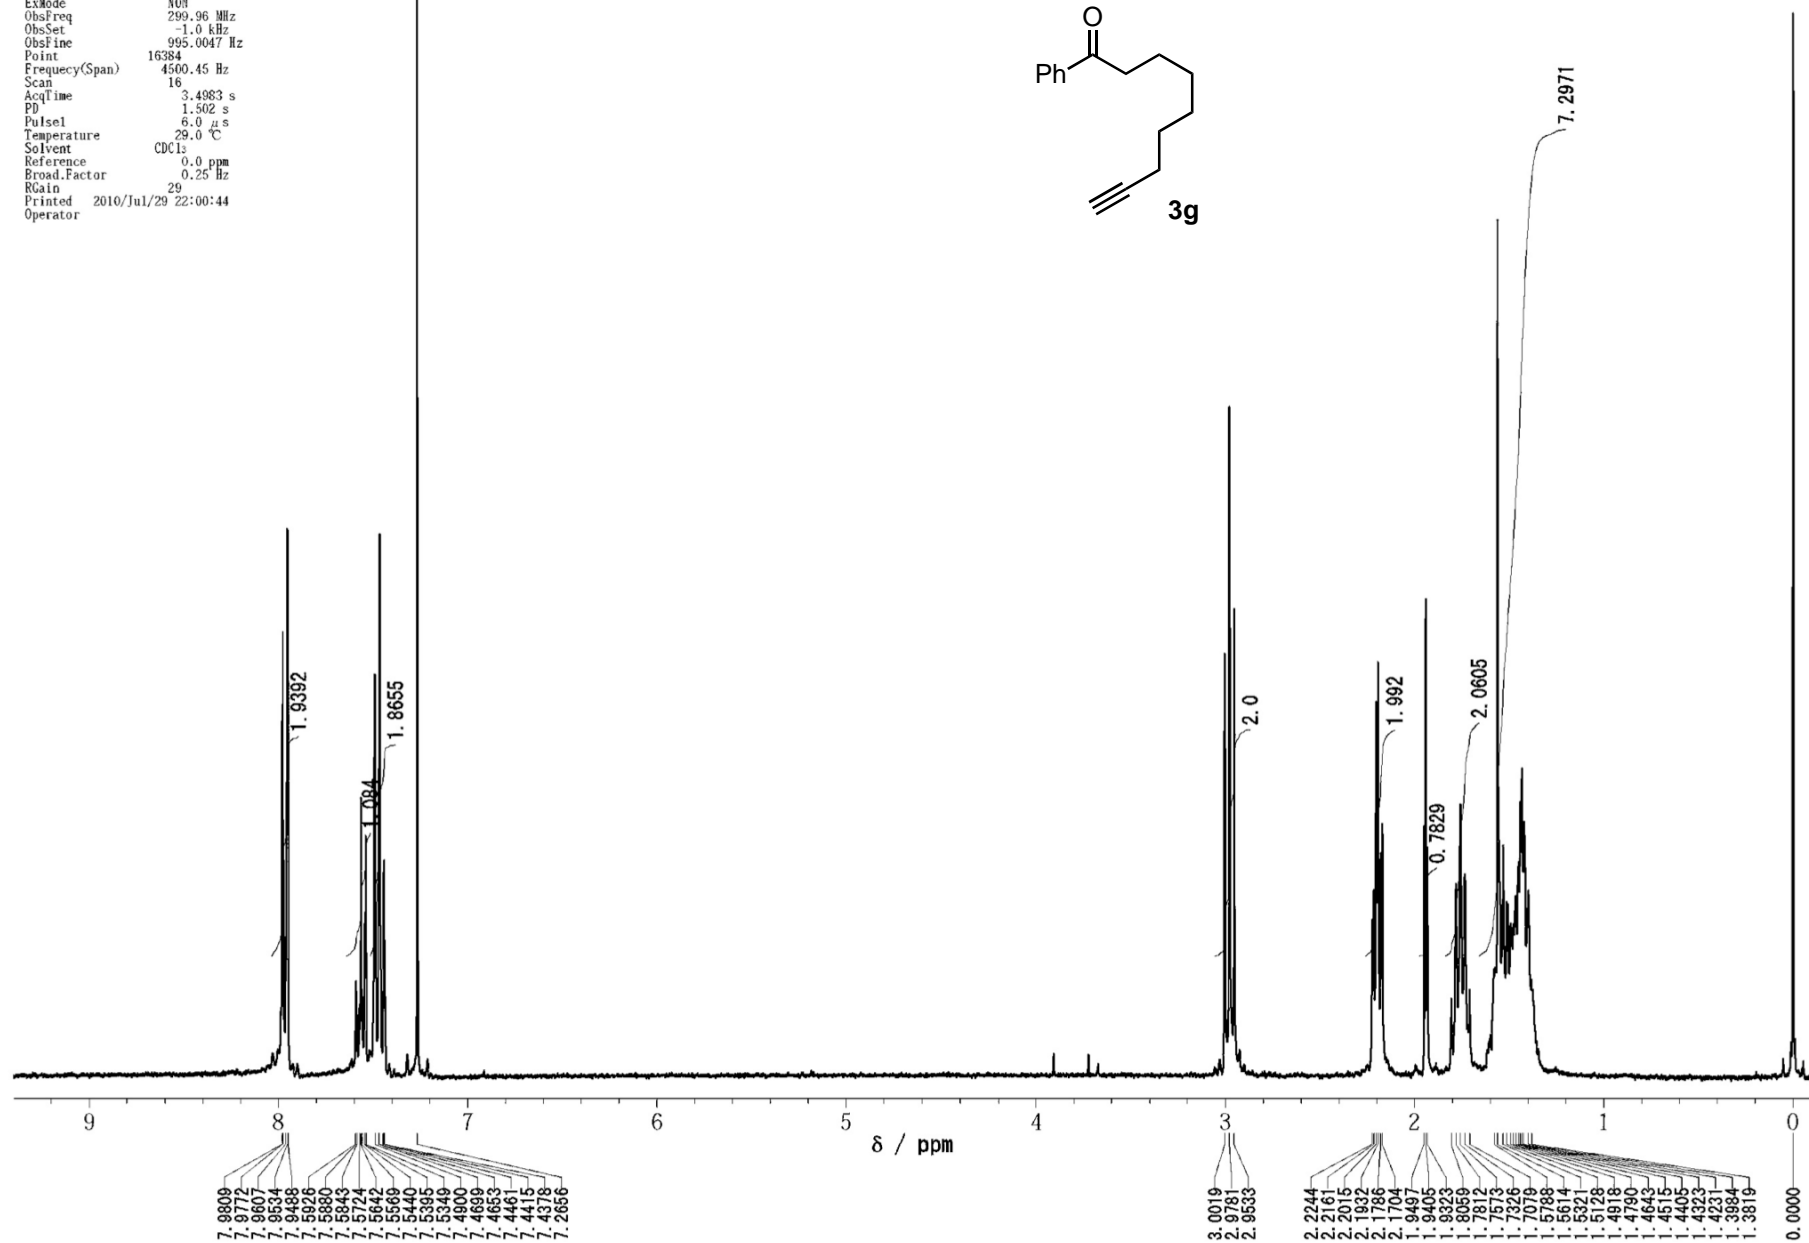



Original File:  
 Date Feb 25 10  
 Comment  
 C13 Standard Observe  
 Stick=none Tune=6.4 Match=0.4

ObsRoc 13C  
 ExMode NOM  
 ObsFreq 75.43 MHz  
 ObsSet -1.0 kHz  
 ObsFine 996.3672 Hz  
 Point 32768  
 Frequency(Span) 18761.73 Hz  
 Scan 64  
 AcqTime 1.4992 s  
 PD 1.501 s  
 Pulse 6.0  $\mu$ s  
 Temperature 29.0  $^{\circ}$ C  
 Solvent CDCl<sub>3</sub>  
 Reference 77.0 ppm  
 Broad.Factor 0.2863 Hz  
 RGain 30  
 Printed 2010/Jul/29 21:56:32  
 Operator

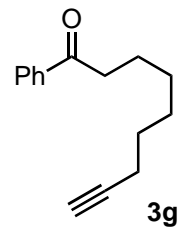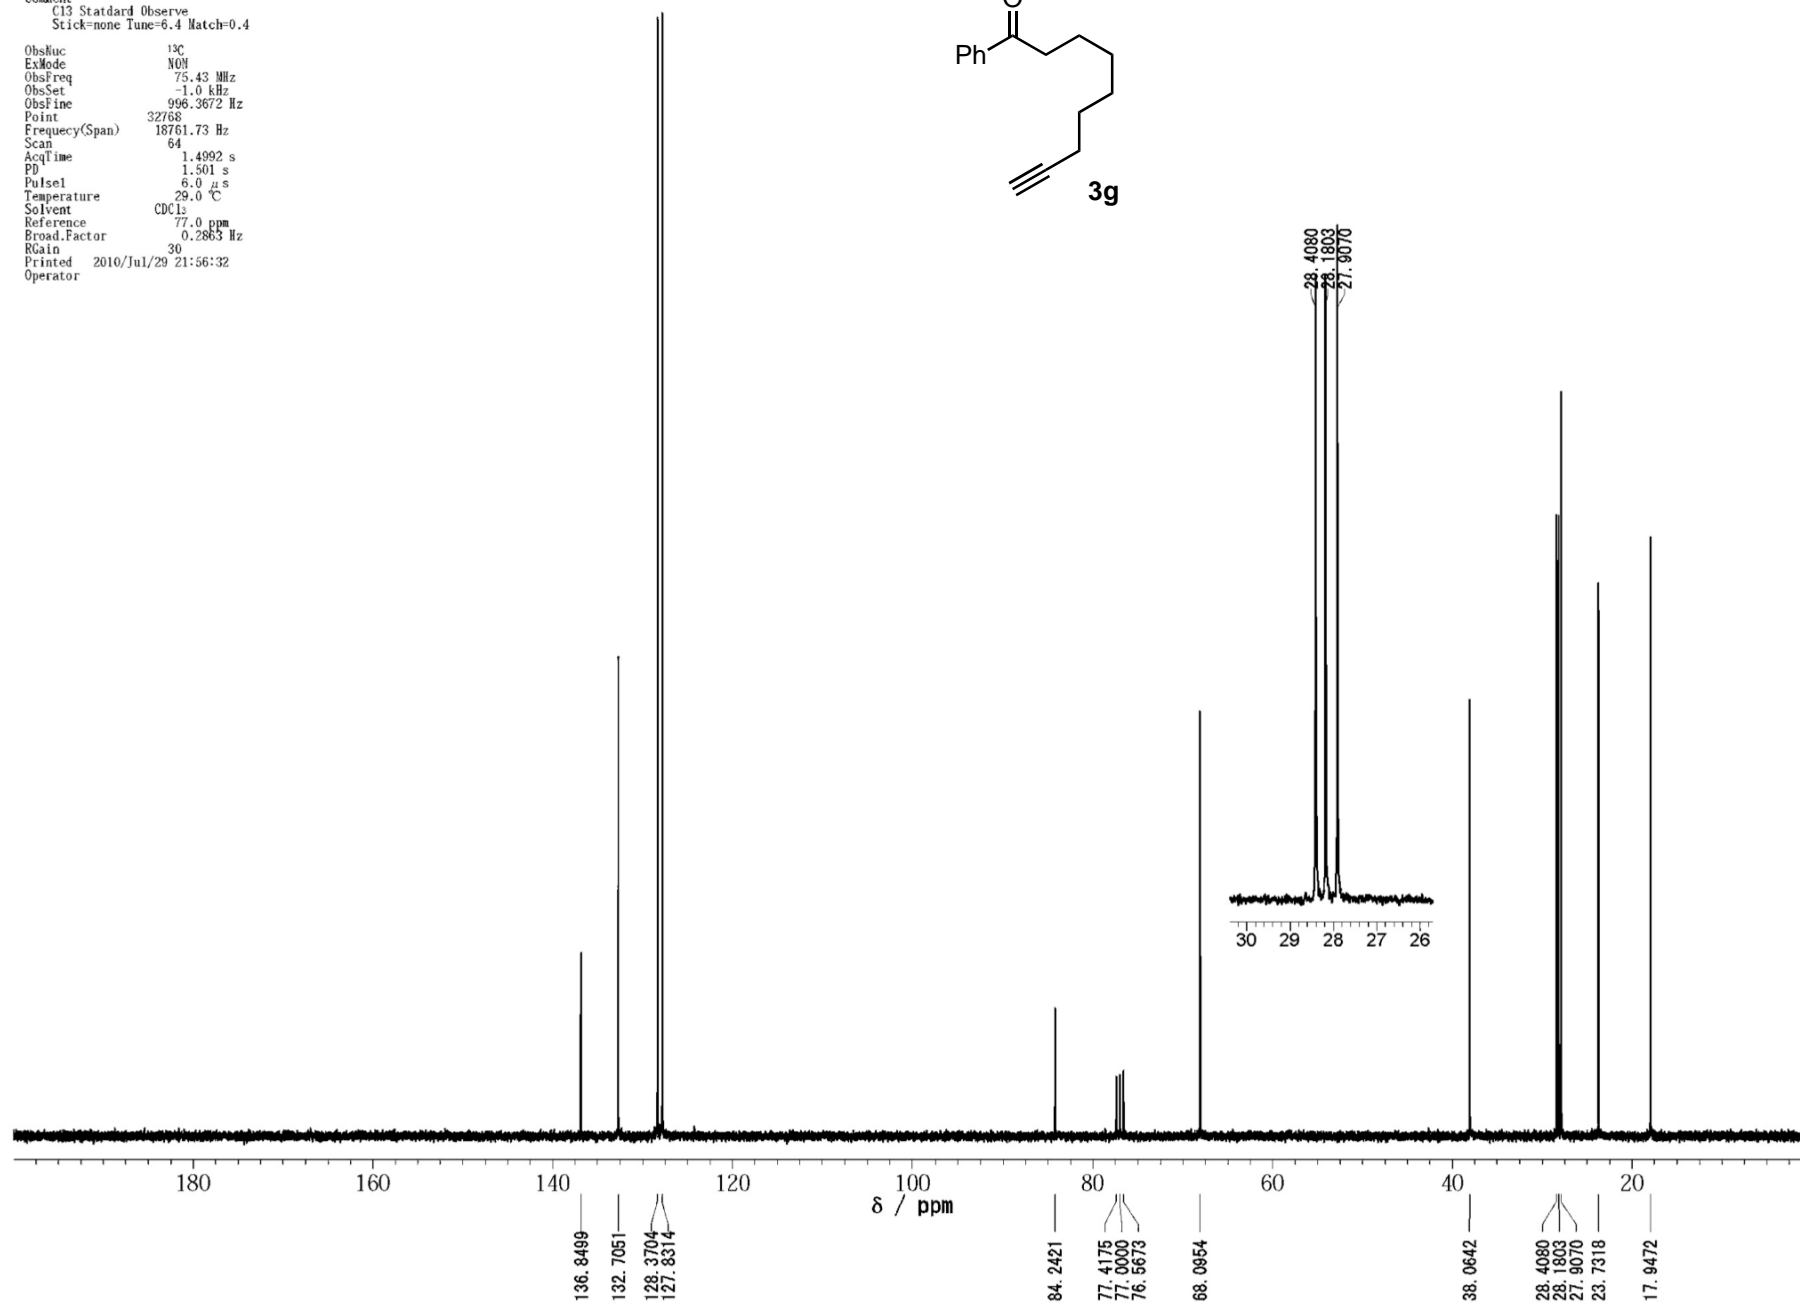

Original File: Jun 9 10  
 Date: Jun 9 10  
 Comment: STANDARD 1H OBSERVE  
 ObsRuoc: 1H  
 ExMode: NMR  
 ObsFreq: 299.96 MHz  
 ObsSet: -1.0 kHz  
 ObsFine: 995.0047 Hz  
 Point: 16384  
 Frequency(Span): 4500.45 Hz  
 Scan: 32  
 AcqTime: 3.4983 s  
 PD: 1.502 s  
 Pulse1: 6.0  $\mu$ s  
 Temperature: 29.0  $^{\circ}$ C  
 Solvent: CDCl<sub>3</sub>  
 Reference: 0.0 ppm  
 Broad.Factor: 0.1373 Hz  
 RGain: 24  
 Printed: 2010/Jul/29 22:26:12  
 Operator:

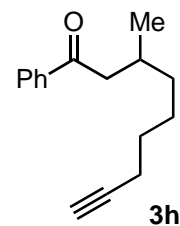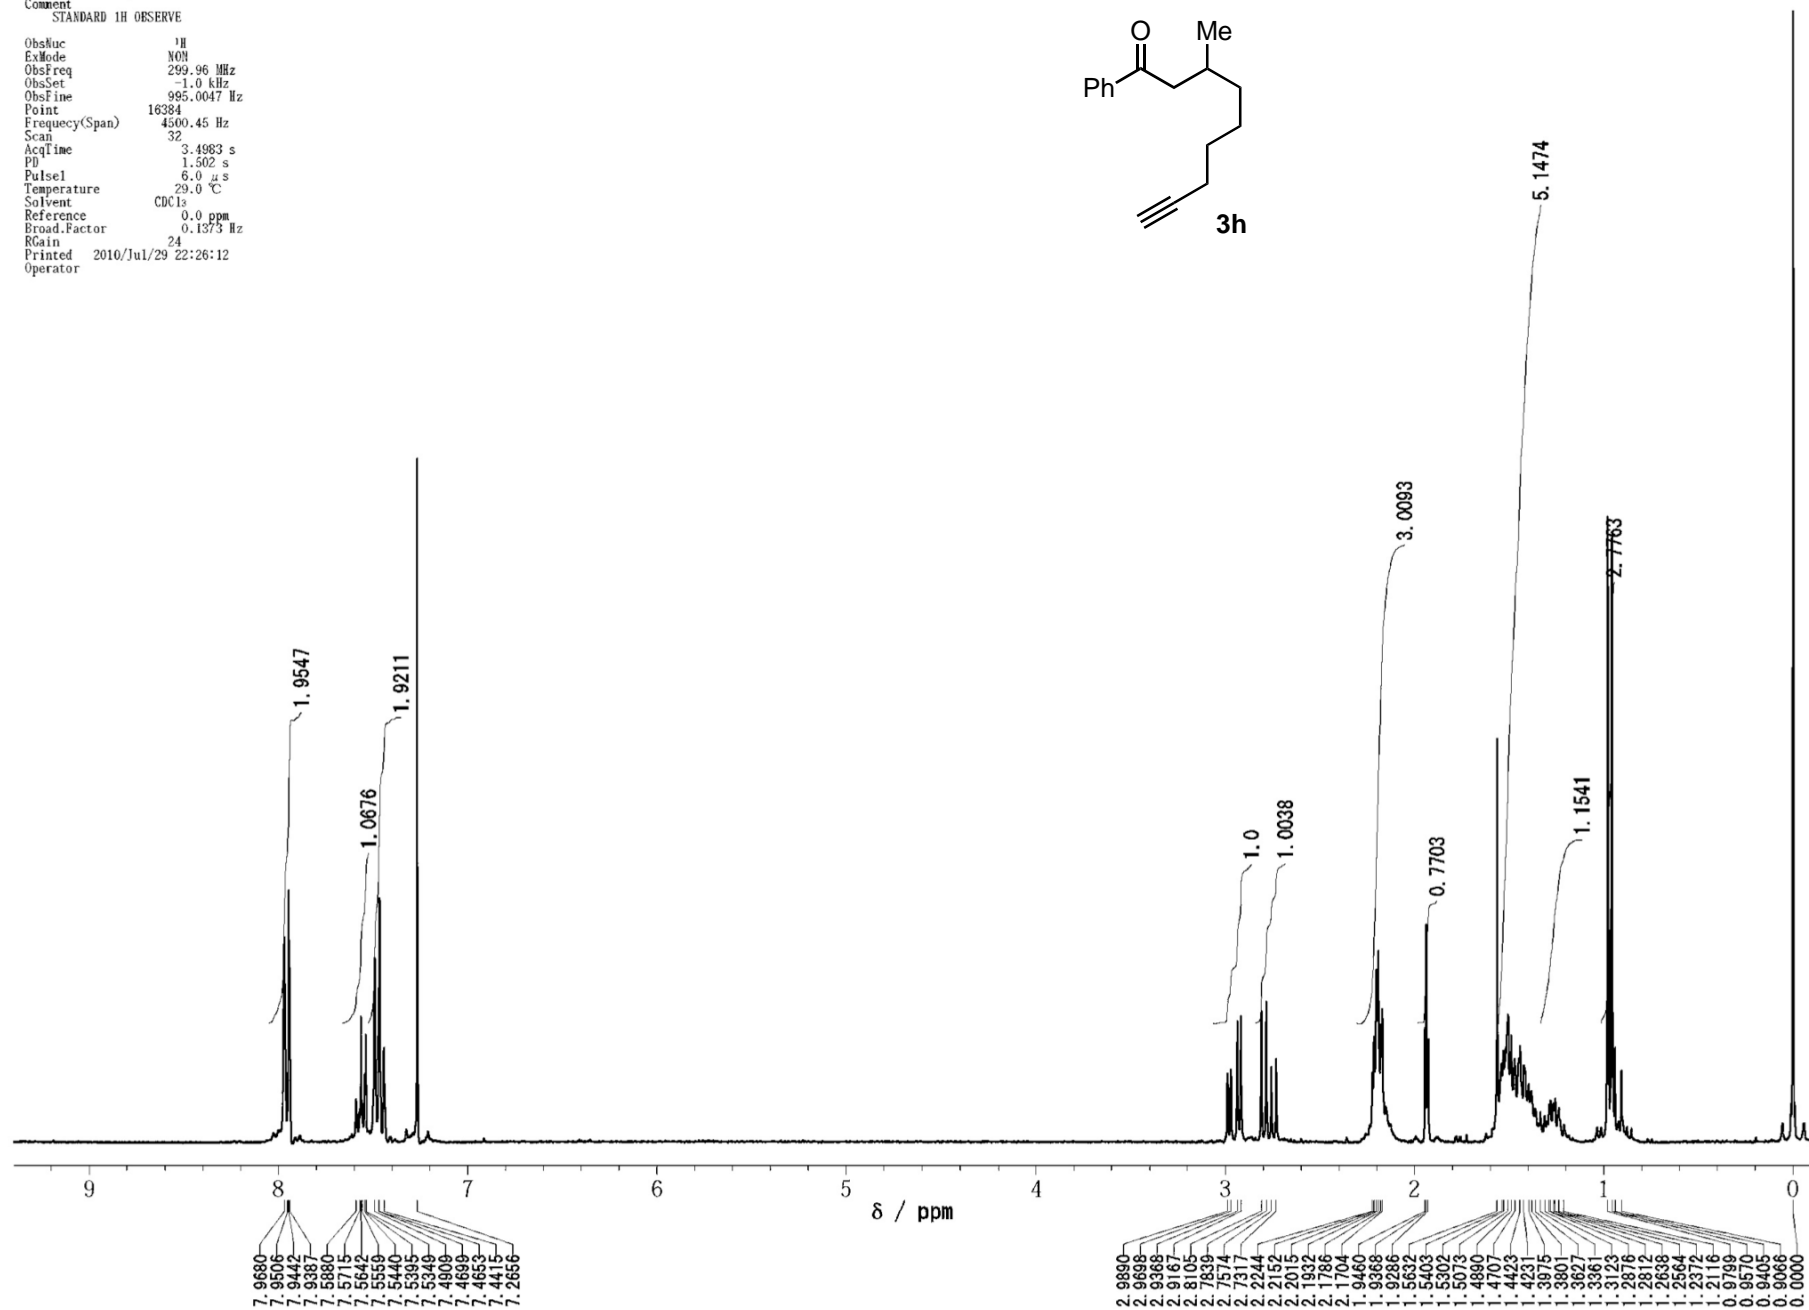

Original File:  
 Date Jun 9 10  
 Comment  
 C13 Standard Observe  
 Stick=none Tune=6.4 Match=0.4

ObsRuc 13C  
 ExMode NOM  
 ObsFreq 75.43 MHz  
 ObsSet -1.0 kHz  
 ObsFine 996.3672 Hz  
 Point 32768  
 Frequency(Span) 18761.73 Hz  
 Scan 192  
 AcqTime 1.4992 s  
 PD 1.501 s  
 Pulse 6.0  $\mu$ s  
 Temperature 29.0  $^{\circ}$ C  
 Solvent CDCl<sub>3</sub>  
 Reference 77.0 ppm  
 Broad.Factor 0.2863 Hz  
 RGain 30  
 Printed 2010/Jul/29 22:24:19  
 Operator

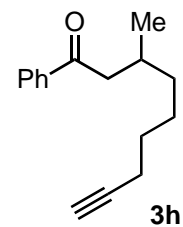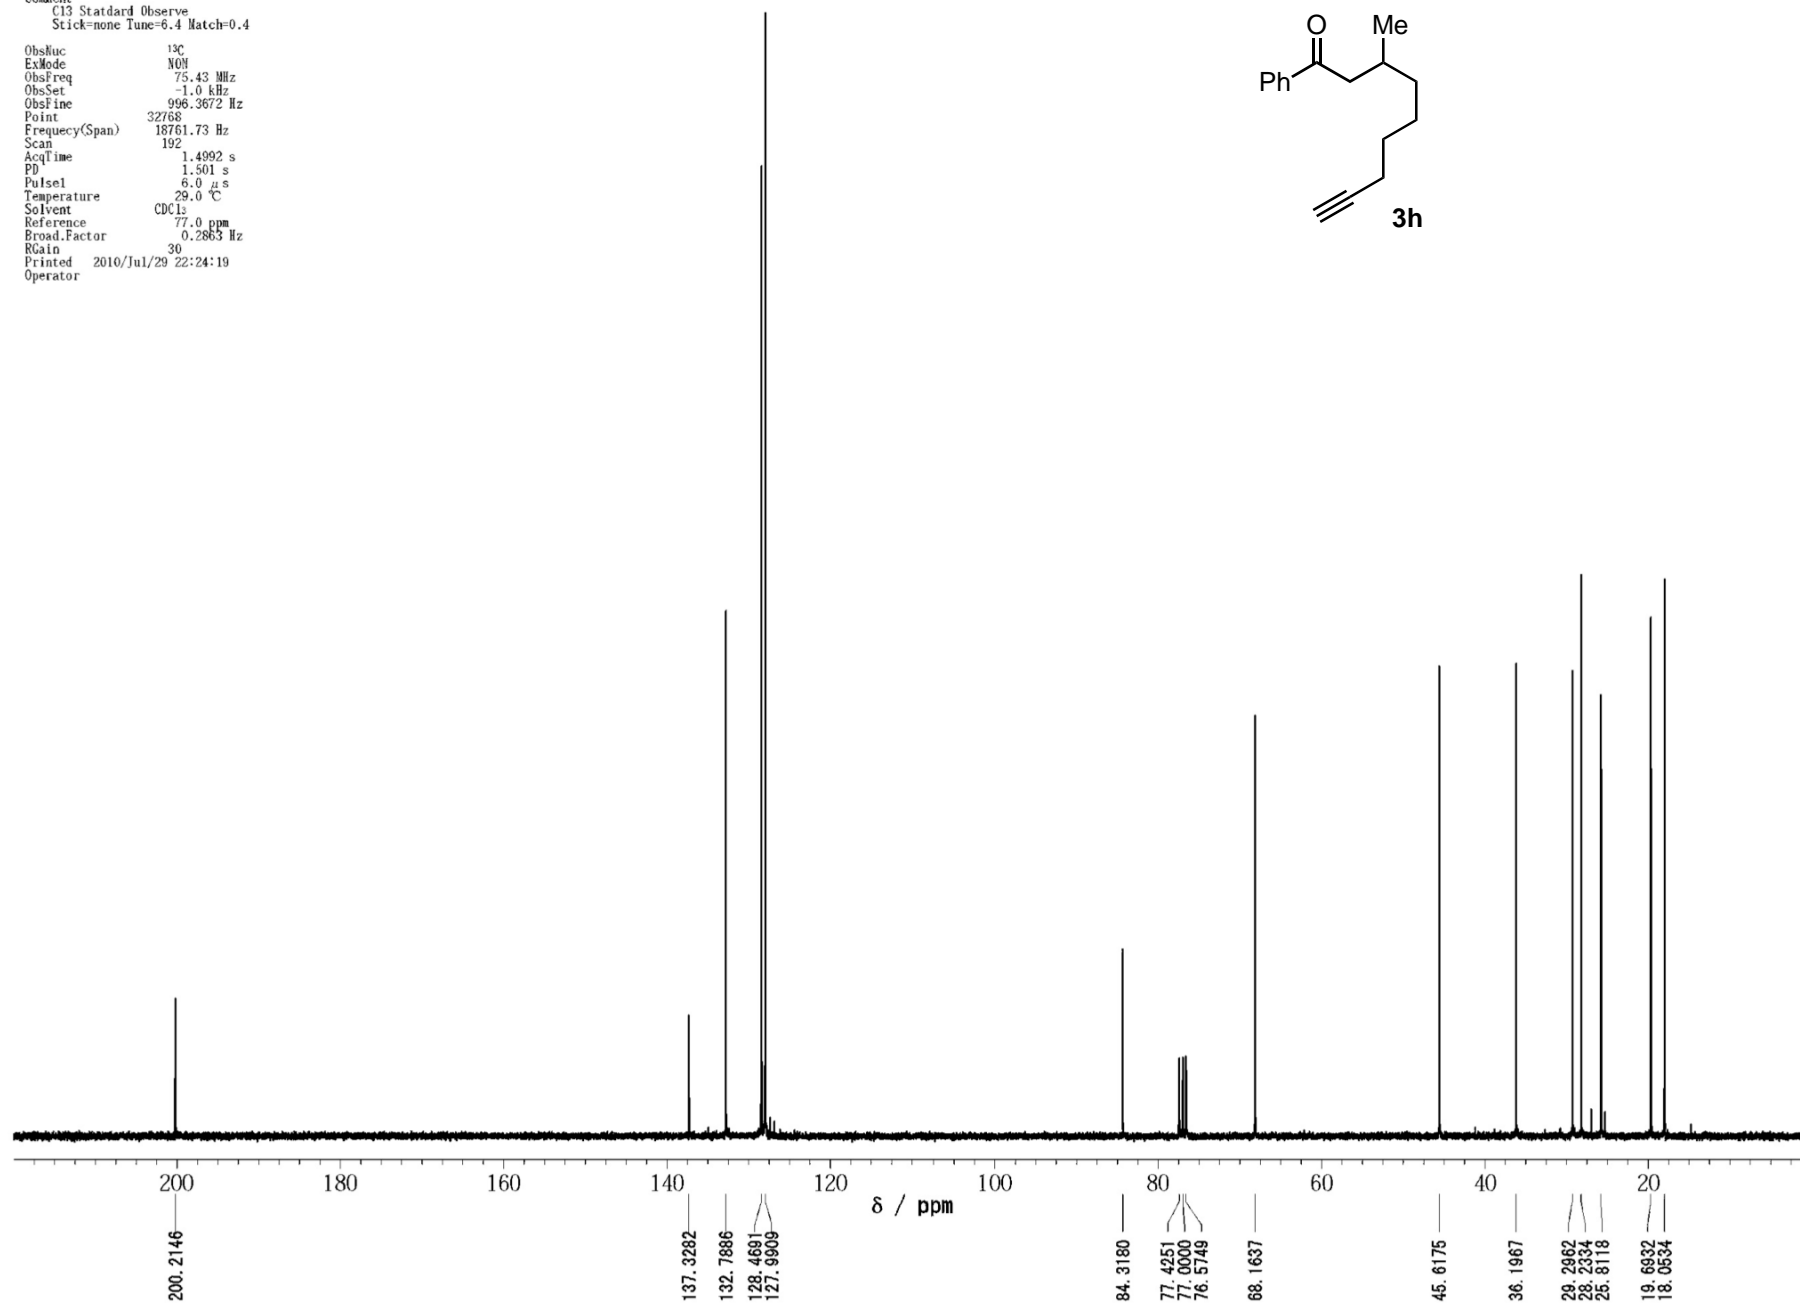

Original File:   
 Date Feb 20 10   
 Comment   
 STANDARD 1H OBSERVE   
 ObsRuoc <sup>1</sup>H   
 ExMode NMR   
 ObsFreq 299.96 MHz   
 ObsSet -1.0 kHz   
 ObsFine 995.0047 Hz   
 Point 16384   
 Frequency(Span) 4500.45 Hz   
 Scan 16   
 AcqTime 3.4983 s   
 PD 1.502 s   
 Pulse1 6.0  $\mu$ s   
 Temperature 29.0  $^{\circ}$ C   
 Solvent CDCl<sub>3</sub>   
 Reference 0.0 ppm   
 Broad.Factor 0.1373 Hz   
 RGain 24   
 Printed 2010/Jul/30 09:20:35   
 Operator

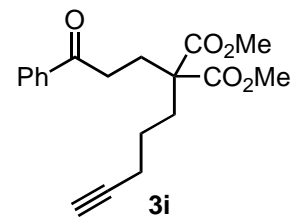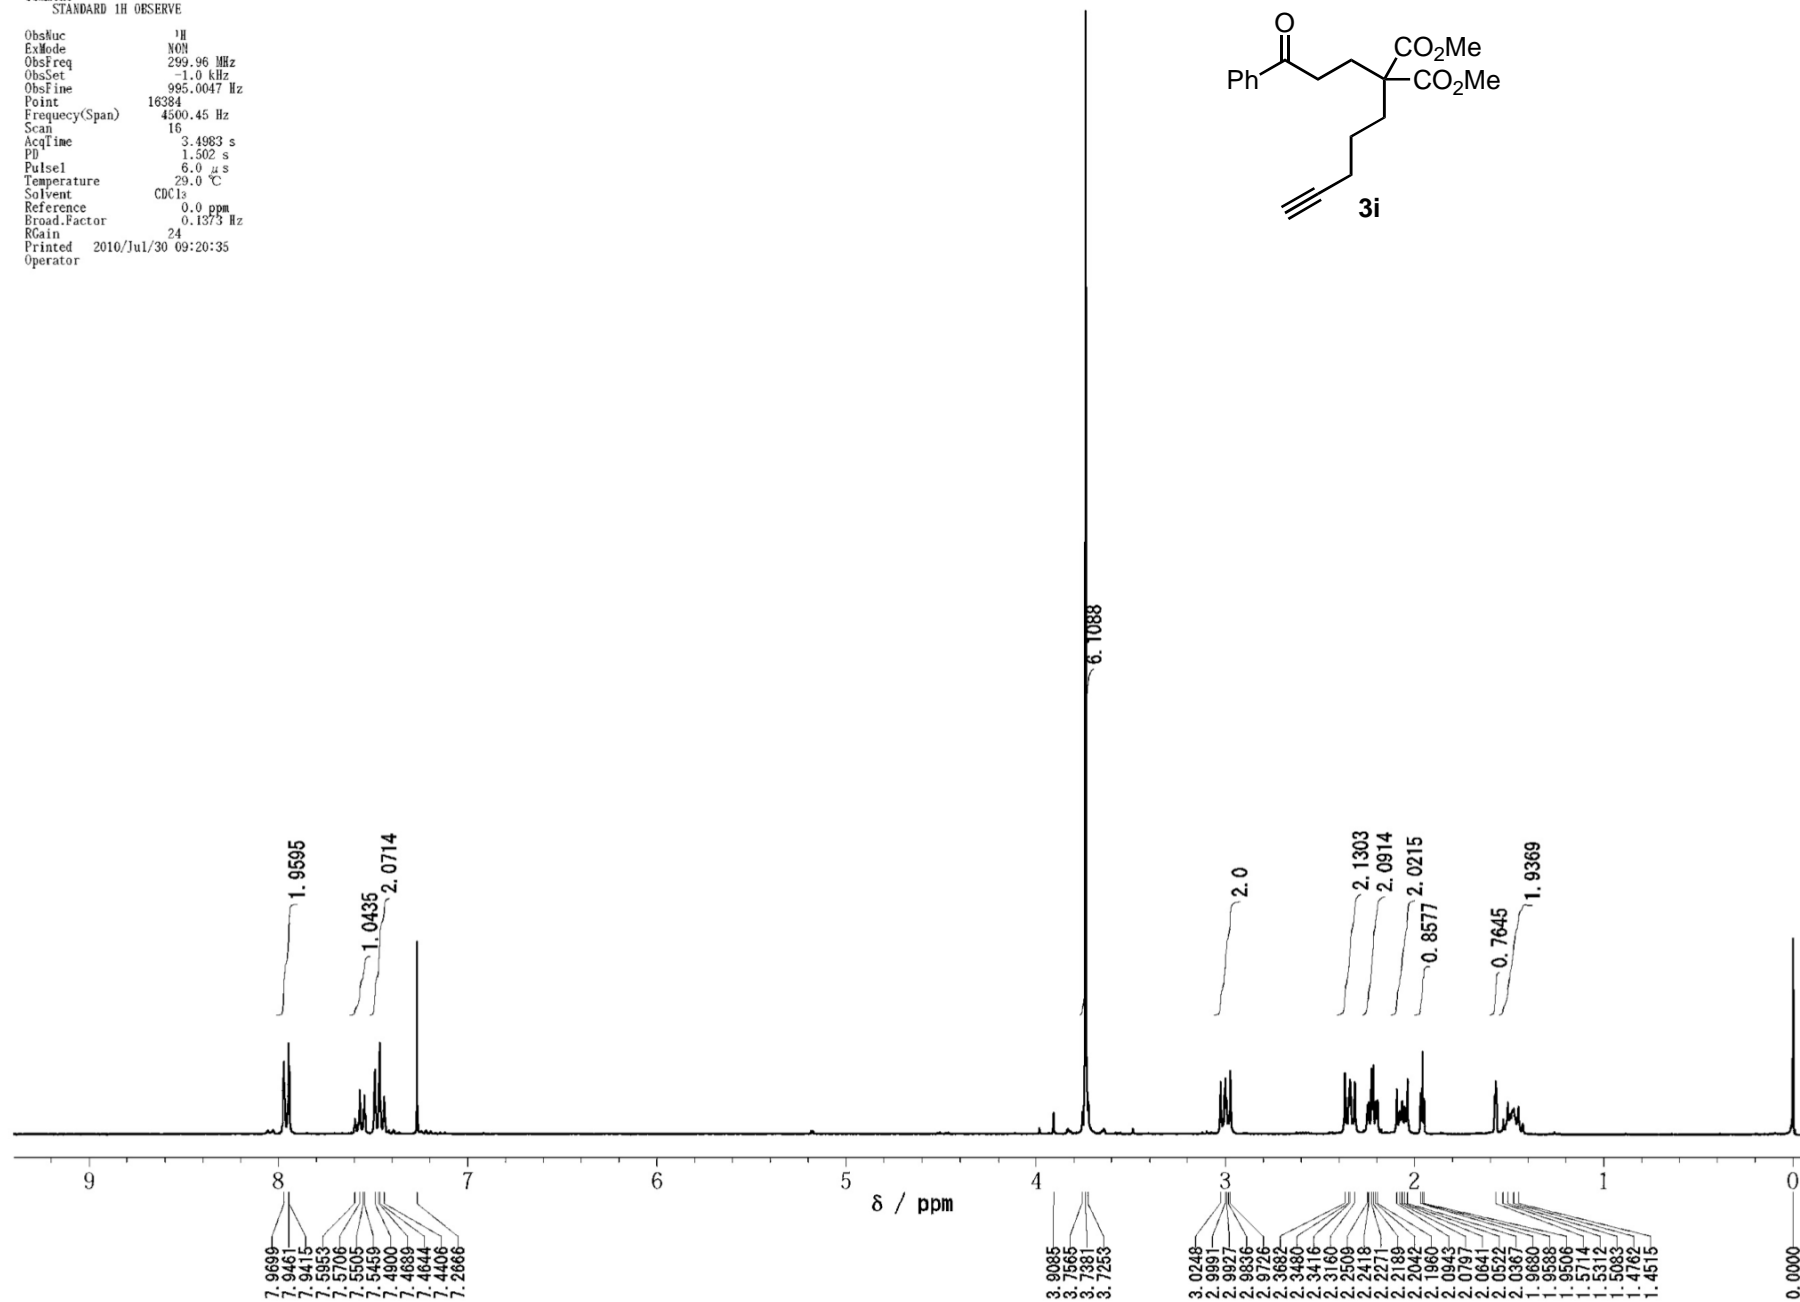

Original File:  
 Date Feb 20 10  
 Comment  
 C13 Standard Observe  
 Stick=none Tune=6.4 Match=0.4

ObsRoc 13C  
 ExMode NOM  
 ObsFreq 75.43 MHz  
 ObsSet -1.0 kHz  
 ObsFine 996.3672 Hz  
 Point 32768  
 Frequency(Span) 18761.73 Hz  
 Scan 336  
 AcqTime 1.4992 s  
 PD 1.501 s  
 Pulse 6.0  $\mu$ s  
 Temperature 29.0  $^{\circ}$ C  
 Solvent CDCl<sub>3</sub>  
 Reference 77.0 ppm  
 Broad.Factor 0.2863 Hz  
 RGain 30  
 Printed 2010/Jul/30 09:21:49  
 Operator

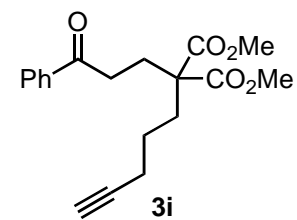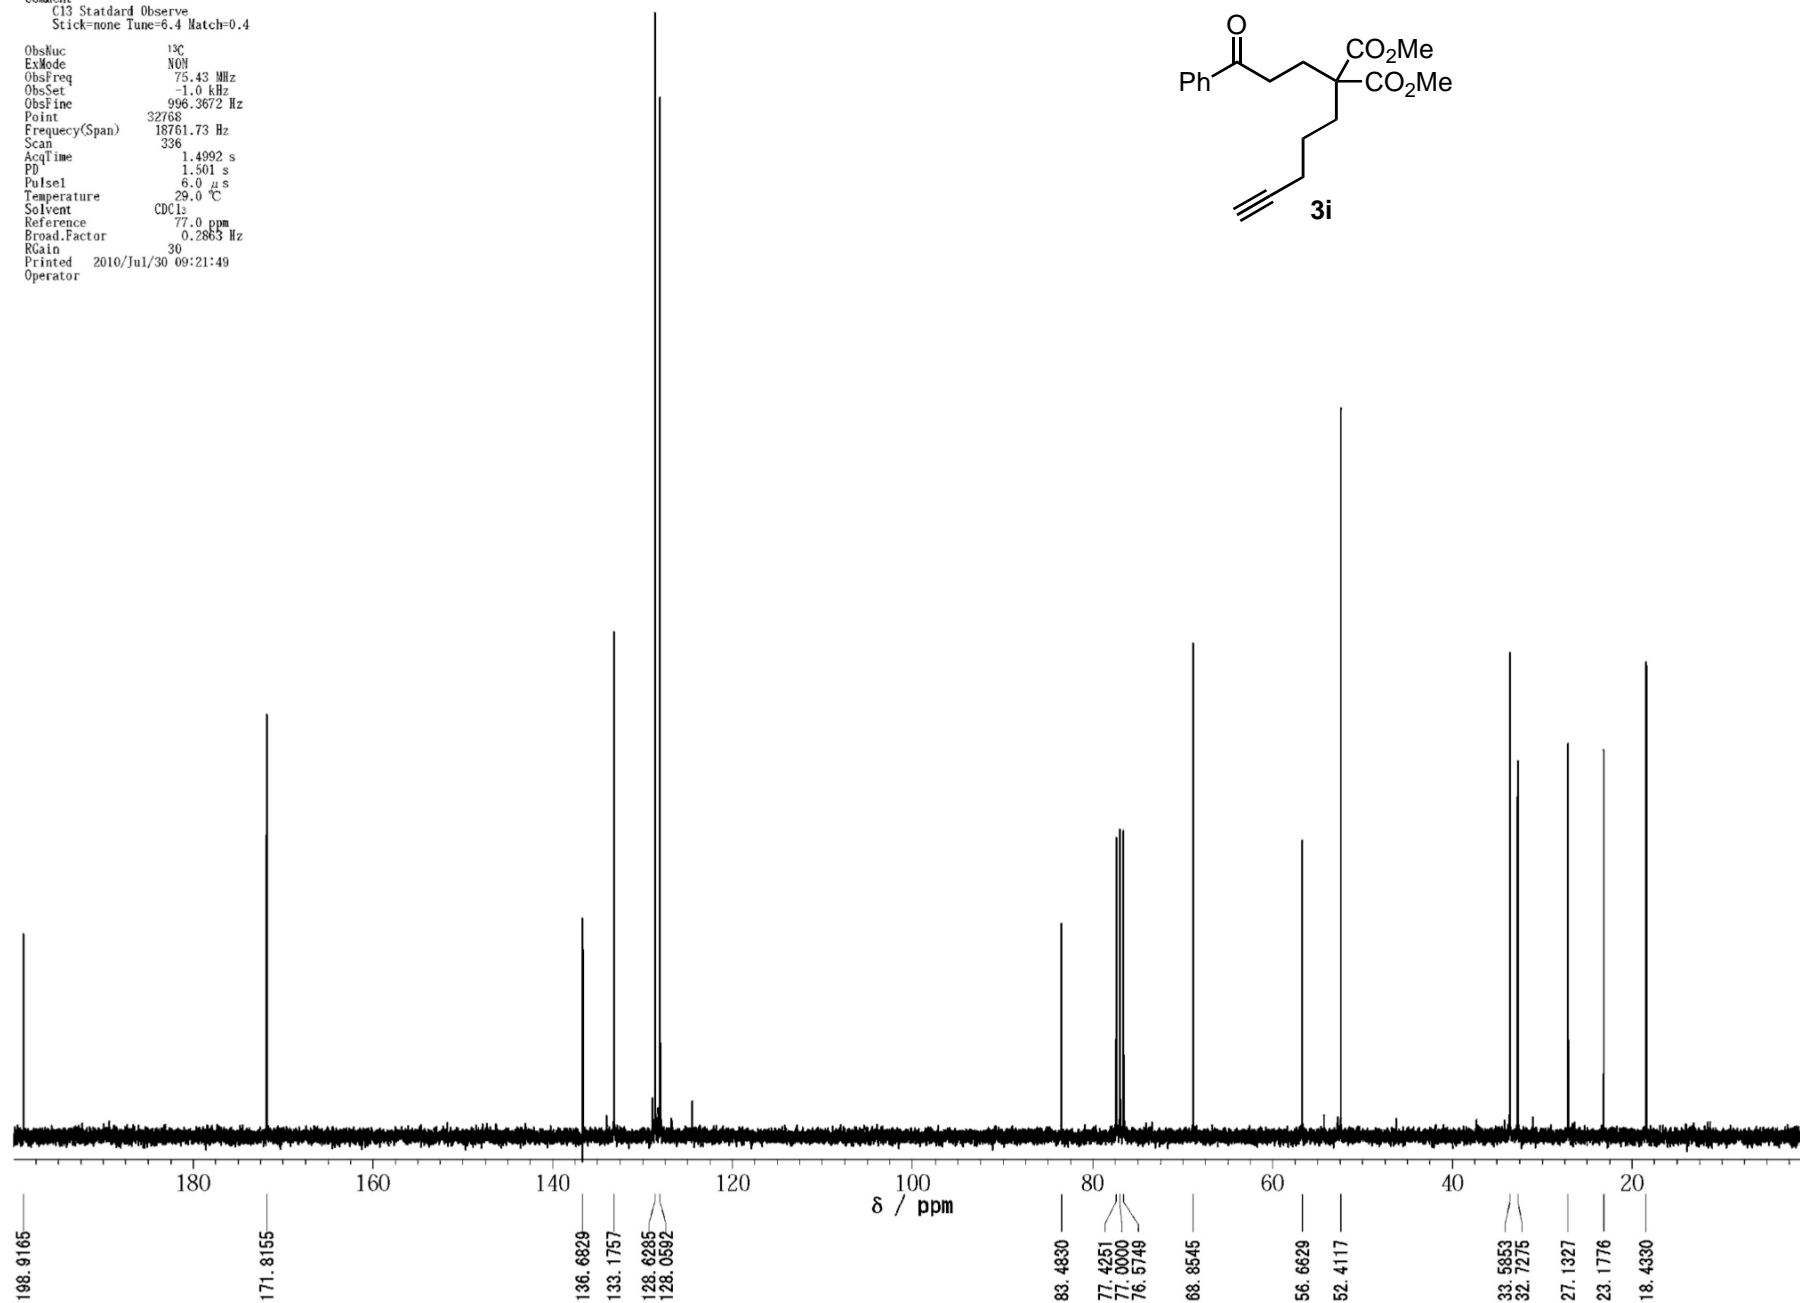

Original File: Jan 26 10  
 Date  
 Comment  
 STANDARD 1H OBSERVE  
 ObsMod 1H  
 ExMode NMR  
 ObsFreq 299.96 MHz  
 ObsSet -1.0 kHz  
 ObsFine 995.0047 Hz  
 Point 16384  
 Frequency(Span) 4500.45 Hz  
 Scan 32  
 AcqTime 3.4983 s  
 PD 1.502 s  
 Pulse1 6.0  $\mu$ s  
 Temperature 29.0  $^{\circ}$ C  
 Solvent CDCl<sub>3</sub>  
 Reference 0.0 ppm  
 Broad.Factor 0.1373 Hz  
 RGain 24  
 Printed 2010/Jul/30 09:36:43  
 Operator

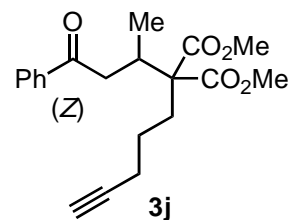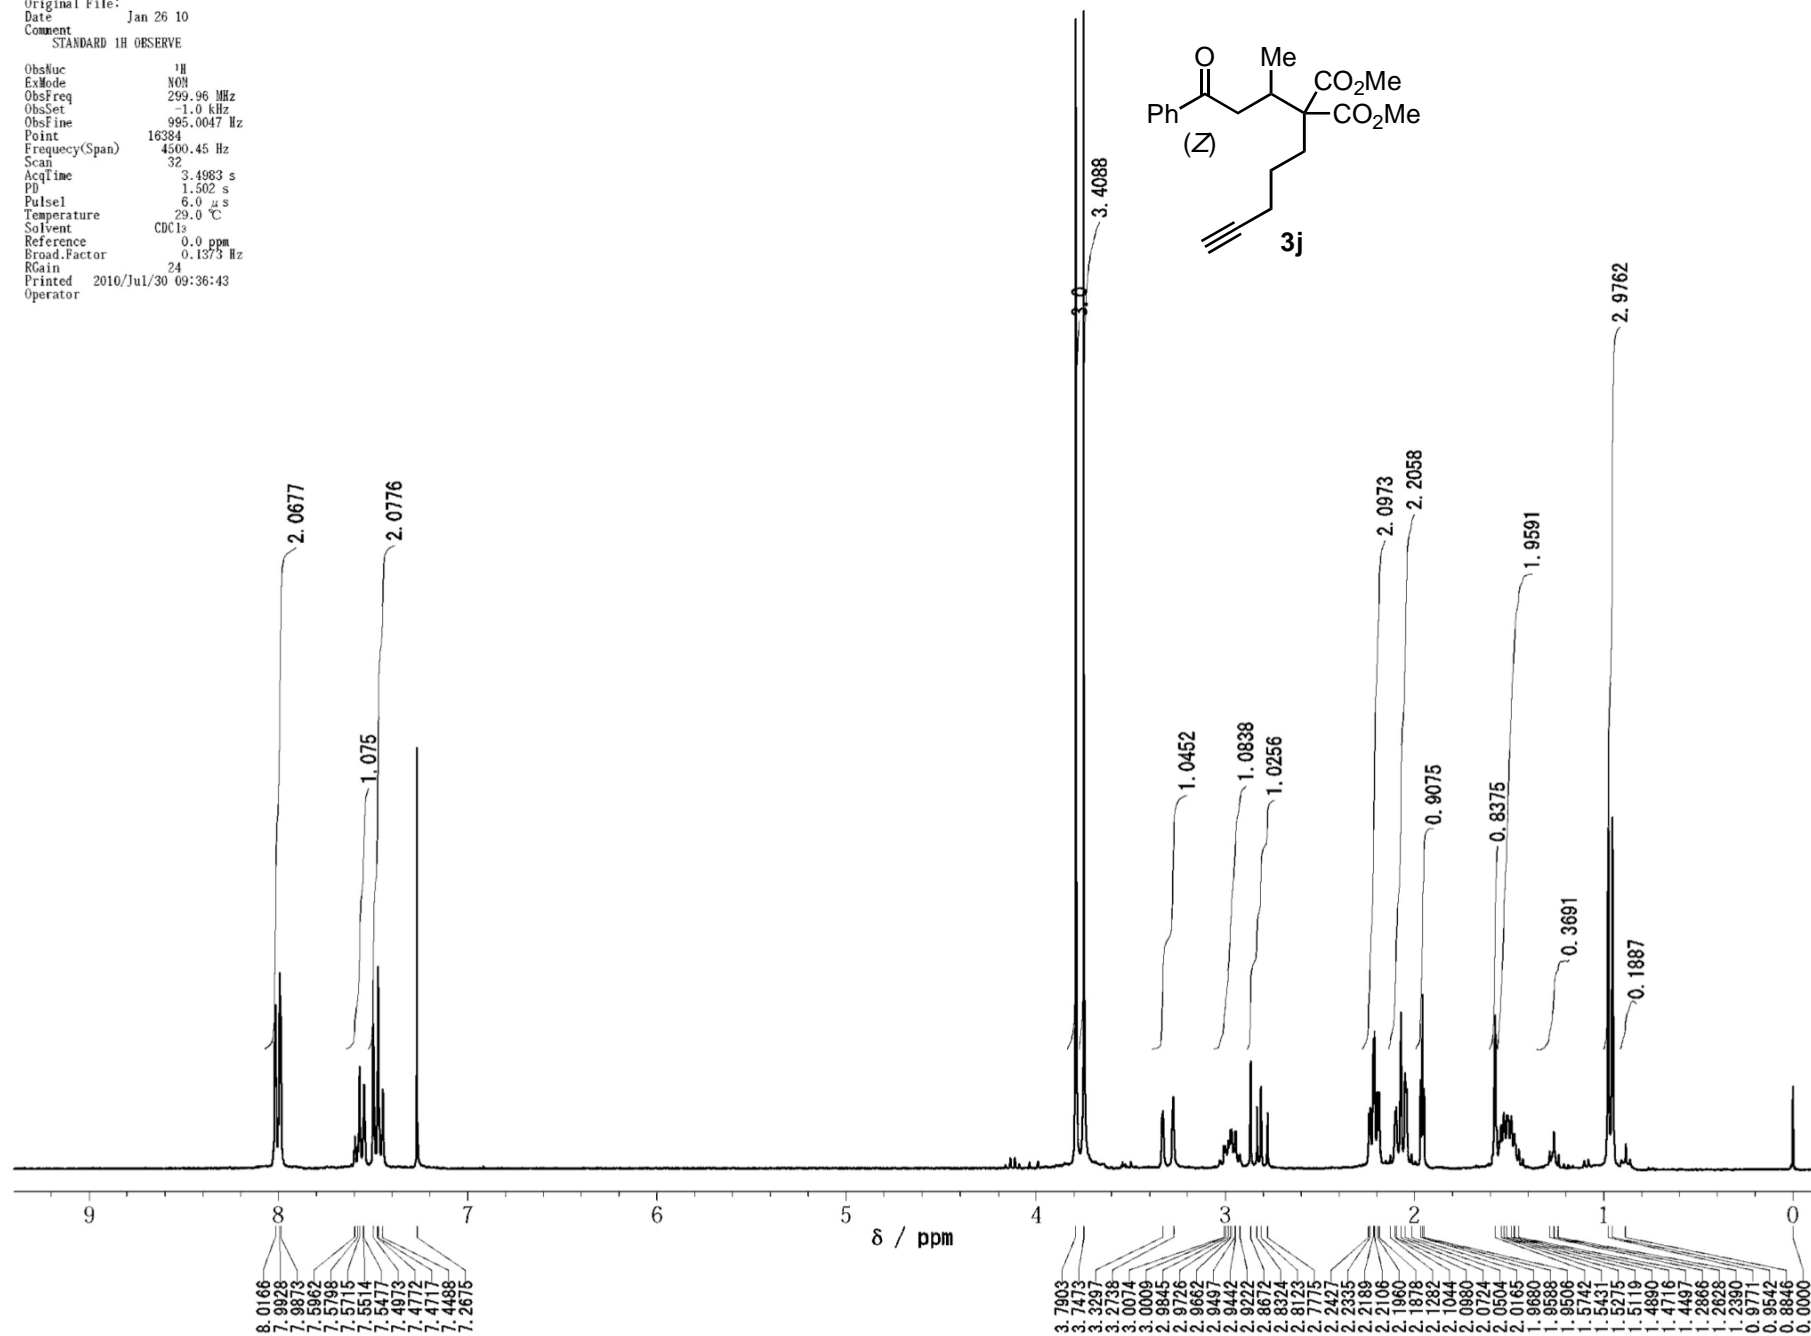

Original File:  
 Date Jan 26 10  
 Comment  
 C13 Standard Observe  
 Stick=none Tune=6.4 Match=0.4

ObsRuc 13C  
 ExMode NOM  
 ObsFreq 75.43 MHz  
 ObsSet -1.0 kHz  
 ObsFine 996.3672 Hz  
 Point 32768  
 Frequency(Span) 18761.73 Hz  
 Scan 128  
 AcqTime 1.4992 s  
 PD 1.501 s  
 Pulse1 6.0  $\mu$ s  
 Temperature 29.0  $^{\circ}$ C  
 Solvent CDCl<sub>3</sub>  
 Reference 77.0 ppm  
 Broad.Factor 0.2863 Hz  
 RGain 30  
 Printed 2010/Jul/30 09:37:40  
 Operator

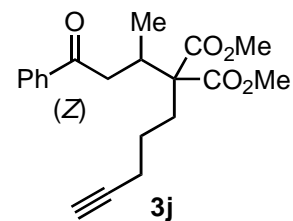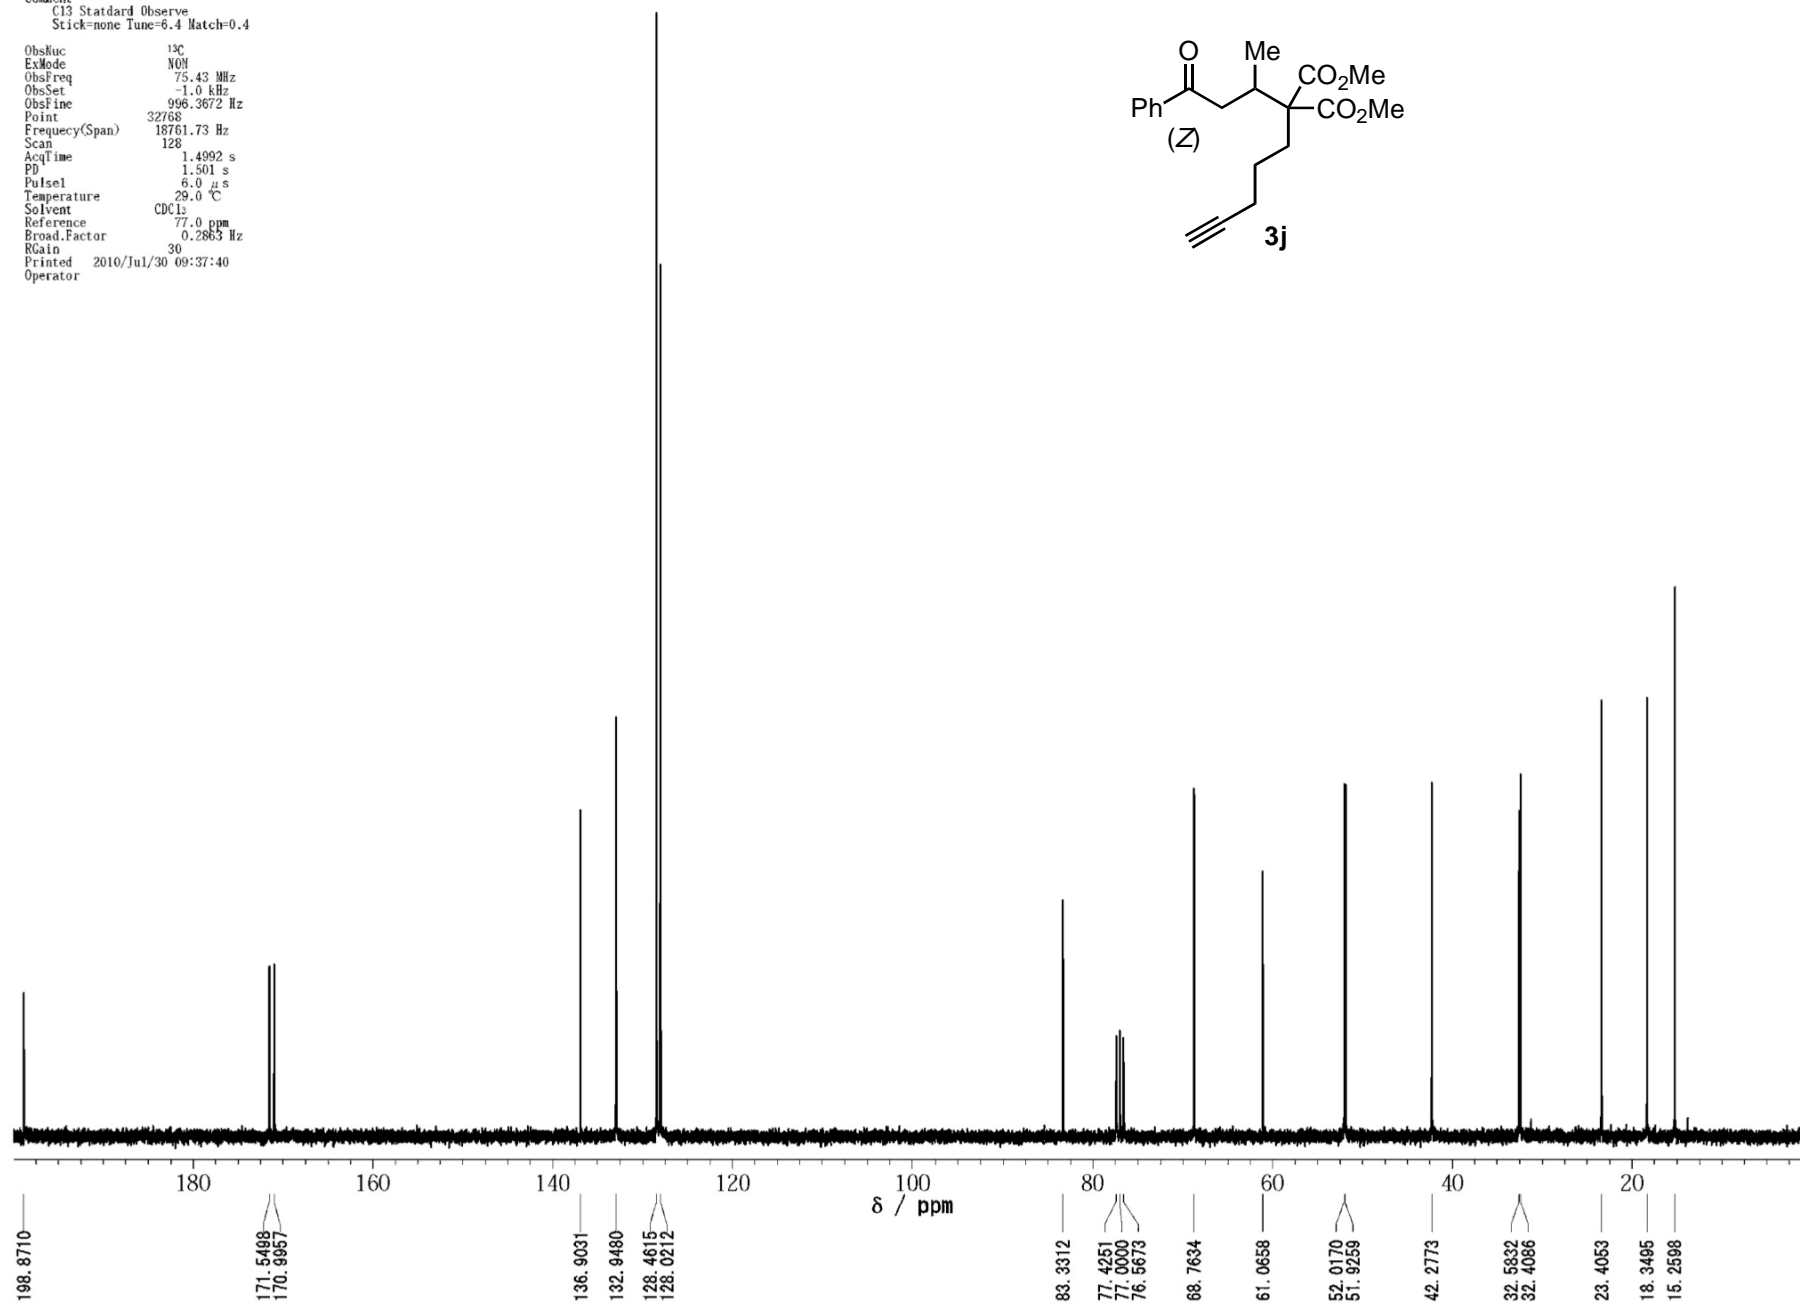

Original File: Jul 27 10  
 Date  
 Comment  
 STANDARD 1H OBSERVE  
 ObsRuoc <sup>1</sup>H  
 ExMode NMR  
 ObsFreq 299.96 MHz  
 ObsSet -1.0 kHz  
 ObsFine 995.0047 Hz  
 Point 16384  
 Frequency(Span) 4500.45 Hz  
 Scan 32  
 AcqTime 3.4983 s  
 PD 1.502 s  
 Pulse1 6.0  $\mu$ s  
 Temperature 29.0  $^{\circ}$ C  
 Solvent CDCl<sub>3</sub>  
 Reference 0.0 ppm  
 Broad.Factor 0.1373 Hz  
 RGain 18  
 Printed 2010/Jul/30 09:48:16  
 Operator

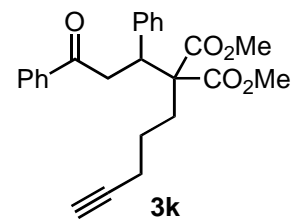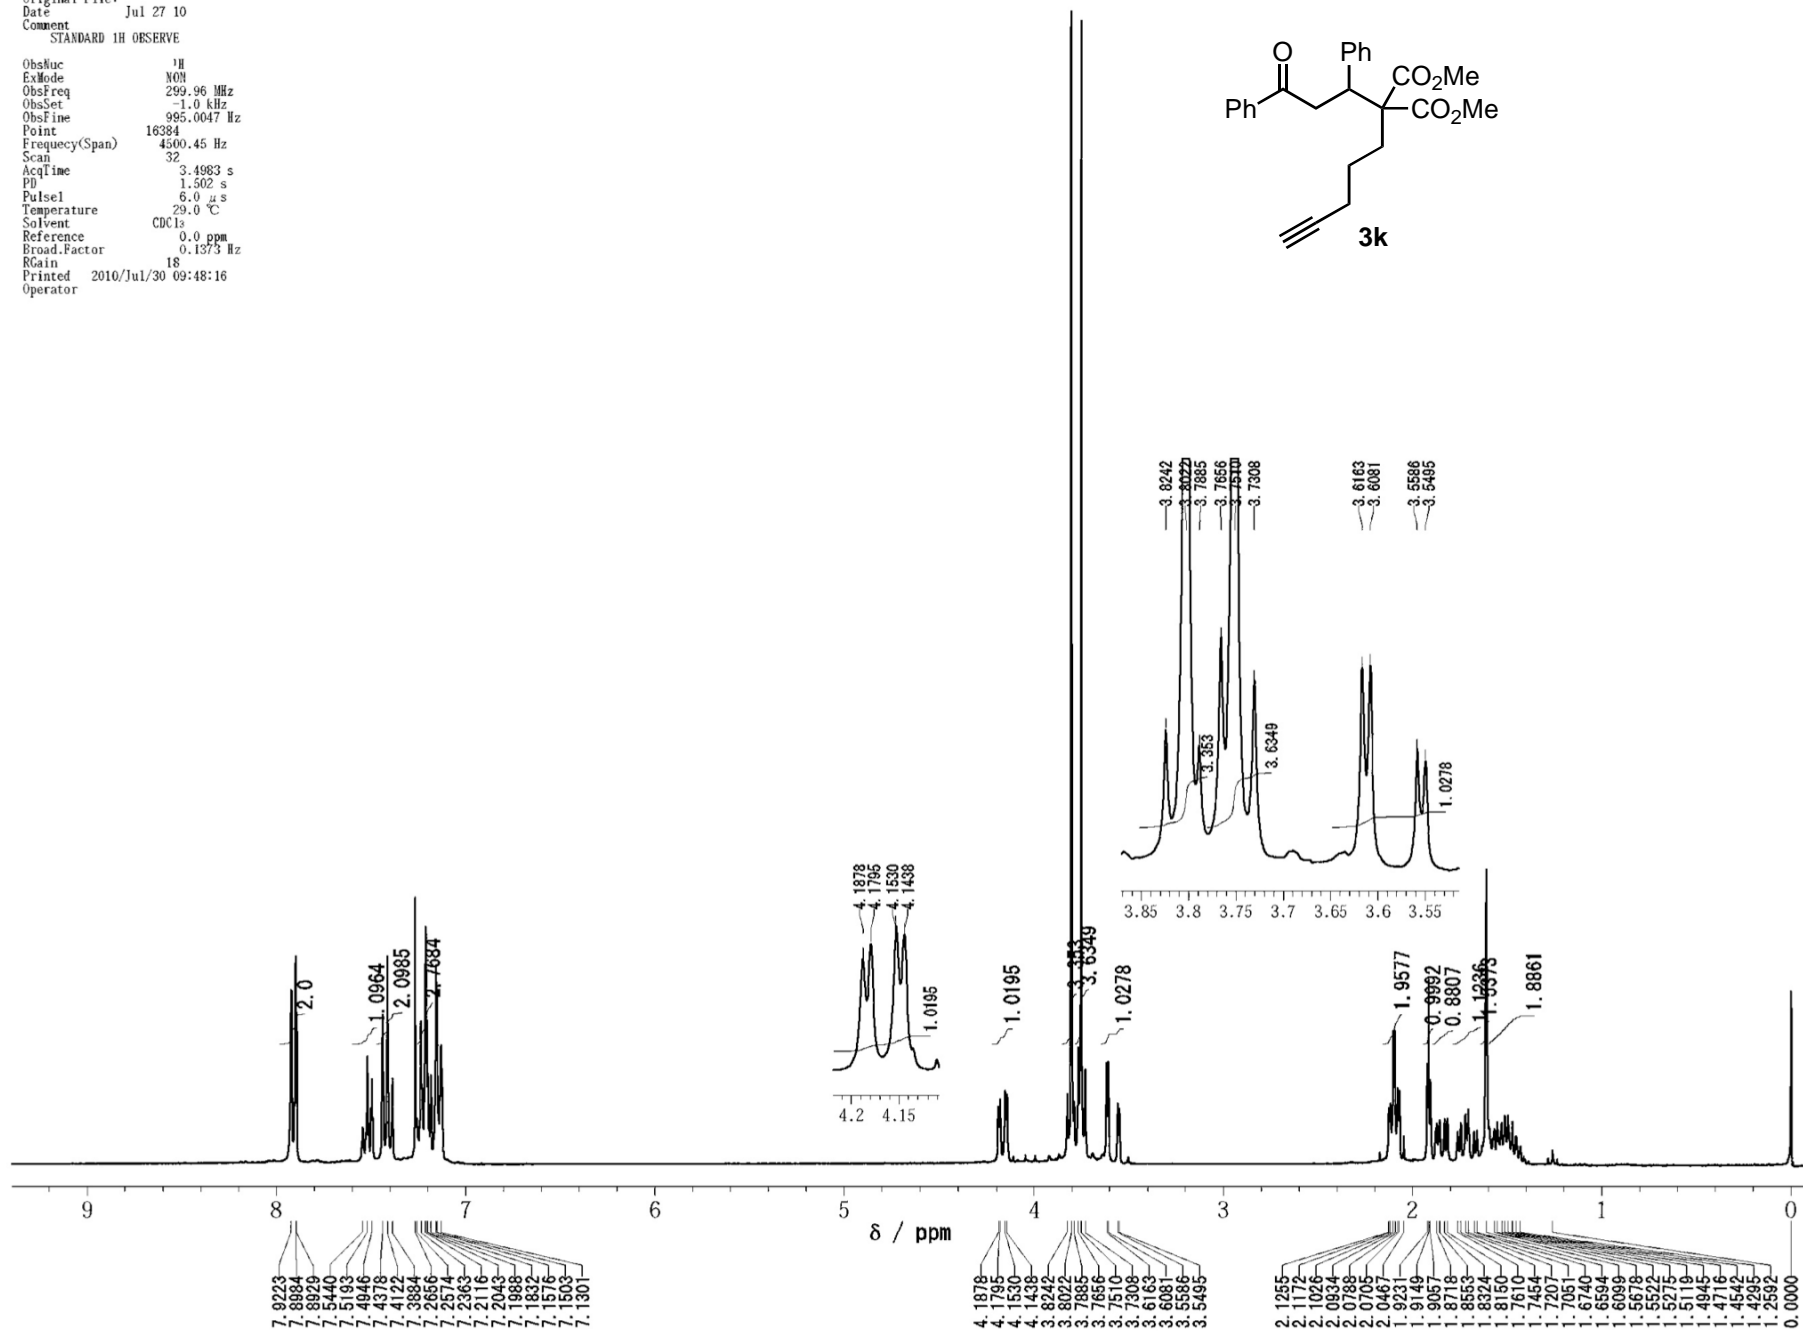



Original File:  
 Date Jul 27 10  
 Comment  
 C13 Standard Observe  
 Stick=none Tune=6.4 Match=0.4

ObsRoc 13C  
 ExMode NOM  
 ObsFreq 75.43 MHz  
 ObsSet -1.0 kHz  
 ObsFine 996.3672 Hz  
 Point 32768  
 Frequency(Span) 18761.73 Hz  
 Scan 9920  
 AcqTime 1.4992 s  
 PD 1.501 s  
 Pulse 6.0  $\mu$ s  
 Temperature 29.0  $^{\circ}$ C  
 Solvent CDCl<sub>3</sub>  
 Reference 77.0 ppm  
 Broad.Factor 0.2863 Hz  
 RGain 30  
 Printed 2010/Jul/30 09:49:26  
 Operator

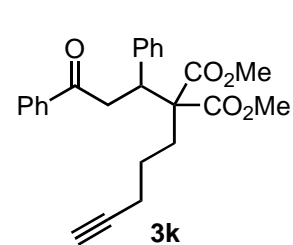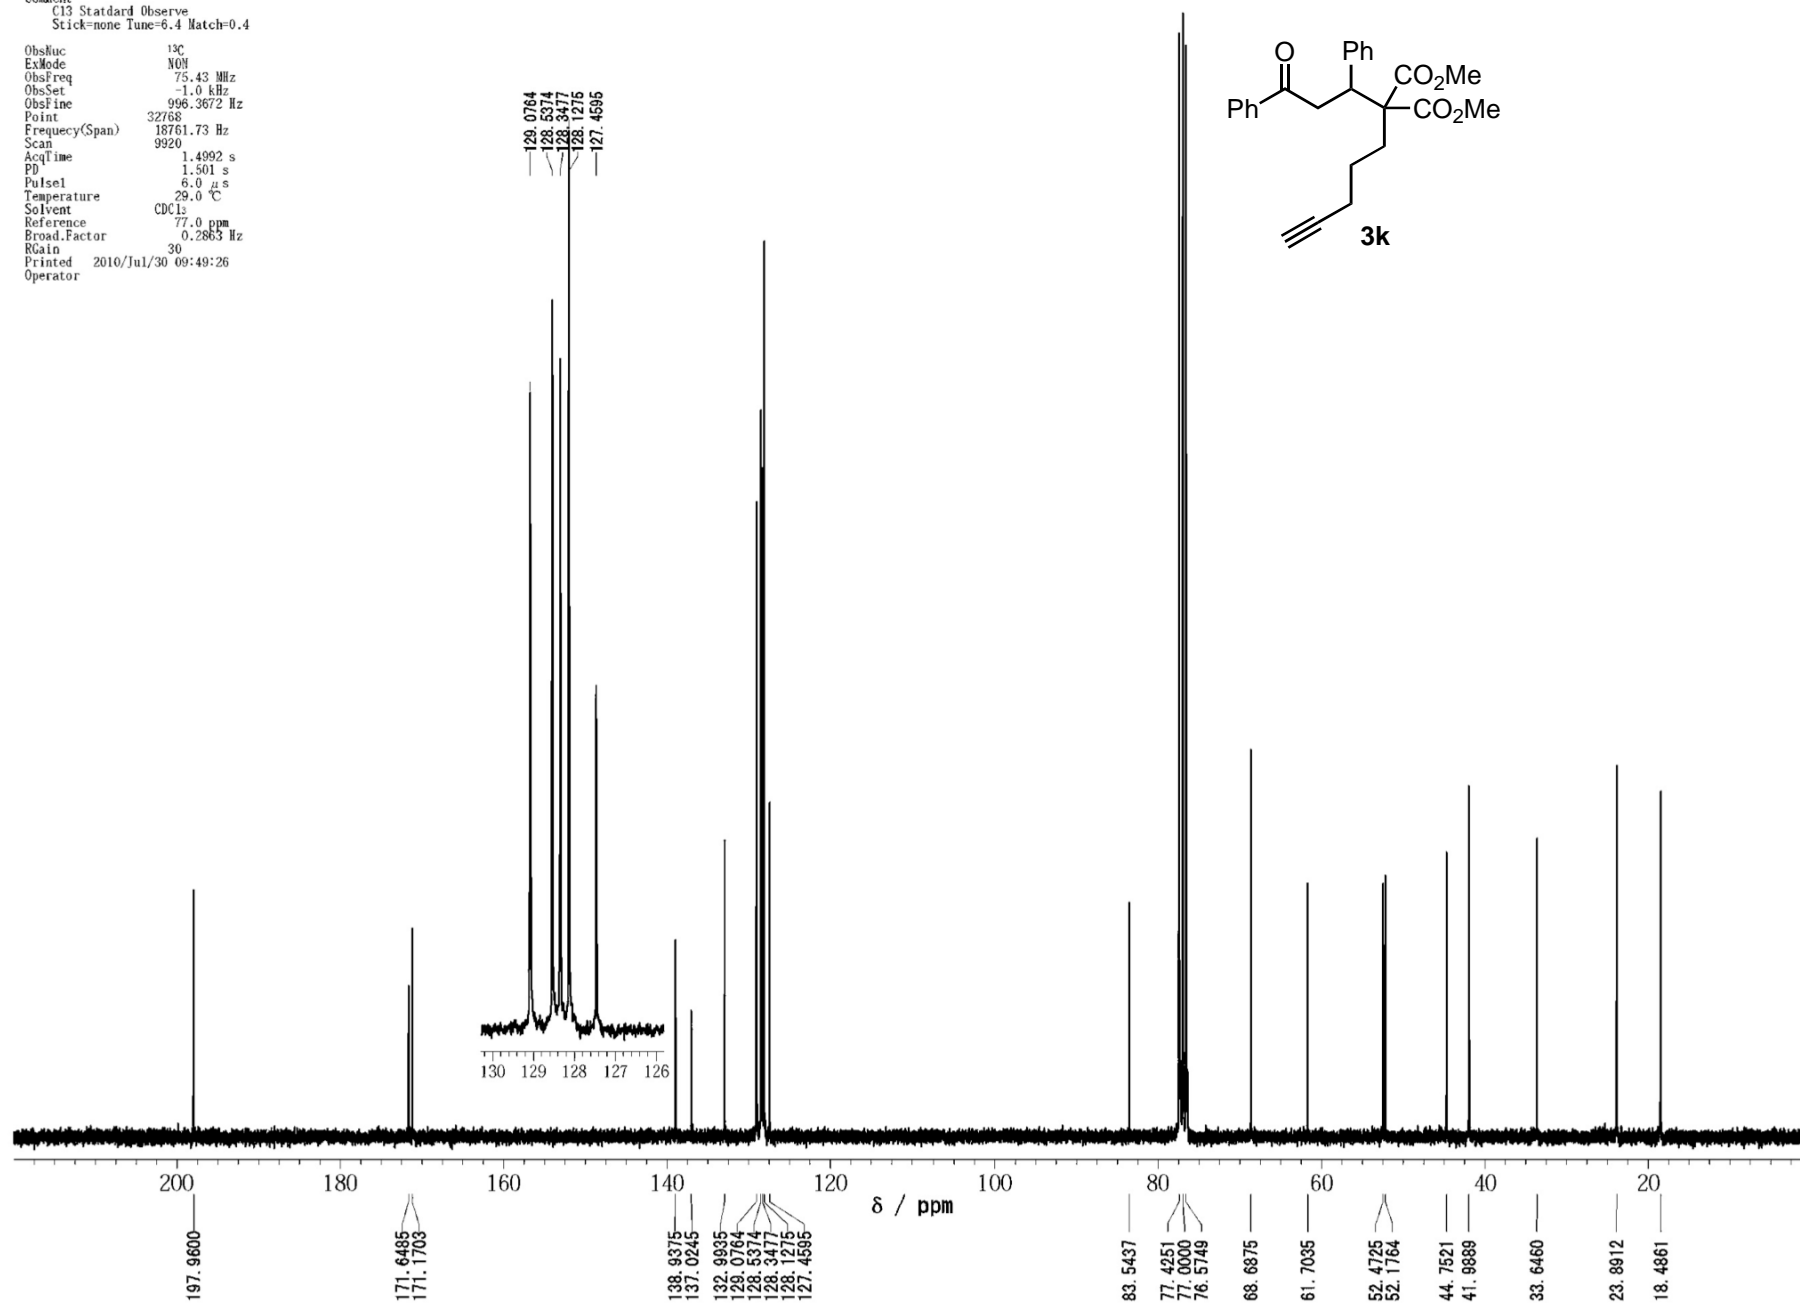

Original File: Jun 14 10  
 Date: Jun 14 10  
 Comment: STANDARD 1H OBSERVE  
 ObsRuoc: 1H  
 ExMode: NMR  
 ObsFreq: 299.96 MHz  
 ObsSet: -1.0 kHz  
 ObsFine: 995.0047 Hz  
 Point: 16384  
 Frequency(Span): 4500.45 Hz  
 Scan: 16  
 AcqTime: 3.4983 s  
 PD: 1.502 s  
 Pulse1: 6.0  $\mu$ s  
 Temperature: 29.0  $^{\circ}$ C  
 Solvent: CDCl<sub>3</sub>  
 Reference: 0.0 ppm  
 Broad.Factor: 0.1373 Hz  
 RGain: 24  
 Printed: 2010/Jul/30 13:23:16  
 Operator:

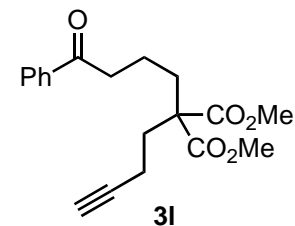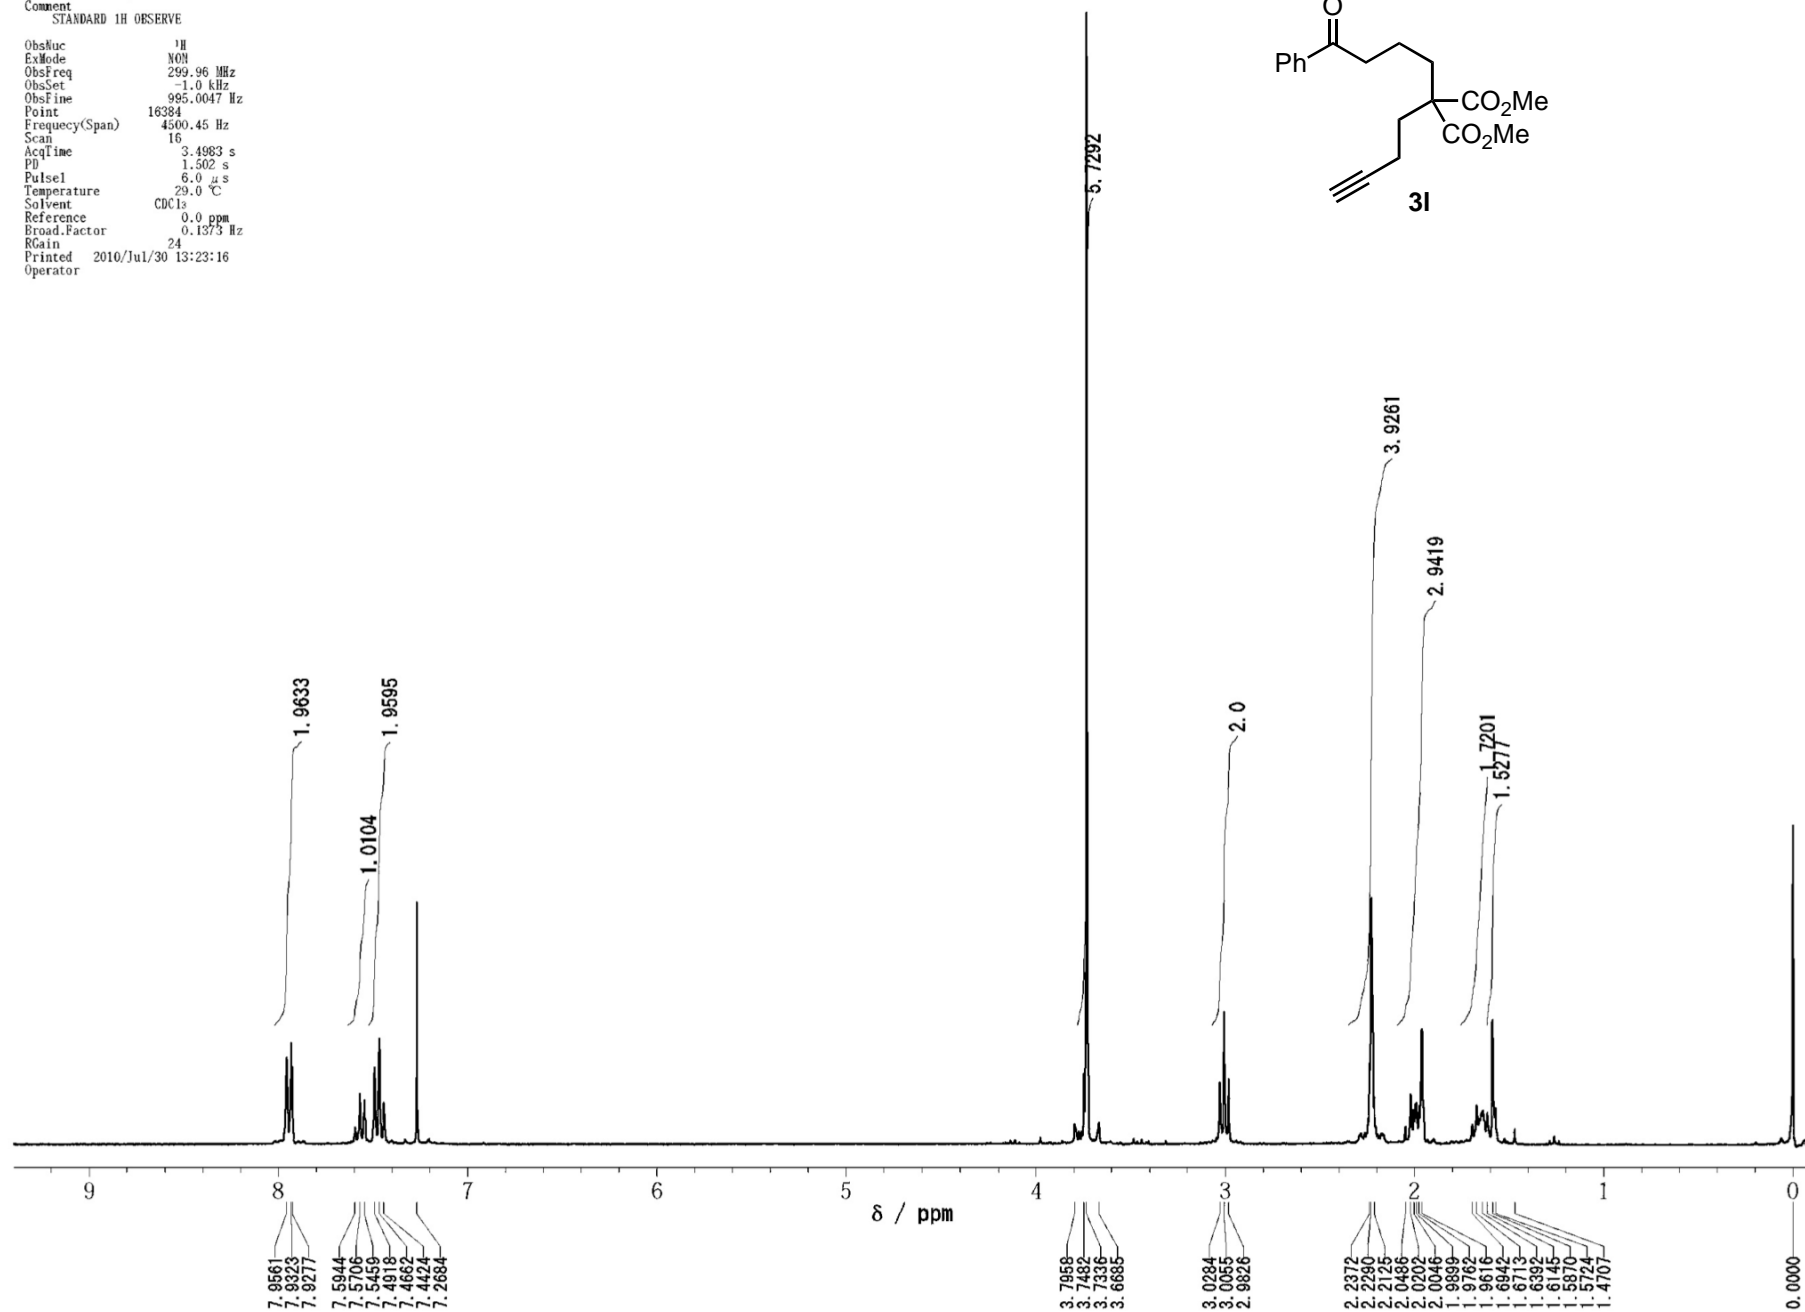

Original File:  
 Date Jun 14 10  
 Comment  
 C13 Standard Observe  
 Stick=none Tune=6.4 Match=0.4

ObsRoc 13C  
 ExMode NOM  
 ObsFreq 75.43 MHz  
 ObsSet -1.0 kHz  
 ObsFine 996.3672 Hz  
 Point 32768  
 Frequency(Span) 18761.73 Hz  
 Scan 168  
 AcqTime 1.4992 s  
 PD 1.501 s  
 Pulse 6.0  $\mu$ s  
 Temperature 29.0  $^{\circ}$ C  
 Solvent CDCl<sub>3</sub>  
 Reference 77.0 ppm  
 Broad.Factor 0.2863 Hz  
 RGain 30  
 Printed 2010/Jul/30 13:24:30  
 Operator

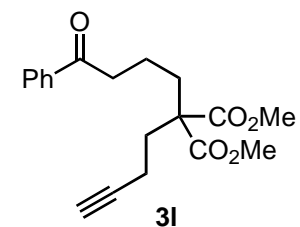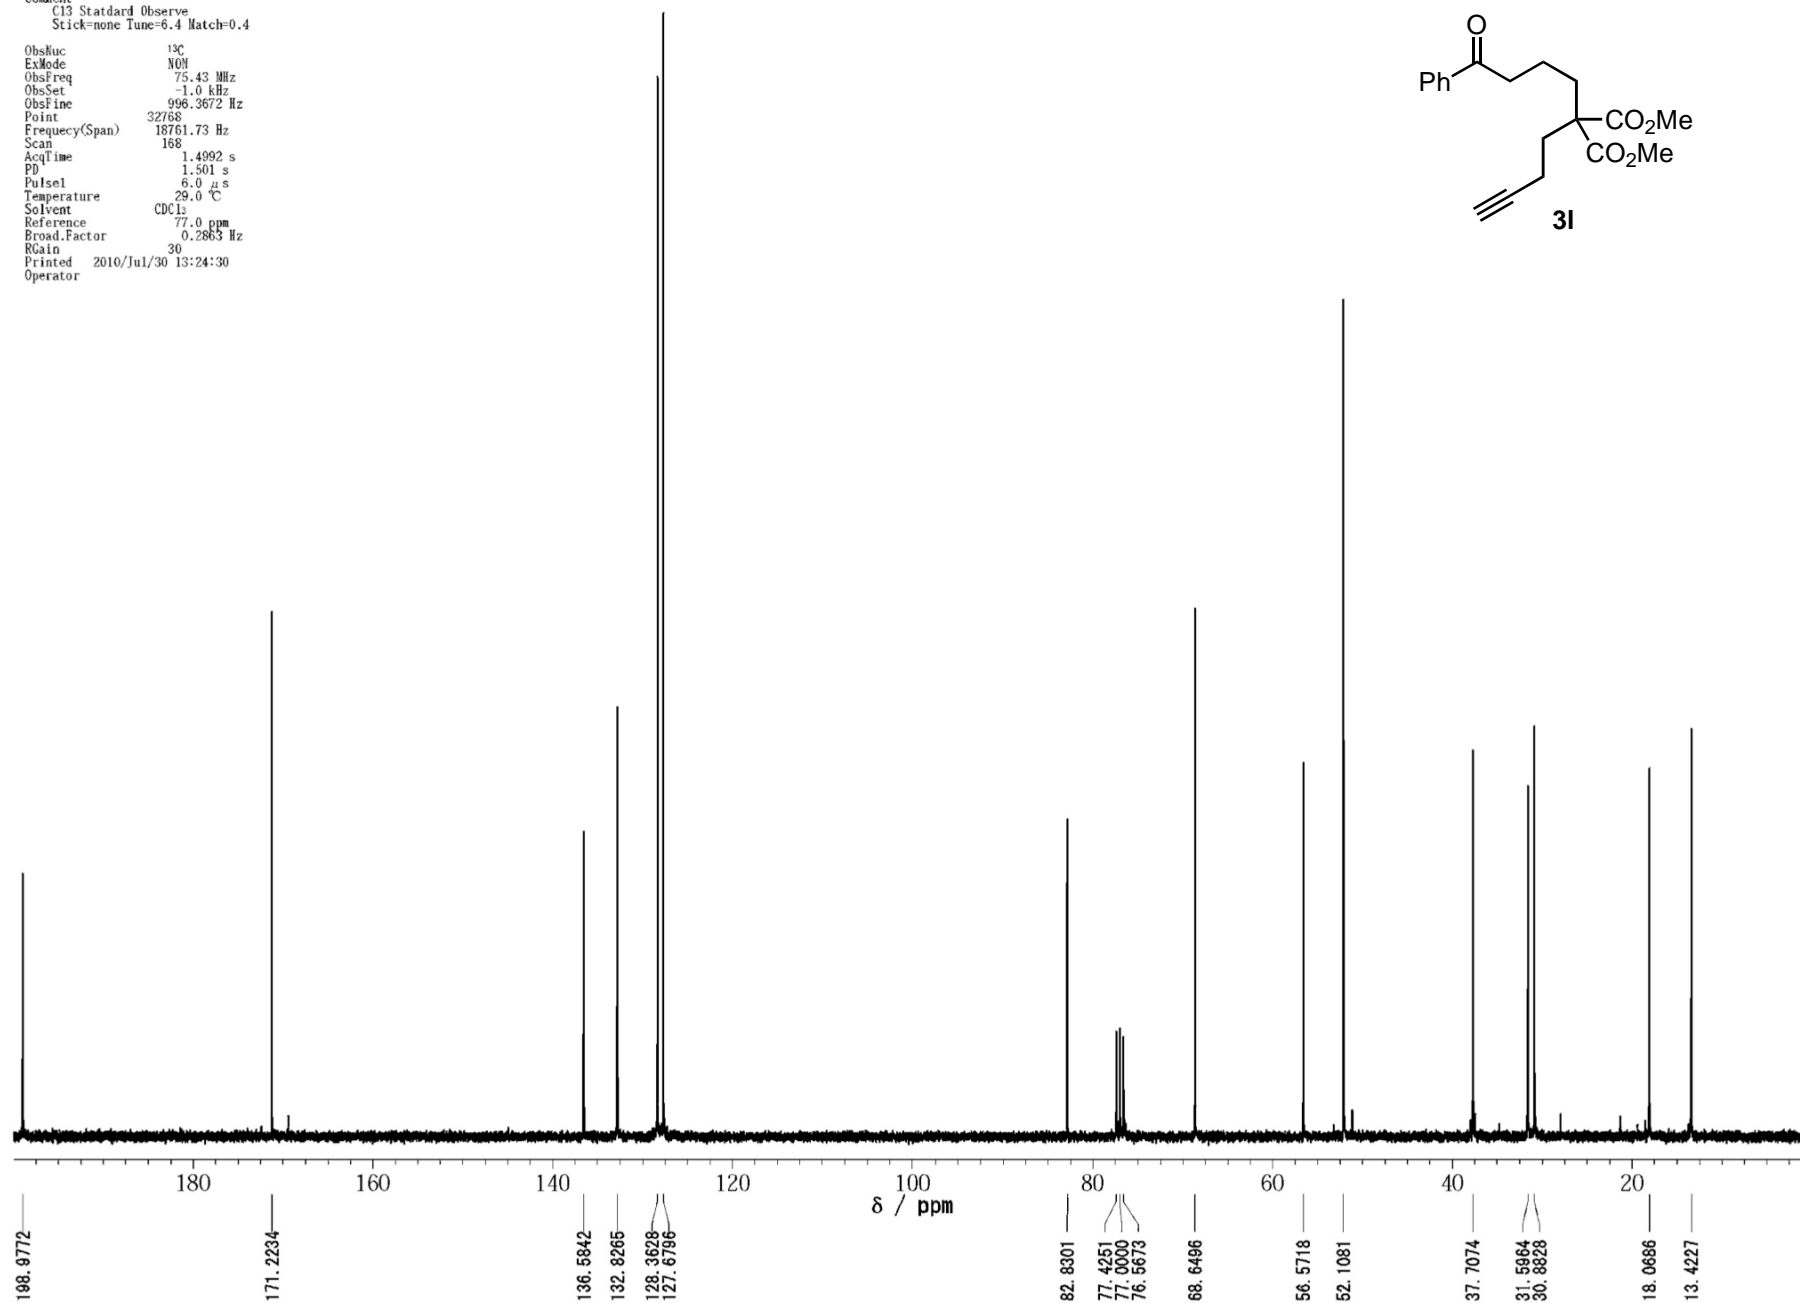

Original File:  
 Date Apr 8 10  
 Comment  
 STANDARD 1H OBSERVE  
 ObsRuoc 1H  
 ExMode NMR  
 ObsFreq 299.96 MHz  
 ObsSet -1.0 kHz  
 ObsFine 995.0047 Hz  
 Point 16384  
 Frequency(Span) 4500.45 Hz  
 Scan 32  
 AcqTime 3.4983 s  
 PD 1.502 s  
 Pulse1 6.0  $\mu$ s  
 Temperature 29.0  $^{\circ}$ C  
 Solvent CDCl<sub>3</sub>  
 Reference 7.26 ppm  
 Broad.Factor 0.1373 Hz  
 RGain 24  
 Printed 2010/Jul/30 13:37:14  
 Operator

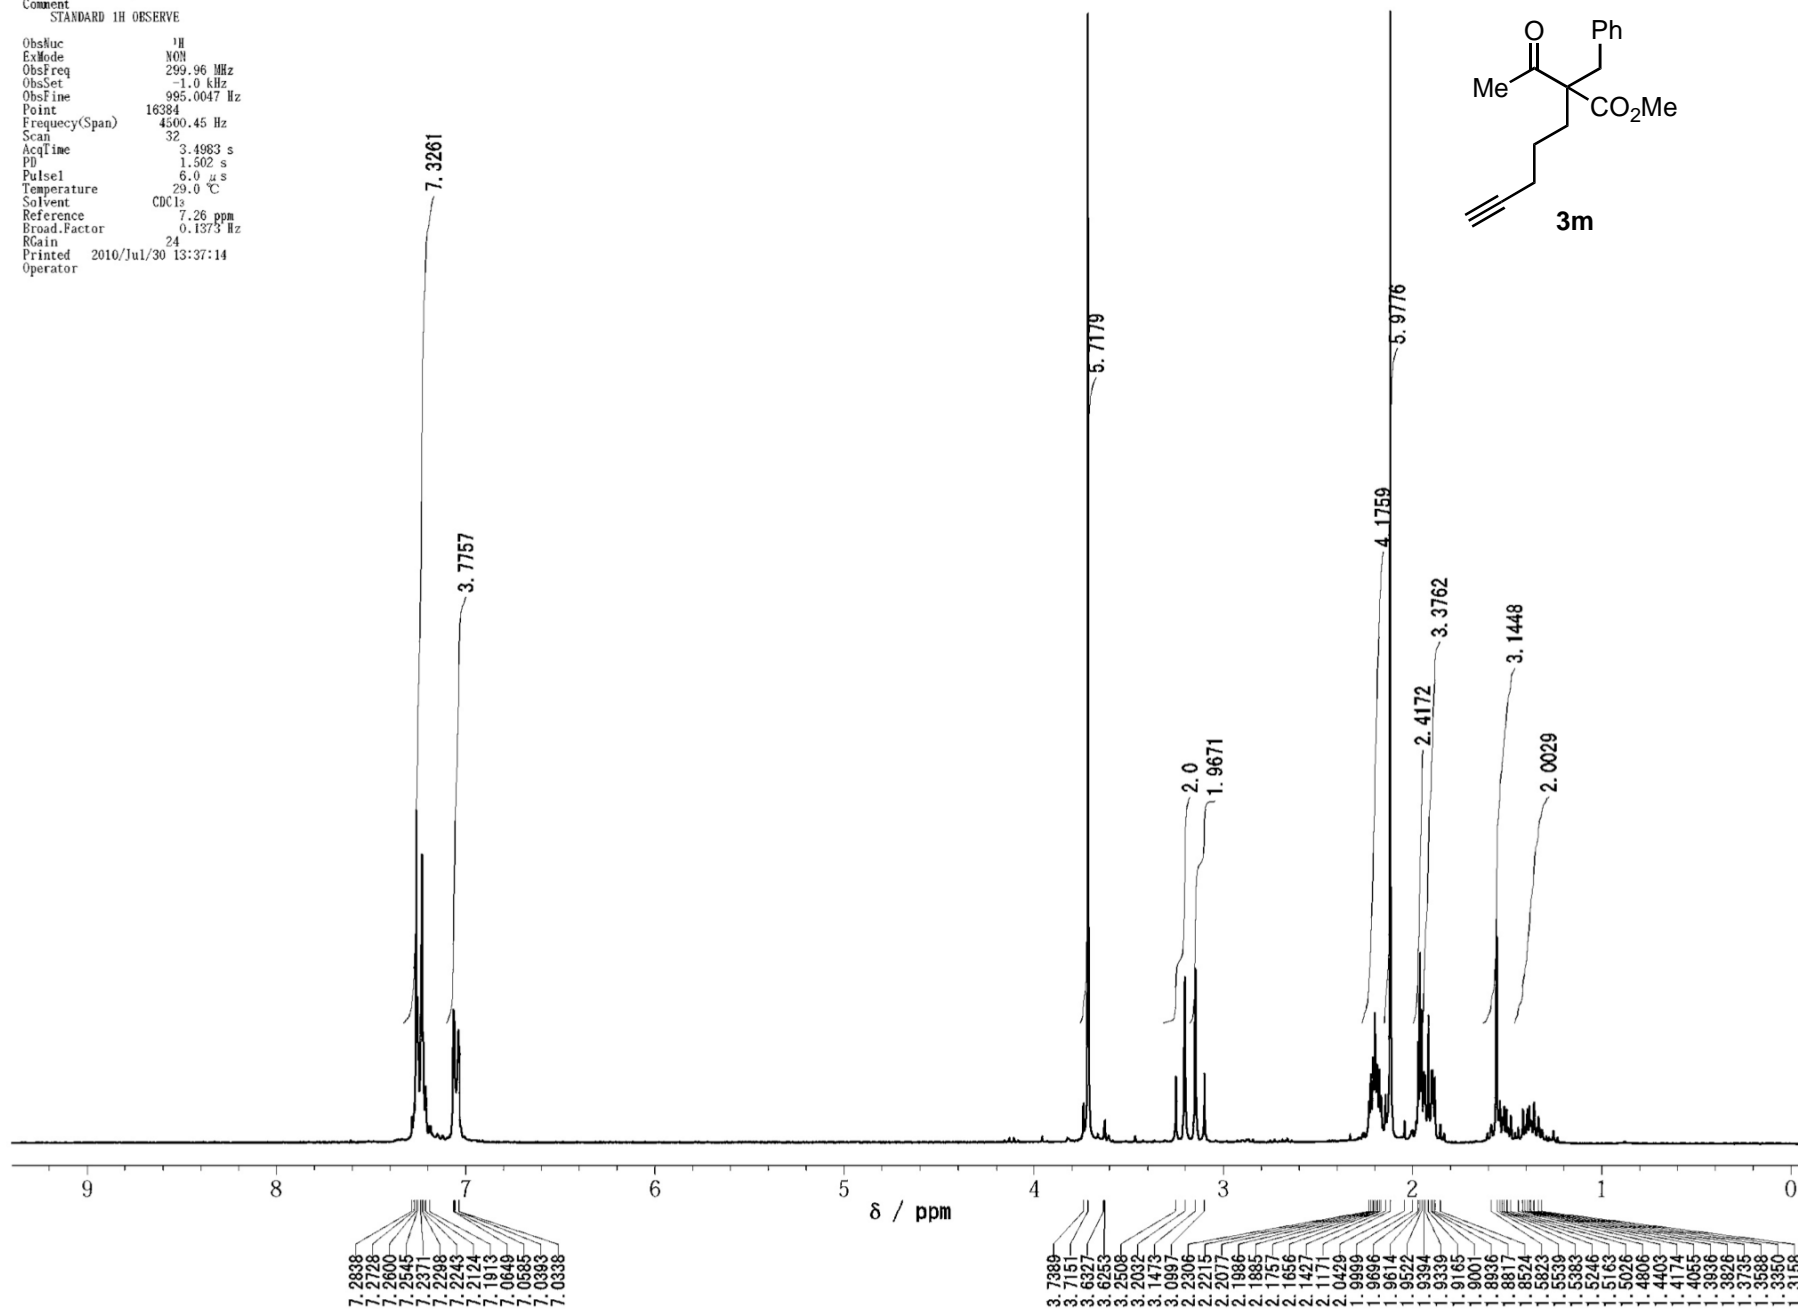

Original File:  
Date Apr 8 10  
Comment  
C13 Standard Observe  
Stick=none Tune=6.4 Match=0.4

ObsRuc 13C  
ExMode NOM  
ObsFreq 75.43 MHz  
ObsSet -1.0 kHz  
ObsFine 996.3672 Hz  
Point 32768  
Frequency(Span) 18761.73 Hz  
Scan 128  
AcqTime 1.4992 s  
PD 1.501 s  
Pulse1 6.0  $\mu$ s  
Temperature 29.0  $^{\circ}$ C  
Solvent CDCl<sub>3</sub>  
Reference 77.0 ppm  
Broad.Factor 0.2863 Hz  
RGain 30  
Printed 2010/Jul/30 13:39:46  
Operator

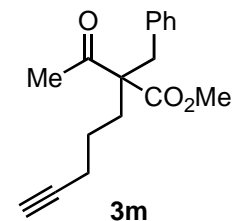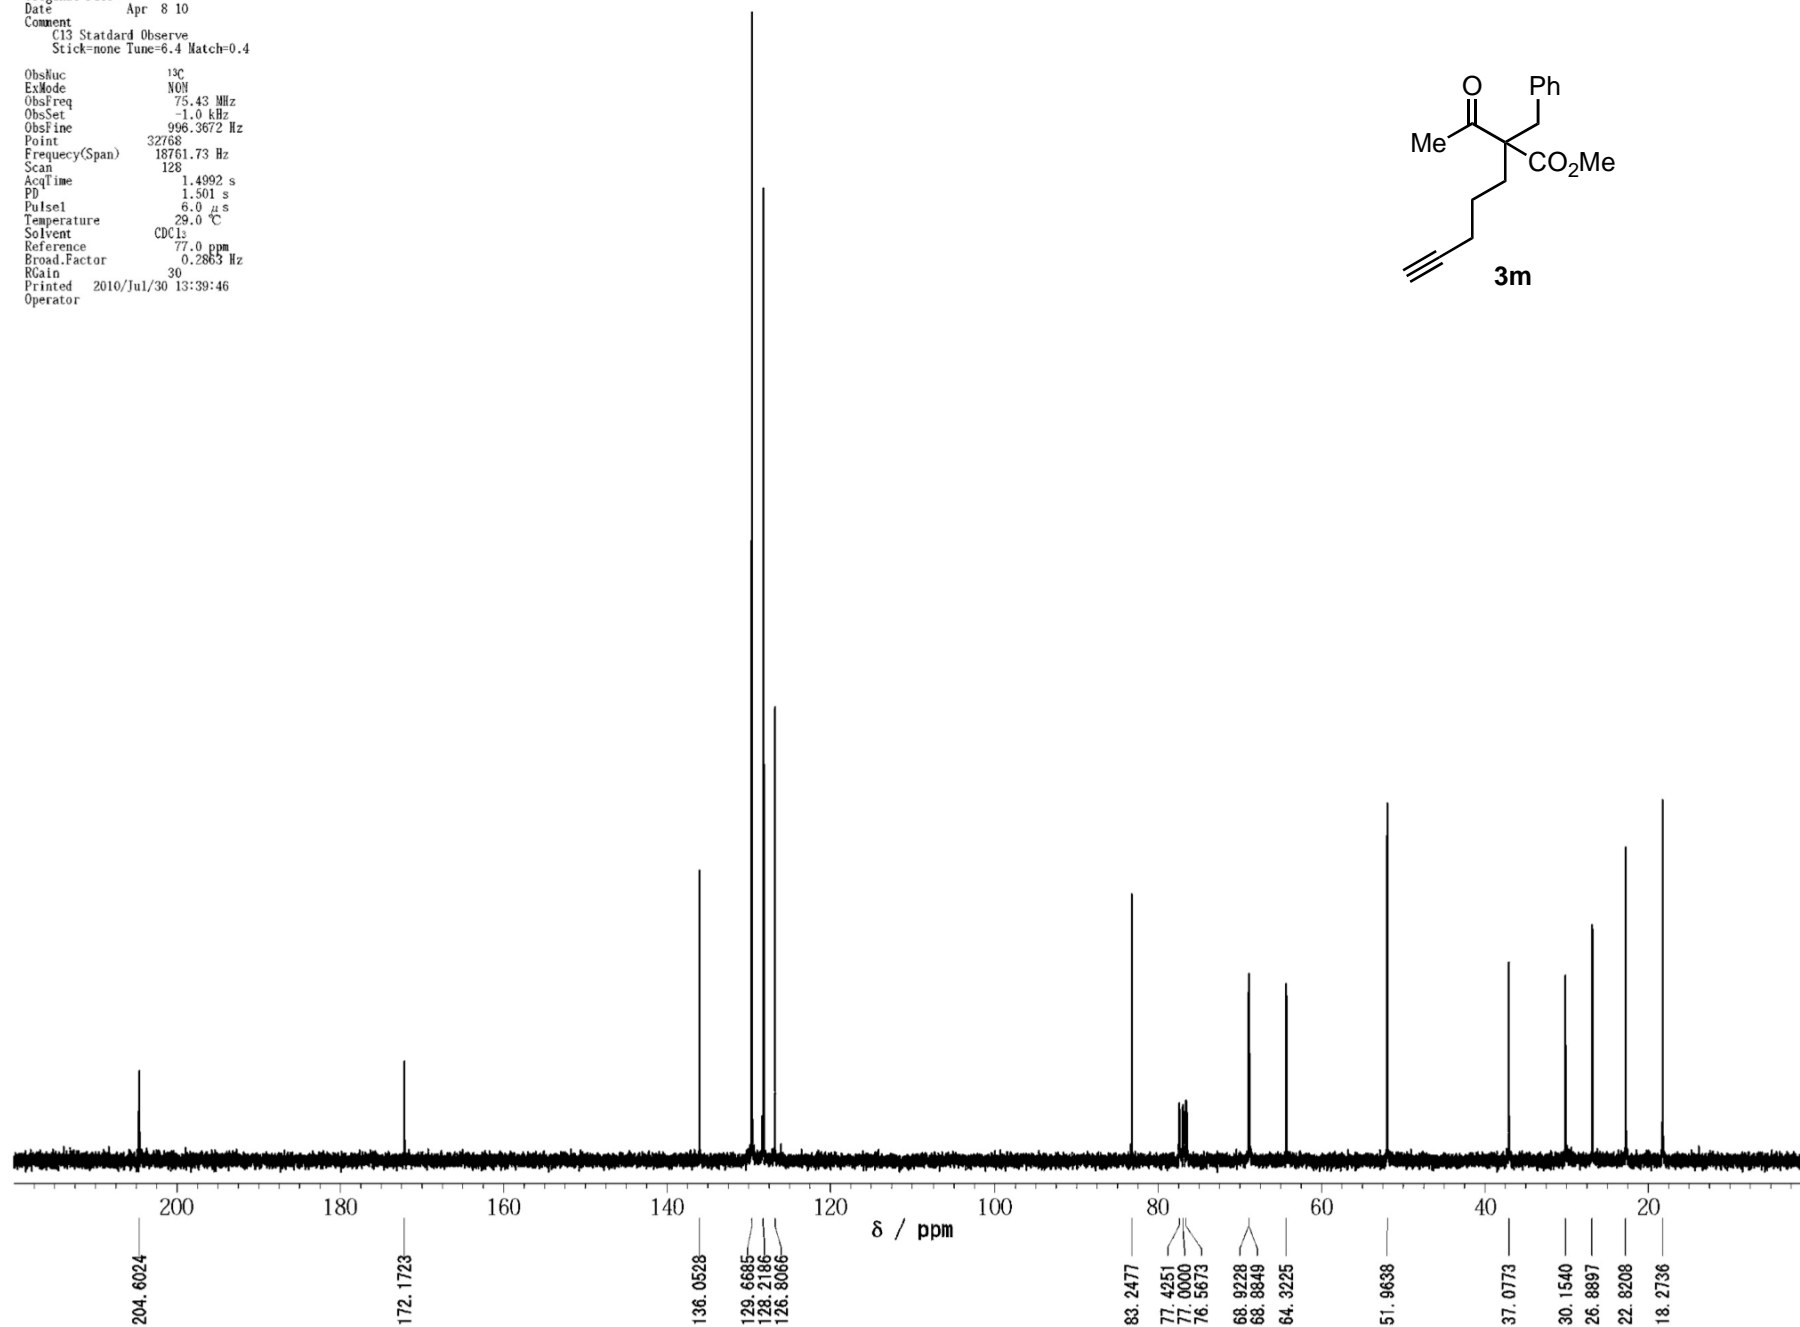

Original File:  
Date Jun 25 10  
Comment  
STANDARD 1H OBSERVE

|                 |                      |
|-----------------|----------------------|
| ObsMod          | 1H                   |
| ExMode          | NOM                  |
| ObsFreq         | 299.96 MHz           |
| ObsSet          | -1.0 kHz             |
| ObsFine         | 995.0047 Hz          |
| Point           | 16384                |
| Frequency(Span) | 4500.45 Hz           |
| Scan            | 15                   |
| AcqTime         | 3.4983 s             |
| PD              | 1.502 s              |
| Pulse1          | 6.0 $\mu$ s          |
| Temperature     | 29.0 $^{\circ}$ C    |
| Solvent         | CDCl <sub>3</sub>    |
| Reference       | 0.0 ppm              |
| Broad.Factor    | 0.1373 Hz            |
| RGain           | 18                   |
| Printed         | 2010/Jul/29 22:27:13 |
| Operator        |                      |

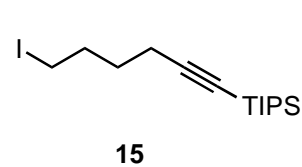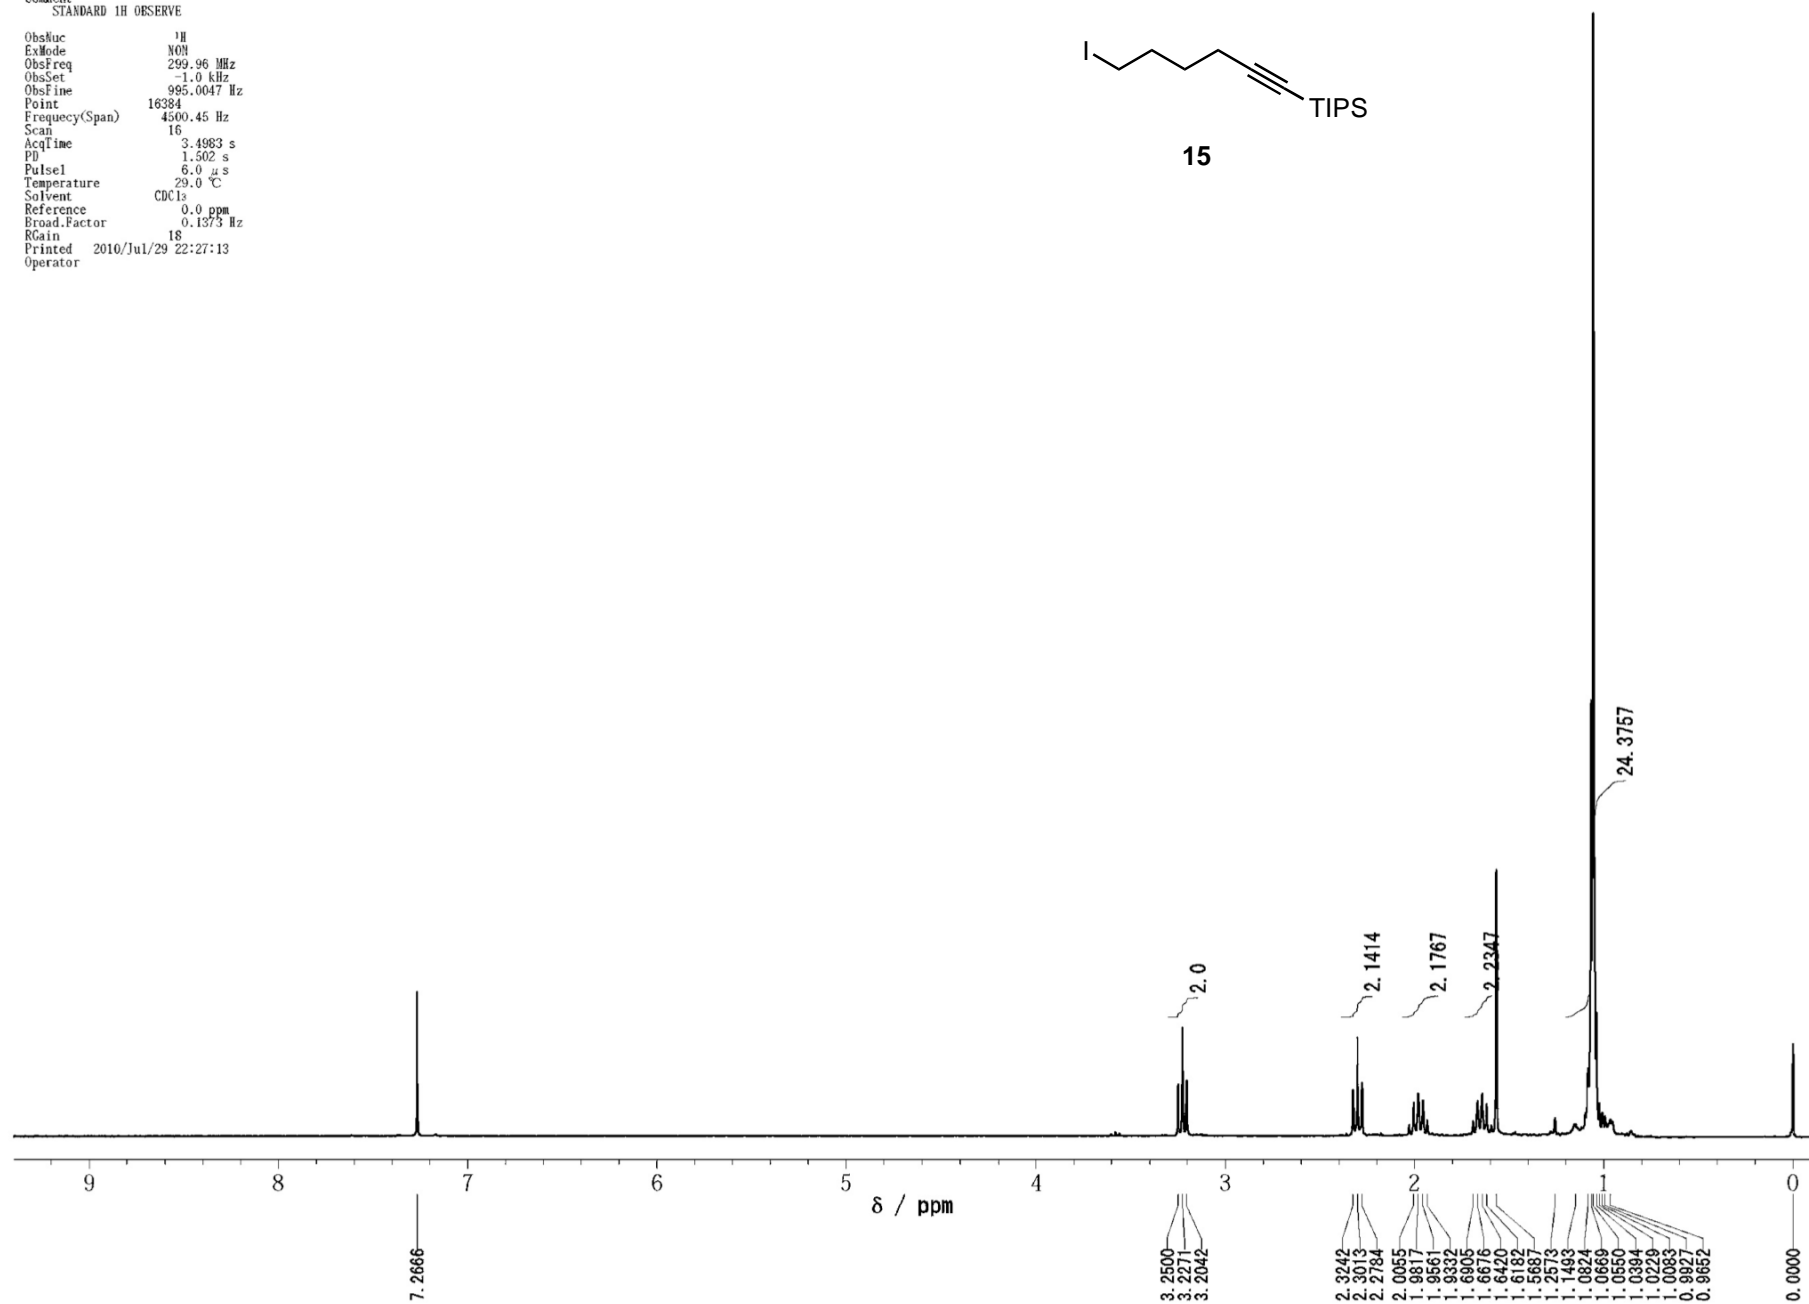

Original File:  
 Date Jun 25 10  
 Comment C13 Standard Observe  
 Stick=none Tune=6.4 Match=0.4

ObsRoc 13C  
 ExMode NOM  
 ObsFreq 75.43 MHz  
 ObsSet -1.0 kHz  
 ObsFine 996.3672 Hz  
 Point 32768  
 Frequency(Span) 18761.73 Hz  
 Scan 48  
 AcqTime 1.4992 s  
 PD 1.501 s  
 Pulse 6.0  $\mu$ s  
 Temperature 29.0  $^{\circ}$ C  
 Solvent CDCl<sub>3</sub>  
 Reference 77.0 ppm  
 Broad.Factor 0.2863 Hz  
 RGain 30  
 Printed 2010/Jul/29 22:28:45  
 Operator

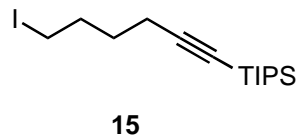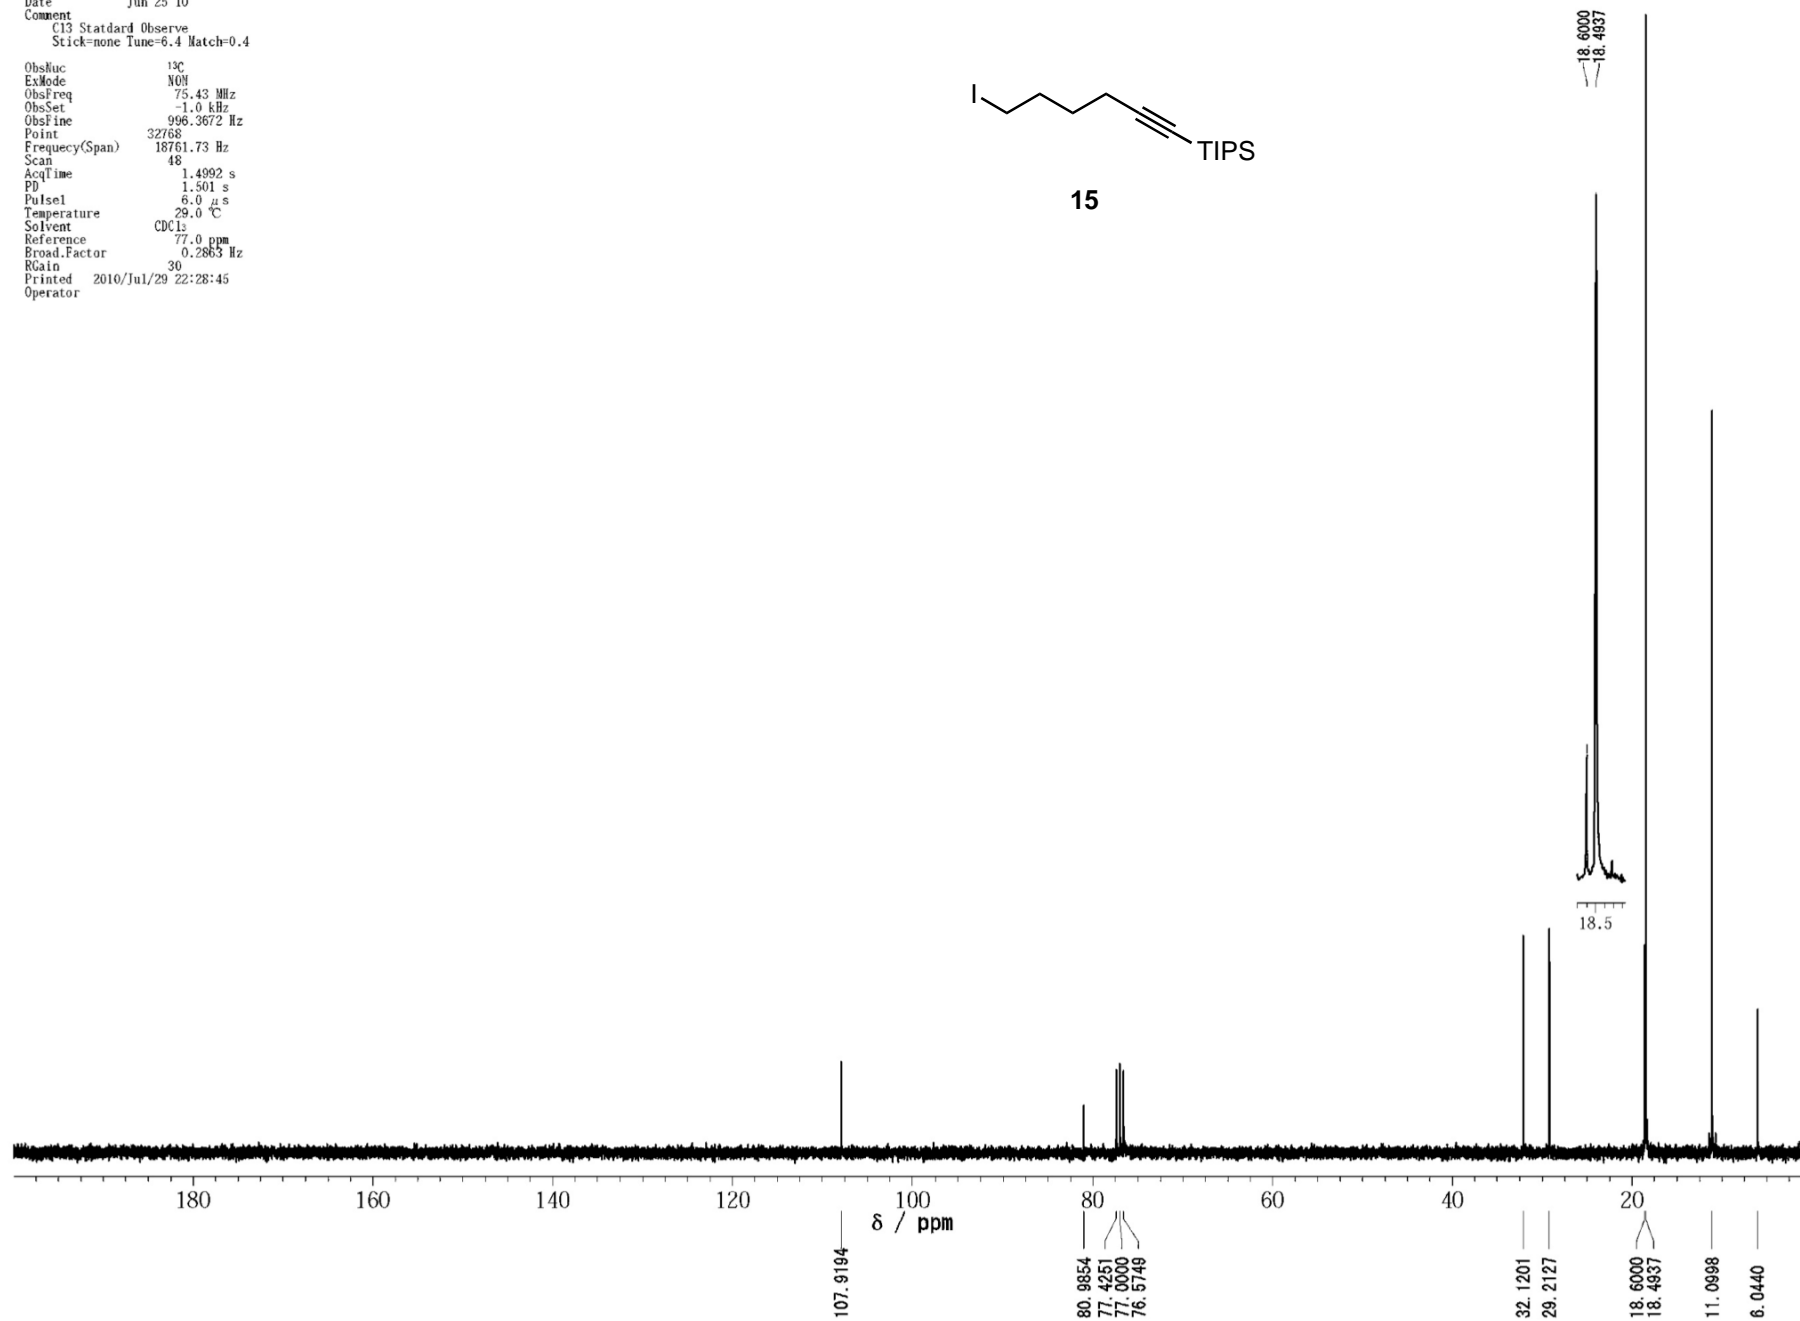

Supplement: Supplementary file 1 [file 4401865]
